# Supplementary material for: Immunomodulatory dynamics in the porcine myometrium: global transcriptome analysis, including the effects of PPARγ ligands
Source: BMC Genomics. 2024 Dec 5;25:1183. doi: 10.1186/s12864-024-11083-7 (PMC11619573; doi:10.1186/s12864-024-11083-7)
Supplement: Supplementary file 1 — Supplementary Material 1 [file 12864_2024_11083_MOESM1_ESM.xlsx]

## Sheet: Arkusz1
Sample	raw reads	trimmed reads	percent of trimmed reads	uniquely mapped reads	percent of uniquely mapped reads
CtrP1	29461057	28663529	97.29	26491034	92.42
CtrP2	33796475	33105427	97.96	30763783	92.93
CtrP3	27499069	26386300	95.95	23298386	88.3
CtrC4	26165083	25314365	96.75	22645447	89.46
CtrC5	20820009	20074290	96.42	17913556	89.24
CtrC6	22127658	21472593	97.04	19045055	88.69
PP1	25829409	25248256	97.75	23490637	93.04
PP2	38170054	37377279	97.92	34241190	91.61
PP3	27714088	26890943	97.03	24631529	91.6
PC4	26017492	25496376	98	22702025	89.04
PC5	32135374	31167986	96.99	29164657	93.57
PC6	26525186	25830712	97.38	23542530	91.14
TP1	23133256	22560686	97.52	20763654	92.03
TP2	32165833	31304675	97.32	28705560	91.7
TP3	30166706	28800887	95.47	26186315	90.92
TC4	31598560	30536139	96.64	28031037	91.8
TC5	29880383	29064840	97.27	25634614	88.2
TC6	25267981	24618272	97.43	21983938	89.3
