# Supplementary material for: Immunomodulatory dynamics in the porcine myometrium: global transcriptome analysis, including the effects of PPARγ ligands
Source: BMC Genomics. 2024 Dec 5;25:1183. doi: 10.1186/s12864-024-11083-7 (PMC11619573; doi:10.1186/s12864-024-11083-7)
Supplement: Supplementary file 2 — Supplementary Material 2 [file 12864_2024_11083_MOESM2_ESM.xlsx]

## Sheet: CONP vs. CONC
Results of Gene Ontology, KEEG, HP and REAC enrichment analyses of differentially expressed genes in the porcine myometrium on days 14-15 of pregnancy vs. 14-15 of the estrous cycle
	term_name	term_id	source	term_size	query_size	intersection_size	intersection	gene_names
1	positive regulation of biological process	GO:0048518	GO:BP	4911	832	372	ENSSSCG00000000006,ENSSSCG00000000078,ENSSSCG00000000135,ENSSSCG00000000217,ENSSSCG00000000396,ENSSSCG00000000457,ENSSSCG00000000475,ENSSSCG00000000625,ENSSSCG00000000700,ENSSSCG00000000753,ENSSSCG00000000932,ENSSSCG00000000950,ENSSSCG00000001252,ENSSSCG00000001341,ENSSSCG00000001394,ENSSSCG00000001453,ENSSSCG00000001509,ENSSSCG00000001523,ENSSSCG00000001567,ENSSSCG00000001595,ENSSSCG00000001667,…	PPARA,TNRC6B,KCTD17,RACGAP1,STAT2,USP15,IRAK3,LRP6,ACRBP,WNK1,NTS,E2F7,UBD,ENSSSCG00000001341,ENSSSCG00000001394,HLA-DRA,DAXX,GRM4,CPNE5,DAAM2,ZNF318,RUNX2,TNFRSF21,STRA6,PML,NFKBIA,BAZ1A,IRF9,SLCO3A1,WARS1,ATP2C2,NFAT5,SALL1,EXOSC5,BBC3,PLEKHA4,MED25,MAD2L2,PUM1,HCRTR1,MFSD2A,IMPACT,CELF4,PDE4B,DOCK7,TACSTD2,MOB3C,ENSSSCG00000003989,TAB2,TNFAIP3,RSPO3,TPD52L1,ADGRB3,SMAD7,LIPG,ZNF609,MAPK6,GATM,…
2	positive regulation of cellular process	GO:0048522	GO:BP	4463	832	342	ENSSSCG00000000006,ENSSSCG00000000078,ENSSSCG00000000135,ENSSSCG00000000217,ENSSSCG00000000396,ENSSSCG00000000457,ENSSSCG00000000475,ENSSSCG00000000625,ENSSSCG00000000700,ENSSSCG00000000753,ENSSSCG00000000932,ENSSSCG00000000950,ENSSSCG00000001252,ENSSSCG00000001341,ENSSSCG00000001394,ENSSSCG00000001453,ENSSSCG00000001509,ENSSSCG00000001523,ENSSSCG00000001567,ENSSSCG00000001595,ENSSSCG00000001667,…	PPARA,TNRC6B,KCTD17,RACGAP1,STAT2,USP15,IRAK3,LRP6,ACRBP,WNK1,NTS,E2F7,UBD,ENSSSCG00000001341,ENSSSCG00000001394,HLA-DRA,DAXX,GRM4,CPNE5,DAAM2,ZNF318,RUNX2,PML,NFKBIA,BAZ1A,IRF9,SLCO3A1,WARS1,NFAT5,SALL1,EXOSC5,BBC3,PLEKHA4,MED25,MAD2L2,PUM1,HCRTR1,MFSD2A,IMPACT,CELF4,PDE4B,DOCK7,TACSTD2,MOB3C,ENSSSCG00000003989,TAB2,TNFAIP3,RSPO3,TPD52L1,ADGRB3,SMAD7,ZNF609,ENSSSCG00000004687,THBS1,ZNF516,NIN,LG…
3	response to stress	GO:0006950	GO:BP	2938	832	257	ENSSSCG00000000006,ENSSSCG00000000206,ENSSSCG00000000396,ENSSSCG00000000457,ENSSSCG00000000475,ENSSSCG00000000774,ENSSSCG00000000950,ENSSSCG00000001233,ENSSSCG00000001252,ENSSSCG00000001382,ENSSSCG00000001509,ENSSSCG00000001516,ENSSSCG00000001912,ENSSSCG00000001952,ENSSSCG00000002283,ENSSSCG00000002298,ENSSSCG00000002311,ENSSSCG00000002469,ENSSSCG00000002716,ENSSSCG00000002755,ENSSSCG00000002841,…	PPARA,FAIM2,STAT2,USP15,IRAK3,USP18,E2F7,TRIM26,UBD,DDR1,DAXX,ENSSSCG00000001516,PML,NFKBIA,FUT8,ZFYVE26,SUSD6,OTUB2,MLKL,NFAT5,N4BP1,EXOSC5,BBC3,MAD2L2,PUM1,MFSD2A,IMPACT,PTGER3,TAB2,TNFAIP3,TPD52L1,ASF1A,SMAD7,WDR76,THBS1,ZNF516,JAK2,ABCA1,TNC,TRAF1,LCN2,SETX,CCN3,FZD6,VCPIP1,SELP,F5,RCSD1,USF1,SLAMF1,NTRK1,ADAR,HIPK1,MOV10,VCAM1,GBP2,IDO1,RBL1,PTGIS,ZBP1,CIITA,PPL,ADRA2B,EIF2AK2,ADRA2C,LYAR,TE…
4	response to biotic stimulus	GO:0009607	GO:BP	1156	832	142	ENSSSCG00000000396,ENSSSCG00000000457,ENSSSCG00000000475,ENSSSCG00000000774,ENSSSCG00000001233,ENSSSCG00000001252,ENSSSCG00000001549,ENSSSCG00000001912,ENSSSCG00000001952,ENSSSCG00000002716,ENSSSCG00000002841,ENSSSCG00000003015,ENSSSCG00000003591,ENSSSCG00000003763,ENSSSCG00000003805,ENSSSCG00000004110,ENSSSCG00000004154,ENSSSCG00000005211,ENSSSCG00000005215,ENSSSCG00000005423,ENSSSCG00000005638,…	STAT2,USP15,IRAK3,USP18,TRIM26,UBD,FKBP5,PML,NFKBIA,MLKL,N4BP1,EXOSC5,PUM1,IFI44,PDE4B,TAB2,TNFAIP3,CD274,JAK2,ABCA1,LCN2,ADAR,MOV10,GBP2,IDO1,ZBP1,CIITA,EIF2AK2,CMPK2,LYAR,CXCL8,OTUD4,TIFA,ACOD1,ENSSSCG00000009672,HMGB2,DDX60,P2RX7,OAS2,TRAFD1,OASL,IFIT2,IFIT1,IFIT5,ENSSSCG00000011355,PDE12,PLSCR4,PARP14,DTX3L,NFKBIZ,MORC3,MX2,MX1,SMC1A,IRF7,UNC93B1,CDC42EP2,VWCE,SLC15A3,CFD,AP3B1,IRF1,CXCL14,EN…
5	defense response	GO:0006952	GO:BP	1296	832	152	ENSSSCG00000000006,ENSSSCG00000000396,ENSSSCG00000000457,ENSSSCG00000000475,ENSSSCG00000000774,ENSSSCG00000001233,ENSSSCG00000001252,ENSSSCG00000001912,ENSSSCG00000001952,ENSSSCG00000002716,ENSSSCG00000002841,ENSSSCG00000003015,ENSSSCG00000003591,ENSSSCG00000003788,ENSSSCG00000004110,ENSSSCG00000004154,ENSSSCG00000004789,ENSSSCG00000005215,ENSSSCG00000005494,ENSSSCG00000005638,ENSSSCG00000006002,…	PPARA,STAT2,USP15,IRAK3,USP18,TRIM26,UBD,PML,NFKBIA,MLKL,N4BP1,EXOSC5,PUM1,PTGER3,TAB2,TNFAIP3,THBS1,JAK2,TNC,LCN2,CCN3,SELP,SLAMF1,ADAR,MOV10,VCAM1,GBP2,IDO1,PTGIS,ZBP1,CIITA,EIF2AK2,LYAR,CXCL8,CXCL2,CXCL11,OTUD4,TIFA,ACOD1,S1PR3,ENSSSCG00000009672,HMGB2,DDX60,P2RX7,OAS2,TRAFD1,OASL,IFIT2,IFIT1,IFIT5,ELF3,ENSSSCG00000011355,PDE12,APOD,PARP14,DTX3L,NFKBIZ,MORC3,MX2,MX1,TIMP1,IRF7,UNC93B1,CDC42EP2…
6	response to other organism	GO:0051707	GO:BP	1121	832	139	ENSSSCG00000000396,ENSSSCG00000000457,ENSSSCG00000000475,ENSSSCG00000000774,ENSSSCG00000001233,ENSSSCG00000001252,ENSSSCG00000001549,ENSSSCG00000001912,ENSSSCG00000001952,ENSSSCG00000002716,ENSSSCG00000002841,ENSSSCG00000003015,ENSSSCG00000003591,ENSSSCG00000003763,ENSSSCG00000003805,ENSSSCG00000004110,ENSSSCG00000004154,ENSSSCG00000005215,ENSSSCG00000005423,ENSSSCG00000005638,ENSSSCG00000006543,…	STAT2,USP15,IRAK3,USP18,TRIM26,UBD,FKBP5,PML,NFKBIA,MLKL,N4BP1,EXOSC5,PUM1,IFI44,PDE4B,TAB2,TNFAIP3,JAK2,ABCA1,LCN2,ADAR,MOV10,GBP2,IDO1,ZBP1,CIITA,EIF2AK2,CMPK2,LYAR,CXCL8,OTUD4,TIFA,ACOD1,ENSSSCG00000009672,HMGB2,DDX60,P2RX7,OAS2,TRAFD1,OASL,IFIT2,IFIT1,IFIT5,ENSSSCG00000011355,PDE12,PLSCR4,PARP14,DTX3L,NFKBIZ,MORC3,MX2,MX1,IRF7,UNC93B1,CDC42EP2,VWCE,SLC15A3,CFD,AP3B1,IRF1,CXCL14,ENSSSCG0000001…
7	biological process involved in interspecies interaction between organisms	GO:0044419	GO:BP	1248	832	148	ENSSSCG00000000006,ENSSSCG00000000396,ENSSSCG00000000457,ENSSSCG00000000475,ENSSSCG00000000774,ENSSSCG00000001233,ENSSSCG00000001252,ENSSSCG00000001549,ENSSSCG00000001912,ENSSSCG00000001952,ENSSSCG00000002716,ENSSSCG00000002841,ENSSSCG00000003015,ENSSSCG00000003591,ENSSSCG00000003763,ENSSSCG00000003805,ENSSSCG00000004110,ENSSSCG00000004154,ENSSSCG00000005215,ENSSSCG00000005423,ENSSSCG00000005638,…	PPARA,STAT2,USP15,IRAK3,USP18,TRIM26,UBD,FKBP5,PML,NFKBIA,MLKL,N4BP1,EXOSC5,PUM1,IFI44,PDE4B,TAB2,TNFAIP3,JAK2,ABCA1,LCN2,ADAR,MOV10,GBP2,IDO1,SLC20A2,ZBP1,CIITA,EIF2AK2,ROCK2,CMPK2,LYAR,CXCL8,OTUD4,TIFA,ACOD1,ENSSSCG00000009672,HMGB2,DDX60,P2RX7,OAS2,TRAFD1,OASL,IFIT2,IFIT1,IFIT5,NRP1,ENSSSCG00000011355,PDE12,PLSCR4,PARP14,DTX3L,NFKBIZ,MORC3,MX2,MX1,IRF7,UNC93B1,CDC42EP2,VWCE,SLC15A3,CFD,ICAM1,A…
8	response to external biotic stimulus	GO:0043207	GO:BP	1124	832	139	ENSSSCG00000000396,ENSSSCG00000000457,ENSSSCG00000000475,ENSSSCG00000000774,ENSSSCG00000001233,ENSSSCG00000001252,ENSSSCG00000001549,ENSSSCG00000001912,ENSSSCG00000001952,ENSSSCG00000002716,ENSSSCG00000002841,ENSSSCG00000003015,ENSSSCG00000003591,ENSSSCG00000003763,ENSSSCG00000003805,ENSSSCG00000004110,ENSSSCG00000004154,ENSSSCG00000005215,ENSSSCG00000005423,ENSSSCG00000005638,ENSSSCG00000006543,…	STAT2,USP15,IRAK3,USP18,TRIM26,UBD,FKBP5,PML,NFKBIA,MLKL,N4BP1,EXOSC5,PUM1,IFI44,PDE4B,TAB2,TNFAIP3,JAK2,ABCA1,LCN2,ADAR,MOV10,GBP2,IDO1,ZBP1,CIITA,EIF2AK2,CMPK2,LYAR,CXCL8,OTUD4,TIFA,ACOD1,ENSSSCG00000009672,HMGB2,DDX60,P2RX7,OAS2,TRAFD1,OASL,IFIT2,IFIT1,IFIT5,ENSSSCG00000011355,PDE12,PLSCR4,PARP14,DTX3L,NFKBIZ,MORC3,MX2,MX1,IRF7,UNC93B1,CDC42EP2,VWCE,SLC15A3,CFD,AP3B1,IRF1,CXCL14,ENSSSCG0000001…
9	response to external stimulus	GO:0009605	GO:BP	1949	832	192	ENSSSCG00000000006,ENSSSCG00000000396,ENSSSCG00000000457,ENSSSCG00000000475,ENSSSCG00000000753,ENSSSCG00000000774,ENSSSCG00000001233,ENSSSCG00000001252,ENSSSCG00000001549,ENSSSCG00000001710,ENSSSCG00000001909,ENSSSCG00000001912,ENSSSCG00000001952,ENSSSCG00000002716,ENSSSCG00000002841,ENSSSCG00000003015,ENSSSCG00000003591,ENSSSCG00000003669,ENSSSCG00000003713,ENSSSCG00000003763,ENSSSCG00000003805,…	PPARA,STAT2,USP15,IRAK3,WNK1,USP18,TRIM26,UBD,FKBP5,RUNX2,STRA6,PML,NFKBIA,MLKL,N4BP1,EXOSC5,PUM1,MFSD2A,IMPACT,IFI44,PDE4B,TAB2,TNFAIP3,THBS1,LGALS3,JAK2,ABCA1,TNC,LCN2,CCN3,ANGPT1,USF1,SLAMF1,ADAR,MOV10,VCAM1,GBP2,IDO1,PTGIS,ZBP1,ENSSSCG00000007678,CIITA,PPL,EIF2AK2,NCOA1,CMPK2,LYAR,CXCL8,CXCL2,CXCL11,OTUD4,TIFA,SPP1,ACOD1,MYCBP2,ENSSSCG00000009672,HMGB2,DDX60,P2RX7,OAS2,TRAFD1,OASL,FAS,IFIT2,I…
10	regulation of response to stimulus	GO:0048583	GO:BP	2967	832	251	ENSSSCG00000000006,ENSSSCG00000000197,ENSSSCG00000000206,ENSSSCG00000000396,ENSSSCG00000000457,ENSSSCG00000000475,ENSSSCG00000000623,ENSSSCG00000000753,ENSSSCG00000000774,ENSSSCG00000000932,ENSSSCG00000001252,ENSSSCG00000001341,ENSSSCG00000001394,ENSSSCG00000001453,ENSSSCG00000001523,ENSSSCG00000001595,ENSSSCG00000001710,ENSSSCG00000001727,ENSSSCG00000001912,ENSSSCG00000001952,ENSSSCG00000002283,…	PPARA,C1QL4,FAIM2,STAT2,USP15,IRAK3,BCL2L14,WNK1,USP18,NTS,UBD,ENSSSCG00000001341,ENSSSCG00000001394,HLA-DRA,GRM4,DAAM2,RUNX2,TNFRSF21,PML,NFKBIA,FUT8,OTUB2,NFAT5,SALL1,N4BP1,BBC3,PLEKHA4,MAD2L2,DHRS3,PUM1,HCRTR1,CELF4,PDE4B,TAB2,TNFAIP3,RSPO3,TPD52L1,SMAD7,THBS1,LGALS3,MLLT3,CD274,JAK2,ENTREP1,TLE4,ABCA1,TNC,TRAF1,CCN3,ANGPT1,FZD6,SDCBP,GPR161,SLAMF1,NTRK1,ADAR,CTSS,HIPK1,IDO1,PLAGL2,PTGIS,ZBP1,…
11	immune response	GO:0006955	GO:BP	1292	832	146	ENSSSCG00000000396,ENSSSCG00000000457,ENSSSCG00000000475,ENSSSCG00000000753,ENSSSCG00000000774,ENSSSCG00000001233,ENSSSCG00000001252,ENSSSCG00000001341,ENSSSCG00000001394,ENSSSCG00000001453,ENSSSCG00000001727,ENSSSCG00000001912,ENSSSCG00000001952,ENSSSCG00000002841,ENSSSCG00000003419,ENSSSCG00000003591,ENSSSCG00000003763,ENSSSCG00000003805,ENSSSCG00000004154,ENSSSCG00000004507,ENSSSCG00000004687,…	STAT2,USP15,IRAK3,WNK1,USP18,TRIM26,UBD,ENSSSCG00000001341,ENSSSCG00000001394,HLA-DRA,TNFRSF21,PML,NFKBIA,N4BP1,MAD2L2,PUM1,IFI44,PDE4B,TNFAIP3,SMAD7,ENSSSCG00000004687,THBS1,CD274,JAK2,ANGPT1,SLAMF1,ADAR,CTSS,IDO1,ZBP1,CIITA,EIF2AK2,LYAR,TEC,CXCL8,CXCL2,CXCL11,OTUD4,TIFA,ACOD1,TNFSF13B,ENSSSCG00000009672,HMGB2,DDX60,P2RX7,OAS2,TRAFD1,OASL,UNG,FAS,IFIT2,IFIT1,BLNK,ENTPD7,NFKB2,DENND1B,ENSSSCG0000…
12	immune system process	GO:0002376	GO:BP	1924	832	187	ENSSSCG00000000217,ENSSSCG00000000396,ENSSSCG00000000457,ENSSSCG00000000475,ENSSSCG00000000753,ENSSSCG00000000774,ENSSSCG00000001233,ENSSSCG00000001252,ENSSSCG00000001341,ENSSSCG00000001394,ENSSSCG00000001453,ENSSSCG00000001507,ENSSSCG00000001710,ENSSSCG00000001727,ENSSSCG00000001912,ENSSSCG00000001952,ENSSSCG00000001971,ENSSSCG00000002002,ENSSSCG00000002841,ENSSSCG00000003419,ENSSSCG00000003591,…	RACGAP1,STAT2,USP15,IRAK3,WNK1,USP18,TRIM26,UBD,ENSSSCG00000001341,ENSSSCG00000001394,HLA-DRA,TAPBP,RUNX2,TNFRSF21,PML,NFKBIA,HECTD1,IRF9,N4BP1,MAD2L2,PUM1,IFI44,PDE4B,TNFAIP3,SMAD7,ENSSSCG00000004687,THBS1,LGALS3,CD274,JAK2,CCN3,ANGPT1,SELP,SLAMF7,SLAMF1,NTRK1,ADAR,CTSS,VCAM1,IDO1,ZNF335,ZBP1,CIITA,EIF2AK2,LYAR,TEC,CXCL8,CXCL2,CXCL11,OTUD4,TIFA,ACOD1,TNFSF13B,ENSSSCG00000009672,HMGB2,DDX60,P2RX7…
13	defense response to other organism	GO:0098542	GO:BP	896	832	116	ENSSSCG00000000396,ENSSSCG00000000457,ENSSSCG00000000475,ENSSSCG00000000774,ENSSSCG00000001233,ENSSSCG00000001252,ENSSSCG00000001912,ENSSSCG00000001952,ENSSSCG00000002716,ENSSSCG00000002841,ENSSSCG00000003015,ENSSSCG00000003591,ENSSSCG00000004154,ENSSSCG00000005215,ENSSSCG00000005638,ENSSSCG00000006543,ENSSSCG00000006776,ENSSSCG00000006923,ENSSSCG00000007508,ENSSSCG00000007901,ENSSSCG00000008496,…	STAT2,USP15,IRAK3,USP18,TRIM26,UBD,PML,NFKBIA,MLKL,N4BP1,EXOSC5,PUM1,TNFAIP3,JAK2,LCN2,ADAR,MOV10,GBP2,ZBP1,CIITA,EIF2AK2,LYAR,CXCL8,OTUD4,TIFA,ACOD1,ENSSSCG00000009672,HMGB2,DDX60,P2RX7,OAS2,TRAFD1,OASL,IFIT2,IFIT1,IFIT5,ENSSSCG00000011355,PDE12,PARP14,DTX3L,NFKBIZ,MORC3,MX2,MX1,IRF7,UNC93B1,CDC42EP2,SLC15A3,CFD,AP3B1,IRF1,CXCL14,ENSSSCG00000014670,TRIM68,TRIM21,IL18,RNASEL,KYNU,IRF2,IFIH1,STAT1…
14	defense response to symbiont	GO:0140546	GO:BP	249	832	57	ENSSSCG00000000396,ENSSSCG00000000774,ENSSSCG00000001233,ENSSSCG00000001912,ENSSSCG00000002716,ENSSSCG00000003015,ENSSSCG00000004154,ENSSSCG00000006543,ENSSSCG00000006776,ENSSSCG00000007508,ENSSSCG00000008496,ENSSSCG00000009720,ENSSSCG00000009881,ENSSSCG00000009921,ENSSSCG00000010451,ENSSSCG00000010452,ENSSSCG00000010454,ENSSSCG00000011465,ENSSSCG00000011876,ENSSSCG00000012055,ENSSSCG00000012076,…	STAT2,USP18,TRIM26,PML,MLKL,EXOSC5,TNFAIP3,ADAR,MOV10,ZBP1,EIF2AK2,DDX60,OAS2,OASL,IFIT2,IFIT1,IFIT5,PDE12,DTX3L,MORC3,MX2,MX1,IRF7,IRF1,TRIM21,RNASEL,IRF2,IFIH1,STAT1,DHX58,TRIM25,IL6,CGAS,TICAM1,ISG20,IFI44L,PARP9,SAMHD1,ZNFX1,HERC5,CXCL10,ENSSSCG00000032652,CXCL9,BST2,TRIM56,IFI6,C1QBP,PLSCR1,RAB7B,ZC3H12A,TRAF6,ENSSSCG00000038912,IL27,NLRC5,FBXL2,ISG15,OAS1
15	defense response to virus	GO:0051607	GO:BP	249	832	57	ENSSSCG00000000396,ENSSSCG00000000774,ENSSSCG00000001233,ENSSSCG00000001912,ENSSSCG00000002716,ENSSSCG00000003015,ENSSSCG00000004154,ENSSSCG00000006543,ENSSSCG00000006776,ENSSSCG00000007508,ENSSSCG00000008496,ENSSSCG00000009720,ENSSSCG00000009881,ENSSSCG00000009921,ENSSSCG00000010451,ENSSSCG00000010452,ENSSSCG00000010454,ENSSSCG00000011465,ENSSSCG00000011876,ENSSSCG00000012055,ENSSSCG00000012076,…	STAT2,USP18,TRIM26,PML,MLKL,EXOSC5,TNFAIP3,ADAR,MOV10,ZBP1,EIF2AK2,DDX60,OAS2,OASL,IFIT2,IFIT1,IFIT5,PDE12,DTX3L,MORC3,MX2,MX1,IRF7,IRF1,TRIM21,RNASEL,IRF2,IFIH1,STAT1,DHX58,TRIM25,IL6,CGAS,TICAM1,ISG20,IFI44L,PARP9,SAMHD1,ZNFX1,HERC5,CXCL10,ENSSSCG00000032652,CXCL9,BST2,TRIM56,IFI6,C1QBP,PLSCR1,RAB7B,ZC3H12A,TRAF6,ENSSSCG00000038912,IL27,NLRC5,FBXL2,ISG15,OAS1
16	response to virus	GO:0009615	GO:BP	313	832	63	ENSSSCG00000000396,ENSSSCG00000000774,ENSSSCG00000001233,ENSSSCG00000001912,ENSSSCG00000002716,ENSSSCG00000003015,ENSSSCG00000004154,ENSSSCG00000006543,ENSSSCG00000006776,ENSSSCG00000007508,ENSSSCG00000008496,ENSSSCG00000009720,ENSSSCG00000009881,ENSSSCG00000009921,ENSSSCG00000010451,ENSSSCG00000010452,ENSSSCG00000010454,ENSSSCG00000011465,ENSSSCG00000011876,ENSSSCG00000012055,ENSSSCG00000012076,…	STAT2,USP18,TRIM26,PML,MLKL,EXOSC5,TNFAIP3,ADAR,MOV10,ZBP1,EIF2AK2,DDX60,OAS2,OASL,IFIT2,IFIT1,IFIT5,PDE12,DTX3L,MORC3,MX2,MX1,IRF7,VWCE,IRF1,TRIM21,RNASEL,IRF2,IFIH1,STAT1,ZC3HAV1,DHX58,TBX21,TRIM25,IL6,CGAS,NMI,TICAM1,ISG20,IFI44L,PARP9,SAMHD1,PIM2,ZNFX1,HERC5,CXCL10,ENSSSCG00000032652,CXCL9,BST2,TRIM56,IFI6,C1QBP,PLSCR1,RAB7B,ZC3H12A,TRAF6,ENSSSCG00000038912,IL27,PSMA2,NLRC5,FBXL2,ISG15,OAS1
17	regulation of signal transduction	GO:0009966	GO:BP	2272	832	199	ENSSSCG00000000006,ENSSSCG00000000197,ENSSSCG00000000206,ENSSSCG00000000396,ENSSSCG00000000457,ENSSSCG00000000475,ENSSSCG00000000623,ENSSSCG00000000753,ENSSSCG00000000774,ENSSSCG00000000932,ENSSSCG00000001252,ENSSSCG00000001523,ENSSSCG00000001595,ENSSSCG00000001710,ENSSSCG00000001912,ENSSSCG00000001952,ENSSSCG00000002755,ENSSSCG00000002836,ENSSSCG00000003112,ENSSSCG00000003137,ENSSSCG00000003419,…	PPARA,C1QL4,FAIM2,STAT2,USP15,IRAK3,BCL2L14,WNK1,USP18,NTS,UBD,GRM4,DAAM2,RUNX2,PML,NFKBIA,NFAT5,SALL1,BBC3,PLEKHA4,MAD2L2,DHRS3,PUM1,HCRTR1,CELF4,PDE4B,TAB2,TNFAIP3,RSPO3,TPD52L1,SMAD7,THBS1,LGALS3,MLLT3,JAK2,ENTREP1,TLE4,ABCA1,TRAF1,CCN3,ANGPT1,FZD6,SDCBP,GPR161,SLAMF1,NTRK1,ADAR,CTSS,HIPK1,PLAGL2,PTGIS,ZBP1,MLST8,ADRA2B,ENSSSCG00000008147,RNF149,SPRED2,USP34,REL,EIF2AK2,NCOA1,ADRA2C,HTRA3,RASL…
18	cellular response to chemical stimulus	GO:0070887	GO:BP	1984	832	178	ENSSSCG00000000006,ENSSSCG00000000061,ENSSSCG00000000396,ENSSSCG00000000457,ENSSSCG00000000475,ENSSSCG00000000625,ENSSSCG00000000661,ENSSSCG00000000753,ENSSSCG00000000774,ENSSSCG00000001509,ENSSSCG00000001567,ENSSSCG00000001710,ENSSSCG00000001727,ENSSSCG00000001750,ENSSSCG00000001906,ENSSSCG00000001912,ENSSSCG00000001920,ENSSSCG00000001952,ENSSSCG00000002283,ENSSSCG00000002755,ENSSSCG00000003112,…	PPARA,PMM1,STAT2,USP15,IRAK3,LRP6,PHC1,WNK1,USP18,DAXX,CPNE5,RUNX2,TNFRSF21,PAQR8,CYP1A1,PML,HCN4,NFKBIA,FUT8,NFAT5,BBC3,HCRTR1,PDE4B,TNFAIP3,SMAD7,THBS1,LGALS3,JAK2,ENTREP1,NR4A3,ABCA1,TRAF1,SETX,CCN3,ANGPT1,RCSD1,USF1,SLAMF1,ADAR,CTSS,HIPK1,VCAM1,PTGIS,ZBP1,RNF149,EIF2AK2,NCOA1,ROCK2,CMPK2,CXCL8,CXCL2,CXCL11,OTUD4,SPP1,ACOD1,TNFSF13B,HMGB2,P2RX7,OAS2,ACTN2,RET,AIFM2,FAS,IFIT1,NEURL1,ADRA2A,NRP1…
19	regulation of cell communication	GO:0010646	GO:BP	2597	832	213	ENSSSCG00000000006,ENSSSCG00000000197,ENSSSCG00000000206,ENSSSCG00000000396,ENSSSCG00000000457,ENSSSCG00000000475,ENSSSCG00000000623,ENSSSCG00000000753,ENSSSCG00000000774,ENSSSCG00000000932,ENSSSCG00000001252,ENSSSCG00000001523,ENSSSCG00000001595,ENSSSCG00000001710,ENSSSCG00000001912,ENSSSCG00000001952,ENSSSCG00000002755,ENSSSCG00000002836,ENSSSCG00000003112,ENSSSCG00000003137,ENSSSCG00000003419,…	PPARA,C1QL4,FAIM2,STAT2,USP15,IRAK3,BCL2L14,WNK1,USP18,NTS,UBD,GRM4,DAAM2,RUNX2,PML,NFKBIA,NFAT5,SALL1,BBC3,PLEKHA4,MAD2L2,DHRS3,PUM1,HCRTR1,CELF4,PDE4B,TAB2,TNFAIP3,RSPO3,TPD52L1,SMAD7,THBS1,LGALS3,MLLT3,SLC24A2,JAK2,ENTREP1,TLE4,ABCA1,TRAF1,CCN3,ANGPT1,FZD6,SDCBP,GPR161,SLAMF1,NTRK1,ADAR,CTSS,HIPK1,PLAGL2,PTGIS,ZBP1,MLST8,ADRA2B,ENSSSCG00000008147,RNF149,SPRED2,USP34,REL,EIF2AK2,NCOA1,ADRA2C,HT…
20	regulation of signaling	GO:0023051	GO:BP	2601	832	213	ENSSSCG00000000006,ENSSSCG00000000197,ENSSSCG00000000206,ENSSSCG00000000396,ENSSSCG00000000457,ENSSSCG00000000475,ENSSSCG00000000623,ENSSSCG00000000753,ENSSSCG00000000774,ENSSSCG00000000932,ENSSSCG00000001252,ENSSSCG00000001523,ENSSSCG00000001595,ENSSSCG00000001710,ENSSSCG00000001912,ENSSSCG00000001952,ENSSSCG00000002755,ENSSSCG00000002836,ENSSSCG00000003112,ENSSSCG00000003137,ENSSSCG00000003419,…	PPARA,C1QL4,FAIM2,STAT2,USP15,IRAK3,BCL2L14,WNK1,USP18,NTS,UBD,GRM4,DAAM2,RUNX2,PML,NFKBIA,NFAT5,SALL1,BBC3,PLEKHA4,MAD2L2,DHRS3,PUM1,HCRTR1,CELF4,PDE4B,TAB2,TNFAIP3,RSPO3,TPD52L1,SMAD7,THBS1,LGALS3,MLLT3,SLC24A2,JAK2,ENTREP1,TLE4,ABCA1,TRAF1,CCN3,ANGPT1,FZD6,SDCBP,GPR161,SLAMF1,NTRK1,ADAR,CTSS,HIPK1,PLAGL2,PTGIS,ZBP1,MLST8,ADRA2B,ENSSSCG00000008147,RNF149,SPRED2,USP34,REL,EIF2AK2,NCOA1,ADRA2C,HT…
21	biological regulation	GO:0065007	GO:BP	11481	832	625	ENSSSCG00000000006,ENSSSCG00000000078,ENSSSCG00000000135,ENSSSCG00000000186,ENSSSCG00000000197,ENSSSCG00000000206,ENSSSCG00000000217,ENSSSCG00000000396,ENSSSCG00000000457,ENSSSCG00000000475,ENSSSCG00000000523,ENSSSCG00000000623,ENSSSCG00000000625,ENSSSCG00000000700,ENSSSCG00000000753,ENSSSCG00000000774,ENSSSCG00000000932,ENSSSCG00000000950,ENSSSCG00000001233,ENSSSCG00000001252,ENSSSCG00000001341,…	PPARA,TNRC6B,KCTD17,RHEBL1,C1QL4,FAIM2,RACGAP1,STAT2,USP15,IRAK3,BBS10,BCL2L14,LRP6,ACRBP,WNK1,USP18,NTS,E2F7,TRIM26,UBD,ENSSSCG00000001341,DDR1,ENSSSCG00000001394,HLA-DRA,PSMB9,TAPBP,DAXX,ENSSSCG00000001516,GRM4,ETV7,CPNE5,DAAM2,ZNF318,RUNX2,TNFRSF21,PAQR8,PEAK1,CYP1A1,STRA6,PML,HCN4,NFKBIA,BAZ1A,HECTD1,IRF9,SLCO3A1,FUT8,ZFYVE26,RIOX1,OTUB2,PPP4R4,WARS1,TUBB3,ATP2C2,MLKL,NFAT5,SALL1,N4BP1,EXOSC5…
22	positive regulation of metabolic process	GO:0009893	GO:BP	3004	832	235	ENSSSCG00000000006,ENSSSCG00000000078,ENSSSCG00000000396,ENSSSCG00000000475,ENSSSCG00000000625,ENSSSCG00000000700,ENSSSCG00000000932,ENSSSCG00000000950,ENSSSCG00000001509,ENSSSCG00000001667,ENSSSCG00000001710,ENSSSCG00000001912,ENSSSCG00000001952,ENSSSCG00000001958,ENSSSCG00000002002,ENSSSCG00000002263,ENSSSCG00000002516,ENSSSCG00000002755,ENSSSCG00000002836,ENSSSCG00000003015,ENSSSCG00000003112,…	PPARA,TNRC6B,STAT2,IRAK3,LRP6,ACRBP,NTS,E2F7,DAXX,ZNF318,RUNX2,PML,NFKBIA,BAZ1A,IRF9,SLCO3A1,WARS1,NFAT5,SALL1,EXOSC5,BBC3,MED25,MAD2L2,PUM1,MFSD2A,IMPACT,CELF4,PDE4B,DOCK7,MOB3C,ENSSSCG00000003989,TAB2,TNFAIP3,TPD52L1,SMAD7,ZNF609,GATM,THBS1,ZNF516,MLLT3,CD274,JAK2,RORB,NR4A3,TNC,SETX,AGO2,ATAD2,ANGPT1,SDCBP,DDR2,UHMK1,USF1,SLAMF1,NTRK1,ADAR,CTSS,BCL9,MOV10,IDO1,PLAGL2,PHF20,NFATC2IP,DCUN1D3,CII…
23	regulation of biological process	GO:0050789	GO:BP	11125	832	610	ENSSSCG00000000006,ENSSSCG00000000078,ENSSSCG00000000135,ENSSSCG00000000186,ENSSSCG00000000197,ENSSSCG00000000206,ENSSSCG00000000217,ENSSSCG00000000396,ENSSSCG00000000457,ENSSSCG00000000475,ENSSSCG00000000523,ENSSSCG00000000623,ENSSSCG00000000625,ENSSSCG00000000700,ENSSSCG00000000753,ENSSSCG00000000774,ENSSSCG00000000932,ENSSSCG00000000950,ENSSSCG00000001233,ENSSSCG00000001252,ENSSSCG00000001341,…	PPARA,TNRC6B,KCTD17,RHEBL1,C1QL4,FAIM2,RACGAP1,STAT2,USP15,IRAK3,BBS10,BCL2L14,LRP6,ACRBP,WNK1,USP18,NTS,E2F7,TRIM26,UBD,ENSSSCG00000001341,DDR1,ENSSSCG00000001394,HLA-DRA,PSMB9,TAPBP,DAXX,ENSSSCG00000001516,GRM4,ETV7,CPNE5,DAAM2,ZNF318,RUNX2,TNFRSF21,PAQR8,PEAK1,STRA6,PML,HCN4,NFKBIA,BAZ1A,HECTD1,IRF9,SLCO3A1,FUT8,ZFYVE26,RIOX1,OTUB2,PPP4R4,WARS1,TUBB3,ATP2C2,MLKL,NFAT5,SALL1,N4BP1,EXOSC5,BBC3,P…
24	innate immune response	GO:0045087	GO:BP	659	832	87	ENSSSCG00000000396,ENSSSCG00000000457,ENSSSCG00000000475,ENSSSCG00000000774,ENSSSCG00000001233,ENSSSCG00000001252,ENSSSCG00000001912,ENSSSCG00000001952,ENSSSCG00000002841,ENSSSCG00000003591,ENSSSCG00000004154,ENSSSCG00000005215,ENSSSCG00000006543,ENSSSCG00000007508,ENSSSCG00000007901,ENSSSCG00000008496,ENSSSCG00000008729,ENSSSCG00000009042,ENSSSCG00000009129,ENSSSCG00000009672,ENSSSCG00000009704,…	STAT2,USP15,IRAK3,USP18,TRIM26,UBD,PML,NFKBIA,N4BP1,PUM1,TNFAIP3,JAK2,ADAR,ZBP1,CIITA,EIF2AK2,LYAR,OTUD4,TIFA,ENSSSCG00000009672,HMGB2,DDX60,OAS2,TRAFD1,OASL,IFIT2,IFIT1,ENSSSCG00000011355,PDE12,PARP14,NFKBIZ,MORC3,MX1,IRF7,UNC93B1,CDC42EP2,SLC15A3,CFD,AP3B1,IRF1,ENSSSCG00000014670,TRIM68,TRIM21,IL18,KYNU,IFIH1,STAT1,COL4A4,NUB1,DHX58,TRIM25,CGAS,NMI,TIRAP,RAB20,FCN2,UBE2L6,RIPK2,TICAM1,GBP1,RNF1…
25	negative regulation of biological process	GO:0048519	GO:BP	4385	832	305	ENSSSCG00000000006,ENSSSCG00000000078,ENSSSCG00000000197,ENSSSCG00000000206,ENSSSCG00000000396,ENSSSCG00000000457,ENSSSCG00000000475,ENSSSCG00000000625,ENSSSCG00000000753,ENSSSCG00000000774,ENSSSCG00000000932,ENSSSCG00000000950,ENSSSCG00000001233,ENSSSCG00000001382,ENSSSCG00000001509,ENSSSCG00000001561,ENSSSCG00000001595,ENSSSCG00000001667,ENSSSCG00000001710,ENSSSCG00000001727,ENSSSCG00000001912,…	PPARA,TNRC6B,C1QL4,FAIM2,STAT2,USP15,IRAK3,LRP6,WNK1,USP18,NTS,E2F7,TRIM26,DDR1,DAXX,ETV7,DAAM2,ZNF318,RUNX2,TNFRSF21,PML,NFKBIA,BAZ1A,HECTD1,RIOX1,OTUB2,PPP4R4,WARS1,SALL1,N4BP1,EXOSC5,BBC3,MED25,ZNF614,MAD2L2,MIIP,DHRS3,UBR4,PUM1,MFSD2A,IMPACT,CELF4,PTGER3,PDE4B,TACSTD2,TNFAIP3,ADGRB3,SMAD7,TTBK2,THBS1,LGALS3,MLLT3,SLC24A2,CD274,JAK2,ENTREP1,RORB,TLE4,SETX,AGO2,CCN3,ANGPT1,FZD6,SDCBP,GPR161,SLA…
26	positive regulation of macromolecule metabolic process	GO:0010604	GO:BP	2766	832	219	ENSSSCG00000000006,ENSSSCG00000000078,ENSSSCG00000000396,ENSSSCG00000000475,ENSSSCG00000000625,ENSSSCG00000000700,ENSSSCG00000000932,ENSSSCG00000000950,ENSSSCG00000001509,ENSSSCG00000001667,ENSSSCG00000001710,ENSSSCG00000001912,ENSSSCG00000001952,ENSSSCG00000001958,ENSSSCG00000002002,ENSSSCG00000002263,ENSSSCG00000002516,ENSSSCG00000002755,ENSSSCG00000002836,ENSSSCG00000003015,ENSSSCG00000003112,…	PPARA,TNRC6B,STAT2,IRAK3,LRP6,ACRBP,NTS,E2F7,DAXX,ZNF318,RUNX2,PML,NFKBIA,BAZ1A,IRF9,SLCO3A1,WARS1,NFAT5,SALL1,EXOSC5,BBC3,MED25,MAD2L2,PUM1,IMPACT,CELF4,PDE4B,DOCK7,MOB3C,ENSSSCG00000003989,TAB2,TNFAIP3,TPD52L1,SMAD7,ZNF609,THBS1,ZNF516,MLLT3,CD274,JAK2,RORB,NR4A3,TNC,SETX,AGO2,ATAD2,ANGPT1,DDR2,UHMK1,USF1,SLAMF1,ADAR,CTSS,BCL9,MOV10,IDO1,PLAGL2,PHF20,NFATC2IP,DCUN1D3,CIITA,MLST8,ADRA2B,TET3,REL…
27	positive regulation of response to stimulus	GO:0048584	GO:BP	1649	832	152	ENSSSCG00000000457,ENSSSCG00000000475,ENSSSCG00000000753,ENSSSCG00000000932,ENSSSCG00000001252,ENSSSCG00000001341,ENSSSCG00000001394,ENSSSCG00000001453,ENSSSCG00000001523,ENSSSCG00000001595,ENSSSCG00000001727,ENSSSCG00000001912,ENSSSCG00000001952,ENSSSCG00000002755,ENSSSCG00000002836,ENSSSCG00000003112,ENSSSCG00000003137,ENSSSCG00000003419,ENSSSCG00000003591,ENSSSCG00000003601,ENSSSCG00000003805,…	USP15,IRAK3,WNK1,NTS,UBD,ENSSSCG00000001341,ENSSSCG00000001394,HLA-DRA,GRM4,DAAM2,TNFRSF21,PML,NFKBIA,NFAT5,SALL1,BBC3,PLEKHA4,MAD2L2,PUM1,HCRTR1,PDE4B,TAB2,TNFAIP3,RSPO3,TPD52L1,THBS1,MLLT3,CD274,JAK2,TRAF1,CCN3,ANGPT1,SDCBP,SLAMF1,NTRK1,CTSS,IDO1,PLAGL2,PTGIS,ZBP1,MLST8,ADRA2B,USP34,REL,EIF2AK2,ADRA2C,TEC,CXCL8,OTUD4,TIFA,ACOD1,TNFSF13B,HMGB2,DDX60,P2RX7,RET,FAS,IFIT5,BLNK,ADRA2A,DENND1B,BAMBI,…
28	positive regulation of cellular metabolic process	GO:0031325	GO:BP	2691	832	213	ENSSSCG00000000006,ENSSSCG00000000078,ENSSSCG00000000396,ENSSSCG00000000475,ENSSSCG00000000625,ENSSSCG00000000700,ENSSSCG00000000932,ENSSSCG00000000950,ENSSSCG00000001509,ENSSSCG00000001667,ENSSSCG00000001710,ENSSSCG00000001912,ENSSSCG00000001952,ENSSSCG00000001958,ENSSSCG00000002002,ENSSSCG00000002263,ENSSSCG00000002516,ENSSSCG00000002755,ENSSSCG00000002836,ENSSSCG00000003015,ENSSSCG00000003197,…	PPARA,TNRC6B,STAT2,IRAK3,LRP6,ACRBP,NTS,E2F7,DAXX,ZNF318,RUNX2,PML,NFKBIA,BAZ1A,IRF9,SLCO3A1,WARS1,NFAT5,SALL1,EXOSC5,MED25,MAD2L2,PUM1,MFSD2A,IMPACT,CELF4,PDE4B,DOCK7,MOB3C,ENSSSCG00000003989,TAB2,TPD52L1,ZNF609,THBS1,ZNF516,MLLT3,CD274,JAK2,RORB,NR4A3,TNC,SETX,AGO2,ATAD2,ANGPT1,SDCBP,DDR2,UHMK1,USF1,SLAMF1,NTRK1,ADAR,BCL9,MOV10,IDO1,PLAGL2,NFATC2IP,CIITA,MLST8,ADRA2B,TET3,REL,EIF2AK2,NCOA1,NBAS…
29	regulation of primary metabolic process	GO:0080090	GO:BP	4657	832	315	ENSSSCG00000000006,ENSSSCG00000000078,ENSSSCG00000000186,ENSSSCG00000000396,ENSSSCG00000000475,ENSSSCG00000000625,ENSSSCG00000000700,ENSSSCG00000000932,ENSSSCG00000000950,ENSSSCG00000001233,ENSSSCG00000001463,ENSSSCG00000001509,ENSSSCG00000001561,ENSSSCG00000001667,ENSSSCG00000001710,ENSSSCG00000001912,ENSSSCG00000001952,ENSSSCG00000001958,ENSSSCG00000002002,ENSSSCG00000002263,ENSSSCG00000002344,…	PPARA,TNRC6B,RHEBL1,STAT2,IRAK3,LRP6,ACRBP,NTS,E2F7,TRIM26,PSMB9,DAXX,ETV7,ZNF318,RUNX2,PML,NFKBIA,BAZ1A,IRF9,SLCO3A1,RIOX1,OTUB2,PPP4R4,WARS1,NFAT5,SALL1,N4BP1,EXOSC5,BBC3,MED25,ZNF614,MAD2L2,UBR4,PUM1,MFSD2A,RLF,IMPACT,CELF4,DOCK7,MOB3C,ENSSSCG00000003989,TAB2,HIVEP2,TNFAIP3,TPD52L1,SMAD7,LIPG,ZNF609,LACTB,THBS1,ZNF516,MLLT3,JAK2,RORB,TLE4,NR4A3,TRAF1,SETX,AGO2,ATAD2,ANGPT1,FZD6,ZFHX4,SDCBP,DDR…
30	cell surface receptor signaling pathway	GO:0007166	GO:BP	2181	832	182	ENSSSCG00000000006,ENSSSCG00000000206,ENSSSCG00000000396,ENSSSCG00000000457,ENSSSCG00000000475,ENSSSCG00000000623,ENSSSCG00000000625,ENSSSCG00000000753,ENSSSCG00000000774,ENSSSCG00000001382,ENSSSCG00000001509,ENSSSCG00000001516,ENSSSCG00000001523,ENSSSCG00000001595,ENSSSCG00000001710,ENSSSCG00000001727,ENSSSCG00000001912,ENSSSCG00000001952,ENSSSCG00000002283,ENSSSCG00000002639,ENSSSCG00000002716,…	PPARA,FAIM2,STAT2,USP15,IRAK3,BCL2L14,LRP6,WNK1,USP18,DDR1,DAXX,ENSSSCG00000001516,GRM4,DAAM2,RUNX2,TNFRSF21,PML,NFKBIA,FUT8,TUBB3,MLKL,SALL1,PLEKHA4,MAD2L2,NPPB,CELF4,PDE4B,TNFAIP3,RSPO3,ADGRB3,SMAD7,THBS1,LGALS3,MLLT3,CD274,JAK2,ENTREP1,TLE4,NR4A3,TRAF1,SETX,CCN3,ANGPT1,FZD6,SDCBP,GPR161,DDR2,SLAMF1,NTRK1,ADAR,BCL9,HIPK1,ZBP1,USP34,EFEMP1,STRN,HTRA3,TEC,RASL11B,CXCL8,BTC,CXCL11,OTUD4,HHIP,JADE1…
31	response to cytokine	GO:0034097	GO:BP	713	832	87	ENSSSCG00000000061,ENSSSCG00000000396,ENSSSCG00000000475,ENSSSCG00000000661,ENSSSCG00000000753,ENSSSCG00000000774,ENSSSCG00000001252,ENSSSCG00000001727,ENSSSCG00000001912,ENSSSCG00000001952,ENSSSCG00000002755,ENSSSCG00000004507,ENSSSCG00000005211,ENSSSCG00000005215,ENSSSCG00000005249,ENSSSCG00000005511,ENSSSCG00000006035,ENSSSCG00000006543,ENSSSCG00000006760,ENSSSCG00000007463,ENSSSCG00000007508,…	PMM1,STAT2,IRAK3,PHC1,WNK1,USP18,UBD,TNFRSF21,PML,NFKBIA,NFAT5,SMAD7,CD274,JAK2,ENTREP1,TRAF1,ANGPT1,ADAR,HIPK1,PTGIS,ZBP1,CIITA,EIF2AK2,CXCL8,CXCL11,OTUD4,TNFSF13B,OAS2,IFIT1,PDE12,PARP14,NFKBIZ,MX2,MX1,TIMP1,IRF7,CDC42EP2,ICAM1,IRF1,TRIM21,IL18,TNFSF18,KYNU,IFIH1,STAT1,ATIC,NUB1,LIFR,IL31RA,CCR7,CSF3,TRIM25,IL6,STIP1,RAB20,SLC2A4,RIPK2,MT3,SIGIRR,CX3CL1,GBP1,RNMT,PARP9,SAMHD1,SOCS1,CCL4,CXCL10,…
32	response to stimulus	GO:0050896	GO:BP	8159	832	477	ENSSSCG00000000006,ENSSSCG00000000061,ENSSSCG00000000186,ENSSSCG00000000197,ENSSSCG00000000206,ENSSSCG00000000217,ENSSSCG00000000396,ENSSSCG00000000457,ENSSSCG00000000475,ENSSSCG00000000623,ENSSSCG00000000625,ENSSSCG00000000661,ENSSSCG00000000753,ENSSSCG00000000774,ENSSSCG00000000932,ENSSSCG00000000950,ENSSSCG00000001233,ENSSSCG00000001252,ENSSSCG00000001341,ENSSSCG00000001382,ENSSSCG00000001394,…	PPARA,PMM1,RHEBL1,C1QL4,FAIM2,RACGAP1,STAT2,USP15,IRAK3,BCL2L14,LRP6,PHC1,WNK1,USP18,NTS,E2F7,TRIM26,UBD,ENSSSCG00000001341,DDR1,ENSSSCG00000001394,HLA-DRA,DAXX,ENSSSCG00000001516,GRM4,FKBP5,CPNE5,DAAM2,RUNX2,TNFRSF21,PAQR8,CYP1A1,STRA6,PML,HCN4,NFKBIA,FUT8,ZFYVE26,SUSD6,OTUB2,TUBB3,MLKL,NFAT5,SALL1,N4BP1,EXOSC5,BBC3,PLEKHA4,MAD2L2,NPPB,DHRS3,PUM1,HCRTR1,MFSD2A,IMPACT,CELF4,IFI44,PTGER3,PDE4B,DOC…
33	regulation of nitrogen compound metabolic process	GO:0051171	GO:BP	4518	832	306	ENSSSCG00000000006,ENSSSCG00000000078,ENSSSCG00000000186,ENSSSCG00000000396,ENSSSCG00000000475,ENSSSCG00000000625,ENSSSCG00000000700,ENSSSCG00000000932,ENSSSCG00000000950,ENSSSCG00000001233,ENSSSCG00000001463,ENSSSCG00000001509,ENSSSCG00000001561,ENSSSCG00000001667,ENSSSCG00000001710,ENSSSCG00000001912,ENSSSCG00000001952,ENSSSCG00000001958,ENSSSCG00000002002,ENSSSCG00000002263,ENSSSCG00000002344,…	PPARA,TNRC6B,RHEBL1,STAT2,IRAK3,LRP6,ACRBP,NTS,E2F7,TRIM26,PSMB9,DAXX,ETV7,ZNF318,RUNX2,PML,NFKBIA,BAZ1A,IRF9,SLCO3A1,RIOX1,OTUB2,PPP4R4,WARS1,NFAT5,SALL1,N4BP1,EXOSC5,BBC3,MED25,ZNF614,MAD2L2,PUM1,MFSD2A,RLF,IMPACT,CELF4,DOCK7,MOB3C,ENSSSCG00000003989,TAB2,HIVEP2,TNFAIP3,TPD52L1,SMAD7,LIPG,ZNF609,THBS1,ZNF516,MLLT3,JAK2,RORB,TLE4,NR4A3,TRAF1,SETX,AGO2,ATAD2,ANGPT1,FZD6,ZFHX4,SDCBP,DDR2,UHMK1,USF…
34	intracellular signal transduction	GO:0035556	GO:BP	2025	832	170	ENSSSCG00000000006,ENSSSCG00000000186,ENSSSCG00000000197,ENSSSCG00000000217,ENSSSCG00000000457,ENSSSCG00000000475,ENSSSCG00000000753,ENSSSCG00000000932,ENSSSCG00000000950,ENSSSCG00000001252,ENSSSCG00000001509,ENSSSCG00000001516,ENSSSCG00000001523,ENSSSCG00000001710,ENSSSCG00000001912,ENSSSCG00000001952,ENSSSCG00000002755,ENSSSCG00000003112,ENSSSCG00000003419,ENSSSCG00000003431,ENSSSCG00000003601,…	PPARA,RHEBL1,C1QL4,RACGAP1,USP15,IRAK3,WNK1,NTS,E2F7,UBD,DAXX,ENSSSCG00000001516,GRM4,RUNX2,PML,NFKBIA,NFAT5,BBC3,MAD2L2,NPPB,HCRTR1,IMPACT,DOCK7,TAB2,TNFAIP3,TPD52L1,SMAD7,MAPK6,THBS1,JAK2,ABCA1,TRAF1,SETX,CCN3,ANGPT1,SDCBP,SELP,SLAMF1,NTRK1,HIPK1,VCAM1,PLAGL2,MLST8,ADRA2B,ENSSSCG00000008147,RNF149,SPRED2,REL,EIF2AK2,ROCK2,ADRA2C,TEC,RAPGEF2,CXCL8,TIFA,ARHGAP24,P2RX7,RET,FAS,IFIT5,BLNK,NFKB2,ADR…
35	regulation of metabolic process	GO:0019222	GO:BP	5626	832	358	ENSSSCG00000000006,ENSSSCG00000000078,ENSSSCG00000000186,ENSSSCG00000000396,ENSSSCG00000000475,ENSSSCG00000000625,ENSSSCG00000000700,ENSSSCG00000000932,ENSSSCG00000000950,ENSSSCG00000001233,ENSSSCG00000001463,ENSSSCG00000001507,ENSSSCG00000001509,ENSSSCG00000001561,ENSSSCG00000001667,ENSSSCG00000001710,ENSSSCG00000001727,ENSSSCG00000001912,ENSSSCG00000001952,ENSSSCG00000001958,ENSSSCG00000002002,…	PPARA,TNRC6B,RHEBL1,STAT2,IRAK3,LRP6,ACRBP,NTS,E2F7,TRIM26,PSMB9,TAPBP,DAXX,ETV7,ZNF318,RUNX2,TNFRSF21,PML,NFKBIA,BAZ1A,IRF9,SLCO3A1,FUT8,RIOX1,OTUB2,PPP4R4,WARS1,NFAT5,SALL1,N4BP1,EXOSC5,BBC3,MED25,ZNF614,MAD2L2,UBR4,PUM1,MFSD2A,RLF,IMPACT,CELF4,PDE4B,DOCK7,MOB3C,ENSSSCG00000003989,TAB2,HIVEP2,TNFAIP3,TPD52L1,SMAD7,LIPG,ZNF609,LACTB,GATM,THBS1,ZNF516,MLLT3,CD274,JAK2,RORB,TLE4,NR4A3,TNC,TRAF1,SE…
36	regulation of molecular function	GO:0065009	GO:BP	1890	832	162	ENSSSCG00000000006,ENSSSCG00000000186,ENSSSCG00000000475,ENSSSCG00000000625,ENSSSCG00000000753,ENSSSCG00000000932,ENSSSCG00000001233,ENSSSCG00000001463,ENSSSCG00000001509,ENSSSCG00000001912,ENSSSCG00000001952,ENSSSCG00000002263,ENSSSCG00000002474,ENSSSCG00000002516,ENSSSCG00000003112,ENSSSCG00000003197,ENSSSCG00000003419,ENSSSCG00000003805,ENSSSCG00000003818,ENSSSCG00000004110,ENSSSCG00000004154,…	PPARA,RHEBL1,IRAK3,LRP6,WNK1,NTS,TRIM26,PSMB9,DAXX,PML,NFKBIA,SLCO3A1,PPP4R4,WARS1,BBC3,MED25,MAD2L2,PDE4B,DOCK7,TAB2,TNFAIP3,TPD52L1,SMAD7,TTBK2,THBS1,JAK2,TRAF1,ANGPT1,FZD6,DDR2,SLAMF1,NTRK1,NES,ADAR,CTSS,RBL1,PTGIS,ENSSSCG00000007527,DCUN1D3,MLST8,ADRA2B,EIF2AK2,ROCK2,ADRA2C,ARAP2,BTC,SCARB2,ARHGAP24,HMBOX1,HMGB2,P2RX7,OAS2,OASL,ACTN2,RET,FAS,IFIT2,IFIT1,NEURL1,ADRA2A,DENND1B,TOPORS,C9orf72,BA…
37	regulation of immune system process	GO:0002682	GO:BP	1126	832	114	ENSSSCG00000000396,ENSSSCG00000000457,ENSSSCG00000000475,ENSSSCG00000000753,ENSSSCG00000000774,ENSSSCG00000001341,ENSSSCG00000001394,ENSSSCG00000001453,ENSSSCG00000001727,ENSSSCG00000001952,ENSSSCG00000002841,ENSSSCG00000003419,ENSSSCG00000003591,ENSSSCG00000003805,ENSSSCG00000004154,ENSSSCG00000004507,ENSSSCG00000004687,ENSSSCG00000004789,ENSSSCG00000005055,ENSSSCG00000005211,ENSSSCG00000005215,…	STAT2,USP15,IRAK3,WNK1,USP18,ENSSSCG00000001341,ENSSSCG00000001394,HLA-DRA,TNFRSF21,NFKBIA,N4BP1,MAD2L2,PUM1,PDE4B,TNFAIP3,SMAD7,ENSSSCG00000004687,THBS1,LGALS3,CD274,JAK2,CCN3,ANGPT1,SELP,SLAMF1,ADAR,VCAM1,IDO1,ZNF335,ZBP1,EIF2AK2,LYAR,TEC,OTUD4,TIFA,ACOD1,TNFSF13B,HMGB2,DDX60,P2RX7,TRAFD1,BLNK,ENTPD7,DENND1B,HMCES,APOD,PARP14,NFKBIZ,ATP11C,IRF7,UNC93B1,SLC15A3,CFD,ICAM1,AP3B1,IRF1,CXCL14,TRIM21…
38	response to organic substance	GO:0010033	GO:BP	1950	832	165	ENSSSCG00000000006,ENSSSCG00000000061,ENSSSCG00000000396,ENSSSCG00000000475,ENSSSCG00000000625,ENSSSCG00000000661,ENSSSCG00000000753,ENSSSCG00000000774,ENSSSCG00000001252,ENSSSCG00000001509,ENSSSCG00000001567,ENSSSCG00000001710,ENSSSCG00000001727,ENSSSCG00000001750,ENSSSCG00000001906,ENSSSCG00000001912,ENSSSCG00000001920,ENSSSCG00000001952,ENSSSCG00000002755,ENSSSCG00000003601,ENSSSCG00000003805,…	PPARA,PMM1,STAT2,IRAK3,LRP6,PHC1,WNK1,USP18,UBD,DAXX,CPNE5,RUNX2,TNFRSF21,PAQR8,CYP1A1,PML,HCN4,NFKBIA,NFAT5,HCRTR1,PDE4B,TAB2,TNFAIP3,SMAD7,THBS1,CD274,JAK2,ENTREP1,NR4A3,ABCA1,TRAF1,SETX,ANGPT1,USF1,ADAR,CTSS,GDAP2,HIPK1,VCAM1,IDO1,PTGIS,ZBP1,CIITA,EIF2AK2,NCOA1,ROCK2,CMPK2,CXCL8,CXCL11,OTUD4,SPP1,ACOD1,TNFSF13B,HMGB2,P2RX7,OAS2,ACTN2,RET,IFIT1,NEURL1,ADRA2A,SMARCC1,PDE12,PLSCR4,PARP14,NFKBIZ,M…
39	regulation of immune response	GO:0050776	GO:BP	643	832	80	ENSSSCG00000000396,ENSSSCG00000000457,ENSSSCG00000000475,ENSSSCG00000000753,ENSSSCG00000000774,ENSSSCG00000001341,ENSSSCG00000001394,ENSSSCG00000001453,ENSSSCG00000001727,ENSSSCG00000001952,ENSSSCG00000002841,ENSSSCG00000003419,ENSSSCG00000003591,ENSSSCG00000003805,ENSSSCG00000004154,ENSSSCG00000004507,ENSSSCG00000005211,ENSSSCG00000006380,ENSSSCG00000006543,ENSSSCG00000007007,ENSSSCG00000007508,…	STAT2,USP15,IRAK3,WNK1,USP18,ENSSSCG00000001341,ENSSSCG00000001394,HLA-DRA,TNFRSF21,NFKBIA,N4BP1,MAD2L2,PUM1,PDE4B,TNFAIP3,SMAD7,CD274,SLAMF1,ADAR,IDO1,ZBP1,EIF2AK2,LYAR,TEC,OTUD4,TIFA,ACOD1,TNFSF13B,HMGB2,DDX60,P2RX7,TRAFD1,BLNK,ENTPD7,DENND1B,HMCES,PARP14,NFKBIZ,IRF7,UNC93B1,SLC15A3,CFD,AP3B1,IRF1,TRIM21,IL18,IFIH1,FZD5,DHX58,CCR7,TBX21,TRIM25,SUPT6H,CGAS,NMI,TIRAP,FCN2,RIPK2,TICAM1,GBP1,TAP2,P…
40	cellular response to organic substance	GO:0071310	GO:BP	1473	832	136	ENSSSCG00000000006,ENSSSCG00000000061,ENSSSCG00000000396,ENSSSCG00000000475,ENSSSCG00000000625,ENSSSCG00000000661,ENSSSCG00000000753,ENSSSCG00000000774,ENSSSCG00000001509,ENSSSCG00000001727,ENSSSCG00000001750,ENSSSCG00000001906,ENSSSCG00000001912,ENSSSCG00000001920,ENSSSCG00000001952,ENSSSCG00000002755,ENSSSCG00000003601,ENSSSCG00000003805,ENSSSCG00000004154,ENSSSCG00000004507,ENSSSCG00000005215,…	PPARA,PMM1,STAT2,IRAK3,LRP6,PHC1,WNK1,USP18,DAXX,TNFRSF21,PAQR8,CYP1A1,PML,HCN4,NFKBIA,NFAT5,HCRTR1,PDE4B,TNFAIP3,SMAD7,JAK2,ENTREP1,NR4A3,ABCA1,TRAF1,SETX,ANGPT1,USF1,ADAR,CTSS,HIPK1,VCAM1,PTGIS,ZBP1,EIF2AK2,NCOA1,ROCK2,CMPK2,CXCL8,CXCL11,OTUD4,SPP1,ACOD1,TNFSF13B,HMGB2,P2RX7,OAS2,ACTN2,RET,IFIT1,NEURL1,ADRA2A,SMARCC1,PDE12,PLSCR4,PARP14,NFKBIZ,MX1,OGT,IRF7,CDC42EP2,ICAM1,IRF1,HTR4,TRIM68,IL18,T…
41	positive regulation of nitrogen compound metabolic process	GO:0051173	GO:BP	2444	832	193	ENSSSCG00000000006,ENSSSCG00000000078,ENSSSCG00000000396,ENSSSCG00000000625,ENSSSCG00000000700,ENSSSCG00000000950,ENSSSCG00000001509,ENSSSCG00000001667,ENSSSCG00000001710,ENSSSCG00000001912,ENSSSCG00000001952,ENSSSCG00000001958,ENSSSCG00000002002,ENSSSCG00000002263,ENSSSCG00000002755,ENSSSCG00000002836,ENSSSCG00000003015,ENSSSCG00000003112,ENSSSCG00000003197,ENSSSCG00000003419,ENSSSCG00000003591,…	PPARA,TNRC6B,STAT2,LRP6,ACRBP,E2F7,DAXX,ZNF318,RUNX2,PML,NFKBIA,BAZ1A,IRF9,SLCO3A1,NFAT5,SALL1,EXOSC5,BBC3,MED25,MAD2L2,PUM1,IMPACT,CELF4,DOCK7,MOB3C,ENSSSCG00000003989,TAB2,TNFAIP3,TPD52L1,SMAD7,ZNF609,THBS1,ZNF516,MLLT3,JAK2,RORB,NR4A3,SETX,AGO2,ATAD2,ANGPT1,DDR2,UHMK1,USF1,CTSS,BCL9,MOV10,PLAGL2,PHF20,NFATC2IP,DCUN1D3,CIITA,MLST8,ADRA2B,TET3,REL,NCOA1,ROCK2,ADRA2C,LYAR,BTC,OTUD4,JADE1,SPP1,ENS…
42	regulation of macromolecule metabolic process	GO:0060255	GO:BP	5233	832	337	ENSSSCG00000000006,ENSSSCG00000000078,ENSSSCG00000000186,ENSSSCG00000000396,ENSSSCG00000000475,ENSSSCG00000000625,ENSSSCG00000000700,ENSSSCG00000000932,ENSSSCG00000000950,ENSSSCG00000001233,ENSSSCG00000001463,ENSSSCG00000001507,ENSSSCG00000001509,ENSSSCG00000001561,ENSSSCG00000001667,ENSSSCG00000001710,ENSSSCG00000001727,ENSSSCG00000001912,ENSSSCG00000001952,ENSSSCG00000001958,ENSSSCG00000002002,…	PPARA,TNRC6B,RHEBL1,STAT2,IRAK3,LRP6,ACRBP,NTS,E2F7,TRIM26,PSMB9,TAPBP,DAXX,ETV7,ZNF318,RUNX2,TNFRSF21,PML,NFKBIA,BAZ1A,IRF9,SLCO3A1,FUT8,RIOX1,OTUB2,PPP4R4,WARS1,NFAT5,SALL1,N4BP1,EXOSC5,BBC3,MED25,ZNF614,MAD2L2,PUM1,RLF,IMPACT,CELF4,PDE4B,DOCK7,MOB3C,ENSSSCG00000003989,TAB2,HIVEP2,TNFAIP3,TPD52L1,SMAD7,LIPG,ZNF609,THBS1,ZNF516,MLLT3,CD274,JAK2,RORB,TLE4,NR4A3,TNC,TRAF1,SETX,AGO2,ATAD2,ANGPT1,FZ…
43	regulation of response to biotic stimulus	GO:0002831	GO:BP	354	832	56	ENSSSCG00000000396,ENSSSCG00000000457,ENSSSCG00000000475,ENSSSCG00000000774,ENSSSCG00000001952,ENSSSCG00000002841,ENSSSCG00000003591,ENSSSCG00000004154,ENSSSCG00000005211,ENSSSCG00000006543,ENSSSCG00000007508,ENSSSCG00000008496,ENSSSCG00000008729,ENSSSCG00000009042,ENSSSCG00000009129,ENSSSCG00000009469,ENSSSCG00000009704,ENSSSCG00000009720,ENSSSCG00000009886,ENSSSCG00000011874,ENSSSCG00000011876,…	STAT2,USP15,IRAK3,USP18,NFKBIA,N4BP1,PUM1,TNFAIP3,CD274,ADAR,ZBP1,EIF2AK2,LYAR,OTUD4,TIFA,ACOD1,HMGB2,DDX60,TRAFD1,PARP14,DTX3L,NFKBIZ,IRF7,UNC93B1,SLC15A3,AP3B1,IRF1,TRIM21,IFIH1,STAT1,DHX58,TRIM25,CGAS,NMI,TIRAP,RIPK2,TIGAR,CX3CL1,TICAM1,PARP9,SAMHD1,ZNFX1,HERC5,ALPK1,TRIM56,C1QBP,PLSCR1,WNT5A,RAB7B,ZC3H12A,TRAF6,IL27,NLRC5,FBXL2,ISG15,OAS1
44	regulation of cellular process	GO:0050794	GO:BP	10633	832	576	ENSSSCG00000000006,ENSSSCG00000000078,ENSSSCG00000000135,ENSSSCG00000000186,ENSSSCG00000000197,ENSSSCG00000000206,ENSSSCG00000000217,ENSSSCG00000000396,ENSSSCG00000000457,ENSSSCG00000000475,ENSSSCG00000000523,ENSSSCG00000000623,ENSSSCG00000000625,ENSSSCG00000000700,ENSSSCG00000000753,ENSSSCG00000000774,ENSSSCG00000000932,ENSSSCG00000000950,ENSSSCG00000001233,ENSSSCG00000001252,ENSSSCG00000001341,…	PPARA,TNRC6B,KCTD17,RHEBL1,C1QL4,FAIM2,RACGAP1,STAT2,USP15,IRAK3,BBS10,BCL2L14,LRP6,ACRBP,WNK1,USP18,NTS,E2F7,TRIM26,UBD,ENSSSCG00000001341,DDR1,ENSSSCG00000001394,HLA-DRA,TAPBP,DAXX,ENSSSCG00000001516,GRM4,ETV7,CPNE5,DAAM2,ZNF318,RUNX2,TNFRSF21,PAQR8,PEAK1,PML,HCN4,NFKBIA,BAZ1A,HECTD1,IRF9,SLCO3A1,FUT8,ZFYVE26,RIOX1,OTUB2,PPP4R4,WARS1,TUBB3,MLKL,NFAT5,SALL1,N4BP1,EXOSC5,BBC3,PLEKHA4,MED25,ZNF614…
45	negative regulation of signal transduction	GO:0009968	GO:BP	1004	832	104	ENSSSCG00000000006,ENSSSCG00000000197,ENSSSCG00000000206,ENSSSCG00000000396,ENSSSCG00000000475,ENSSSCG00000000774,ENSSSCG00000001710,ENSSSCG00000001952,ENSSSCG00000003419,ENSSSCG00000003439,ENSSSCG00000003805,ENSSSCG00000004154,ENSSSCG00000004507,ENSSSCG00000004789,ENSSSCG00000005055,ENSSSCG00000005166,ENSSSCG00000005249,ENSSSCG00000005288,ENSSSCG00000006002,ENSSSCG00000006052,ENSSSCG00000006302,…	PPARA,C1QL4,FAIM2,STAT2,IRAK3,USP18,RUNX2,NFKBIA,MAD2L2,DHRS3,PDE4B,TNFAIP3,SMAD7,THBS1,LGALS3,MLLT3,ENTREP1,TLE4,CCN3,FZD6,GPR161,SLAMF1,ADAR,ENSSSCG00000008147,RNF149,SPRED2,HTRA3,RASL11B,CXCL8,OTUD4,HHIP,JADE1,ARHGAP24,ACOD1,HMGB2,P2RX7,BICC1,NEURL1,BAMBI,NRP1,NPHP3,SKIL,APOD,HEG1,PARP14,ICAM1,HMGCR,ARHGAP42,DUSP4,FRZB,STAT1,CFLAR,EPHA4,INSIG1,ITGA1,FST,DHX58,NF1,SOCS7,NMI,SCG2,PRKCD,NRROS,TNF…
46	negative regulation of cellular process	GO:0048523	GO:BP	4076	832	277	ENSSSCG00000000006,ENSSSCG00000000078,ENSSSCG00000000197,ENSSSCG00000000206,ENSSSCG00000000396,ENSSSCG00000000475,ENSSSCG00000000625,ENSSSCG00000000753,ENSSSCG00000000774,ENSSSCG00000000932,ENSSSCG00000000950,ENSSSCG00000001382,ENSSSCG00000001509,ENSSSCG00000001561,ENSSSCG00000001595,ENSSSCG00000001667,ENSSSCG00000001710,ENSSSCG00000001727,ENSSSCG00000001912,ENSSSCG00000001952,ENSSSCG00000001958,…	PPARA,TNRC6B,C1QL4,FAIM2,STAT2,IRAK3,LRP6,WNK1,USP18,NTS,E2F7,DDR1,DAXX,ETV7,DAAM2,ZNF318,RUNX2,TNFRSF21,PML,NFKBIA,BAZ1A,HECTD1,RIOX1,OTUB2,PPP4R4,WARS1,SALL1,N4BP1,EXOSC5,BBC3,MED25,ZNF614,MAD2L2,MIIP,DHRS3,UBR4,PUM1,MFSD2A,IMPACT,CELF4,PDE4B,TACSTD2,TNFAIP3,SMAD7,TTBK2,THBS1,LGALS3,MLLT3,SLC24A2,CD274,JAK2,ENTREP1,RORB,TLE4,SETX,AGO2,CCN3,ANGPT1,FZD6,SDCBP,GPR161,SLAMF1,NTRK1,ADAR,MOV10,PCM1,I…
47	negative regulation of cell communication	GO:0010648	GO:BP	1064	832	107	ENSSSCG00000000006,ENSSSCG00000000197,ENSSSCG00000000206,ENSSSCG00000000396,ENSSSCG00000000475,ENSSSCG00000000774,ENSSSCG00000001710,ENSSSCG00000001952,ENSSSCG00000003419,ENSSSCG00000003439,ENSSSCG00000003805,ENSSSCG00000004154,ENSSSCG00000004507,ENSSSCG00000004789,ENSSSCG00000005055,ENSSSCG00000005166,ENSSSCG00000005167,ENSSSCG00000005249,ENSSSCG00000005288,ENSSSCG00000006002,ENSSSCG00000006052,…	PPARA,C1QL4,FAIM2,STAT2,IRAK3,USP18,RUNX2,NFKBIA,MAD2L2,DHRS3,PDE4B,TNFAIP3,SMAD7,THBS1,LGALS3,MLLT3,SLC24A2,ENTREP1,TLE4,CCN3,FZD6,GPR161,SLAMF1,ADAR,ENSSSCG00000008147,RNF149,SPRED2,HTRA3,RASL11B,CXCL8,OTUD4,HHIP,JADE1,ARHGAP24,ACOD1,HMGB2,P2RX7,BICC1,NEURL1,ADRA2A,BAMBI,NRP1,NPHP3,SKIL,APOD,HEG1,PARP14,ICAM1,HMGCR,ARHGAP42,DUSP4,FRZB,STAT1,CFLAR,EPHA4,INSIG1,ITGA1,FST,DHX58,NF1,SOCS7,NMI,SCG2,…
48	regulation of response to stress	GO:0080134	GO:BP	1038	832	105	ENSSSCG00000000006,ENSSSCG00000000396,ENSSSCG00000000457,ENSSSCG00000000475,ENSSSCG00000000774,ENSSSCG00000001912,ENSSSCG00000001952,ENSSSCG00000002283,ENSSSCG00000002469,ENSSSCG00000002841,ENSSSCG00000003419,ENSSSCG00000003591,ENSSSCG00000004154,ENSSSCG00000004225,ENSSSCG00000004789,ENSSSCG00000005215,ENSSSCG00000005494,ENSSSCG00000005511,ENSSSCG00000006002,ENSSSCG00000006380,ENSSSCG00000006543,…	PPARA,STAT2,USP15,IRAK3,USP18,PML,NFKBIA,FUT8,OTUB2,N4BP1,MAD2L2,PUM1,TNFAIP3,TPD52L1,THBS1,JAK2,TNC,TRAF1,CCN3,SLAMF1,ADAR,IDO1,PTGIS,ZBP1,EIF2AK2,LYAR,OTUD4,TIFA,ACOD1,HMGB2,DDX60,TRAFD1,AIFM2,FAS,ADRA2A,SKIL,PARP14,DTX3L,NFKBIZ,IRF7,UNC93B1,SLC15A3,AP3B1,IRF1,TRIM21,CHORDC1,IL18,IFIH1,STAT1,INO80D,EPHA4,EFHD1,INSIG1,PTN,POT1,DHX58,CCR7,TRIM25,IL6,CGAS,NMI,TIRAP,PRKCD,TNFAIP6,RIPK2,TIGAR,RNASEH…
49	negative regulation of signaling	GO:0023057	GO:BP	1069	832	107	ENSSSCG00000000006,ENSSSCG00000000197,ENSSSCG00000000206,ENSSSCG00000000396,ENSSSCG00000000475,ENSSSCG00000000774,ENSSSCG00000001710,ENSSSCG00000001952,ENSSSCG00000003419,ENSSSCG00000003439,ENSSSCG00000003805,ENSSSCG00000004154,ENSSSCG00000004507,ENSSSCG00000004789,ENSSSCG00000005055,ENSSSCG00000005166,ENSSSCG00000005167,ENSSSCG00000005249,ENSSSCG00000005288,ENSSSCG00000006002,ENSSSCG00000006052,…	PPARA,C1QL4,FAIM2,STAT2,IRAK3,USP18,RUNX2,NFKBIA,MAD2L2,DHRS3,PDE4B,TNFAIP3,SMAD7,THBS1,LGALS3,MLLT3,SLC24A2,ENTREP1,TLE4,CCN3,FZD6,GPR161,SLAMF1,ADAR,ENSSSCG00000008147,RNF149,SPRED2,HTRA3,RASL11B,CXCL8,OTUD4,HHIP,JADE1,ARHGAP24,ACOD1,HMGB2,P2RX7,BICC1,NEURL1,ADRA2A,BAMBI,NRP1,NPHP3,SKIL,APOD,HEG1,PARP14,ICAM1,HMGCR,ARHGAP42,DUSP4,FRZB,STAT1,CFLAR,EPHA4,INSIG1,ITGA1,FST,DHX58,NF1,SOCS7,NMI,SCG2,…
50	regulation of cellular metabolic process	GO:0031323	GO:BP	5169	832	330	ENSSSCG00000000006,ENSSSCG00000000078,ENSSSCG00000000186,ENSSSCG00000000396,ENSSSCG00000000475,ENSSSCG00000000625,ENSSSCG00000000700,ENSSSCG00000000932,ENSSSCG00000000950,ENSSSCG00000001233,ENSSSCG00000001507,ENSSSCG00000001509,ENSSSCG00000001561,ENSSSCG00000001667,ENSSSCG00000001710,ENSSSCG00000001727,ENSSSCG00000001912,ENSSSCG00000001952,ENSSSCG00000001958,ENSSSCG00000002002,ENSSSCG00000002263,…	PPARA,TNRC6B,RHEBL1,STAT2,IRAK3,LRP6,ACRBP,NTS,E2F7,TRIM26,TAPBP,DAXX,ETV7,ZNF318,RUNX2,TNFRSF21,PML,NFKBIA,BAZ1A,IRF9,SLCO3A1,FUT8,RIOX1,OTUB2,PPP4R4,WARS1,NFAT5,SALL1,N4BP1,EXOSC5,MED25,ZNF614,MAD2L2,UBR4,PUM1,MFSD2A,RLF,IMPACT,CELF4,PDE4B,DOCK7,MOB3C,ENSSSCG00000003989,TAB2,HIVEP2,TNFAIP3,TPD52L1,SMAD7,LIPG,ZNF609,THBS1,ZNF516,MLLT3,CD274,JAK2,RORB,TLE4,NR4A3,TNC,TRAF1,SETX,AGO2,ATAD2,ANGPT1,F…
51	regulation of defense response	GO:0031347	GO:BP	545	832	70	ENSSSCG00000000006,ENSSSCG00000000396,ENSSSCG00000000457,ENSSSCG00000000475,ENSSSCG00000000774,ENSSSCG00000001952,ENSSSCG00000002841,ENSSSCG00000003591,ENSSSCG00000004154,ENSSSCG00000005215,ENSSSCG00000005494,ENSSSCG00000006002,ENSSSCG00000006543,ENSSSCG00000007007,ENSSSCG00000007463,ENSSSCG00000007508,ENSSSCG00000008496,ENSSSCG00000008729,ENSSSCG00000009042,ENSSSCG00000009129,ENSSSCG00000009469,…	PPARA,STAT2,USP15,IRAK3,USP18,NFKBIA,N4BP1,PUM1,TNFAIP3,JAK2,TNC,CCN3,ADAR,IDO1,PTGIS,ZBP1,EIF2AK2,LYAR,OTUD4,TIFA,ACOD1,HMGB2,DDX60,TRAFD1,PARP14,DTX3L,NFKBIZ,IRF7,UNC93B1,SLC15A3,AP3B1,IRF1,TRIM21,IL18,IFIH1,STAT1,DHX58,CCR7,TRIM25,IL6,CGAS,NMI,TIRAP,TNFAIP6,RIPK2,CX3CL1,TICAM1,IER3,PARP9,SAMHD1,FNDC4,ZNFX1,HERC5,PLA2G2D,ALPK1,TRIM56,C1QBP,PLSCR1,WNT5A,RAB7B,SNX4,FEM1A,ZC3H12A,IL27,NLRC5,FBXL2,…
52	regulation of response to external stimulus	GO:0032101	GO:BP	770	832	86	ENSSSCG00000000006,ENSSSCG00000000396,ENSSSCG00000000457,ENSSSCG00000000475,ENSSSCG00000000753,ENSSSCG00000000774,ENSSSCG00000001952,ENSSSCG00000002841,ENSSSCG00000003591,ENSSSCG00000004154,ENSSSCG00000004789,ENSSSCG00000005215,ENSSSCG00000005494,ENSSSCG00000006002,ENSSSCG00000006380,ENSSSCG00000006543,ENSSSCG00000007007,ENSSSCG00000007463,ENSSSCG00000007508,ENSSSCG00000008496,ENSSSCG00000008729,…	PPARA,STAT2,USP15,IRAK3,WNK1,USP18,NFKBIA,N4BP1,PUM1,TNFAIP3,THBS1,JAK2,TNC,CCN3,SLAMF1,ADAR,IDO1,PTGIS,ZBP1,EIF2AK2,LYAR,CXCL8,OTUD4,TIFA,ACOD1,MYCBP2,HMGB2,DDX60,TRAFD1,NRP1,PARP14,DTX3L,NFKBIZ,IRF7,UNC93B1,SLC15A3,AP3B1,IRF1,CXCL14,TRIM21,IL18,IFIH1,STAT1,EPHA4,PTN,DHX58,CCR7,TRIM25,IL6,CGAS,NMI,TIRAP,SCG2,PRKCD,TNFAIP6,RIPK2,MT3,CX3CL1,TICAM1,FGF1,IER3,PARP9,SAMHD1,FNDC4,ZNFX1,HERC5,PLA2G2D,A…
53	negative regulation of response to stimulus	GO:0048585	GO:BP	1273	832	119	ENSSSCG00000000006,ENSSSCG00000000197,ENSSSCG00000000206,ENSSSCG00000000396,ENSSSCG00000000457,ENSSSCG00000000475,ENSSSCG00000000774,ENSSSCG00000001710,ENSSSCG00000001952,ENSSSCG00000002469,ENSSSCG00000003419,ENSSSCG00000003439,ENSSSCG00000003805,ENSSSCG00000004154,ENSSSCG00000004507,ENSSSCG00000004789,ENSSSCG00000005055,ENSSSCG00000005166,ENSSSCG00000005249,ENSSSCG00000005288,ENSSSCG00000006002,…	PPARA,C1QL4,FAIM2,STAT2,USP15,IRAK3,USP18,RUNX2,NFKBIA,OTUB2,MAD2L2,DHRS3,PDE4B,TNFAIP3,SMAD7,THBS1,LGALS3,MLLT3,ENTREP1,TLE4,CCN3,FZD6,GPR161,SLAMF1,ADAR,PTGIS,ENSSSCG00000008147,RNF149,SPRED2,HTRA3,LYAR,RASL11B,CXCL8,OTUD4,HHIP,JADE1,ARHGAP24,ACOD1,HMGB2,P2RX7,TRAFD1,BICC1,NEURL1,ADRA2A,BAMBI,NRP1,NPHP3,SKIL,APOD,HEG1,PARP14,ICAM1,HMGCR,TRIM21,ARHGAP42,DUSP4,FRZB,STAT1,CFLAR,EPHA4,INSIG1,NOS3,I…
54	cellular response to cytokine stimulus	GO:0071345	GO:BP	653	832	77	ENSSSCG00000000061,ENSSSCG00000000396,ENSSSCG00000000475,ENSSSCG00000000661,ENSSSCG00000000753,ENSSSCG00000000774,ENSSSCG00000001727,ENSSSCG00000001912,ENSSSCG00000001952,ENSSSCG00000002755,ENSSSCG00000004507,ENSSSCG00000005215,ENSSSCG00000005249,ENSSSCG00000005511,ENSSSCG00000006035,ENSSSCG00000006543,ENSSSCG00000006760,ENSSSCG00000007463,ENSSSCG00000007508,ENSSSCG00000008953,ENSSSCG00000008978,…	PMM1,STAT2,IRAK3,PHC1,WNK1,USP18,TNFRSF21,PML,NFKBIA,NFAT5,SMAD7,JAK2,ENTREP1,TRAF1,ANGPT1,ADAR,HIPK1,PTGIS,ZBP1,CXCL8,CXCL11,OTUD4,TNFSF13B,OAS2,IFIT1,PDE12,PARP14,NFKBIZ,MX1,IRF7,CDC42EP2,ICAM1,IRF1,IL18,TNFSF18,IFIH1,STAT1,ATIC,LIFR,IL31RA,CCR7,CSF3,TRIM25,IL6,STIP1,RAB20,SLC2A4,RIPK2,MT3,SIGIRR,CX3CL1,GBP1,RNMT,PARP9,SAMHD1,SOCS1,CCL4,CXCL10,CXCL9,TRIM56,IRF8,EDN1,ENSSSCG00000035736,WNT5A,RAB…
55	positive regulation of immune system process	GO:0002684	GO:BP	781	832	86	ENSSSCG00000000457,ENSSSCG00000000475,ENSSSCG00000000753,ENSSSCG00000001341,ENSSSCG00000001394,ENSSSCG00000001453,ENSSSCG00000001727,ENSSSCG00000001952,ENSSSCG00000003419,ENSSSCG00000003591,ENSSSCG00000003805,ENSSSCG00000004154,ENSSSCG00000004687,ENSSSCG00000004789,ENSSSCG00000005055,ENSSSCG00000005211,ENSSSCG00000005215,ENSSSCG00000006288,ENSSSCG00000006380,ENSSSCG00000006862,ENSSSCG00000007007,…	USP15,IRAK3,WNK1,ENSSSCG00000001341,ENSSSCG00000001394,HLA-DRA,TNFRSF21,NFKBIA,MAD2L2,PUM1,PDE4B,TNFAIP3,ENSSSCG00000004687,THBS1,LGALS3,CD274,JAK2,SELP,SLAMF1,VCAM1,IDO1,ZNF335,ZBP1,EIF2AK2,TEC,OTUD4,TIFA,ACOD1,TNFSF13B,HMGB2,DDX60,P2RX7,BLNK,DENND1B,HMCES,NFKBIZ,ATP11C,IRF7,UNC93B1,SLC15A3,CFD,ICAM1,AP3B1,IRF1,CXCL14,IL18,TNFSF18,IFIH1,FZD5,PTN,DHX58,CCR7,TBX21,TRIM25,IL6,CGAS,NMI,TIRAP,FCN2,RI…
56	positive regulation of cell communication	GO:0010647	GO:BP	1285	832	118	ENSSSCG00000000457,ENSSSCG00000000753,ENSSSCG00000000932,ENSSSCG00000001252,ENSSSCG00000001523,ENSSSCG00000001595,ENSSSCG00000001912,ENSSSCG00000002755,ENSSSCG00000002836,ENSSSCG00000003112,ENSSSCG00000003137,ENSSSCG00000003591,ENSSSCG00000003601,ENSSSCG00000004110,ENSSSCG00000004154,ENSSSCG00000004218,ENSSSCG00000004225,ENSSSCG00000004789,ENSSSCG00000005166,ENSSSCG00000005167,ENSSSCG00000005215,…	USP15,WNK1,NTS,UBD,GRM4,DAAM2,PML,NFAT5,SALL1,BBC3,PLEKHA4,PUM1,HCRTR1,TAB2,TNFAIP3,RSPO3,TPD52L1,THBS1,MLLT3,SLC24A2,JAK2,TRAF1,CCN3,ANGPT1,SDCBP,SLAMF1,NTRK1,CTSS,PLAGL2,PTGIS,ZBP1,MLST8,ADRA2B,USP34,REL,EIF2AK2,ADRA2C,TIFA,SPP1,DDX60,P2RX7,RET,FAS,IFIT5,ADRA2A,BAMBI,JCAD,NRP1,CLSTN2,SKIL,PARP14,IRF7,GAL,SLC15A3,ICAM1,HMGCR,ENSSSCG00000014670,TRIM68,TRIM21,IL18,ELAPOR2,CFLAR,FZD5,EPHA4,PTN,ESM1…
57	positive regulation of signaling	GO:0023056	GO:BP	1289	832	118	ENSSSCG00000000457,ENSSSCG00000000753,ENSSSCG00000000932,ENSSSCG00000001252,ENSSSCG00000001523,ENSSSCG00000001595,ENSSSCG00000001912,ENSSSCG00000002755,ENSSSCG00000002836,ENSSSCG00000003112,ENSSSCG00000003137,ENSSSCG00000003591,ENSSSCG00000003601,ENSSSCG00000004110,ENSSSCG00000004154,ENSSSCG00000004218,ENSSSCG00000004225,ENSSSCG00000004789,ENSSSCG00000005166,ENSSSCG00000005167,ENSSSCG00000005215,…	USP15,WNK1,NTS,UBD,GRM4,DAAM2,PML,NFAT5,SALL1,BBC3,PLEKHA4,PUM1,HCRTR1,TAB2,TNFAIP3,RSPO3,TPD52L1,THBS1,MLLT3,SLC24A2,JAK2,TRAF1,CCN3,ANGPT1,SDCBP,SLAMF1,NTRK1,CTSS,PLAGL2,PTGIS,ZBP1,MLST8,ADRA2B,USP34,REL,EIF2AK2,ADRA2C,TIFA,SPP1,DDX60,P2RX7,RET,FAS,IFIT5,ADRA2A,BAMBI,JCAD,NRP1,CLSTN2,SKIL,PARP14,IRF7,GAL,SLC15A3,ICAM1,HMGCR,ENSSSCG00000014670,TRIM68,TRIM21,IL18,ELAPOR2,CFLAR,FZD5,EPHA4,PTN,ESM1…
58	regulation of innate immune response	GO:0045088	GO:BP	287	832	46	ENSSSCG00000000396,ENSSSCG00000000457,ENSSSCG00000000475,ENSSSCG00000000774,ENSSSCG00000001952,ENSSSCG00000002841,ENSSSCG00000003591,ENSSSCG00000004154,ENSSSCG00000006543,ENSSSCG00000007508,ENSSSCG00000008496,ENSSSCG00000008729,ENSSSCG00000009042,ENSSSCG00000009129,ENSSSCG00000009704,ENSSSCG00000009720,ENSSSCG00000009886,ENSSSCG00000011874,ENSSSCG00000011951,ENSSSCG00000012853,ENSSSCG00000012893,…	STAT2,USP15,IRAK3,USP18,NFKBIA,N4BP1,PUM1,TNFAIP3,ADAR,ZBP1,EIF2AK2,LYAR,OTUD4,TIFA,HMGB2,DDX60,TRAFD1,PARP14,NFKBIZ,IRF7,UNC93B1,SLC15A3,AP3B1,IRF1,TRIM21,IFIH1,DHX58,TRIM25,CGAS,NMI,TIRAP,RIPK2,TICAM1,PARP9,SAMHD1,ZNFX1,ALPK1,TRIM56,C1QBP,PLSCR1,WNT5A,RAB7B,NLRC5,FBXL2,ISG15,OAS1
59	positive regulation of signal transduction	GO:0009967	GO:BP	1138	832	107	ENSSSCG00000000457,ENSSSCG00000000753,ENSSSCG00000000932,ENSSSCG00000001252,ENSSSCG00000001523,ENSSSCG00000001595,ENSSSCG00000001912,ENSSSCG00000002755,ENSSSCG00000002836,ENSSSCG00000003112,ENSSSCG00000003137,ENSSSCG00000003591,ENSSSCG00000003601,ENSSSCG00000004110,ENSSSCG00000004154,ENSSSCG00000004218,ENSSSCG00000004225,ENSSSCG00000004789,ENSSSCG00000005166,ENSSSCG00000005215,ENSSSCG00000005511,…	USP15,WNK1,NTS,UBD,GRM4,DAAM2,PML,NFAT5,SALL1,BBC3,PLEKHA4,PUM1,HCRTR1,TAB2,TNFAIP3,RSPO3,TPD52L1,THBS1,MLLT3,JAK2,TRAF1,CCN3,ANGPT1,SDCBP,SLAMF1,NTRK1,CTSS,PLAGL2,PTGIS,ZBP1,MLST8,ADRA2B,USP34,REL,EIF2AK2,ADRA2C,TIFA,DDX60,P2RX7,RET,FAS,IFIT5,ADRA2A,BAMBI,JCAD,NRP1,SKIL,PARP14,IRF7,SLC15A3,ICAM1,ENSSSCG00000014670,TRIM68,TRIM21,IL18,ELAPOR2,CFLAR,FZD5,EPHA4,ESM1,DHX58,CCR7,CSF3,TRIM25,IL6,NMI,TI…
60	positive regulation of molecular function	GO:0044093	GO:BP	1094	832	104	ENSSSCG00000000186,ENSSSCG00000000475,ENSSSCG00000000625,ENSSSCG00000000932,ENSSSCG00000001233,ENSSSCG00000001509,ENSSSCG00000001912,ENSSSCG00000002263,ENSSSCG00000003112,ENSSSCG00000003197,ENSSSCG00000003818,ENSSSCG00000004110,ENSSSCG00000004225,ENSSSCG00000004789,ENSSSCG00000005215,ENSSSCG00000005511,ENSSSCG00000006035,ENSSSCG00000006338,ENSSSCG00000006464,ENSSSCG00000006648,ENSSSCG00000007527,…	RHEBL1,IRAK3,LRP6,NTS,TRIM26,DAXX,PML,SLCO3A1,BBC3,MED25,DOCK7,TAB2,TPD52L1,THBS1,JAK2,TRAF1,ANGPT1,DDR2,NTRK1,CTSS,ENSSSCG00000007527,DCUN1D3,ADRA2B,EIF2AK2,ROCK2,ADRA2C,ARAP2,BTC,ARHGAP24,HMBOX1,HMGB2,P2RX7,ACTN2,RET,FAS,NEURL1,ADRA2A,DENND1B,TOPORS,C9orf72,BAMBI,USP6NL,NPHP3,DTX3L,GAL,ENSSSCG00000014670,TRIM68,TRIM21,ARHGAP42,IL18,PKP4,FZD5,EPHA4,NOS3,POT1,CHN2,ITGA1,CSF3,TRIM25,VMP1,NF1,ABR,I…
61	positive regulation of immune response	GO:0050778	GO:BP	517	832	64	ENSSSCG00000000457,ENSSSCG00000000475,ENSSSCG00000000753,ENSSSCG00000001341,ENSSSCG00000001394,ENSSSCG00000001453,ENSSSCG00000001727,ENSSSCG00000001952,ENSSSCG00000003419,ENSSSCG00000003591,ENSSSCG00000003805,ENSSSCG00000004154,ENSSSCG00000005211,ENSSSCG00000006380,ENSSSCG00000007007,ENSSSCG00000007508,ENSSSCG00000008496,ENSSSCG00000008820,ENSSSCG00000009042,ENSSSCG00000009129,ENSSSCG00000009469,…	USP15,IRAK3,WNK1,ENSSSCG00000001341,ENSSSCG00000001394,HLA-DRA,TNFRSF21,NFKBIA,MAD2L2,PUM1,PDE4B,TNFAIP3,CD274,SLAMF1,IDO1,ZBP1,EIF2AK2,TEC,OTUD4,TIFA,ACOD1,TNFSF13B,HMGB2,DDX60,P2RX7,BLNK,DENND1B,HMCES,NFKBIZ,IRF7,UNC93B1,SLC15A3,CFD,AP3B1,IRF1,IL18,IFIH1,FZD5,DHX58,CCR7,TBX21,TRIM25,CGAS,NMI,TIRAP,FCN2,RIPK2,TICAM1,GBP1,TAP2,PARP9,ZNFX1,ALPK1,TRIM56,C1QBP,PLSCR1,WNT5A,RAB7B,SNX4,ZC3H12A,TRAF6,N…
62	regulation of viral process	GO:0050792	GO:BP	122	832	29	ENSSSCG00000000006,ENSSSCG00000001233,ENSSSCG00000002841,ENSSSCG00000006543,ENSSSCG00000008496,ENSSSCG00000008953,ENSSSCG00000009881,ENSSSCG00000009921,ENSSSCG00000010452,ENSSSCG00000010454,ENSSSCG00000011465,ENSSSCG00000012077,ENSSSCG00000014670,ENSSSCG00000014768,ENSSSCG00000014780,ENSSSCG00000015549,ENSSSCG00000015897,ENSSSCG00000016057,ENSSSCG00000016512,ENSSSCG00000017614,ENSSSCG00000024867,…	PPARA,TRIM26,N4BP1,ADAR,EIF2AK2,CXCL8,OAS2,OASL,IFIT1,IFIT5,PDE12,MX1,ENSSSCG00000014670,TRIM68,TRIM21,RNASEL,IFIH1,STAT1,ZC3HAV1,TRIM25,ISG20,KPNA2,ZNFX1,TRIM14,TRIM38,PLSCR1,ENSSSCG00000038912,ISG15,OAS1
63	anatomical structure development	GO:0048856	GO:BP	4394	832	283	ENSSSCG00000000006,ENSSSCG00000000206,ENSSSCG00000000217,ENSSSCG00000000396,ENSSSCG00000000475,ENSSSCG00000000625,ENSSSCG00000000700,ENSSSCG00000000753,ENSSSCG00000000950,ENSSSCG00000001252,ENSSSCG00000001382,ENSSSCG00000001453,ENSSSCG00000001567,ENSSSCG00000001595,ENSSSCG00000001710,ENSSSCG00000001727,ENSSSCG00000001750,ENSSSCG00000001909,ENSSSCG00000001912,ENSSSCG00000001952,ENSSSCG00000001971,…	PPARA,FAIM2,RACGAP1,STAT2,IRAK3,LRP6,ACRBP,WNK1,E2F7,UBD,DDR1,HLA-DRA,CPNE5,DAAM2,RUNX2,TNFRSF21,PAQR8,STRA6,PML,NFKBIA,HECTD1,PPP4R4,WARS1,TUBB3,ATP2C2,SALL1,PLEKHA4,MAD2L2,DHRS3,MFSD2A,IMPACT,CELF4,DOCK7,TACSTD2,TAB2,TNFAIP3,RSPO3,ASF1A,ADGRB3,SMAD7,ZNF609,MAPK6,CEP152,THBS1,ZNF516,NIN,LGALS3,MLLT3,CD274,JAK2,RORB,TNC,SETX,AGO2,CCN3,ANGPT1,FZD6,VPS13B,SDCBP,GPR161,DDR2,UHMK1,SLAMF1,NTRK1,CRABP2…
64	negative regulation of viral process	GO:0048525	GO:BP	63	832	21	ENSSSCG00000001233,ENSSSCG00000002841,ENSSSCG00000008496,ENSSSCG00000009881,ENSSSCG00000009921,ENSSSCG00000010452,ENSSSCG00000010454,ENSSSCG00000012077,ENSSSCG00000014780,ENSSSCG00000015549,ENSSSCG00000015897,ENSSSCG00000016057,ENSSSCG00000016512,ENSSSCG00000017614,ENSSSCG00000024867,ENSSSCG00000030108,ENSSSCG00000033222,ENSSSCG00000035634,ENSSSCG00000038912,ENSSSCG00000040575,ENSSSCG00000046640	TRIM26,N4BP1,EIF2AK2,OAS2,OASL,IFIT1,IFIT5,MX1,TRIM21,RNASEL,IFIH1,STAT1,ZC3HAV1,TRIM25,ISG20,ZNFX1,TRIM14,PLSCR1,ENSSSCG00000038912,ISG15,OAS1
65	regulation of cellular biosynthetic process	GO:0031326	GO:BP	4372	832	281	ENSSSCG00000000006,ENSSSCG00000000078,ENSSSCG00000000186,ENSSSCG00000000396,ENSSSCG00000000475,ENSSSCG00000000625,ENSSSCG00000000700,ENSSSCG00000000932,ENSSSCG00000000950,ENSSSCG00000001233,ENSSSCG00000001507,ENSSSCG00000001509,ENSSSCG00000001561,ENSSSCG00000001667,ENSSSCG00000001710,ENSSSCG00000001727,ENSSSCG00000001912,ENSSSCG00000001952,ENSSSCG00000001958,ENSSSCG00000002002,ENSSSCG00000002263,…	PPARA,TNRC6B,RHEBL1,STAT2,IRAK3,LRP6,ACRBP,NTS,E2F7,TRIM26,TAPBP,DAXX,ETV7,ZNF318,RUNX2,TNFRSF21,PML,NFKBIA,BAZ1A,IRF9,SLCO3A1,FUT8,RIOX1,WARS1,NFAT5,SALL1,N4BP1,EXOSC5,MED25,ZNF614,MAD2L2,UBR4,PUM1,MFSD2A,RLF,IMPACT,CELF4,PDE4B,ENSSSCG00000003989,HIVEP2,TNFAIP3,SMAD7,ZNF609,THBS1,ZNF516,MLLT3,CD274,JAK2,RORB,TLE4,NR4A3,TNC,TRAF1,SETX,AGO2,ATAD2,ANGPT1,FZD6,ZFHX4,SDCBP,DDR2,UHMK1,USF1,SLAMF1,NTRK…
66	regulation of biosynthetic process	GO:0009889	GO:BP	4397	832	282	ENSSSCG00000000006,ENSSSCG00000000078,ENSSSCG00000000186,ENSSSCG00000000396,ENSSSCG00000000475,ENSSSCG00000000625,ENSSSCG00000000700,ENSSSCG00000000932,ENSSSCG00000000950,ENSSSCG00000001233,ENSSSCG00000001507,ENSSSCG00000001509,ENSSSCG00000001561,ENSSSCG00000001667,ENSSSCG00000001710,ENSSSCG00000001727,ENSSSCG00000001912,ENSSSCG00000001952,ENSSSCG00000001958,ENSSSCG00000002002,ENSSSCG00000002263,…	PPARA,TNRC6B,RHEBL1,STAT2,IRAK3,LRP6,ACRBP,NTS,E2F7,TRIM26,TAPBP,DAXX,ETV7,ZNF318,RUNX2,TNFRSF21,PML,NFKBIA,BAZ1A,IRF9,SLCO3A1,FUT8,RIOX1,WARS1,NFAT5,SALL1,N4BP1,EXOSC5,MED25,ZNF614,MAD2L2,UBR4,PUM1,MFSD2A,RLF,IMPACT,CELF4,PDE4B,ENSSSCG00000003989,HIVEP2,TNFAIP3,SMAD7,ZNF609,THBS1,ZNF516,MLLT3,CD274,JAK2,RORB,TLE4,NR4A3,TNC,TRAF1,SETX,AGO2,ATAD2,ANGPT1,FZD6,ZFHX4,SDCBP,DDR2,UHMK1,USF1,SLAMF1,NTRK…
67	regulation of viral life cycle	GO:1903900	GO:BP	102	832	26	ENSSSCG00000001233,ENSSSCG00000002841,ENSSSCG00000006543,ENSSSCG00000008496,ENSSSCG00000008953,ENSSSCG00000009881,ENSSSCG00000009921,ENSSSCG00000010452,ENSSSCG00000010454,ENSSSCG00000011465,ENSSSCG00000012077,ENSSSCG00000014670,ENSSSCG00000014768,ENSSSCG00000014780,ENSSSCG00000015549,ENSSSCG00000015897,ENSSSCG00000016512,ENSSSCG00000017614,ENSSSCG00000024867,ENSSSCG00000029005,ENSSSCG00000030108,…	TRIM26,N4BP1,ADAR,EIF2AK2,CXCL8,OAS2,OASL,IFIT1,IFIT5,PDE12,MX1,ENSSSCG00000014670,TRIM68,TRIM21,RNASEL,IFIH1,ZC3HAV1,TRIM25,ISG20,KPNA2,ZNFX1,TRIM38,PLSCR1,ENSSSCG00000038912,ISG15,OAS1
68	regulation of multicellular organismal process	GO:0051239	GO:BP	2179	832	166	ENSSSCG00000000006,ENSSSCG00000000475,ENSSSCG00000000753,ENSSSCG00000001453,ENSSSCG00000001595,ENSSSCG00000001710,ENSSSCG00000001727,ENSSSCG00000001909,ENSSSCG00000001912,ENSSSCG00000001920,ENSSSCG00000001952,ENSSSCG00000002516,ENSSSCG00000002841,ENSSSCG00000003419,ENSSSCG00000003439,ENSSSCG00000003669,ENSSSCG00000003748,ENSSSCG00000003788,ENSSSCG00000003805,ENSSSCG00000003832,ENSSSCG00000004154,…	PPARA,IRAK3,WNK1,HLA-DRA,DAAM2,RUNX2,TNFRSF21,STRA6,PML,HCN4,NFKBIA,WARS1,N4BP1,MAD2L2,DHRS3,MFSD2A,CELF4,PTGER3,PDE4B,TACSTD2,TNFAIP3,ADGRB3,SMAD7,LIPG,GATM,ENSSSCG00000004687,THBS1,ZNF516,NIN,LGALS3,CD274,JAK2,ABCA1,AGO2,ANGPT1,SDCBP,SELP,DDR2,SLAMF1,NTRK1,CRABP2,RXFP4,VCAM1,PCM1,IDO1,SLC20A2,ZNF335,PTGIS,ENSSSCG00000007527,ADRA2B,REL,EFEMP1,EIF2AK2,ROCK2,ADRA2C,TEC,CXCL8,SGMS2,SPP1,SLITRK5,TNF…
69	developmental process	GO:0032502	GO:BP	4715	832	297	ENSSSCG00000000006,ENSSSCG00000000197,ENSSSCG00000000206,ENSSSCG00000000217,ENSSSCG00000000396,ENSSSCG00000000475,ENSSSCG00000000625,ENSSSCG00000000700,ENSSSCG00000000753,ENSSSCG00000000950,ENSSSCG00000001252,ENSSSCG00000001382,ENSSSCG00000001453,ENSSSCG00000001567,ENSSSCG00000001595,ENSSSCG00000001710,ENSSSCG00000001727,ENSSSCG00000001750,ENSSSCG00000001909,ENSSSCG00000001912,ENSSSCG00000001952,…	PPARA,C1QL4,FAIM2,RACGAP1,STAT2,IRAK3,LRP6,ACRBP,WNK1,E2F7,UBD,DDR1,HLA-DRA,CPNE5,DAAM2,RUNX2,TNFRSF21,PAQR8,STRA6,PML,NFKBIA,HECTD1,RIOX1,PPP4R4,WARS1,TUBB3,ATP2C2,SALL1,PLEKHA4,MAD2L2,DHRS3,PUM1,MFSD2A,IMPACT,CELF4,DOCK7,TACSTD2,TAB2,TNFAIP3,RSPO3,ASF1A,ADGRB3,SMAD7,ZNF609,MAPK6,CEP152,THBS1,ZNF516,NIN,LGALS3,MLLT3,CD274,JAK2,RORB,TNC,SETX,AGO2,CCN3,ANGPT1,FZD6,VPS13B,SDCBP,GPR161,DDR2,UHMK1,SL…
70	regulation of macromolecule biosynthetic process	GO:0010556	GO:BP	4280	832	275	ENSSSCG00000000006,ENSSSCG00000000078,ENSSSCG00000000186,ENSSSCG00000000396,ENSSSCG00000000475,ENSSSCG00000000625,ENSSSCG00000000700,ENSSSCG00000000932,ENSSSCG00000000950,ENSSSCG00000001233,ENSSSCG00000001507,ENSSSCG00000001509,ENSSSCG00000001561,ENSSSCG00000001667,ENSSSCG00000001710,ENSSSCG00000001727,ENSSSCG00000001912,ENSSSCG00000001952,ENSSSCG00000001958,ENSSSCG00000002002,ENSSSCG00000002263,…	PPARA,TNRC6B,RHEBL1,STAT2,IRAK3,LRP6,ACRBP,NTS,E2F7,TRIM26,TAPBP,DAXX,ETV7,ZNF318,RUNX2,TNFRSF21,PML,NFKBIA,BAZ1A,IRF9,SLCO3A1,FUT8,RIOX1,WARS1,NFAT5,SALL1,N4BP1,EXOSC5,MED25,ZNF614,MAD2L2,PUM1,RLF,IMPACT,CELF4,PDE4B,ENSSSCG00000003989,HIVEP2,TNFAIP3,SMAD7,ZNF609,THBS1,ZNF516,MLLT3,CD274,JAK2,RORB,TLE4,NR4A3,TNC,TRAF1,SETX,AGO2,ATAD2,ANGPT1,FZD6,ZFHX4,SDCBP,DDR2,UHMK1,USF1,SLAMF1,NTRK1,ADAR,BCL9,…
71	negative regulation of viral genome replication	GO:0045071	GO:BP	36	832	16	ENSSSCG00000002841,ENSSSCG00000008496,ENSSSCG00000009881,ENSSSCG00000009921,ENSSSCG00000010452,ENSSSCG00000010454,ENSSSCG00000012077,ENSSSCG00000015549,ENSSSCG00000015897,ENSSSCG00000016512,ENSSSCG00000024867,ENSSSCG00000030108,ENSSSCG00000035634,ENSSSCG00000038912,ENSSSCG00000040575,ENSSSCG00000046640	N4BP1,EIF2AK2,OAS2,OASL,IFIT1,IFIT5,MX1,RNASEL,IFIH1,ZC3HAV1,ISG20,ZNFX1,PLSCR1,ENSSSCG00000038912,ISG15,OAS1
72	regulation of gene expression	GO:0010468	GO:BP	4183	832	269	ENSSSCG00000000006,ENSSSCG00000000078,ENSSSCG00000000186,ENSSSCG00000000396,ENSSSCG00000000475,ENSSSCG00000000625,ENSSSCG00000000700,ENSSSCG00000000932,ENSSSCG00000000950,ENSSSCG00000001233,ENSSSCG00000001507,ENSSSCG00000001509,ENSSSCG00000001561,ENSSSCG00000001667,ENSSSCG00000001710,ENSSSCG00000001727,ENSSSCG00000001912,ENSSSCG00000001952,ENSSSCG00000001958,ENSSSCG00000002002,ENSSSCG00000002263,…	PPARA,TNRC6B,RHEBL1,STAT2,IRAK3,LRP6,ACRBP,NTS,E2F7,TRIM26,TAPBP,DAXX,ETV7,ZNF318,RUNX2,TNFRSF21,PML,NFKBIA,BAZ1A,IRF9,SLCO3A1,FUT8,RIOX1,WARS1,NFAT5,SALL1,N4BP1,EXOSC5,MED25,ZNF614,MAD2L2,PUM1,RLF,IMPACT,CELF4,PDE4B,ENSSSCG00000003989,HIVEP2,TNFAIP3,SMAD7,ZNF609,THBS1,ZNF516,MLLT3,CD274,JAK2,RORB,TLE4,NR4A3,TNC,TRAF1,SETX,AGO2,ATAD2,ANGPT1,FZD6,ZFHX4,SDCBP,DDR2,UHMK1,USF1,SLAMF1,NTRK1,ADAR,BCL9,…
73	regulation of cell population proliferation	GO:0042127	GO:BP	1545	832	128	ENSSSCG00000000135,ENSSSCG00000000197,ENSSSCG00000000396,ENSSSCG00000000950,ENSSSCG00000001382,ENSSSCG00000001595,ENSSSCG00000001710,ENSSSCG00000001727,ENSSSCG00000001912,ENSSSCG00000001952,ENSSSCG00000003197,ENSSSCG00000003669,ENSSSCG00000003832,ENSSSCG00000004154,ENSSSCG00000004270,ENSSSCG00000004507,ENSSSCG00000004551,ENSSSCG00000004789,ENSSSCG00000005022,ENSSSCG00000005055,ENSSSCG00000005211,…	KCTD17,C1QL4,STAT2,E2F7,DDR1,DAAM2,RUNX2,TNFRSF21,PML,NFKBIA,MED25,MFSD2A,TACSTD2,TNFAIP3,ADGRB3,SMAD7,ZNF609,THBS1,NIN,LGALS3,CD274,JAK2,NR4A3,TNC,SETX,CCN3,ANGPT1,SDCBP,DDR2,SLAMF1,NTRK1,CRABP2,HIPK1,VCAM1,IDO1,ZNF335,EIF2AK2,STRN,BTC,CXCL11,ARHGAP24,MYCBP2,TNFSF13B,KIF13B,HMGB2,P2RX7,RET,NEURL1,TOPORS,BAMBI,JCAD,NRP1,APOD,MORC3,TIMP1,POLD4,CDC42EP2,MARK2,ICAM1,NACC1,IRF1,IL18,TNFSF18,VASH2,FRZ…
74	cytokine-mediated signaling pathway	GO:0019221	GO:BP	395	832	52	ENSSSCG00000000396,ENSSSCG00000000475,ENSSSCG00000000753,ENSSSCG00000000774,ENSSSCG00000001952,ENSSSCG00000005215,ENSSSCG00000005249,ENSSSCG00000005511,ENSSSCG00000006035,ENSSSCG00000006543,ENSSSCG00000006760,ENSSSCG00000007508,ENSSSCG00000008953,ENSSSCG00000008978,ENSSSCG00000009042,ENSSSCG00000009542,ENSSSCG00000009881,ENSSSCG00000011874,ENSSSCG00000011951,ENSSSCG00000012077,ENSSSCG00000012853,…	STAT2,IRAK3,WNK1,USP18,NFKBIA,JAK2,ENTREP1,TRAF1,ANGPT1,ADAR,HIPK1,ZBP1,CXCL8,CXCL11,OTUD4,TNFSF13B,OAS2,PARP14,NFKBIZ,MX1,IRF7,IRF1,IL18,TNFSF18,IFIH1,STAT1,LIFR,IL31RA,CCR7,IL6,RIPK2,MT3,SIGIRR,CX3CL1,PARP9,SAMHD1,SOCS1,CCL4,CXCL10,CXCL9,TRIM56,EDN1,ENSSSCG00000035736,WNT5A,TRAF6,ENSSSCG00000038912,NLRC5,GPR35,CYLD,ISG15,CCL8,OAS1
75	regulation of catalytic activity	GO:0050790	GO:BP	1322	832	114	ENSSSCG00000000475,ENSSSCG00000000625,ENSSSCG00000000753,ENSSSCG00000001463,ENSSSCG00000001509,ENSSSCG00000001912,ENSSSCG00000002474,ENSSSCG00000002516,ENSSSCG00000003112,ENSSSCG00000003419,ENSSSCG00000003818,ENSSSCG00000004110,ENSSSCG00000004154,ENSSSCG00000004225,ENSSSCG00000004507,ENSSSCG00000004789,ENSSSCG00000005215,ENSSSCG00000006035,ENSSSCG00000006338,ENSSSCG00000006380,ENSSSCG00000006464,…	IRAK3,LRP6,WNK1,PSMB9,DAXX,PML,PPP4R4,WARS1,BBC3,MAD2L2,DOCK7,TAB2,TNFAIP3,TPD52L1,SMAD7,THBS1,JAK2,ANGPT1,DDR2,SLAMF1,NTRK1,NES,ADAR,CTSS,RBL1,ENSSSCG00000007527,DCUN1D3,MLST8,ADRA2B,ROCK2,ADRA2C,ARAP2,BTC,SCARB2,ARHGAP24,HMBOX1,HMGB2,P2RX7,OAS2,OASL,RET,FAS,IFIT1,NEURL1,ADRA2A,DENND1B,TOPORS,C9orf72,USP6NL,PRKAR2A,RUBCN,HEG1,DTX3L,TIMP1,HMGCR,AP3B1,SPINK9,CHORDC1,ARHGAP42,IL18,PKP4,FZD5,EPHA4,N…
76	regulation of nucleobase-containing compound metabolic process	GO:0019219	GO:BP	3282	832	222	ENSSSCG00000000006,ENSSSCG00000000078,ENSSSCG00000000186,ENSSSCG00000000396,ENSSSCG00000000475,ENSSSCG00000000625,ENSSSCG00000000700,ENSSSCG00000000932,ENSSSCG00000000950,ENSSSCG00000001233,ENSSSCG00000001509,ENSSSCG00000001561,ENSSSCG00000001667,ENSSSCG00000001710,ENSSSCG00000001912,ENSSSCG00000001952,ENSSSCG00000001958,ENSSSCG00000002002,ENSSSCG00000002263,ENSSSCG00000002344,ENSSSCG00000002469,…	PPARA,TNRC6B,RHEBL1,STAT2,IRAK3,LRP6,ACRBP,NTS,E2F7,TRIM26,DAXX,ETV7,ZNF318,RUNX2,PML,NFKBIA,BAZ1A,IRF9,SLCO3A1,RIOX1,OTUB2,NFAT5,SALL1,EXOSC5,MED25,ZNF614,MAD2L2,PUM1,RLF,IMPACT,CELF4,ENSSSCG00000003989,HIVEP2,TNFAIP3,SMAD7,ZNF609,ZNF516,MLLT3,JAK2,RORB,TLE4,NR4A3,TRAF1,SETX,AGO2,ATAD2,FZD6,ZFHX4,SDCBP,DDR2,USF1,NTRK1,BCL9,MOV10,ENSSSCG00000007023,PLAGL2,RBL1,PTGIS,NFATC2IP,CIITA,ENSSSCG00000008…
77	positive regulation of multicellular organismal process	GO:0051240	GO:BP	1149	832	103	ENSSSCG00000000475,ENSSSCG00000001453,ENSSSCG00000001710,ENSSSCG00000001909,ENSSSCG00000003419,ENSSSCG00000003805,ENSSSCG00000004270,ENSSSCG00000004507,ENSSSCG00000004509,ENSSSCG00000004672,ENSSSCG00000004687,ENSSSCG00000004789,ENSSSCG00000004859,ENSSSCG00000005022,ENSSSCG00000005211,ENSSSCG00000005215,ENSSSCG00000005423,ENSSSCG00000005935,ENSSSCG00000006237,ENSSSCG00000006288,ENSSSCG00000006380,…	IRAK3,HLA-DRA,RUNX2,STRA6,MAD2L2,PDE4B,ADGRB3,SMAD7,LIPG,GATM,ENSSSCG00000004687,THBS1,ZNF516,NIN,CD274,JAK2,ABCA1,AGO2,SDCBP,SELP,SLAMF1,NTRK1,CRABP2,RXFP4,VCAM1,IDO1,SLC20A2,ZNF335,PTGIS,EIF2AK2,CXCL8,SPP1,SLITRK5,TNFSF13B,HMGB2,P2RX7,OAS2,RET,NEURL1,ADRA2A,DENND1B,BAMBI,NRP1,HMCES,CLSTN2,HEG1,NFKBIZ,OGT,ATP11C,IRF7,GAL,UNC93B1,AP3B1,IRF1,IL18,VASH2,IFIH1,STAT1,FZD5,NOS3,PTN,FST,DHX58,CCR7,TBX2…
78	regulation of intracellular signal transduction	GO:1902531	GO:BP	1248	832	109	ENSSSCG00000000006,ENSSSCG00000000197,ENSSSCG00000000457,ENSSSCG00000000475,ENSSSCG00000000932,ENSSSCG00000001252,ENSSSCG00000001523,ENSSSCG00000001912,ENSSSCG00000002755,ENSSSCG00000003112,ENSSSCG00000003601,ENSSSCG00000004110,ENSSSCG00000004154,ENSSSCG00000004225,ENSSSCG00000004789,ENSSSCG00000005215,ENSSSCG00000005423,ENSSSCG00000005511,ENSSSCG00000006002,ENSSSCG00000006035,ENSSSCG00000006380,…	PPARA,C1QL4,USP15,IRAK3,NTS,UBD,GRM4,PML,NFAT5,BBC3,HCRTR1,TAB2,TNFAIP3,TPD52L1,THBS1,JAK2,ABCA1,TRAF1,CCN3,ANGPT1,SLAMF1,NTRK1,PLAGL2,MLST8,ADRA2B,ENSSSCG00000008147,RNF149,SPRED2,REL,EIF2AK2,ADRA2C,TIFA,ARHGAP24,P2RX7,RET,FAS,IFIT5,ADRA2A,C9orf72,JCAD,NRP1,SKIL,HEG1,OGT,STARD8,ARHGEF18,ICAM1,HMGCR,ENSSSCG00000014670,TRIM68,TRIM21,ARHGAP42,IL18,DUSP4,STAT1,CFLAR,FZD5,EPHA4,CSF3,TRIM25,NF1,IL6,NM…
79	viral life cycle	GO:0019058	GO:BP	211	832	36	ENSSSCG00000001233,ENSSSCG00000002841,ENSSSCG00000006543,ENSSSCG00000007027,ENSSSCG00000008496,ENSSSCG00000008953,ENSSSCG00000009881,ENSSSCG00000009921,ENSSSCG00000010452,ENSSSCG00000010454,ENSSSCG00000011102,ENSSSCG00000011120,ENSSSCG00000011465,ENSSSCG00000012077,ENSSSCG00000013655,ENSSSCG00000014670,ENSSSCG00000014768,ENSSSCG00000014780,ENSSSCG00000015549,ENSSSCG00000015897,ENSSSCG00000016512,…	TRIM26,N4BP1,ADAR,SLC20A2,EIF2AK2,CXCL8,OAS2,OASL,IFIT1,IFIT5,NRP1,USP6NL,PDE12,MX1,ICAM1,ENSSSCG00000014670,TRIM68,TRIM21,RNASEL,IFIH1,ZC3HAV1,TRIM25,ISG20,UVRAG,KPNA2,ZNFX1,ZBED1,CHMP7,TRIM38,PLSCR1,ZC3H12A,ENSSSCG00000038912,FBXL2,ISG15,CCL8,OAS1
80	regulation of protein metabolic process	GO:0051246	GO:BP	1851	832	144	ENSSSCG00000000078,ENSSSCG00000000396,ENSSSCG00000000475,ENSSSCG00000000625,ENSSSCG00000001463,ENSSSCG00000001509,ENSSSCG00000001912,ENSSSCG00000001952,ENSSSCG00000002263,ENSSSCG00000002469,ENSSSCG00000002474,ENSSSCG00000002516,ENSSSCG00000002841,ENSSSCG00000003015,ENSSSCG00000003112,ENSSSCG00000003419,ENSSSCG00000003591,ENSSSCG00000003713,ENSSSCG00000003818,ENSSSCG00000003897,ENSSSCG00000004110,…	TNRC6B,STAT2,IRAK3,LRP6,PSMB9,DAXX,PML,NFKBIA,SLCO3A1,OTUB2,PPP4R4,WARS1,N4BP1,EXOSC5,BBC3,MAD2L2,PUM1,IMPACT,DOCK7,MOB3C,TAB2,TNFAIP3,TPD52L1,SMAD7,LIPG,THBS1,JAK2,AGO2,ANGPT1,SDCBP,DDR2,UHMK1,ADAR,CTSS,MOV10,PHF20,DCUN1D3,MLST8,ADRA2B,SPRED2,EIF2AK2,ROCK2,ADRA2C,BTC,OTUD4,MYCBP2,P2RX7,RET,FAS,NEURL1,ADRA2A,SAMD4B,TOPORS,C9orf72,NRP1,SMARCC1,PRKAR2A,PDE12,APOD,MELTF,HEG1,PARP14,DTX3L,ASB9,TIMP1,…
81	positive regulation of response to external stimulus	GO:0032103	GO:BP	419	832	53	ENSSSCG00000000457,ENSSSCG00000000475,ENSSSCG00000000753,ENSSSCG00000001952,ENSSSCG00000003591,ENSSSCG00000004154,ENSSSCG00000004789,ENSSSCG00000006380,ENSSSCG00000007007,ENSSSCG00000007508,ENSSSCG00000008496,ENSSSCG00000008953,ENSSSCG00000009042,ENSSSCG00000009129,ENSSSCG00000009469,ENSSSCG00000009704,ENSSSCG00000009720,ENSSSCG00000011102,ENSSSCG00000011951,ENSSSCG00000012853,ENSSSCG00000012893,…	USP15,IRAK3,WNK1,NFKBIA,PUM1,TNFAIP3,THBS1,SLAMF1,IDO1,ZBP1,EIF2AK2,CXCL8,OTUD4,TIFA,ACOD1,HMGB2,DDX60,NRP1,NFKBIZ,IRF7,UNC93B1,SLC15A3,AP3B1,IRF1,CXCL14,IL18,IFIH1,PTN,DHX58,CCR7,TRIM25,IL6,CGAS,NMI,TIRAP,SCG2,RIPK2,CX3CL1,TICAM1,PARP9,ZNFX1,ALPK1,CXCL10,TRIM56,C1QBP,PLSCR1,WNT5A,RAB7B,SNX4,TRAF6,NLRC5,FBXL2,OAS1
82	regulation of protein modification process	GO:0031399	GO:BP	1089	832	98	ENSSSCG00000000396,ENSSSCG00000000475,ENSSSCG00000000625,ENSSSCG00000001509,ENSSSCG00000001912,ENSSSCG00000002263,ENSSSCG00000002469,ENSSSCG00000002474,ENSSSCG00000002516,ENSSSCG00000002841,ENSSSCG00000003419,ENSSSCG00000003713,ENSSSCG00000003818,ENSSSCG00000003897,ENSSSCG00000004110,ENSSSCG00000004154,ENSSSCG00000004225,ENSSSCG00000004507,ENSSSCG00000004789,ENSSSCG00000005215,ENSSSCG00000006035,…	STAT2,IRAK3,LRP6,DAXX,PML,SLCO3A1,OTUB2,PPP4R4,WARS1,N4BP1,MAD2L2,IMPACT,DOCK7,MOB3C,TAB2,TNFAIP3,TPD52L1,SMAD7,THBS1,JAK2,ANGPT1,DDR2,ADAR,PHF20,DCUN1D3,MLST8,ADRA2B,SPRED2,ROCK2,ADRA2C,BTC,OTUD4,MYCBP2,P2RX7,RET,FAS,NEURL1,ADRA2A,TOPORS,C9orf72,NRP1,PRKAR2A,HEG1,PARP14,DTX3L,HUWE1,OGT,HCFC1,HMGCR,TRIM21,CHORDC1,IL18,TNFSF18,FZD5,EPHA4,ITGA1,IL31RA,FAM20A,CSF3,CDK12,IL6,NMI,TIRAP,PDGFRB,TARDBP,P…
83	viral genome replication	GO:0019079	GO:BP	91	832	23	ENSSSCG00000002841,ENSSSCG00000006543,ENSSSCG00000008496,ENSSSCG00000008953,ENSSSCG00000009881,ENSSSCG00000009921,ENSSSCG00000010452,ENSSSCG00000010454,ENSSSCG00000011465,ENSSSCG00000012077,ENSSSCG00000015549,ENSSSCG00000015897,ENSSSCG00000016512,ENSSSCG00000024867,ENSSSCG00000030108,ENSSSCG00000031130,ENSSSCG00000035634,ENSSSCG00000037815,ENSSSCG00000038912,ENSSSCG00000039802,ENSSSCG00000040575,…	N4BP1,ADAR,EIF2AK2,CXCL8,OAS2,OASL,IFIT1,IFIT5,PDE12,MX1,RNASEL,IFIH1,ZC3HAV1,ISG20,ZNFX1,ZBED1,PLSCR1,ZC3H12A,ENSSSCG00000038912,FBXL2,ISG15,CCL8,OAS1
84	viral process	GO:0016032	GO:BP	275	832	41	ENSSSCG00000000006,ENSSSCG00000001233,ENSSSCG00000002841,ENSSSCG00000006371,ENSSSCG00000006543,ENSSSCG00000007027,ENSSSCG00000008496,ENSSSCG00000008953,ENSSSCG00000009881,ENSSSCG00000009921,ENSSSCG00000010452,ENSSSCG00000010454,ENSSSCG00000011102,ENSSSCG00000011120,ENSSSCG00000011465,ENSSSCG00000012077,ENSSSCG00000013655,ENSSSCG00000014670,ENSSSCG00000014768,ENSSSCG00000014780,ENSSSCG00000015549,…	PPARA,TRIM26,N4BP1,USF1,ADAR,SLC20A2,EIF2AK2,CXCL8,OAS2,OASL,IFIT1,IFIT5,NRP1,USP6NL,PDE12,MX1,ICAM1,ENSSSCG00000014670,TRIM68,TRIM21,RNASEL,IFIH1,STAT1,ZC3HAV1,TRIM25,TARDBP,ISG20,UVRAG,KPNA2,ZNFX1,ZBED1,CHMP7,TRIM14,TRIM38,PLSCR1,ZC3H12A,ENSSSCG00000038912,FBXL2,ISG15,CCL8,OAS1
85	positive regulation of nucleobase-containing compound metabolic process	GO:0045935	GO:BP	1631	832	130	ENSSSCG00000000006,ENSSSCG00000000078,ENSSSCG00000000396,ENSSSCG00000000625,ENSSSCG00000000700,ENSSSCG00000000950,ENSSSCG00000001509,ENSSSCG00000001667,ENSSSCG00000001710,ENSSSCG00000001912,ENSSSCG00000001952,ENSSSCG00000001958,ENSSSCG00000002002,ENSSSCG00000002755,ENSSSCG00000002836,ENSSSCG00000003015,ENSSSCG00000003197,ENSSSCG00000003419,ENSSSCG00000003591,ENSSSCG00000003748,ENSSSCG00000003989,…	PPARA,TNRC6B,STAT2,LRP6,ACRBP,E2F7,DAXX,ZNF318,RUNX2,PML,NFKBIA,BAZ1A,IRF9,NFAT5,SALL1,EXOSC5,MED25,MAD2L2,PUM1,CELF4,ENSSSCG00000003989,ZNF609,ZNF516,MLLT3,JAK2,RORB,NR4A3,SETX,AGO2,ATAD2,USF1,BCL9,MOV10,PLAGL2,NFATC2IP,CIITA,TET3,REL,NCOA1,LYAR,OTUD4,JADE1,SPP1,ENSSSCG00000009240,HMBOX1,HMGB2,RET,NFKB2,STN1,SAMD4B,ZNF281,ELF3,TOPORS,BAMBI,SMARCC1,PDE12,HMCES,DTX3L,NFKBIZ,OGT,HCFC1,IRF7,GAL,EHF,…
86	regulation of viral genome replication	GO:0045069	GO:BP	61	832	19	ENSSSCG00000002841,ENSSSCG00000006543,ENSSSCG00000008496,ENSSSCG00000008953,ENSSSCG00000009881,ENSSSCG00000009921,ENSSSCG00000010452,ENSSSCG00000010454,ENSSSCG00000011465,ENSSSCG00000012077,ENSSSCG00000015549,ENSSSCG00000015897,ENSSSCG00000016512,ENSSSCG00000024867,ENSSSCG00000030108,ENSSSCG00000035634,ENSSSCG00000038912,ENSSSCG00000040575,ENSSSCG00000046640	N4BP1,ADAR,EIF2AK2,CXCL8,OAS2,OASL,IFIT1,IFIT5,PDE12,MX1,RNASEL,IFIH1,ZC3HAV1,ISG20,ZNFX1,PLSCR1,ENSSSCG00000038912,ISG15,OAS1
87	response to molecule of bacterial origin	GO:0002237	GO:BP	202	832	34	ENSSSCG00000000475,ENSSSCG00000001952,ENSSSCG00000003805,ENSSSCG00000004110,ENSSSCG00000004154,ENSSSCG00000005215,ENSSSCG00000005423,ENSSSCG00000007007,ENSSSCG00000008647,ENSSSCG00000008953,ENSSSCG00000009469,ENSSSCG00000009704,ENSSSCG00000009817,ENSSSCG00000011690,ENSSSCG00000011951,ENSSSCG00000015037,ENSSSCG00000016140,ENSSSCG00000016450,ENSSSCG00000017466,ENSSSCG00000020970,ENSSSCG00000022413,…	IRAK3,NFKBIA,PDE4B,TAB2,TNFAIP3,JAK2,ABCA1,IDO1,CMPK2,CXCL8,ACOD1,HMGB2,P2RX7,PLSCR4,NFKBIZ,IL18,FZD5,NOS3,CCR7,IL6,TIRAP,RIPK2,CX3CL1,TICAM1,TAP2,CASP7,CXCL10,PDCD1LG2,CXCL9,IRF8,F2R,WNT5A,ZC3H12A,TRAF6
88	positive regulation of response to biotic stimulus	GO:0002833	GO:BP	259	832	39	ENSSSCG00000000457,ENSSSCG00000000475,ENSSSCG00000001952,ENSSSCG00000003591,ENSSSCG00000004154,ENSSSCG00000005211,ENSSSCG00000007508,ENSSSCG00000008496,ENSSSCG00000009042,ENSSSCG00000009129,ENSSSCG00000009469,ENSSSCG00000009704,ENSSSCG00000009720,ENSSSCG00000011951,ENSSSCG00000012853,ENSSSCG00000012893,ENSSSCG00000013114,ENSSSCG00000014101,ENSSSCG00000014277,ENSSSCG00000015897,ENSSSCG00000017416,…	USP15,IRAK3,NFKBIA,PUM1,TNFAIP3,CD274,ZBP1,EIF2AK2,OTUD4,TIFA,ACOD1,HMGB2,DDX60,NFKBIZ,IRF7,UNC93B1,SLC15A3,AP3B1,IRF1,IFIH1,DHX58,TRIM25,CGAS,NMI,TIRAP,RIPK2,TICAM1,PARP9,ZNFX1,ALPK1,TRIM56,C1QBP,PLSCR1,WNT5A,RAB7B,TRAF6,NLRC5,FBXL2,OAS1
89	positive regulation of intracellular signal transduction	GO:1902533	GO:BP	719	832	73	ENSSSCG00000000932,ENSSSCG00000001252,ENSSSCG00000001523,ENSSSCG00000001912,ENSSSCG00000002755,ENSSSCG00000003112,ENSSSCG00000003601,ENSSSCG00000004110,ENSSSCG00000004225,ENSSSCG00000004789,ENSSSCG00000005215,ENSSSCG00000005511,ENSSSCG00000006035,ENSSSCG00000006380,ENSSSCG00000006464,ENSSSCG00000007243,ENSSSCG00000008044,ENSSSCG00000008122,ENSSSCG00000008388,ENSSSCG00000008496,ENSSSCG00000008703,…	NTS,UBD,GRM4,PML,NFAT5,BBC3,HCRTR1,TAB2,TPD52L1,THBS1,JAK2,TRAF1,ANGPT1,SLAMF1,NTRK1,PLAGL2,MLST8,ADRA2B,REL,EIF2AK2,ADRA2C,TIFA,P2RX7,RET,IFIT5,ADRA2A,JCAD,NRP1,SKIL,ICAM1,ENSSSCG00000014670,TRIM68,TRIM21,IL18,CFLAR,FZD5,EPHA4,CSF3,TRIM25,IL6,NMI,TIRAP,PDGFRB,RIPK2,MT3,CX3CL1,TICAM1,FGF1,DVL2,HIPK2,CASP10,EZH2,PIM2,SESN2,IGF1R,ALPK1,CCL4,GDF15,TRIM56,C1QBP,TRIM38,F2R,EDN1,ENSSSCG00000035736,WNT5…
90	positive regulation of cellular biosynthetic process	GO:0031328	GO:BP	2101	832	155	ENSSSCG00000000006,ENSSSCG00000000396,ENSSSCG00000000475,ENSSSCG00000000625,ENSSSCG00000000700,ENSSSCG00000000932,ENSSSCG00000000950,ENSSSCG00000001509,ENSSSCG00000001667,ENSSSCG00000001710,ENSSSCG00000001952,ENSSSCG00000002002,ENSSSCG00000002516,ENSSSCG00000002755,ENSSSCG00000002836,ENSSSCG00000003197,ENSSSCG00000003419,ENSSSCG00000003669,ENSSSCG00000003713,ENSSSCG00000003748,ENSSSCG00000003805,…	PPARA,STAT2,IRAK3,LRP6,ACRBP,NTS,E2F7,DAXX,ZNF318,RUNX2,NFKBIA,IRF9,WARS1,NFAT5,SALL1,MED25,MAD2L2,MFSD2A,IMPACT,CELF4,PDE4B,ENSSSCG00000003989,ZNF609,THBS1,ZNF516,MLLT3,CD274,JAK2,RORB,NR4A3,TNC,SETX,AGO2,ATAD2,ANGPT1,UHMK1,USF1,SLAMF1,ADAR,BCL9,IDO1,PLAGL2,NFATC2IP,CIITA,TET3,REL,EIF2AK2,NCOA1,NBAS,ROCK2,LYAR,CXCL8,JADE1,SPP1,ENSSSCG00000009240,HMBOX1,HMGB2,P2RX7,OAS2,RET,BLNK,NFKB2,ADRA2A,DENN…
91	regulation of phosphorylation	GO:0042325	GO:BP	878	832	83	ENSSSCG00000000396,ENSSSCG00000000475,ENSSSCG00000000625,ENSSSCG00000001509,ENSSSCG00000002263,ENSSSCG00000002516,ENSSSCG00000003419,ENSSSCG00000003713,ENSSSCG00000003818,ENSSSCG00000003897,ENSSSCG00000004110,ENSSSCG00000004154,ENSSSCG00000004225,ENSSSCG00000004507,ENSSSCG00000004789,ENSSSCG00000005215,ENSSSCG00000006035,ENSSSCG00000006237,ENSSSCG00000006338,ENSSSCG00000006464,ENSSSCG00000006543,…	STAT2,IRAK3,LRP6,DAXX,SLCO3A1,WARS1,MAD2L2,IMPACT,DOCK7,MOB3C,TAB2,TNFAIP3,TPD52L1,SMAD7,THBS1,JAK2,ANGPT1,SDCBP,DDR2,NTRK1,ADAR,RBL1,MLST8,ADRA2B,SPRED2,ROCK2,ADRA2C,BTC,P2RX7,RET,FAS,NEURL1,ADRA2A,C9orf72,NRP1,PRKAR2A,RUBCN,HEG1,PARP14,HMGCR,CHORDC1,IL18,TNFSF18,FZD5,EPHA4,IL31RA,FAM20A,CSF3,CDK12,IL6,TIRAP,PDGFRB,TARDBP,PRKCD,RIPK2,TIGAR,MT3,CX3CL1,FGF1,DVL2,PTPN13,HIPK2,PARP9,SOCS1,EZH2,UVRAG…
92	regulation of RNA metabolic process	GO:0051252	GO:BP	3044	832	205	ENSSSCG00000000006,ENSSSCG00000000078,ENSSSCG00000000186,ENSSSCG00000000396,ENSSSCG00000000475,ENSSSCG00000000625,ENSSSCG00000000700,ENSSSCG00000000932,ENSSSCG00000000950,ENSSSCG00000001233,ENSSSCG00000001509,ENSSSCG00000001561,ENSSSCG00000001667,ENSSSCG00000001710,ENSSSCG00000001912,ENSSSCG00000001952,ENSSSCG00000001958,ENSSSCG00000002002,ENSSSCG00000002263,ENSSSCG00000002344,ENSSSCG00000002755,…	PPARA,TNRC6B,RHEBL1,STAT2,IRAK3,LRP6,ACRBP,NTS,E2F7,TRIM26,DAXX,ETV7,ZNF318,RUNX2,PML,NFKBIA,BAZ1A,IRF9,SLCO3A1,RIOX1,NFAT5,SALL1,EXOSC5,MED25,ZNF614,MAD2L2,PUM1,RLF,IMPACT,CELF4,ENSSSCG00000003989,HIVEP2,TNFAIP3,SMAD7,ZNF609,ZNF516,MLLT3,JAK2,RORB,TLE4,NR4A3,TRAF1,SETX,AGO2,ATAD2,FZD6,ZFHX4,SDCBP,DDR2,USF1,NTRK1,BCL9,MOV10,ENSSSCG00000007023,PLAGL2,RBL1,PTGIS,NFATC2IP,CIITA,ENSSSCG00000008147,TE…
93	regulation of phosphate metabolic process	GO:0019220	GO:BP	992	832	90	ENSSSCG00000000006,ENSSSCG00000000396,ENSSSCG00000000475,ENSSSCG00000000625,ENSSSCG00000001509,ENSSSCG00000002263,ENSSSCG00000002474,ENSSSCG00000002516,ENSSSCG00000003419,ENSSSCG00000003669,ENSSSCG00000003713,ENSSSCG00000003818,ENSSSCG00000003897,ENSSSCG00000004110,ENSSSCG00000004154,ENSSSCG00000004225,ENSSSCG00000004507,ENSSSCG00000004789,ENSSSCG00000005215,ENSSSCG00000006035,ENSSSCG00000006237,…	PPARA,STAT2,IRAK3,LRP6,DAXX,SLCO3A1,PPP4R4,WARS1,MAD2L2,MFSD2A,IMPACT,DOCK7,MOB3C,TAB2,TNFAIP3,TPD52L1,SMAD7,THBS1,JAK2,ANGPT1,SDCBP,DDR2,NTRK1,ADAR,RBL1,MLST8,ABCA3,ADRA2B,SPRED2,ROCK2,ADRA2C,BTC,P2RX7,RET,FAS,NEURL1,ADRA2A,C9orf72,NRP1,PRKAR2A,RUBCN,HEG1,PARP14,HMGCR,CHORDC1,IL18,TNFSF18,FZD5,ACSL3,EPHA4,NOS3,ITGA1,IL31RA,FAM20A,CSF3,CDK12,IL6,TIRAP,PDGFRB,TARDBP,PRKCD,RIPK2,TIGAR,MT3,CX3CL1,FG…
94	regulation of phosphorus metabolic process	GO:0051174	GO:BP	992	832	90	ENSSSCG00000000006,ENSSSCG00000000396,ENSSSCG00000000475,ENSSSCG00000000625,ENSSSCG00000001509,ENSSSCG00000002263,ENSSSCG00000002474,ENSSSCG00000002516,ENSSSCG00000003419,ENSSSCG00000003669,ENSSSCG00000003713,ENSSSCG00000003818,ENSSSCG00000003897,ENSSSCG00000004110,ENSSSCG00000004154,ENSSSCG00000004225,ENSSSCG00000004507,ENSSSCG00000004789,ENSSSCG00000005215,ENSSSCG00000006035,ENSSSCG00000006237,…	PPARA,STAT2,IRAK3,LRP6,DAXX,SLCO3A1,PPP4R4,WARS1,MAD2L2,MFSD2A,IMPACT,DOCK7,MOB3C,TAB2,TNFAIP3,TPD52L1,SMAD7,THBS1,JAK2,ANGPT1,SDCBP,DDR2,NTRK1,ADAR,RBL1,MLST8,ABCA3,ADRA2B,SPRED2,ROCK2,ADRA2C,BTC,P2RX7,RET,FAS,NEURL1,ADRA2A,C9orf72,NRP1,PRKAR2A,RUBCN,HEG1,PARP14,HMGCR,CHORDC1,IL18,TNFSF18,FZD5,ACSL3,EPHA4,NOS3,ITGA1,IL31RA,FAM20A,CSF3,CDK12,IL6,TIRAP,PDGFRB,TARDBP,PRKCD,RIPK2,TIGAR,MT3,CX3CL1,FG…
95	positive regulation of biosynthetic process	GO:0009891	GO:BP	2115	832	155	ENSSSCG00000000006,ENSSSCG00000000396,ENSSSCG00000000475,ENSSSCG00000000625,ENSSSCG00000000700,ENSSSCG00000000932,ENSSSCG00000000950,ENSSSCG00000001509,ENSSSCG00000001667,ENSSSCG00000001710,ENSSSCG00000001952,ENSSSCG00000002002,ENSSSCG00000002516,ENSSSCG00000002755,ENSSSCG00000002836,ENSSSCG00000003197,ENSSSCG00000003419,ENSSSCG00000003669,ENSSSCG00000003713,ENSSSCG00000003748,ENSSSCG00000003805,…	PPARA,STAT2,IRAK3,LRP6,ACRBP,NTS,E2F7,DAXX,ZNF318,RUNX2,NFKBIA,IRF9,WARS1,NFAT5,SALL1,MED25,MAD2L2,MFSD2A,IMPACT,CELF4,PDE4B,ENSSSCG00000003989,ZNF609,THBS1,ZNF516,MLLT3,CD274,JAK2,RORB,NR4A3,TNC,SETX,AGO2,ATAD2,ANGPT1,UHMK1,USF1,SLAMF1,ADAR,BCL9,IDO1,PLAGL2,NFATC2IP,CIITA,TET3,REL,EIF2AK2,NCOA1,NBAS,ROCK2,LYAR,CXCL8,JADE1,SPP1,ENSSSCG00000009240,HMBOX1,HMGB2,P2RX7,OAS2,RET,BLNK,NFKB2,ADRA2A,DENN…
96	positive regulation of macromolecule biosynthetic process	GO:0010557	GO:BP	2044	832	151	ENSSSCG00000000006,ENSSSCG00000000396,ENSSSCG00000000475,ENSSSCG00000000625,ENSSSCG00000000700,ENSSSCG00000000932,ENSSSCG00000000950,ENSSSCG00000001509,ENSSSCG00000001667,ENSSSCG00000001710,ENSSSCG00000001952,ENSSSCG00000002002,ENSSSCG00000002516,ENSSSCG00000002755,ENSSSCG00000002836,ENSSSCG00000003197,ENSSSCG00000003419,ENSSSCG00000003713,ENSSSCG00000003748,ENSSSCG00000003805,ENSSSCG00000003989,…	PPARA,STAT2,IRAK3,LRP6,ACRBP,NTS,E2F7,DAXX,ZNF318,RUNX2,NFKBIA,IRF9,WARS1,NFAT5,SALL1,MED25,MAD2L2,IMPACT,CELF4,PDE4B,ENSSSCG00000003989,ZNF609,THBS1,ZNF516,MLLT3,CD274,JAK2,RORB,NR4A3,TNC,SETX,AGO2,ATAD2,ANGPT1,UHMK1,USF1,SLAMF1,ADAR,BCL9,IDO1,PLAGL2,NFATC2IP,CIITA,TET3,REL,EIF2AK2,NCOA1,NBAS,ROCK2,LYAR,CXCL8,JADE1,SPP1,ENSSSCG00000009240,HMBOX1,HMGB2,P2RX7,OAS2,RET,BLNK,NFKB2,ADRA2A,DENND1B,ZNF…
97	regulation of DNA-binding transcription factor activity	GO:0051090	GO:BP	342	832	45	ENSSSCG00000000186,ENSSSCG00000000475,ENSSSCG00000000625,ENSSSCG00000000932,ENSSSCG00000001233,ENSSSCG00000001952,ENSSSCG00000002263,ENSSSCG00000003419,ENSSSCG00000004154,ENSSSCG00000004507,ENSSSCG00000005511,ENSSSCG00000006052,ENSSSCG00000006338,ENSSSCG00000006464,ENSSSCG00000007463,ENSSSCG00000008496,ENSSSCG00000014670,ENSSSCG00000014768,ENSSSCG00000014780,ENSSSCG00000015037,ENSSSCG00000017488,…	RHEBL1,IRAK3,LRP6,NTS,TRIM26,NFKBIA,SLCO3A1,MAD2L2,TNFAIP3,SMAD7,TRAF1,FZD6,DDR2,NTRK1,PTGIS,EIF2AK2,ENSSSCG00000014670,TRIM68,TRIM21,IL18,CSF3,TRIM25,MED13,IL6,TIRAP,RIPK2,SIGIRR,CX3CL1,TICAM1,DVL2,HIPK2,EZH2,TRIM14,TRIM38,EDN1,WNT5A,RAB7B,RWDD3,CTNNBIP1,ZC3H12A,TRAF6,HEYL,BMP2,NLRC5,CYLD
98	response to lipopolysaccharide	GO:0032496	GO:BP	190	832	32	ENSSSCG00000000475,ENSSSCG00000001952,ENSSSCG00000003805,ENSSSCG00000004110,ENSSSCG00000004154,ENSSSCG00000005215,ENSSSCG00000005423,ENSSSCG00000007007,ENSSSCG00000008647,ENSSSCG00000008953,ENSSSCG00000009469,ENSSSCG00000009704,ENSSSCG00000009817,ENSSSCG00000011690,ENSSSCG00000011951,ENSSSCG00000015037,ENSSSCG00000016450,ENSSSCG00000017466,ENSSSCG00000020970,ENSSSCG00000022413,ENSSSCG00000024096,…	IRAK3,NFKBIA,PDE4B,TAB2,TNFAIP3,JAK2,ABCA1,IDO1,CMPK2,CXCL8,ACOD1,HMGB2,P2RX7,PLSCR4,NFKBIZ,IL18,NOS3,CCR7,IL6,TIRAP,RIPK2,CX3CL1,TICAM1,CASP7,CXCL10,PDCD1LG2,CXCL9,IRF8,F2R,WNT5A,ZC3H12A,TRAF6
99	regulation of developmental process	GO:0050793	GO:BP	1790	832	136	ENSSSCG00000000006,ENSSSCG00000000197,ENSSSCG00000000396,ENSSSCG00000001453,ENSSSCG00000001567,ENSSSCG00000001595,ENSSSCG00000001710,ENSSSCG00000001727,ENSSSCG00000001912,ENSSSCG00000001952,ENSSSCG00000002344,ENSSSCG00000002516,ENSSSCG00000003137,ENSSSCG00000003419,ENSSSCG00000003669,ENSSSCG00000003713,ENSSSCG00000003748,ENSSSCG00000003832,ENSSSCG00000004154,ENSSSCG00000004270,ENSSSCG00000004507,…	PPARA,C1QL4,STAT2,HLA-DRA,CPNE5,DAAM2,RUNX2,TNFRSF21,PML,NFKBIA,RIOX1,WARS1,PLEKHA4,MAD2L2,MFSD2A,IMPACT,CELF4,TACSTD2,TNFAIP3,ADGRB3,SMAD7,MAPK6,THBS1,NIN,MLLT3,RORB,AGO2,CCN3,FZD6,SDCBP,DDR2,NTRK1,CRABP2,PCM1,SLC20A2,ZNF335,PTGIS,ADRA2B,EFEMP1,EIF2AK2,NCOA1,ROCK2,ADRA2C,CXCL8,SGMS2,MYCBP2,SLITRK5,TNFSF13B,S1PR3,KIF13B,HMGB2,P2RX7,RET,TLL2,NEURL1,BAMBI,NRP1,HMCES,NPHP3,CLSTN2,SKIL,NFKBIZ,BCOR,HU…
100	positive regulation of innate immune response	GO:0045089	GO:BP	236	832	36	ENSSSCG00000000457,ENSSSCG00000000475,ENSSSCG00000001952,ENSSSCG00000003591,ENSSSCG00000004154,ENSSSCG00000007508,ENSSSCG00000008496,ENSSSCG00000009042,ENSSSCG00000009129,ENSSSCG00000009704,ENSSSCG00000009720,ENSSSCG00000011951,ENSSSCG00000012853,ENSSSCG00000012893,ENSSSCG00000013114,ENSSSCG00000014101,ENSSSCG00000014277,ENSSSCG00000015897,ENSSSCG00000017416,ENSSSCG00000017614,ENSSSCG00000021383,…	USP15,IRAK3,NFKBIA,PUM1,TNFAIP3,ZBP1,EIF2AK2,OTUD4,TIFA,HMGB2,DDX60,NFKBIZ,IRF7,UNC93B1,SLC15A3,AP3B1,IRF1,IFIH1,DHX58,TRIM25,CGAS,NMI,TIRAP,RIPK2,TICAM1,PARP9,ZNFX1,ALPK1,TRIM56,C1QBP,PLSCR1,WNT5A,RAB7B,NLRC5,FBXL2,OAS1
101	positive regulation of defense response	GO:0031349	GO:BP	321	832	43	ENSSSCG00000000457,ENSSSCG00000000475,ENSSSCG00000001952,ENSSSCG00000003591,ENSSSCG00000004154,ENSSSCG00000007007,ENSSSCG00000007508,ENSSSCG00000008496,ENSSSCG00000009042,ENSSSCG00000009129,ENSSSCG00000009469,ENSSSCG00000009704,ENSSSCG00000009720,ENSSSCG00000011951,ENSSSCG00000012853,ENSSSCG00000012893,ENSSSCG00000013114,ENSSSCG00000014101,ENSSSCG00000014277,ENSSSCG00000015037,ENSSSCG00000015897,…	USP15,IRAK3,NFKBIA,PUM1,TNFAIP3,IDO1,ZBP1,EIF2AK2,OTUD4,TIFA,ACOD1,HMGB2,DDX60,NFKBIZ,IRF7,UNC93B1,SLC15A3,AP3B1,IRF1,IL18,IFIH1,DHX58,CCR7,TRIM25,IL6,CGAS,NMI,TIRAP,RIPK2,CX3CL1,TICAM1,PARP9,ZNFX1,ALPK1,TRIM56,C1QBP,PLSCR1,WNT5A,RAB7B,SNX4,NLRC5,FBXL2,OAS1
102	cellular response to stimulus	GO:0051716	GO:BP	7091	832	397	ENSSSCG00000000006,ENSSSCG00000000061,ENSSSCG00000000186,ENSSSCG00000000197,ENSSSCG00000000206,ENSSSCG00000000217,ENSSSCG00000000396,ENSSSCG00000000457,ENSSSCG00000000475,ENSSSCG00000000623,ENSSSCG00000000625,ENSSSCG00000000661,ENSSSCG00000000753,ENSSSCG00000000774,ENSSSCG00000000932,ENSSSCG00000000950,ENSSSCG00000001252,ENSSSCG00000001382,ENSSSCG00000001509,ENSSSCG00000001516,ENSSSCG00000001523,…	PPARA,PMM1,RHEBL1,C1QL4,FAIM2,RACGAP1,STAT2,USP15,IRAK3,BCL2L14,LRP6,PHC1,WNK1,USP18,NTS,E2F7,UBD,DDR1,DAXX,ENSSSCG00000001516,GRM4,CPNE5,DAAM2,RUNX2,TNFRSF21,PAQR8,CYP1A1,PML,HCN4,NFKBIA,FUT8,ZFYVE26,SUSD6,OTUB2,TUBB3,MLKL,NFAT5,SALL1,N4BP1,BBC3,PLEKHA4,MAD2L2,NPPB,DHRS3,PUM1,HCRTR1,MFSD2A,IMPACT,CELF4,PTGER3,PDE4B,DOCK7,MOB3C,TAB2,TNFAIP3,RSPO3,TPD52L1,ASF1A,ADGRB3,SMAD7,MAPK6,WDR76,TTBK2,THBS1…
103	cytokine production	GO:0001816	GO:BP	570	832	61	ENSSSCG00000000006,ENSSSCG00000000475,ENSSSCG00000001727,ENSSSCG00000001912,ENSSSCG00000002841,ENSSSCG00000003805,ENSSSCG00000004154,ENSSSCG00000004507,ENSSSCG00000004789,ENSSSCG00000005211,ENSSSCG00000005215,ENSSSCG00000006035,ENSSSCG00000006380,ENSSSCG00000007007,ENSSSCG00000008388,ENSSSCG00000008496,ENSSSCG00000009580,ENSSSCG00000009704,ENSSSCG00000009817,ENSSSCG00000009881,ENSSSCG00000010629,…	PPARA,IRAK3,TNFRSF21,PML,N4BP1,PDE4B,TNFAIP3,SMAD7,THBS1,CD274,JAK2,ANGPT1,SLAMF1,IDO1,REL,EIF2AK2,S1PR3,HMGB2,P2RX7,OAS2,ADRA2A,DENND1B,APOD,HEG1,MORC3,IRF7,UNC93B1,IRF1,IL18,IFIH1,STAT1,FZD5,DHX58,CCR7,TBX21,ENSSSCG00000017754,IL6,CGAS,NMI,TIRAP,NRROS,RIPK2,SIGIRR,CX3CL1,TICAM1,GBP1,IL17D,SOCS1,PANX1,PDCD1LG2,IRF8,C1QBP,F2R,WNT5A,RAB7B,ZC3H12A,TRAF6,MAPK13,IL27,ISG15,OAS1
104	inflammatory response	GO:0006954	GO:BP	528	832	58	ENSSSCG00000000006,ENSSSCG00000000774,ENSSSCG00000001952,ENSSSCG00000003788,ENSSSCG00000004110,ENSSSCG00000004154,ENSSSCG00000004789,ENSSSCG00000005215,ENSSSCG00000005494,ENSSSCG00000006002,ENSSSCG00000006288,ENSSSCG00000006380,ENSSSCG00000006862,ENSSSCG00000007007,ENSSSCG00000007463,ENSSSCG00000008496,ENSSSCG00000008953,ENSSSCG00000009580,ENSSSCG00000009704,ENSSSCG00000009817,ENSSSCG00000010922,…	PPARA,USP18,NFKBIA,PTGER3,TAB2,TNFAIP3,THBS1,JAK2,TNC,CCN3,SELP,SLAMF1,VCAM1,IDO1,PTGIS,EIF2AK2,CXCL8,S1PR3,HMGB2,P2RX7,ELF3,APOD,NFKBIZ,TIMP1,AP3B1,IL18,PTN,IL31RA,CCR7,IL6,NMI,TIRAP,NRROS,TNFAIP6,SIGIRR,CX3CL1,TICAM1,IL17D,VPS54,IER3,FNDC4,PLA2G2D,CCL4,CXCL10,CXCL9,F2R,ENSSSCG00000035736,WNT5A,SNX4,CTNNBIP1,FEM1A,ZC3H12A,SNAP23,BMP2,FBXL2,CYLD,CCL8,GPR17
105	response to bacterium	GO:0009617	GO:BP	460	832	53	ENSSSCG00000000475,ENSSSCG00000001549,ENSSSCG00000001952,ENSSSCG00000003763,ENSSSCG00000003805,ENSSSCG00000004110,ENSSSCG00000004154,ENSSSCG00000005215,ENSSSCG00000005423,ENSSSCG00000005638,ENSSSCG00000006923,ENSSSCG00000007007,ENSSSCG00000008647,ENSSSCG00000008953,ENSSSCG00000009469,ENSSSCG00000009704,ENSSSCG00000009817,ENSSSCG00000009881,ENSSSCG00000011690,ENSSSCG00000011951,ENSSSCG00000013418,…	IRAK3,FKBP5,NFKBIA,IFI44,PDE4B,TAB2,TNFAIP3,JAK2,ABCA1,LCN2,GBP2,IDO1,CMPK2,CXCL8,ACOD1,HMGB2,P2RX7,OAS2,PLSCR4,NFKBIZ,CFD,IL18,FZD5,NOS3,FAM20A,DHX58,CCR7,IL6,TIRAP,FCN2,PRKCD,RIPK2,CX3CL1,TICAM1,TAP2,DEFB1,ZNFX1,ENSSSCG00000030801,CASP7,CXCL10,PDCD1LG2,CXCL9,AQP1,IRF8,F2R,WNT5A,ZC3H12A,CPSF6,TRAF6,BMP2,NLRC5,ISG15,OAS1
106	positive regulation of protein modification process	GO:0031401	GO:BP	683	832	68	ENSSSCG00000001509,ENSSSCG00000001912,ENSSSCG00000002263,ENSSSCG00000003419,ENSSSCG00000003818,ENSSSCG00000003897,ENSSSCG00000004110,ENSSSCG00000004225,ENSSSCG00000004507,ENSSSCG00000004789,ENSSSCG00000005215,ENSSSCG00000006035,ENSSSCG00000006338,ENSSSCG00000007311,ENSSSCG00000007854,ENSSSCG00000008044,ENSSSCG00000008122,ENSSSCG00000008629,ENSSSCG00000008703,ENSSSCG00000008965,ENSSSCG00000009473,…	DAXX,PML,SLCO3A1,MAD2L2,DOCK7,MOB3C,TAB2,TPD52L1,SMAD7,THBS1,JAK2,ANGPT1,DDR2,PHF20,DCUN1D3,MLST8,ADRA2B,ROCK2,ADRA2C,BTC,MYCBP2,P2RX7,RET,FAS,NEURL1,ADRA2A,TOPORS,NRP1,PARP14,HUWE1,OGT,HCFC1,IL18,TNFSF18,FZD5,EPHA4,ITGA1,IL31RA,FAM20A,CSF3,IL6,NMI,TIRAP,PDGFRB,PRKCD,RIPK2,MT3,CX3CL1,TICAM1,FGF1,DVL2,HIPK2,BIRC3,PARP9,SOCS1,EZH2,SESN2,STK4,RASSF5,EDN1,ECT2,WNT5A,RWDD3,ZC3H12A,TRAF6,APLNR,BMP2,OPR…
107	regulation of cytokine production	GO:0001817	GO:BP	566	832	60	ENSSSCG00000000006,ENSSSCG00000000475,ENSSSCG00000001727,ENSSSCG00000001912,ENSSSCG00000002841,ENSSSCG00000003805,ENSSSCG00000004154,ENSSSCG00000004507,ENSSSCG00000004789,ENSSSCG00000005211,ENSSSCG00000005215,ENSSSCG00000006035,ENSSSCG00000006380,ENSSSCG00000007007,ENSSSCG00000008388,ENSSSCG00000008496,ENSSSCG00000009580,ENSSSCG00000009704,ENSSSCG00000009817,ENSSSCG00000009881,ENSSSCG00000010629,…	PPARA,IRAK3,TNFRSF21,PML,N4BP1,PDE4B,TNFAIP3,SMAD7,THBS1,CD274,JAK2,ANGPT1,SLAMF1,IDO1,REL,EIF2AK2,S1PR3,HMGB2,P2RX7,OAS2,ADRA2A,DENND1B,APOD,HEG1,MORC3,IRF7,UNC93B1,IRF1,IL18,IFIH1,STAT1,FZD5,DHX58,CCR7,TBX21,ENSSSCG00000017754,IL6,CGAS,NMI,TIRAP,RIPK2,SIGIRR,CX3CL1,TICAM1,GBP1,IL17D,SOCS1,PANX1,PDCD1LG2,IRF8,C1QBP,F2R,WNT5A,RAB7B,ZC3H12A,TRAF6,MAPK13,IL27,ISG15,OAS1
108	cellular response to type I interferon	GO:0071357	GO:BP	50	832	16	ENSSSCG00000000396,ENSSSCG00000000774,ENSSSCG00000006543,ENSSSCG00000007508,ENSSSCG00000010452,ENSSSCG00000012077,ENSSSCG00000012853,ENSSSCG00000015897,ENSSSCG00000016057,ENSSSCG00000027806,ENSSSCG00000034347,ENSSSCG00000035859,ENSSSCG00000038912,ENSSSCG00000039751,ENSSSCG00000040575,ENSSSCG00000046640	STAT2,USP18,ADAR,ZBP1,IFIT1,MX1,IRF7,IFIH1,STAT1,SAMHD1,TRIM56,WNT5A,ENSSSCG00000038912,NLRC5,ISG15,OAS1
109	positive regulation of RNA metabolic process	GO:0051254	GO:BP	1473	832	116	ENSSSCG00000000006,ENSSSCG00000000078,ENSSSCG00000000396,ENSSSCG00000000625,ENSSSCG00000000700,ENSSSCG00000000950,ENSSSCG00000001509,ENSSSCG00000001667,ENSSSCG00000001710,ENSSSCG00000001952,ENSSSCG00000002002,ENSSSCG00000002755,ENSSSCG00000002836,ENSSSCG00000003015,ENSSSCG00000003197,ENSSSCG00000003419,ENSSSCG00000003591,ENSSSCG00000003748,ENSSSCG00000003989,ENSSSCG00000004551,ENSSSCG00000004859,…	PPARA,TNRC6B,STAT2,LRP6,ACRBP,E2F7,DAXX,ZNF318,RUNX2,NFKBIA,IRF9,NFAT5,SALL1,EXOSC5,MED25,MAD2L2,PUM1,CELF4,ENSSSCG00000003989,ZNF609,ZNF516,MLLT3,JAK2,RORB,NR4A3,SETX,AGO2,ATAD2,USF1,BCL9,MOV10,PLAGL2,NFATC2IP,CIITA,TET3,REL,NCOA1,LYAR,JADE1,SPP1,ENSSSCG00000009240,HMBOX1,HMGB2,RET,NFKB2,SAMD4B,ZNF281,ELF3,TOPORS,BAMBI,SMARCC1,PDE12,DTX3L,NFKBIZ,OGT,HCFC1,IRF7,GAL,EHF,AP3B1,DCP2,IRF1,TRIM21,NUP9…
110	regulation of protein phosphorylation	GO:0001932	GO:BP	795	832	75	ENSSSCG00000000396,ENSSSCG00000000475,ENSSSCG00000000625,ENSSSCG00000001509,ENSSSCG00000002263,ENSSSCG00000002516,ENSSSCG00000003419,ENSSSCG00000003713,ENSSSCG00000003818,ENSSSCG00000003897,ENSSSCG00000004110,ENSSSCG00000004154,ENSSSCG00000004225,ENSSSCG00000004507,ENSSSCG00000004789,ENSSSCG00000005215,ENSSSCG00000006035,ENSSSCG00000006338,ENSSSCG00000006543,ENSSSCG00000008044,ENSSSCG00000008122,…	STAT2,IRAK3,LRP6,DAXX,SLCO3A1,WARS1,MAD2L2,IMPACT,DOCK7,MOB3C,TAB2,TNFAIP3,TPD52L1,SMAD7,THBS1,JAK2,ANGPT1,DDR2,ADAR,MLST8,ADRA2B,SPRED2,ROCK2,ADRA2C,BTC,P2RX7,RET,FAS,NEURL1,ADRA2A,C9orf72,NRP1,PRKAR2A,HEG1,PARP14,HMGCR,CHORDC1,IL18,TNFSF18,FZD5,EPHA4,IL31RA,FAM20A,CSF3,CDK12,IL6,TIRAP,TARDBP,PRKCD,RIPK2,MT3,CX3CL1,FGF1,DVL2,PTPN13,HIPK2,PARP9,SOCS1,EZH2,UVRAG,SESN2,INPP5J,STK4,DUSP16,EDN1,ECT2,…
111	negative regulation of innate immune response	GO:0045824	GO:BP	58	832	17	ENSSSCG00000000396,ENSSSCG00000000457,ENSSSCG00000000475,ENSSSCG00000000774,ENSSSCG00000004154,ENSSSCG00000006543,ENSSSCG00000008729,ENSSSCG00000009886,ENSSSCG00000011874,ENSSSCG00000014780,ENSSSCG00000017416,ENSSSCG00000021383,ENSSSCG00000022011,ENSSSCG00000027806,ENSSSCG00000039751,ENSSSCG00000040575,ENSSSCG00000046640	STAT2,USP15,IRAK3,USP18,TNFAIP3,ADAR,LYAR,TRAFD1,PARP14,TRIM21,DHX58,CGAS,NMI,SAMHD1,NLRC5,ISG15,OAS1
112	multicellular organism development	GO:0007275	GO:BP	3392	832	218	ENSSSCG00000000206,ENSSSCG00000000475,ENSSSCG00000000625,ENSSSCG00000000753,ENSSSCG00000000950,ENSSSCG00000001382,ENSSSCG00000001453,ENSSSCG00000001567,ENSSSCG00000001595,ENSSSCG00000001710,ENSSSCG00000001727,ENSSSCG00000001909,ENSSSCG00000001912,ENSSSCG00000001952,ENSSSCG00000001971,ENSSSCG00000002474,ENSSSCG00000002516,ENSSSCG00000002639,ENSSSCG00000002836,ENSSSCG00000003419,ENSSSCG00000003439,…	FAIM2,IRAK3,LRP6,WNK1,E2F7,DDR1,HLA-DRA,CPNE5,DAAM2,RUNX2,TNFRSF21,STRA6,PML,NFKBIA,HECTD1,PPP4R4,WARS1,TUBB3,SALL1,MAD2L2,DHRS3,MFSD2A,IMPACT,CELF4,DOCK7,TACSTD2,TAB2,TNFAIP3,RSPO3,ADGRB3,SMAD7,ZNF609,MAPK6,THBS1,NIN,MLLT3,CD274,JAK2,RORB,TNC,SETX,AGO2,CCN3,ANGPT1,FZD6,VPS13B,GPR161,DDR2,UHMK1,NTRK1,CRABP2,ADAR,PHGDH,HIPK1,SLC6A17,PCM1,IDO1,SLC20A2,BFSP1,PLAGL2,ZNF335,PTGIS,MICALL2,ENSSSCG000000…
113	cell population proliferation	GO:0008283	GO:BP	2408	832	167	ENSSSCG00000000135,ENSSSCG00000000197,ENSSSCG00000000396,ENSSSCG00000000523,ENSSSCG00000000950,ENSSSCG00000001382,ENSSSCG00000001567,ENSSSCG00000001595,ENSSSCG00000001710,ENSSSCG00000001727,ENSSSCG00000001912,ENSSSCG00000001952,ENSSSCG00000002639,ENSSSCG00000003197,ENSSSCG00000003669,ENSSSCG00000003713,ENSSSCG00000003818,ENSSSCG00000003832,ENSSSCG00000004154,ENSSSCG00000004270,ENSSSCG00000004507,…	KCTD17,C1QL4,STAT2,BBS10,E2F7,DDR1,CPNE5,DAAM2,RUNX2,TNFRSF21,PML,NFKBIA,TUBB3,MED25,MFSD2A,IMPACT,DOCK7,TACSTD2,TNFAIP3,ADGRB3,SMAD7,ZNF609,MAPK6,TTBK2,THBS1,NIN,LGALS3,CD274,JAK2,NR4A3,TNC,SETX,CCN3,ANGPT1,FZD6,SDCBP,DDR2,UHMK1,SLAMF1,NTRK1,CRABP2,NES,PHGDH,HIPK1,VCAM1,CDC14A,PCM1,IDO1,ZNF335,MICALL2,CAPG,EIF2AK2,STRN,BTC,CXCL11,HHIP,ARHGAP24,MYCBP2,SLITRK5,TNFSF13B,KIF13B,HMGB2,P2RX7,ACTN2,RET…
114	regulation of RNA biosynthetic process	GO:2001141	GO:BP	2801	832	187	ENSSSCG00000000006,ENSSSCG00000000186,ENSSSCG00000000396,ENSSSCG00000000475,ENSSSCG00000000625,ENSSSCG00000000700,ENSSSCG00000000932,ENSSSCG00000000950,ENSSSCG00000001233,ENSSSCG00000001509,ENSSSCG00000001561,ENSSSCG00000001667,ENSSSCG00000001710,ENSSSCG00000001912,ENSSSCG00000001952,ENSSSCG00000001958,ENSSSCG00000002002,ENSSSCG00000002263,ENSSSCG00000002344,ENSSSCG00000002755,ENSSSCG00000002836,…	PPARA,RHEBL1,STAT2,IRAK3,LRP6,ACRBP,NTS,E2F7,TRIM26,DAXX,ETV7,ZNF318,RUNX2,PML,NFKBIA,BAZ1A,IRF9,SLCO3A1,RIOX1,NFAT5,SALL1,MED25,ZNF614,MAD2L2,RLF,IMPACT,ENSSSCG00000003989,HIVEP2,TNFAIP3,SMAD7,ZNF609,ZNF516,MLLT3,JAK2,RORB,TLE4,NR4A3,TRAF1,SETX,AGO2,ATAD2,FZD6,ZFHX4,SDCBP,DDR2,USF1,NTRK1,BCL9,ENSSSCG00000007023,PLAGL2,RBL1,PTGIS,NFATC2IP,CIITA,ENSSSCG00000008147,TET3,REL,EFEMP1,EIF2AK2,NCOA1,LYA…
115	interferon-mediated signaling pathway	GO:0140888	GO:BP	60	832	17	ENSSSCG00000000396,ENSSSCG00000000774,ENSSSCG00000006543,ENSSSCG00000007508,ENSSSCG00000011874,ENSSSCG00000012853,ENSSSCG00000014277,ENSSSCG00000015897,ENSSSCG00000016057,ENSSSCG00000027709,ENSSSCG00000027806,ENSSSCG00000034347,ENSSSCG00000035859,ENSSSCG00000038912,ENSSSCG00000039751,ENSSSCG00000040575,ENSSSCG00000046640	STAT2,USP18,ADAR,ZBP1,PARP14,IRF7,IRF1,IFIH1,STAT1,PARP9,SAMHD1,TRIM56,WNT5A,ENSSSCG00000038912,NLRC5,ISG15,OAS1
116	cellular response to molecule of bacterial origin	GO:0071219	GO:BP	142	832	26	ENSSSCG00000001952,ENSSSCG00000003805,ENSSSCG00000004154,ENSSSCG00000005215,ENSSSCG00000005423,ENSSSCG00000008647,ENSSSCG00000008953,ENSSSCG00000009469,ENSSSCG00000009704,ENSSSCG00000011690,ENSSSCG00000011951,ENSSSCG00000015037,ENSSSCG00000016140,ENSSSCG00000016450,ENSSSCG00000020970,ENSSSCG00000024096,ENSSSCG00000024759,ENSSSCG00000024771,ENSSSCG00000032408,ENSSSCG00000032474,ENSSSCG00000032561,…	NFKBIA,PDE4B,TNFAIP3,JAK2,ABCA1,CMPK2,CXCL8,ACOD1,HMGB2,PLSCR4,NFKBIZ,IL18,FZD5,NOS3,IL6,RIPK2,CX3CL1,TICAM1,CASP7,CXCL10,PDCD1LG2,CXCL9,IRF8,WNT5A,ZC3H12A,TRAF6
117	cellular response to biotic stimulus	GO:0071216	GO:BP	164	832	28	ENSSSCG00000001952,ENSSSCG00000003805,ENSSSCG00000004154,ENSSSCG00000005215,ENSSSCG00000005423,ENSSSCG00000008647,ENSSSCG00000008953,ENSSSCG00000009469,ENSSSCG00000009704,ENSSSCG00000011690,ENSSSCG00000011951,ENSSSCG00000012325,ENSSSCG00000015037,ENSSSCG00000016140,ENSSSCG00000016450,ENSSSCG00000020970,ENSSSCG00000024096,ENSSSCG00000024219,ENSSSCG00000024759,ENSSSCG00000024771,ENSSSCG00000032408,…	NFKBIA,PDE4B,TNFAIP3,JAK2,ABCA1,CMPK2,CXCL8,ACOD1,HMGB2,PLSCR4,NFKBIZ,SMC1A,IL18,FZD5,NOS3,IL6,RIPK2,TIGAR,CX3CL1,TICAM1,CASP7,CXCL10,PDCD1LG2,CXCL9,IRF8,WNT5A,ZC3H12A,TRAF6
118	regulation of DNA-templated transcription	GO:0006355	GO:BP	2790	832	186	ENSSSCG00000000006,ENSSSCG00000000186,ENSSSCG00000000396,ENSSSCG00000000475,ENSSSCG00000000625,ENSSSCG00000000700,ENSSSCG00000000932,ENSSSCG00000000950,ENSSSCG00000001233,ENSSSCG00000001509,ENSSSCG00000001561,ENSSSCG00000001667,ENSSSCG00000001710,ENSSSCG00000001912,ENSSSCG00000001952,ENSSSCG00000001958,ENSSSCG00000002002,ENSSSCG00000002263,ENSSSCG00000002344,ENSSSCG00000002755,ENSSSCG00000002836,…	PPARA,RHEBL1,STAT2,IRAK3,LRP6,ACRBP,NTS,E2F7,TRIM26,DAXX,ETV7,ZNF318,RUNX2,PML,NFKBIA,BAZ1A,IRF9,SLCO3A1,RIOX1,NFAT5,SALL1,MED25,ZNF614,MAD2L2,RLF,IMPACT,ENSSSCG00000003989,HIVEP2,TNFAIP3,SMAD7,ZNF609,ZNF516,MLLT3,JAK2,RORB,TLE4,NR4A3,TRAF1,SETX,AGO2,ATAD2,FZD6,ZFHX4,SDCBP,DDR2,USF1,NTRK1,BCL9,ENSSSCG00000007023,PLAGL2,RBL1,PTGIS,NFATC2IP,CIITA,ENSSSCG00000008147,TET3,REL,EFEMP1,EIF2AK2,NCOA1,LYA…
119	pattern recognition receptor signaling pathway	GO:0002221	GO:BP	165	832	28	ENSSSCG00000000457,ENSSSCG00000000475,ENSSSCG00000001952,ENSSSCG00000003591,ENSSSCG00000004154,ENSSSCG00000008496,ENSSSCG00000009042,ENSSSCG00000009129,ENSSSCG00000009720,ENSSSCG00000011951,ENSSSCG00000012853,ENSSSCG00000012893,ENSSSCG00000013114,ENSSSCG00000014101,ENSSSCG00000014277,ENSSSCG00000015897,ENSSSCG00000017416,ENSSSCG00000017614,ENSSSCG00000021383,ENSSSCG00000022011,ENSSSCG00000022413,…	USP15,IRAK3,NFKBIA,PUM1,TNFAIP3,EIF2AK2,OTUD4,TIFA,DDX60,NFKBIZ,IRF7,UNC93B1,SLC15A3,AP3B1,IRF1,IFIH1,DHX58,TRIM25,CGAS,NMI,TIRAP,RIPK2,TICAM1,ALPK1,C1QBP,RAB7B,FBXL2,OAS1
120	protein modification process	GO:0036211	GO:BP	2856	832	189	ENSSSCG00000000061,ENSSSCG00000000396,ENSSSCG00000000457,ENSSSCG00000000475,ENSSSCG00000000625,ENSSSCG00000000665,ENSSSCG00000000730,ENSSSCG00000000753,ENSSSCG00000000774,ENSSSCG00000001233,ENSSSCG00000001252,ENSSSCG00000001382,ENSSSCG00000001509,ENSSSCG00000001869,ENSSSCG00000001912,ENSSSCG00000001971,ENSSSCG00000002263,ENSSSCG00000002283,ENSSSCG00000002344,ENSSSCG00000002469,ENSSSCG00000002474,…	PMM1,STAT2,USP15,IRAK3,LRP6,RIMKLB,PRMT8,WNK1,USP18,TRIM26,UBD,DDR1,DAXX,PEAK1,PML,HECTD1,SLCO3A1,FUT8,RIOX1,OTUB2,PPP4R4,WARS1,GAN,MLKL,N4BP1,MAD2L2,IMPACT,DOCK7,MOB3C,TAB2,TNFAIP3,TPD52L1,SMAD7,MAPK6,TTBK2,THBS1,JAK2,ABCA1,TRAF1,ANGPT1,VCPIP1,DDR2,UHMK1,B4GALT3,NTRK1,ADAR,HIPK1,CDC14A,ENSSSCG00000007023,TTLL9,PHF20,DCUN1D3,MLST8,ADRA2B,TET3,SPRED2,USP34,EFEMP1,PIGF,EIF2AK2,ROCK2,ADRA2C,TEC,BTC,…
121	negative regulation of immune system process	GO:0002683	GO:BP	361	832	44	ENSSSCG00000000396,ENSSSCG00000000457,ENSSSCG00000000475,ENSSSCG00000000774,ENSSSCG00000001727,ENSSSCG00000004154,ENSSSCG00000004507,ENSSSCG00000004789,ENSSSCG00000005211,ENSSSCG00000006002,ENSSSCG00000006035,ENSSSCG00000006380,ENSSSCG00000006543,ENSSSCG00000007007,ENSSSCG00000008729,ENSSSCG00000009042,ENSSSCG00000009886,ENSSSCG00000011831,ENSSSCG00000011874,ENSSSCG00000014277,ENSSSCG00000014780,…	STAT2,USP15,IRAK3,USP18,TNFRSF21,TNFAIP3,SMAD7,THBS1,CD274,CCN3,ANGPT1,SLAMF1,ADAR,IDO1,LYAR,OTUD4,TRAFD1,APOD,PARP14,IRF1,TRIM21,DHX58,TBX21,ENSSSCG00000017754,CGAS,NMI,TNFAIP6,GBP1,IL17D,TNFRSF11B,SAMHD1,SOCS1,PLA2G2D,RASSF5,PDCD1LG2,GPR68,C1QBP,RAB7B,ZC3H12A,NLRC5,FBXL2,ISG15,GPR17,OAS1
122	nucleobase-containing compound biosynthetic process	GO:0034654	GO:BP	3256	832	209	ENSSSCG00000000006,ENSSSCG00000000061,ENSSSCG00000000186,ENSSSCG00000000396,ENSSSCG00000000457,ENSSSCG00000000475,ENSSSCG00000000625,ENSSSCG00000000700,ENSSSCG00000000932,ENSSSCG00000000950,ENSSSCG00000001233,ENSSSCG00000001509,ENSSSCG00000001561,ENSSSCG00000001667,ENSSSCG00000001710,ENSSSCG00000001912,ENSSSCG00000001952,ENSSSCG00000001958,ENSSSCG00000002002,ENSSSCG00000002263,ENSSSCG00000002344,…	PPARA,PMM1,RHEBL1,STAT2,USP15,IRAK3,LRP6,ACRBP,NTS,E2F7,TRIM26,DAXX,ETV7,ZNF318,RUNX2,PML,NFKBIA,BAZ1A,IRF9,SLCO3A1,RIOX1,NFAT5,SALL1,MED25,ZNF614,MAD2L2,NPPB,RLF,IMPACT,ENSSSCG00000003989,HIVEP2,TNFAIP3,SMAD7,ZNF609,ZNF516,MLLT3,JAK2,RORB,TLE4,NR4A3,TRAF1,SETX,AGO2,ATAD2,FZD6,ZFHX4,SDCBP,DDR2,USF1,NTRK1,BCL9,IDO1,ENSSSCG00000007023,PLAGL2,RBL1,PTGIS,NFATC2IP,CIITA,ENSSSCG00000008147,TET3,REL,EFE…
123	cellular response to lipopolysaccharide	GO:0071222	GO:BP	136	832	25	ENSSSCG00000001952,ENSSSCG00000003805,ENSSSCG00000004154,ENSSSCG00000005215,ENSSSCG00000005423,ENSSSCG00000008647,ENSSSCG00000008953,ENSSSCG00000009469,ENSSSCG00000009704,ENSSSCG00000011690,ENSSSCG00000011951,ENSSSCG00000015037,ENSSSCG00000016450,ENSSSCG00000020970,ENSSSCG00000024096,ENSSSCG00000024759,ENSSSCG00000024771,ENSSSCG00000032408,ENSSSCG00000032474,ENSSSCG00000032561,ENSSSCG00000032777,…	NFKBIA,PDE4B,TNFAIP3,JAK2,ABCA1,CMPK2,CXCL8,ACOD1,HMGB2,PLSCR4,NFKBIZ,IL18,NOS3,IL6,RIPK2,CX3CL1,TICAM1,CASP7,CXCL10,PDCD1LG2,CXCL9,IRF8,WNT5A,ZC3H12A,TRAF6
124	response to type I interferon	GO:0034340	GO:BP	55	832	16	ENSSSCG00000000396,ENSSSCG00000000774,ENSSSCG00000006543,ENSSSCG00000007508,ENSSSCG00000010452,ENSSSCG00000012077,ENSSSCG00000012853,ENSSSCG00000015897,ENSSSCG00000016057,ENSSSCG00000027806,ENSSSCG00000034347,ENSSSCG00000035859,ENSSSCG00000038912,ENSSSCG00000039751,ENSSSCG00000040575,ENSSSCG00000046640	STAT2,USP18,ADAR,ZBP1,IFIT1,MX1,IRF7,IFIH1,STAT1,SAMHD1,TRIM56,WNT5A,ENSSSCG00000038912,NLRC5,ISG15,OAS1
125	antiviral innate immune response	GO:0140374	GO:BP	41	832	14	ENSSSCG00000000774,ENSSSCG00000007508,ENSSSCG00000008496,ENSSSCG00000010451,ENSSSCG00000010452,ENSSSCG00000011465,ENSSSCG00000012055,ENSSSCG00000012077,ENSSSCG00000015897,ENSSSCG00000017416,ENSSSCG00000017614,ENSSSCG00000032474,ENSSSCG00000038082,ENSSSCG00000046640	USP18,ZBP1,EIF2AK2,IFIT2,IFIT1,PDE12,MORC3,MX1,IFIH1,DHX58,TRIM25,CXCL10,TRAF6,OAS1
126	MAPK cascade	GO:0000165	GO:BP	592	832	60	ENSSSCG00000000197,ENSSSCG00000000475,ENSSSCG00000001509,ENSSSCG00000001523,ENSSSCG00000003601,ENSSSCG00000004225,ENSSSCG00000004624,ENSSSCG00000004789,ENSSSCG00000005511,ENSSSCG00000005724,ENSSSCG00000006035,ENSSSCG00000006380,ENSSSCG00000006464,ENSSSCG00000008122,ENSSSCG00000008168,ENSSSCG00000008357,ENSSSCG00000008496,ENSSSCG00000008703,ENSSSCG00000009817,ENSSSCG00000010199,ENSSSCG00000010448,…	C1QL4,IRAK3,DAXX,GRM4,HCRTR1,TPD52L1,MAPK6,THBS1,TRAF1,SETX,ANGPT1,SLAMF1,NTRK1,ADRA2B,RNF149,SPRED2,EIF2AK2,ADRA2C,P2RX7,RET,FAS,ADRA2A,JCAD,NRP1,ICAM1,HMGCR,IL18,DUSP4,FZD5,EPHA4,NF1,IL6,TIRAP,PDGFRB,SCG2,PRKCD,RIPK2,MT3,CX3CL1,FGF1,GBP1,DVL2,HIPK2,EZH2,IGF1R,DUSP16,CCL4,DUSP8,GDF15,F2R,EDN1,ENSSSCG00000035736,WNT5A,GADD45A,ZC3H12A,TRAF6,MAPK13,BMP2,CYLD,CCL8
127	extrinsic apoptotic signaling pathway	GO:0097191	GO:BP	180	832	29	ENSSSCG00000000206,ENSSSCG00000000623,ENSSSCG00000001509,ENSSSCG00000001516,ENSSSCG00000001912,ENSSSCG00000004154,ENSSSCG00000004789,ENSSSCG00000005055,ENSSSCG00000005215,ENSSSCG00000005511,ENSSSCG00000006760,ENSSSCG00000009704,ENSSSCG00000009817,ENSSSCG00000010448,ENSSSCG00000011102,ENSSSCG00000011746,ENSSSCG00000011951,ENSSSCG00000013448,ENSSSCG00000013655,ENSSSCG00000016101,ENSSSCG00000023032,…	FAIM2,BCL2L14,DAXX,ENSSSCG00000001516,PML,TNFAIP3,THBS1,LGALS3,JAK2,TRAF1,HIPK1,HMGB2,P2RX7,FAS,NRP1,SKIL,NFKBIZ,MKNK2,ICAM1,CFLAR,SCG2,CASP10,STK4,EYA4,IFI6,INHBA,GCLM,CYLD,DEPTOR
128	innate immune response-activating signaling pathway	GO:0002758	GO:BP	171	832	28	ENSSSCG00000000457,ENSSSCG00000000475,ENSSSCG00000001952,ENSSSCG00000003591,ENSSSCG00000004154,ENSSSCG00000008496,ENSSSCG00000009042,ENSSSCG00000009129,ENSSSCG00000009720,ENSSSCG00000011951,ENSSSCG00000012853,ENSSSCG00000012893,ENSSSCG00000013114,ENSSSCG00000014101,ENSSSCG00000014277,ENSSSCG00000015897,ENSSSCG00000017416,ENSSSCG00000017614,ENSSSCG00000021383,ENSSSCG00000022011,ENSSSCG00000022413,…	USP15,IRAK3,NFKBIA,PUM1,TNFAIP3,EIF2AK2,OTUD4,TIFA,DDX60,NFKBIZ,IRF7,UNC93B1,SLC15A3,AP3B1,IRF1,IFIH1,DHX58,TRIM25,CGAS,NMI,TIRAP,RIPK2,TICAM1,ALPK1,C1QBP,RAB7B,FBXL2,OAS1
129	positive regulation of protein metabolic process	GO:0051247	GO:BP	1058	832	89	ENSSSCG00000001509,ENSSSCG00000001912,ENSSSCG00000001952,ENSSSCG00000002263,ENSSSCG00000003112,ENSSSCG00000003419,ENSSSCG00000003713,ENSSSCG00000003818,ENSSSCG00000003897,ENSSSCG00000004110,ENSSSCG00000004154,ENSSSCG00000004225,ENSSSCG00000004507,ENSSSCG00000004789,ENSSSCG00000005215,ENSSSCG00000005935,ENSSSCG00000006035,ENSSSCG00000006338,ENSSSCG00000006342,ENSSSCG00000006648,ENSSSCG00000007311,…	DAXX,PML,NFKBIA,SLCO3A1,BBC3,MAD2L2,IMPACT,DOCK7,MOB3C,TAB2,TNFAIP3,TPD52L1,SMAD7,THBS1,JAK2,AGO2,ANGPT1,DDR2,UHMK1,CTSS,PHF20,DCUN1D3,MLST8,ADRA2B,ROCK2,ADRA2C,BTC,MYCBP2,P2RX7,RET,FAS,NEURL1,ADRA2A,TOPORS,NRP1,MELTF,PARP14,ASB9,HUWE1,OGT,HCFC1,IL18,ANKIB1,TNFSF18,FZD5,EPHA4,NUB1,ITGA1,IL31RA,FAM20A,CCR7,CSF3,IL6,NMI,TIRAP,PDGFRB,SAMD4A,PRKCD,RIPK2,MT3,CX3CL1,TICAM1,FGF1,RNF19B,IL17D,DVL2,PMAIP1…
130	cell communication	GO:0007154	GO:BP	6341	832	356	ENSSSCG00000000006,ENSSSCG00000000186,ENSSSCG00000000197,ENSSSCG00000000206,ENSSSCG00000000217,ENSSSCG00000000396,ENSSSCG00000000457,ENSSSCG00000000475,ENSSSCG00000000623,ENSSSCG00000000625,ENSSSCG00000000753,ENSSSCG00000000774,ENSSSCG00000000932,ENSSSCG00000000950,ENSSSCG00000001252,ENSSSCG00000001382,ENSSSCG00000001509,ENSSSCG00000001516,ENSSSCG00000001523,ENSSSCG00000001595,ENSSSCG00000001710,…	PPARA,RHEBL1,C1QL4,FAIM2,RACGAP1,STAT2,USP15,IRAK3,BCL2L14,LRP6,WNK1,USP18,NTS,E2F7,UBD,DDR1,DAXX,ENSSSCG00000001516,GRM4,DAAM2,RUNX2,TNFRSF21,PAQR8,PML,HCN4,NFKBIA,FUT8,TUBB3,MLKL,NFAT5,SALL1,BBC3,PLEKHA4,MAD2L2,NPPB,DHRS3,PUM1,HCRTR1,MFSD2A,IMPACT,CELF4,PTGER3,PDE4B,DOCK7,MOB3C,TAB2,STX11,TNFAIP3,RSPO3,TPD52L1,ADGRB3,SMAD7,MAPK6,TTBK2,THBS1,LGALS3,MLLT3,SLC24A2,CD274,JAK2,ENTREP1,RORB,TLE4,NR4A…
131	negative regulation of response to biotic stimulus	GO:0002832	GO:BP	100	832	21	ENSSSCG00000000396,ENSSSCG00000000457,ENSSSCG00000000475,ENSSSCG00000000774,ENSSSCG00000004154,ENSSSCG00000006543,ENSSSCG00000008729,ENSSSCG00000009469,ENSSSCG00000009886,ENSSSCG00000011874,ENSSSCG00000014780,ENSSSCG00000017416,ENSSSCG00000021383,ENSSSCG00000022011,ENSSSCG00000027806,ENSSSCG00000035048,ENSSSCG00000036352,ENSSSCG00000039751,ENSSSCG00000039802,ENSSSCG00000040575,ENSSSCG00000046640	STAT2,USP15,IRAK3,USP18,TNFAIP3,ADAR,LYAR,ACOD1,TRAFD1,PARP14,TRIM21,DHX58,CGAS,NMI,SAMHD1,C1QBP,RAB7B,NLRC5,FBXL2,ISG15,OAS1
132	cellular developmental process	GO:0048869	GO:BP	3115	832	200	ENSSSCG00000000006,ENSSSCG00000000197,ENSSSCG00000000206,ENSSSCG00000000217,ENSSSCG00000000625,ENSSSCG00000000700,ENSSSCG00000000950,ENSSSCG00000001252,ENSSSCG00000001382,ENSSSCG00000001453,ENSSSCG00000001567,ENSSSCG00000001595,ENSSSCG00000001710,ENSSSCG00000001727,ENSSSCG00000001750,ENSSSCG00000001912,ENSSSCG00000001952,ENSSSCG00000001971,ENSSSCG00000002344,ENSSSCG00000002639,ENSSSCG00000002836,…	PPARA,C1QL4,FAIM2,RACGAP1,LRP6,ACRBP,E2F7,UBD,DDR1,HLA-DRA,CPNE5,DAAM2,RUNX2,TNFRSF21,PAQR8,PML,NFKBIA,HECTD1,RIOX1,TUBB3,SALL1,MAD2L2,PUM1,MFSD2A,IMPACT,DOCK7,TACSTD2,ASF1A,ADGRB3,SMAD7,ZNF609,MAPK6,CEP152,ZNF516,NIN,LGALS3,MLLT3,JAK2,RORB,TNC,SETX,CCN3,ANGPT1,VPS13B,SDCBP,DDR2,UHMK1,SLAMF1,NTRK1,CRABP2,ADAR,ACP6,BCL9,PHGDH,HIPK1,MFSD14A,PCM1,BFSP1,RBL1,ZNF335,MICALL2,ADRA2B,EFEMP1,EIF2AK2,NCOA1…
133	cell differentiation	GO:0030154	GO:BP	3115	832	200	ENSSSCG00000000006,ENSSSCG00000000197,ENSSSCG00000000206,ENSSSCG00000000217,ENSSSCG00000000625,ENSSSCG00000000700,ENSSSCG00000000950,ENSSSCG00000001252,ENSSSCG00000001382,ENSSSCG00000001453,ENSSSCG00000001567,ENSSSCG00000001595,ENSSSCG00000001710,ENSSSCG00000001727,ENSSSCG00000001750,ENSSSCG00000001912,ENSSSCG00000001952,ENSSSCG00000001971,ENSSSCG00000002344,ENSSSCG00000002639,ENSSSCG00000002836,…	PPARA,C1QL4,FAIM2,RACGAP1,LRP6,ACRBP,E2F7,UBD,DDR1,HLA-DRA,CPNE5,DAAM2,RUNX2,TNFRSF21,PAQR8,PML,NFKBIA,HECTD1,RIOX1,TUBB3,SALL1,MAD2L2,PUM1,MFSD2A,IMPACT,DOCK7,TACSTD2,ASF1A,ADGRB3,SMAD7,ZNF609,MAPK6,CEP152,ZNF516,NIN,LGALS3,MLLT3,JAK2,RORB,TNC,SETX,CCN3,ANGPT1,VPS13B,SDCBP,DDR2,UHMK1,SLAMF1,NTRK1,CRABP2,ADAR,ACP6,BCL9,PHGDH,HIPK1,MFSD14A,PCM1,BFSP1,RBL1,ZNF335,MICALL2,ADRA2B,EFEMP1,EIF2AK2,NCOA1…
134	heterocycle biosynthetic process	GO:0018130	GO:BP	3319	832	210	ENSSSCG00000000006,ENSSSCG00000000061,ENSSSCG00000000186,ENSSSCG00000000396,ENSSSCG00000000457,ENSSSCG00000000475,ENSSSCG00000000625,ENSSSCG00000000700,ENSSSCG00000000932,ENSSSCG00000000950,ENSSSCG00000001233,ENSSSCG00000001509,ENSSSCG00000001561,ENSSSCG00000001667,ENSSSCG00000001710,ENSSSCG00000001912,ENSSSCG00000001952,ENSSSCG00000001958,ENSSSCG00000002002,ENSSSCG00000002263,ENSSSCG00000002344,…	PPARA,PMM1,RHEBL1,STAT2,USP15,IRAK3,LRP6,ACRBP,NTS,E2F7,TRIM26,DAXX,ETV7,ZNF318,RUNX2,PML,NFKBIA,BAZ1A,IRF9,SLCO3A1,RIOX1,NFAT5,SALL1,MED25,ZNF614,MAD2L2,NPPB,RLF,IMPACT,MOCOS,ENSSSCG00000003989,HIVEP2,TNFAIP3,SMAD7,ZNF609,ZNF516,MLLT3,JAK2,RORB,TLE4,NR4A3,TRAF1,SETX,AGO2,ATAD2,FZD6,ZFHX4,SDCBP,DDR2,USF1,NTRK1,BCL9,IDO1,ENSSSCG00000007023,PLAGL2,RBL1,PTGIS,NFATC2IP,CIITA,ENSSSCG00000008147,TET3,R…
135	response to type II interferon	GO:0034341	GO:BP	103	832	21	ENSSSCG00000001252,ENSSSCG00000007901,ENSSSCG00000011465,ENSSSCG00000011874,ENSSSCG00000012996,ENSSSCG00000014277,ENSSSCG00000014780,ENSSSCG00000015673,ENSSSCG00000016057,ENSSSCG00000016438,ENSSSCG00000022719,ENSSSCG00000024973,ENSSSCG00000027709,ENSSSCG00000032343,ENSSSCG00000034980,ENSSSCG00000035736,ENSSSCG00000035859,ENSSSCG00000036352,ENSSSCG00000038912,ENSSSCG00000039751,ENSSSCG00000040648	UBD,CIITA,PDE12,PARP14,CDC42EP2,IRF1,TRIM21,KYNU,STAT1,NUB1,RAB20,GBP1,PARP9,CCL4,IRF8,ENSSSCG00000035736,WNT5A,RAB7B,ENSSSCG00000038912,NLRC5,CCL8
136	activation of innate immune response	GO:0002218	GO:BP	188	832	29	ENSSSCG00000000457,ENSSSCG00000000475,ENSSSCG00000001952,ENSSSCG00000003591,ENSSSCG00000004154,ENSSSCG00000008496,ENSSSCG00000009042,ENSSSCG00000009129,ENSSSCG00000009720,ENSSSCG00000011951,ENSSSCG00000012853,ENSSSCG00000012893,ENSSSCG00000013114,ENSSSCG00000014101,ENSSSCG00000014277,ENSSSCG00000015897,ENSSSCG00000017416,ENSSSCG00000017614,ENSSSCG00000021383,ENSSSCG00000022011,ENSSSCG00000022413,…	USP15,IRAK3,NFKBIA,PUM1,TNFAIP3,EIF2AK2,OTUD4,TIFA,DDX60,NFKBIZ,IRF7,UNC93B1,SLC15A3,AP3B1,IRF1,IFIH1,DHX58,TRIM25,CGAS,NMI,TIRAP,RIPK2,TICAM1,ZNFX1,ALPK1,C1QBP,RAB7B,FBXL2,OAS1
137	positive regulation of developmental process	GO:0051094	GO:BP	925	832	80	ENSSSCG00000001453,ENSSSCG00000001567,ENSSSCG00000001710,ENSSSCG00000003419,ENSSSCG00000003713,ENSSSCG00000003832,ENSSSCG00000004270,ENSSSCG00000004507,ENSSSCG00000004624,ENSSSCG00000004789,ENSSSCG00000005022,ENSSSCG00000005935,ENSSSCG00000006237,ENSSSCG00000006338,ENSSSCG00000006464,ENSSSCG00000006472,ENSSSCG00000007027,ENSSSCG00000007432,ENSSSCG00000007463,ENSSSCG00000008122,ENSSSCG00000008581,…	HLA-DRA,CPNE5,RUNX2,MAD2L2,IMPACT,TACSTD2,ADGRB3,SMAD7,MAPK6,THBS1,NIN,AGO2,SDCBP,DDR2,NTRK1,CRABP2,SLC20A2,ZNF335,PTGIS,ADRA2B,NCOA1,ADRA2C,CXCL8,SLITRK5,TNFSF13B,HMGB2,P2RX7,RET,NEURL1,BAMBI,NRP1,HMCES,CLSTN2,NFKBIZ,ATP11C,GAL,AP3B1,IL18,VASH2,FRZB,STAT1,NOS3,PTN,FST,CSF3,TBX21,CYB5D2,TRPV2,IL6,RIPK2,FGF1,HIPK2,OLFM2,SOCS1,EZH2,ZBTB16,LIMK1,XKR8,STK4,SMURF2,CXCL9,AQP1,GPR68,GDF15,C1QBP,INHBA,ZN…
138	regulation of transferase activity	GO:0051338	GO:BP	625	832	61	ENSSSCG00000000475,ENSSSCG00000000625,ENSSSCG00000001509,ENSSSCG00000002516,ENSSSCG00000003419,ENSSSCG00000004110,ENSSSCG00000004154,ENSSSCG00000004225,ENSSSCG00000004507,ENSSSCG00000004789,ENSSSCG00000005215,ENSSSCG00000006035,ENSSSCG00000006338,ENSSSCG00000006464,ENSSSCG00000006543,ENSSSCG00000007331,ENSSSCG00000007854,ENSSSCG00000008122,ENSSSCG00000008703,ENSSSCG00000008965,ENSSSCG00000009682,…	IRAK3,LRP6,DAXX,WARS1,MAD2L2,TAB2,TNFAIP3,TPD52L1,SMAD7,THBS1,JAK2,ANGPT1,DDR2,NTRK1,ADAR,RBL1,DCUN1D3,ADRA2B,ADRA2C,BTC,HMBOX1,P2RX7,RET,NEURL1,ADRA2A,TOPORS,PRKAR2A,RUBCN,HEG1,DTX3L,HMGCR,CHORDC1,IL18,FZD5,EPHA4,POT1,CDK12,TIRAP,PDGFRB,PRKCD,TIGAR,MT3,FGF1,DVL2,SOCS1,RFC2,EZH2,UVRAG,SESN2,LIMK1,IGF1R,DUSP16,EDN1,ECT2,WNT5A,GADD45A,TRAF6,BMP2,NLRC5,CBS,DEPTOR
139	phosphate-containing compound metabolic process	GO:0006796	GO:BP	2258	832	155	ENSSSCG00000000006,ENSSSCG00000000396,ENSSSCG00000000475,ENSSSCG00000000625,ENSSSCG00000000753,ENSSSCG00000001382,ENSSSCG00000001509,ENSSSCG00000001869,ENSSSCG00000002263,ENSSSCG00000002474,ENSSSCG00000002516,ENSSSCG00000002716,ENSSSCG00000003419,ENSSSCG00000003431,ENSSSCG00000003669,ENSSSCG00000003713,ENSSSCG00000003744,ENSSSCG00000003805,ENSSSCG00000003818,ENSSSCG00000003897,ENSSSCG00000004110,…	PPARA,STAT2,IRAK3,LRP6,WNK1,DDR1,DAXX,PEAK1,SLCO3A1,PPP4R4,WARS1,MLKL,MAD2L2,NPPB,MFSD2A,IMPACT,MOCOS,PDE4B,DOCK7,MOB3C,TAB2,TNFAIP3,TPD52L1,SMAD7,MAPK6,TTBK2,THBS1,JAK2,ANGPT1,SDCBP,DDR2,UHMK1,NTRK1,ADAR,ACP6,HIPK1,CDC14A,DPYD,IDO1,RBL1,MLST8,ABCA3,ADRA2B,SPRED2,EFEMP1,PIGF,EIF2AK2,ROCK2,CMPK2,ADRA2C,TEC,BTC,SGMS2,P2RX7,PPTC7,RET,PPA1,FAS,ENTPD7,NEURL1,ADRA2A,C9orf72,NRP1,PFKFB3,PRKAR2A,IP6K1,RU…
140	aromatic compound biosynthetic process	GO:0019438	GO:BP	3325	832	210	ENSSSCG00000000006,ENSSSCG00000000061,ENSSSCG00000000186,ENSSSCG00000000396,ENSSSCG00000000457,ENSSSCG00000000475,ENSSSCG00000000625,ENSSSCG00000000700,ENSSSCG00000000932,ENSSSCG00000000950,ENSSSCG00000001233,ENSSSCG00000001509,ENSSSCG00000001561,ENSSSCG00000001667,ENSSSCG00000001710,ENSSSCG00000001912,ENSSSCG00000001952,ENSSSCG00000001958,ENSSSCG00000002002,ENSSSCG00000002263,ENSSSCG00000002344,…	PPARA,PMM1,RHEBL1,STAT2,USP15,IRAK3,LRP6,ACRBP,NTS,E2F7,TRIM26,DAXX,ETV7,ZNF318,RUNX2,PML,NFKBIA,BAZ1A,IRF9,SLCO3A1,RIOX1,NFAT5,SALL1,MED25,ZNF614,MAD2L2,NPPB,RLF,IMPACT,ENSSSCG00000003989,HIVEP2,TNFAIP3,SMAD7,ZNF609,ZNF516,MLLT3,JAK2,RORB,TLE4,NR4A3,TRAF1,SETX,AGO2,ATAD2,FZD6,ZFHX4,SDCBP,DDR2,USF1,NTRK1,BCL9,IDO1,ENSSSCG00000007023,PLAGL2,RBL1,PTGIS,NFATC2IP,CIITA,ENSSSCG00000008147,TET3,REL,EFE…
141	positive regulation of catalytic activity	GO:0043085	GO:BP	797	832	72	ENSSSCG00000001509,ENSSSCG00000001912,ENSSSCG00000003112,ENSSSCG00000003818,ENSSSCG00000004110,ENSSSCG00000004225,ENSSSCG00000004789,ENSSSCG00000005215,ENSSSCG00000006035,ENSSSCG00000006338,ENSSSCG00000006464,ENSSSCG00000006648,ENSSSCG00000007527,ENSSSCG00000007854,ENSSSCG00000008122,ENSSSCG00000008629,ENSSSCG00000008703,ENSSSCG00000008768,ENSSSCG00000008965,ENSSSCG00000009229,ENSSSCG00000009682,…	DAXX,PML,BBC3,DOCK7,TAB2,TPD52L1,THBS1,JAK2,ANGPT1,DDR2,NTRK1,CTSS,ENSSSCG00000007527,DCUN1D3,ADRA2B,ROCK2,ADRA2C,ARAP2,BTC,ARHGAP24,HMBOX1,HMGB2,P2RX7,RET,FAS,NEURL1,ADRA2A,DENND1B,TOPORS,C9orf72,USP6NL,ARHGAP42,IL18,PKP4,FZD5,EPHA4,NOS3,POT1,CHN2,ITGA1,NF1,ABR,TIRAP,DCP1A,PDGFRB,ARHGEF10,PRKCD,RIPK2,TIGAR,MT3,FGF1,DVL2,PMAIP1,CASP10,TBC1D2B,SOCS1,RFC2,EZH2,SESN2,IGF1R,CCL4,F2R,EDN1,PLSCR1,ENSSS…
142	protein phosphorylation	GO:0006468	GO:BP	1263	832	100	ENSSSCG00000000396,ENSSSCG00000000475,ENSSSCG00000000625,ENSSSCG00000000753,ENSSSCG00000001382,ENSSSCG00000001509,ENSSSCG00000001869,ENSSSCG00000002263,ENSSSCG00000002516,ENSSSCG00000002716,ENSSSCG00000003419,ENSSSCG00000003713,ENSSSCG00000003818,ENSSSCG00000003897,ENSSSCG00000004110,ENSSSCG00000004154,ENSSSCG00000004225,ENSSSCG00000004507,ENSSSCG00000004624,ENSSSCG00000004718,ENSSSCG00000004789,…	STAT2,IRAK3,LRP6,WNK1,DDR1,DAXX,PEAK1,SLCO3A1,WARS1,MLKL,MAD2L2,IMPACT,DOCK7,MOB3C,TAB2,TNFAIP3,TPD52L1,SMAD7,MAPK6,TTBK2,THBS1,JAK2,ANGPT1,DDR2,UHMK1,NTRK1,ADAR,HIPK1,MLST8,ADRA2B,SPRED2,EFEMP1,EIF2AK2,ROCK2,ADRA2C,TEC,BTC,P2RX7,RET,FAS,NEURL1,ADRA2A,C9orf72,NRP1,PRKAR2A,HEG1,PARP14,MORC3,MARK2,MKNK2,HMGCR,CHORDC1,IL18,TNFSF18,RNASEL,FZD5,EPHA4,IL31RA,FAM20A,CSF3,CDK12,IL6,TIRAP,STK10,PDGFRB,TAR…
143	organic cyclic compound biosynthetic process	GO:1901362	GO:BP	3426	832	215	ENSSSCG00000000006,ENSSSCG00000000061,ENSSSCG00000000186,ENSSSCG00000000396,ENSSSCG00000000457,ENSSSCG00000000475,ENSSSCG00000000625,ENSSSCG00000000700,ENSSSCG00000000932,ENSSSCG00000000950,ENSSSCG00000001233,ENSSSCG00000001509,ENSSSCG00000001561,ENSSSCG00000001667,ENSSSCG00000001710,ENSSSCG00000001912,ENSSSCG00000001952,ENSSSCG00000001958,ENSSSCG00000002002,ENSSSCG00000002263,ENSSSCG00000002344,…	PPARA,PMM1,RHEBL1,STAT2,USP15,IRAK3,LRP6,ACRBP,NTS,E2F7,TRIM26,DAXX,ETV7,ZNF318,RUNX2,PML,NFKBIA,BAZ1A,IRF9,SLCO3A1,RIOX1,NFAT5,SALL1,MED25,ZNF614,MAD2L2,NPPB,RLF,IMPACT,MOCOS,ENSSSCG00000003989,HIVEP2,TNFAIP3,SMAD7,ZNF609,ZNF516,MLLT3,JAK2,RORB,TLE4,NR4A3,TRAF1,SETX,AGO2,ATAD2,FZD6,ZFHX4,SDCBP,DDR2,USF1,NTRK1,BCL9,IDO1,ENSSSCG00000007023,PLAGL2,RBL1,PTGIS,NFATC2IP,CIITA,ENSSSCG00000008147,TET3,R…
144	signaling	GO:0023052	GO:BP	6247	832	350	ENSSSCG00000000006,ENSSSCG00000000186,ENSSSCG00000000197,ENSSSCG00000000206,ENSSSCG00000000217,ENSSSCG00000000396,ENSSSCG00000000457,ENSSSCG00000000475,ENSSSCG00000000623,ENSSSCG00000000625,ENSSSCG00000000753,ENSSSCG00000000774,ENSSSCG00000000932,ENSSSCG00000000950,ENSSSCG00000001252,ENSSSCG00000001382,ENSSSCG00000001509,ENSSSCG00000001516,ENSSSCG00000001523,ENSSSCG00000001595,ENSSSCG00000001710,…	PPARA,RHEBL1,C1QL4,FAIM2,RACGAP1,STAT2,USP15,IRAK3,BCL2L14,LRP6,WNK1,USP18,NTS,E2F7,UBD,DDR1,DAXX,ENSSSCG00000001516,GRM4,DAAM2,RUNX2,TNFRSF21,PAQR8,PML,HCN4,NFKBIA,FUT8,TUBB3,MLKL,NFAT5,SALL1,BBC3,PLEKHA4,MAD2L2,NPPB,DHRS3,PUM1,HCRTR1,IMPACT,CELF4,PTGER3,PDE4B,DOCK7,MOB3C,TAB2,STX11,TNFAIP3,RSPO3,TPD52L1,ADGRB3,SMAD7,MAPK6,TTBK2,THBS1,LGALS3,MLLT3,SLC24A2,CD274,JAK2,ENTREP1,RORB,TLE4,NR4A3,ABCA1…
145	phosphorus metabolic process	GO:0006793	GO:BP	2281	832	156	ENSSSCG00000000006,ENSSSCG00000000396,ENSSSCG00000000475,ENSSSCG00000000625,ENSSSCG00000000753,ENSSSCG00000001382,ENSSSCG00000001509,ENSSSCG00000001869,ENSSSCG00000002263,ENSSSCG00000002283,ENSSSCG00000002474,ENSSSCG00000002516,ENSSSCG00000002716,ENSSSCG00000003419,ENSSSCG00000003431,ENSSSCG00000003669,ENSSSCG00000003713,ENSSSCG00000003744,ENSSSCG00000003805,ENSSSCG00000003818,ENSSSCG00000003897,…	PPARA,STAT2,IRAK3,LRP6,WNK1,DDR1,DAXX,PEAK1,SLCO3A1,FUT8,PPP4R4,WARS1,MLKL,MAD2L2,NPPB,MFSD2A,IMPACT,MOCOS,PDE4B,DOCK7,MOB3C,TAB2,TNFAIP3,TPD52L1,SMAD7,MAPK6,TTBK2,THBS1,JAK2,ANGPT1,SDCBP,DDR2,UHMK1,NTRK1,ADAR,ACP6,HIPK1,CDC14A,DPYD,IDO1,RBL1,MLST8,ABCA3,ADRA2B,SPRED2,EFEMP1,PIGF,EIF2AK2,ROCK2,CMPK2,ADRA2C,TEC,BTC,SGMS2,P2RX7,PPTC7,RET,PPA1,FAS,ENTPD7,NEURL1,ADRA2A,C9orf72,NRP1,PFKFB3,PRKAR2A,IP6…
146	RNA biosynthetic process	GO:0032774	GO:BP	2935	832	190	ENSSSCG00000000006,ENSSSCG00000000186,ENSSSCG00000000396,ENSSSCG00000000457,ENSSSCG00000000475,ENSSSCG00000000625,ENSSSCG00000000700,ENSSSCG00000000932,ENSSSCG00000000950,ENSSSCG00000001233,ENSSSCG00000001509,ENSSSCG00000001561,ENSSSCG00000001667,ENSSSCG00000001710,ENSSSCG00000001912,ENSSSCG00000001952,ENSSSCG00000001958,ENSSSCG00000002002,ENSSSCG00000002263,ENSSSCG00000002344,ENSSSCG00000002755,…	PPARA,RHEBL1,STAT2,USP15,IRAK3,LRP6,ACRBP,NTS,E2F7,TRIM26,DAXX,ETV7,ZNF318,RUNX2,PML,NFKBIA,BAZ1A,IRF9,SLCO3A1,RIOX1,NFAT5,SALL1,MED25,ZNF614,MAD2L2,RLF,IMPACT,ENSSSCG00000003989,HIVEP2,TNFAIP3,SMAD7,ZNF609,ZNF516,MLLT3,JAK2,RORB,TLE4,NR4A3,TRAF1,SETX,AGO2,ATAD2,FZD6,ZFHX4,SDCBP,DDR2,USF1,NTRK1,BCL9,ENSSSCG00000007023,PLAGL2,RBL1,PTGIS,NFATC2IP,CIITA,ENSSSCG00000008147,TET3,REL,EFEMP1,EIF2AK2,NCO…
147	regulation of MAPK cascade	GO:0043408	GO:BP	525	832	54	ENSSSCG00000000197,ENSSSCG00000000475,ENSSSCG00000001523,ENSSSCG00000003601,ENSSSCG00000004225,ENSSSCG00000004789,ENSSSCG00000005511,ENSSSCG00000006035,ENSSSCG00000006380,ENSSSCG00000006464,ENSSSCG00000008122,ENSSSCG00000008168,ENSSSCG00000008357,ENSSSCG00000008496,ENSSSCG00000008703,ENSSSCG00000009817,ENSSSCG00000010199,ENSSSCG00000010448,ENSSSCG00000010629,ENSSSCG00000011020,ENSSSCG00000011102,…	C1QL4,IRAK3,GRM4,HCRTR1,TPD52L1,THBS1,TRAF1,ANGPT1,SLAMF1,NTRK1,ADRA2B,RNF149,SPRED2,EIF2AK2,ADRA2C,P2RX7,RET,FAS,ADRA2A,JCAD,NRP1,ICAM1,HMGCR,DUSP4,FZD5,EPHA4,NF1,IL6,TIRAP,PDGFRB,PRKCD,RIPK2,MT3,CX3CL1,FGF1,GBP1,DVL2,HIPK2,EZH2,IGF1R,DUSP16,CCL4,DUSP8,GDF15,F2R,EDN1,ENSSSCG00000035736,WNT5A,GADD45A,ZC3H12A,TRAF6,BMP2,CYLD,CCL8
148	immune response-activating signaling pathway	GO:0002757	GO:BP	302	832	38	ENSSSCG00000000457,ENSSSCG00000000475,ENSSSCG00000000753,ENSSSCG00000001727,ENSSSCG00000001952,ENSSSCG00000003591,ENSSSCG00000003805,ENSSSCG00000004154,ENSSSCG00000008496,ENSSSCG00000008820,ENSSSCG00000009042,ENSSSCG00000009129,ENSSSCG00000009720,ENSSSCG00000010504,ENSSSCG00000010900,ENSSSCG00000011951,ENSSSCG00000012853,ENSSSCG00000012893,ENSSSCG00000013114,ENSSSCG00000014101,ENSSSCG00000014277,…	USP15,IRAK3,WNK1,TNFRSF21,NFKBIA,PUM1,PDE4B,TNFAIP3,EIF2AK2,TEC,OTUD4,TIFA,DDX60,BLNK,DENND1B,NFKBIZ,IRF7,UNC93B1,SLC15A3,AP3B1,IRF1,IFIH1,DHX58,CCR7,TRIM25,CGAS,NMI,TIRAP,RIPK2,TICAM1,GBP1,ALPK1,C1QBP,RAB7B,ZC3H12A,TRAF6,FBXL2,OAS1
149	negative regulation of metabolic process	GO:0009892	GO:BP	2540	832	169	ENSSSCG00000000006,ENSSSCG00000000078,ENSSSCG00000000475,ENSSSCG00000000625,ENSSSCG00000000932,ENSSSCG00000000950,ENSSSCG00000001509,ENSSSCG00000001561,ENSSSCG00000001667,ENSSSCG00000001710,ENSSSCG00000001727,ENSSSCG00000001912,ENSSSCG00000001958,ENSSSCG00000002344,ENSSSCG00000002469,ENSSSCG00000002474,ENSSSCG00000002516,ENSSSCG00000002836,ENSSSCG00000002841,ENSSSCG00000003015,ENSSSCG00000003197,…	PPARA,TNRC6B,IRAK3,LRP6,NTS,E2F7,DAXX,ETV7,ZNF318,RUNX2,TNFRSF21,PML,BAZ1A,RIOX1,OTUB2,PPP4R4,WARS1,SALL1,N4BP1,EXOSC5,MED25,ZNF614,MAD2L2,UBR4,PUM1,MFSD2A,IMPACT,CELF4,TNFAIP3,SMAD7,THBS1,CD274,TLE4,AGO2,ANGPT1,SDCBP,SLAMF1,ADAR,MOV10,IDO1,RBL1,PTGIS,DCUN1D3,CIITA,ENSSSCG00000008147,SPRED2,REL,EIF2AK2,NBAS,ROCK2,LYAR,CXCL8,MYCBP2,HMBOX1,HMGB2,STN1,ADRA2A,SAMD4B,ZNF281,ELF3,C9orf72,UPF2,SMARCC1,P…
150	negative regulation of multicellular organismal process	GO:0051241	GO:BP	774	832	70	ENSSSCG00000000006,ENSSSCG00000000475,ENSSSCG00000000753,ENSSSCG00000001595,ENSSSCG00000001727,ENSSSCG00000001912,ENSSSCG00000002841,ENSSSCG00000003419,ENSSSCG00000003788,ENSSSCG00000003805,ENSSSCG00000003832,ENSSSCG00000004154,ENSSSCG00000004270,ENSSSCG00000004507,ENSSSCG00000004789,ENSSSCG00000005211,ENSSSCG00000006035,ENSSSCG00000006380,ENSSSCG00000006994,ENSSSCG00000007007,ENSSSCG00000008388,…	PPARA,IRAK3,WNK1,DAAM2,TNFRSF21,PML,N4BP1,MAD2L2,PTGER3,PDE4B,TACSTD2,TNFAIP3,ADGRB3,SMAD7,THBS1,CD274,ANGPT1,SLAMF1,PCM1,IDO1,REL,EFEMP1,ROCK2,P2RX7,NRP1,IP6K1,APOD,MORC3,BCOR,TIMP1,HMGCR,IRF1,ARHGAP42,STAT1,EPHA4,NOS3,PTN,DHX58,CCR7,TBX21,ENSSSCG00000017754,NMI,PRKCD,TNFAIP6,MT3,SIGIRR,CX3CL1,GBP1,IL17D,VASN,TNFRSF11B,SOCS1,EZH2,VGLL4,STK4,PLA2G2D,RASSF5,CXCL10,PDCD1LG2,GPR68,GDF15,ATP2A2,C1QBP…
151	phosphorylation	GO:0016310	GO:BP	1486	832	112	ENSSSCG00000000396,ENSSSCG00000000475,ENSSSCG00000000625,ENSSSCG00000000753,ENSSSCG00000001382,ENSSSCG00000001509,ENSSSCG00000001869,ENSSSCG00000002263,ENSSSCG00000002516,ENSSSCG00000002716,ENSSSCG00000003419,ENSSSCG00000003713,ENSSSCG00000003818,ENSSSCG00000003897,ENSSSCG00000004110,ENSSSCG00000004154,ENSSSCG00000004225,ENSSSCG00000004507,ENSSSCG00000004624,ENSSSCG00000004718,ENSSSCG00000004789,…	STAT2,IRAK3,LRP6,WNK1,DDR1,DAXX,PEAK1,SLCO3A1,WARS1,MLKL,MAD2L2,IMPACT,DOCK7,MOB3C,TAB2,TNFAIP3,TPD52L1,SMAD7,MAPK6,TTBK2,THBS1,JAK2,ANGPT1,SDCBP,DDR2,UHMK1,NTRK1,ADAR,HIPK1,RBL1,MLST8,ADRA2B,SPRED2,EFEMP1,EIF2AK2,ROCK2,ADRA2C,TEC,BTC,P2RX7,RET,FAS,NEURL1,ADRA2A,C9orf72,NRP1,PFKFB3,PRKAR2A,IP6K1,RUBCN,HEG1,PARP14,MORC3,MARK2,MKNK2,PIP5K1C,HMGCR,CHORDC1,IL18,TNFSF18,RNASEL,FZD5,EPHA4,IL31RA,FAM20A…
152	positive regulation of phosphorus metabolic process	GO:0010562	GO:BP	620	832	60	ENSSSCG00000000006,ENSSSCG00000001509,ENSSSCG00000002263,ENSSSCG00000003419,ENSSSCG00000003818,ENSSSCG00000003897,ENSSSCG00000004110,ENSSSCG00000004225,ENSSSCG00000004789,ENSSSCG00000005215,ENSSSCG00000006035,ENSSSCG00000006237,ENSSSCG00000006338,ENSSSCG00000006464,ENSSSCG00000008044,ENSSSCG00000008122,ENSSSCG00000008629,ENSSSCG00000008703,ENSSSCG00000008965,ENSSSCG00000009817,ENSSSCG00000010199,…	PPARA,DAXX,SLCO3A1,MAD2L2,DOCK7,MOB3C,TAB2,TPD52L1,THBS1,JAK2,ANGPT1,SDCBP,DDR2,NTRK1,MLST8,ADRA2B,ROCK2,ADRA2C,BTC,P2RX7,RET,FAS,NEURL1,ADRA2A,NRP1,PARP14,IL18,TNFSF18,FZD5,ACSL3,EPHA4,NOS3,ITGA1,IL31RA,FAM20A,CSF3,IL6,TIRAP,PDGFRB,PRKCD,RIPK2,TIGAR,MT3,CX3CL1,FGF1,DVL2,HIPK2,PARP9,SOCS1,EZH2,SESN2,IGF1R,STK4,EDN1,ECT2,WNT5A,TRAF6,APLNR,BMP2,OPRD1
153	positive regulation of phosphate metabolic process	GO:0045937	GO:BP	620	832	60	ENSSSCG00000000006,ENSSSCG00000001509,ENSSSCG00000002263,ENSSSCG00000003419,ENSSSCG00000003818,ENSSSCG00000003897,ENSSSCG00000004110,ENSSSCG00000004225,ENSSSCG00000004789,ENSSSCG00000005215,ENSSSCG00000006035,ENSSSCG00000006237,ENSSSCG00000006338,ENSSSCG00000006464,ENSSSCG00000008044,ENSSSCG00000008122,ENSSSCG00000008629,ENSSSCG00000008703,ENSSSCG00000008965,ENSSSCG00000009817,ENSSSCG00000010199,…	PPARA,DAXX,SLCO3A1,MAD2L2,DOCK7,MOB3C,TAB2,TPD52L1,THBS1,JAK2,ANGPT1,SDCBP,DDR2,NTRK1,MLST8,ADRA2B,ROCK2,ADRA2C,BTC,P2RX7,RET,FAS,NEURL1,ADRA2A,NRP1,PARP14,IL18,TNFSF18,FZD5,ACSL3,EPHA4,NOS3,ITGA1,IL31RA,FAM20A,CSF3,IL6,TIRAP,PDGFRB,PRKCD,RIPK2,TIGAR,MT3,CX3CL1,FGF1,DVL2,HIPK2,PARP9,SOCS1,EZH2,SESN2,IGF1R,STK4,EDN1,ECT2,WNT5A,TRAF6,APLNR,BMP2,OPRD1
154	anatomical structure morphogenesis	GO:0009653	GO:BP	2055	832	143	ENSSSCG00000000006,ENSSSCG00000000206,ENSSSCG00000000396,ENSSSCG00000000625,ENSSSCG00000000700,ENSSSCG00000000753,ENSSSCG00000000950,ENSSSCG00000001382,ENSSSCG00000001567,ENSSSCG00000001710,ENSSSCG00000001909,ENSSSCG00000001912,ENSSSCG00000001971,ENSSSCG00000002516,ENSSSCG00000002639,ENSSSCG00000002836,ENSSSCG00000003137,ENSSSCG00000003439,ENSSSCG00000003669,ENSSSCG00000003713,ENSSSCG00000003818,…	PPARA,FAIM2,STAT2,LRP6,ACRBP,WNK1,E2F7,DDR1,CPNE5,RUNX2,STRA6,PML,HECTD1,WARS1,TUBB3,SALL1,PLEKHA4,DHRS3,MFSD2A,IMPACT,DOCK7,TACSTD2,TNFAIP3,RSPO3,ADGRB3,SMAD7,THBS1,NIN,MLLT3,RORB,TNC,AGO2,CCN3,ANGPT1,FZD6,VPS13B,NTRK1,CRABP2,HIPK1,MFSD14A,ZNF335,PTGIS,EFEMP1,NCOA1,ROCK2,LRATD1,FRYL,CXCL8,HHIP,ARHGAP24,FREM2,MYCBP2,SLITRK5,TNFSF13B,KIF13B,P2RX7,ACTN2,RET,NFKB2,SH3PXD2A,ZNF281,ELF3,C9orf72,BAMBI,…
155	negative regulation of macromolecule metabolic process	GO:0010605	GO:BP	2377	832	160	ENSSSCG00000000006,ENSSSCG00000000078,ENSSSCG00000000475,ENSSSCG00000000625,ENSSSCG00000000932,ENSSSCG00000000950,ENSSSCG00000001509,ENSSSCG00000001561,ENSSSCG00000001667,ENSSSCG00000001710,ENSSSCG00000001727,ENSSSCG00000001912,ENSSSCG00000001958,ENSSSCG00000002344,ENSSSCG00000002469,ENSSSCG00000002474,ENSSSCG00000002516,ENSSSCG00000002836,ENSSSCG00000002841,ENSSSCG00000003015,ENSSSCG00000003197,…	PPARA,TNRC6B,IRAK3,LRP6,NTS,E2F7,DAXX,ETV7,ZNF318,RUNX2,TNFRSF21,PML,BAZ1A,RIOX1,OTUB2,PPP4R4,WARS1,SALL1,N4BP1,EXOSC5,MED25,ZNF614,MAD2L2,PUM1,IMPACT,CELF4,TNFAIP3,SMAD7,THBS1,CD274,TLE4,AGO2,ANGPT1,SDCBP,SLAMF1,ADAR,MOV10,IDO1,RBL1,DCUN1D3,CIITA,ENSSSCG00000008147,SPRED2,REL,EIF2AK2,NBAS,ROCK2,LYAR,CXCL8,MYCBP2,HMBOX1,HMGB2,STN1,SAMD4B,ZNF281,ELF3,C9orf72,UPF2,SMARCC1,PRKAR2A,PDE12,XRN1,SKIL,AP…
156	positive regulation of phosphorylation	GO:0042327	GO:BP	566	832	56	ENSSSCG00000001509,ENSSSCG00000002263,ENSSSCG00000003419,ENSSSCG00000003818,ENSSSCG00000003897,ENSSSCG00000004110,ENSSSCG00000004225,ENSSSCG00000004789,ENSSSCG00000005215,ENSSSCG00000006035,ENSSSCG00000006237,ENSSSCG00000006338,ENSSSCG00000006464,ENSSSCG00000008044,ENSSSCG00000008122,ENSSSCG00000008629,ENSSSCG00000008703,ENSSSCG00000008965,ENSSSCG00000009817,ENSSSCG00000010199,ENSSSCG00000010448,…	DAXX,SLCO3A1,MAD2L2,DOCK7,MOB3C,TAB2,TPD52L1,THBS1,JAK2,ANGPT1,SDCBP,DDR2,NTRK1,MLST8,ADRA2B,ROCK2,ADRA2C,BTC,P2RX7,RET,FAS,NEURL1,ADRA2A,NRP1,PARP14,IL18,TNFSF18,FZD5,EPHA4,IL31RA,FAM20A,CSF3,IL6,TIRAP,PDGFRB,PRKCD,RIPK2,TIGAR,MT3,CX3CL1,FGF1,DVL2,HIPK2,PARP9,SOCS1,EZH2,SESN2,IGF1R,STK4,EDN1,ECT2,WNT5A,TRAF6,APLNR,BMP2,OPRD1
157	DNA-templated transcription	GO:0006351	GO:BP	2912	832	187	ENSSSCG00000000006,ENSSSCG00000000186,ENSSSCG00000000396,ENSSSCG00000000457,ENSSSCG00000000475,ENSSSCG00000000625,ENSSSCG00000000700,ENSSSCG00000000932,ENSSSCG00000000950,ENSSSCG00000001233,ENSSSCG00000001509,ENSSSCG00000001561,ENSSSCG00000001667,ENSSSCG00000001710,ENSSSCG00000001912,ENSSSCG00000001952,ENSSSCG00000001958,ENSSSCG00000002002,ENSSSCG00000002263,ENSSSCG00000002344,ENSSSCG00000002755,…	PPARA,RHEBL1,STAT2,USP15,IRAK3,LRP6,ACRBP,NTS,E2F7,TRIM26,DAXX,ETV7,ZNF318,RUNX2,PML,NFKBIA,BAZ1A,IRF9,SLCO3A1,RIOX1,NFAT5,SALL1,MED25,ZNF614,MAD2L2,RLF,IMPACT,ENSSSCG00000003989,HIVEP2,TNFAIP3,SMAD7,ZNF609,ZNF516,MLLT3,JAK2,RORB,TLE4,NR4A3,TRAF1,SETX,AGO2,ATAD2,FZD6,ZFHX4,SDCBP,DDR2,USF1,NTRK1,BCL9,ENSSSCG00000007023,PLAGL2,RBL1,PTGIS,NFATC2IP,CIITA,ENSSSCG00000008147,TET3,REL,EFEMP1,EIF2AK2,NCO…
158	macromolecule modification	GO:0043412	GO:BP	3031	832	193	ENSSSCG00000000061,ENSSSCG00000000396,ENSSSCG00000000457,ENSSSCG00000000475,ENSSSCG00000000625,ENSSSCG00000000665,ENSSSCG00000000730,ENSSSCG00000000753,ENSSSCG00000000774,ENSSSCG00000001233,ENSSSCG00000001252,ENSSSCG00000001382,ENSSSCG00000001509,ENSSSCG00000001869,ENSSSCG00000001912,ENSSSCG00000001971,ENSSSCG00000002263,ENSSSCG00000002283,ENSSSCG00000002344,ENSSSCG00000002469,ENSSSCG00000002474,…	PMM1,STAT2,USP15,IRAK3,LRP6,RIMKLB,PRMT8,WNK1,USP18,TRIM26,UBD,DDR1,DAXX,PEAK1,PML,HECTD1,SLCO3A1,FUT8,RIOX1,OTUB2,PPP4R4,WARS1,GAN,MLKL,N4BP1,EXOSC5,MAD2L2,RLF,IMPACT,DOCK7,MOB3C,TAB2,TNFAIP3,TPD52L1,SMAD7,MAPK6,DTWD1,TTBK2,THBS1,JAK2,ABCA1,TRAF1,ANGPT1,VCPIP1,DDR2,UHMK1,B4GALT3,NTRK1,ADAR,HIPK1,CDC14A,ENSSSCG00000007023,TTLL9,PHF20,DCUN1D3,MLST8,ADRA2B,TET3,SPRED2,USP34,EFEMP1,PIGF,EIF2AK2,ROCK…
159	type I interferon-mediated signaling pathway	GO:0060337	GO:BP	48	832	14	ENSSSCG00000000396,ENSSSCG00000000774,ENSSSCG00000006543,ENSSSCG00000007508,ENSSSCG00000012853,ENSSSCG00000015897,ENSSSCG00000016057,ENSSSCG00000027806,ENSSSCG00000034347,ENSSSCG00000035859,ENSSSCG00000038912,ENSSSCG00000039751,ENSSSCG00000040575,ENSSSCG00000046640	STAT2,USP18,ADAR,ZBP1,IRF7,IFIH1,STAT1,SAMHD1,TRIM56,WNT5A,ENSSSCG00000038912,NLRC5,ISG15,OAS1
160	positive regulation of DNA-binding transcription factor activity	GO:0051091	GO:BP	211	832	30	ENSSSCG00000000186,ENSSSCG00000000475,ENSSSCG00000000625,ENSSSCG00000000932,ENSSSCG00000001233,ENSSSCG00000002263,ENSSSCG00000005511,ENSSSCG00000006338,ENSSSCG00000006464,ENSSSCG00000008496,ENSSSCG00000014670,ENSSSCG00000014768,ENSSSCG00000014780,ENSSSCG00000015037,ENSSSCG00000017488,ENSSSCG00000017614,ENSSSCG00000020970,ENSSSCG00000022413,ENSSSCG00000024096,ENSSSCG00000024759,ENSSSCG00000024771,…	RHEBL1,IRAK3,LRP6,NTS,TRIM26,SLCO3A1,TRAF1,DDR2,NTRK1,EIF2AK2,ENSSSCG00000014670,TRIM68,TRIM21,IL18,CSF3,TRIM25,IL6,TIRAP,RIPK2,CX3CL1,TICAM1,DVL2,HIPK2,TRIM14,TRIM38,EDN1,WNT5A,RAB7B,TRAF6,BMP2
161	immune response-regulating signaling pathway	GO:0002764	GO:BP	313	832	38	ENSSSCG00000000457,ENSSSCG00000000475,ENSSSCG00000000753,ENSSSCG00000001727,ENSSSCG00000001952,ENSSSCG00000003591,ENSSSCG00000003805,ENSSSCG00000004154,ENSSSCG00000008496,ENSSSCG00000008820,ENSSSCG00000009042,ENSSSCG00000009129,ENSSSCG00000009720,ENSSSCG00000010504,ENSSSCG00000010900,ENSSSCG00000011951,ENSSSCG00000012853,ENSSSCG00000012893,ENSSSCG00000013114,ENSSSCG00000014101,ENSSSCG00000014277,…	USP15,IRAK3,WNK1,TNFRSF21,NFKBIA,PUM1,PDE4B,TNFAIP3,EIF2AK2,TEC,OTUD4,TIFA,DDX60,BLNK,DENND1B,NFKBIZ,IRF7,UNC93B1,SLC15A3,AP3B1,IRF1,IFIH1,DHX58,CCR7,TRIM25,CGAS,NMI,TIRAP,RIPK2,TICAM1,GBP1,ALPK1,C1QBP,RAB7B,ZC3H12A,TRAF6,FBXL2,OAS1
162	signal transduction	GO:0007165	GO:BP	5900	832	331	ENSSSCG00000000006,ENSSSCG00000000186,ENSSSCG00000000197,ENSSSCG00000000206,ENSSSCG00000000217,ENSSSCG00000000396,ENSSSCG00000000457,ENSSSCG00000000475,ENSSSCG00000000623,ENSSSCG00000000625,ENSSSCG00000000753,ENSSSCG00000000774,ENSSSCG00000000932,ENSSSCG00000000950,ENSSSCG00000001252,ENSSSCG00000001382,ENSSSCG00000001509,ENSSSCG00000001516,ENSSSCG00000001523,ENSSSCG00000001595,ENSSSCG00000001710,…	PPARA,RHEBL1,C1QL4,FAIM2,RACGAP1,STAT2,USP15,IRAK3,BCL2L14,LRP6,WNK1,USP18,NTS,E2F7,UBD,DDR1,DAXX,ENSSSCG00000001516,GRM4,DAAM2,RUNX2,TNFRSF21,PAQR8,PML,NFKBIA,FUT8,TUBB3,MLKL,NFAT5,SALL1,BBC3,PLEKHA4,MAD2L2,NPPB,DHRS3,PUM1,HCRTR1,IMPACT,CELF4,PTGER3,PDE4B,DOCK7,MOB3C,TAB2,TNFAIP3,RSPO3,TPD52L1,ADGRB3,SMAD7,MAPK6,TTBK2,THBS1,LGALS3,MLLT3,CD274,JAK2,ENTREP1,RORB,TLE4,NR4A3,ABCA1,TRAF1,SETX,CCN3,AN…
163	programmed cell death	GO:0012501	GO:BP	1349	832	103	ENSSSCG00000000006,ENSSSCG00000000206,ENSSSCG00000000457,ENSSSCG00000000623,ENSSSCG00000000625,ENSSSCG00000001252,ENSSSCG00000001509,ENSSSCG00000001516,ENSSSCG00000001727,ENSSSCG00000001912,ENSSSCG00000002716,ENSSSCG00000003112,ENSSSCG00000004154,ENSSSCG00000004225,ENSSSCG00000004789,ENSSSCG00000005055,ENSSSCG00000005211,ENSSSCG00000005215,ENSSSCG00000005511,ENSSSCG00000005724,ENSSSCG00000006035,…	PPARA,FAIM2,USP15,BCL2L14,LRP6,UBD,DAXX,ENSSSCG00000001516,TNFRSF21,PML,MLKL,BBC3,TNFAIP3,TPD52L1,THBS1,LGALS3,CD274,JAK2,TRAF1,SETX,ANGPT1,NTRK1,ADAR,CTSS,HIPK1,IDO1,PLAGL2,PTGIS,ZBP1,DCUN1D3,EIF2AK2,NCOA1,BTC,HMGB2,P2RX7,AIFM2,FAS,IFIT2,NEURL1,XPNPEP1,TOPORS,NRP1,SKIL,NFKBIZ,OGT,MKNK2,ICAM1,IRF1,TRIM21,ENSSSCG00000014997,ASNS,FRZB,CFLAR,FZD5,IL6,SCG2,TARDBP,PRKCD,RIPK2,TIGAR,MT3,CX3CL1,TICAM1,G…
164	cell death	GO:0008219	GO:BP	1350	832	103	ENSSSCG00000000006,ENSSSCG00000000206,ENSSSCG00000000457,ENSSSCG00000000623,ENSSSCG00000000625,ENSSSCG00000001252,ENSSSCG00000001509,ENSSSCG00000001516,ENSSSCG00000001727,ENSSSCG00000001912,ENSSSCG00000002716,ENSSSCG00000003112,ENSSSCG00000004154,ENSSSCG00000004225,ENSSSCG00000004789,ENSSSCG00000005055,ENSSSCG00000005211,ENSSSCG00000005215,ENSSSCG00000005511,ENSSSCG00000005724,ENSSSCG00000006035,…	PPARA,FAIM2,USP15,BCL2L14,LRP6,UBD,DAXX,ENSSSCG00000001516,TNFRSF21,PML,MLKL,BBC3,TNFAIP3,TPD52L1,THBS1,LGALS3,CD274,JAK2,TRAF1,SETX,ANGPT1,NTRK1,ADAR,CTSS,HIPK1,IDO1,PLAGL2,PTGIS,ZBP1,DCUN1D3,EIF2AK2,NCOA1,BTC,HMGB2,P2RX7,AIFM2,FAS,IFIT2,NEURL1,XPNPEP1,TOPORS,NRP1,SKIL,NFKBIZ,OGT,MKNK2,ICAM1,IRF1,TRIM21,ENSSSCG00000014997,ASNS,FRZB,CFLAR,FZD5,IL6,SCG2,TARDBP,PRKCD,RIPK2,TIGAR,MT3,CX3CL1,TICAM1,G…
165	negative regulation of nitrogen compound metabolic process	GO:0051172	GO:BP	1801	832	128	ENSSSCG00000000006,ENSSSCG00000000078,ENSSSCG00000000475,ENSSSCG00000000625,ENSSSCG00000000950,ENSSSCG00000001509,ENSSSCG00000001561,ENSSSCG00000001667,ENSSSCG00000001710,ENSSSCG00000001912,ENSSSCG00000002344,ENSSSCG00000002469,ENSSSCG00000002474,ENSSSCG00000002516,ENSSSCG00000002836,ENSSSCG00000002841,ENSSSCG00000003015,ENSSSCG00000003197,ENSSSCG00000003241,ENSSSCG00000003419,ENSSSCG00000003591,…	PPARA,TNRC6B,IRAK3,LRP6,E2F7,DAXX,ETV7,ZNF318,RUNX2,PML,RIOX1,OTUB2,PPP4R4,WARS1,SALL1,N4BP1,EXOSC5,MED25,ZNF614,MAD2L2,PUM1,IMPACT,CELF4,TNFAIP3,SMAD7,THBS1,TLE4,AGO2,ANGPT1,SDCBP,ADAR,MOV10,RBL1,PTGIS,DCUN1D3,CIITA,ENSSSCG00000008147,SPRED2,EIF2AK2,NBAS,ROCK2,LYAR,MYCBP2,HMBOX1,HMGB2,STN1,SAMD4B,ZNF281,ELF3,C9orf72,SMARCC1,PRKAR2A,PDE12,SKIL,APOD,HEG1,PARP14,DTX3L,MORC3,BCOR,ENSSSCG00000012264,…
166	canonical NF-kappaB signal transduction	GO:0007249	GO:BP	202	832	29	ENSSSCG00000001252,ENSSSCG00000001952,ENSSSCG00000004110,ENSSSCG00000004154,ENSSSCG00000005511,ENSSSCG00000006035,ENSSSCG00000008388,ENSSSCG00000008629,ENSSSCG00000009129,ENSSSCG00000010454,ENSSSCG00000014670,ENSSSCG00000014768,ENSSSCG00000014780,ENSSSCG00000016057,ENSSSCG00000016101,ENSSSCG00000017614,ENSSSCG00000022413,ENSSSCG00000024096,ENSSSCG00000024759,ENSSSCG00000024771,ENSSSCG00000026940,…	UBD,NFKBIA,TAB2,TNFAIP3,TRAF1,ANGPT1,REL,ROCK2,TIFA,IFIT5,ENSSSCG00000014670,TRIM68,TRIM21,STAT1,CFLAR,TRIM25,TIRAP,RIPK2,CX3CL1,TICAM1,CASP10,PIM2,ALPK1,TRIM38,F2R,EDN1,WNT5A,ZC3H12A,TRAF6
167	negative regulation of cellular metabolic process	GO:0031324	GO:BP	2298	832	154	ENSSSCG00000000006,ENSSSCG00000000078,ENSSSCG00000000475,ENSSSCG00000000625,ENSSSCG00000000932,ENSSSCG00000000950,ENSSSCG00000001509,ENSSSCG00000001561,ENSSSCG00000001667,ENSSSCG00000001710,ENSSSCG00000001727,ENSSSCG00000001912,ENSSSCG00000001958,ENSSSCG00000002344,ENSSSCG00000002469,ENSSSCG00000002474,ENSSSCG00000002516,ENSSSCG00000002836,ENSSSCG00000002841,ENSSSCG00000003015,ENSSSCG00000003197,…	PPARA,TNRC6B,IRAK3,LRP6,NTS,E2F7,DAXX,ETV7,ZNF318,RUNX2,TNFRSF21,PML,BAZ1A,RIOX1,OTUB2,PPP4R4,WARS1,SALL1,N4BP1,EXOSC5,MED25,ZNF614,MAD2L2,UBR4,PUM1,MFSD2A,IMPACT,CELF4,TNFAIP3,SMAD7,THBS1,CD274,TLE4,AGO2,ANGPT1,SDCBP,SLAMF1,ADAR,MOV10,IDO1,RBL1,PTGIS,CIITA,ENSSSCG00000008147,SPRED2,REL,EIF2AK2,NBAS,ROCK2,LYAR,CXCL8,HMBOX1,HMGB2,STN1,SAMD4B,ZNF281,ELF3,C9orf72,UPF2,PRKAR2A,PDE12,XRN1,SKIL,APOD,RU…
168	positive regulation of DNA-templated transcription	GO:0045893	GO:BP	1362	832	103	ENSSSCG00000000006,ENSSSCG00000000396,ENSSSCG00000000625,ENSSSCG00000000700,ENSSSCG00000000950,ENSSSCG00000001509,ENSSSCG00000001667,ENSSSCG00000001710,ENSSSCG00000001952,ENSSSCG00000002002,ENSSSCG00000002755,ENSSSCG00000002836,ENSSSCG00000003197,ENSSSCG00000003419,ENSSSCG00000003989,ENSSSCG00000004551,ENSSSCG00000004859,ENSSSCG00000005166,ENSSSCG00000005215,ENSSSCG00000005268,ENSSSCG00000005385,…	PPARA,STAT2,LRP6,ACRBP,E2F7,DAXX,ZNF318,RUNX2,NFKBIA,IRF9,NFAT5,SALL1,MED25,MAD2L2,ENSSSCG00000003989,ZNF609,ZNF516,MLLT3,JAK2,RORB,NR4A3,SETX,AGO2,ATAD2,USF1,BCL9,PLAGL2,NFATC2IP,CIITA,TET3,REL,NCOA1,LYAR,JADE1,SPP1,ENSSSCG00000009240,HMBOX1,HMGB2,RET,NFKB2,ZNF281,ELF3,TOPORS,BAMBI,SMARCC1,DTX3L,NFKBIZ,OGT,HCFC1,IRF7,GAL,EHF,AP3B1,IRF1,TRIM21,NUP98,IL18,NAMPT,RNASEL,IRF2,NSD3,HOXD10,STAT1,INO80D…
169	activation of immune response	GO:0002253	GO:BP	361	832	41	ENSSSCG00000000457,ENSSSCG00000000475,ENSSSCG00000000753,ENSSSCG00000001727,ENSSSCG00000001952,ENSSSCG00000003591,ENSSSCG00000003805,ENSSSCG00000004154,ENSSSCG00000008496,ENSSSCG00000008820,ENSSSCG00000009042,ENSSSCG00000009129,ENSSSCG00000009720,ENSSSCG00000010504,ENSSSCG00000010900,ENSSSCG00000011951,ENSSSCG00000012853,ENSSSCG00000012893,ENSSSCG00000013114,ENSSSCG00000013418,ENSSSCG00000014101,…	USP15,IRAK3,WNK1,TNFRSF21,NFKBIA,PUM1,PDE4B,TNFAIP3,EIF2AK2,TEC,OTUD4,TIFA,DDX60,BLNK,DENND1B,NFKBIZ,IRF7,UNC93B1,SLC15A3,CFD,AP3B1,IRF1,IFIH1,DHX58,CCR7,TRIM25,CGAS,NMI,TIRAP,FCN2,RIPK2,TICAM1,GBP1,ZNFX1,ALPK1,C1QBP,RAB7B,ZC3H12A,TRAF6,FBXL2,OAS1
170	adaptive immune response based on somatic recombination of immune receptors built from immunoglobulin superfamily domains	GO:0002460	GO:BP	229	832	31	ENSSSCG00000001341,ENSSSCG00000001394,ENSSSCG00000001453,ENSSSCG00000003419,ENSSSCG00000004154,ENSSSCG00000004507,ENSSSCG00000005211,ENSSSCG00000006380,ENSSSCG00000009542,ENSSSCG00000009817,ENSSSCG00000009938,ENSSSCG00000010540,ENSSSCG00000010580,ENSSSCG00000010900,ENSSSCG00000011611,ENSSSCG00000011951,ENSSSCG00000012853,ENSSSCG00000012893,ENSSSCG00000013655,ENSSSCG00000015037,ENSSSCG00000016140,…	ENSSSCG00000001341,ENSSSCG00000001394,HLA-DRA,MAD2L2,TNFAIP3,SMAD7,CD274,SLAMF1,TNFSF13B,P2RX7,UNG,ENTPD7,NFKB2,DENND1B,HMCES,NFKBIZ,IRF7,UNC93B1,ICAM1,IL18,FZD5,TBX21,SUPT6H,IL6,PRKCD,RIPK2,TAP2,HPRT1,ZC3H12A,TRAF6,IL27
171	hemopoiesis	GO:0030097	GO:BP	737	832	66	ENSSSCG00000000217,ENSSSCG00000001252,ENSSSCG00000001453,ENSSSCG00000001710,ENSSSCG00000001912,ENSSSCG00000001952,ENSSSCG00000001971,ENSSSCG00000004507,ENSSSCG00000005166,ENSSSCG00000005215,ENSSSCG00000006035,ENSSSCG00000006380,ENSSSCG00000006464,ENSSSCG00000006543,ENSSSCG00000006697,ENSSSCG00000008496,ENSSSCG00000008729,ENSSSCG00000009542,ENSSSCG00000009704,ENSSSCG00000010540,ENSSSCG00000010604,…	RACGAP1,UBD,HLA-DRA,RUNX2,PML,NFKBIA,HECTD1,SMAD7,MLLT3,JAK2,ANGPT1,SLAMF1,NTRK1,ADAR,ACP6,EIF2AK2,LYAR,TNFSF13B,HMGB2,ENTPD7,SH3PXD2A,NFKBIZ,OGT,ATP11C,MKNK2,AP3B1,IRF1,IL18,STAT1,FZD5,PTN,FST,IL31RA,CCR7,CSF3,TBX21,IL6,SLC4A2,BATF2,NRROS,TNFAIP6,RIPK2,IL17D,CASP10,VPS54,TNFRSF11B,SOCS1,EZH2,ZBTB16,STK4,PLA2G2D,ENSSSCG00000032422,GPR68,IRF8,DOCK1,INHBA,WNT5A,RAB7B,CTNNBIP1,ATP6AP1,ZC3H12A,TRAF6,…
172	response to oxygen-containing compound	GO:1901700	GO:BP	1087	832	87	ENSSSCG00000000396,ENSSSCG00000000475,ENSSSCG00000000625,ENSSSCG00000000661,ENSSSCG00000001567,ENSSSCG00000001710,ENSSSCG00000001920,ENSSSCG00000001952,ENSSSCG00000003805,ENSSSCG00000004110,ENSSSCG00000004154,ENSSSCG00000004789,ENSSSCG00000005215,ENSSSCG00000005385,ENSSSCG00000005423,ENSSSCG00000005724,ENSSSCG00000006371,ENSSSCG00000006728,ENSSSCG00000006862,ENSSSCG00000007007,ENSSSCG00000008629,…	STAT2,IRAK3,LRP6,PHC1,CPNE5,RUNX2,HCN4,NFKBIA,PDE4B,TAB2,TNFAIP3,THBS1,JAK2,NR4A3,ABCA1,SETX,USF1,GDAP2,VCAM1,IDO1,ROCK2,CMPK2,CXCL8,SPP1,ACOD1,HMGB2,P2RX7,ACTN2,RET,NEURL1,ADRA2A,SMARCC1,PLSCR4,APOD,NFKBIZ,OGT,ICAM1,HTR4,IL18,KYNU,STAT1,EPHA4,INSIG1,NOS3,CCR7,IL6,TIRAP,PRKCD,SLC2A4,RIPK2,ANO1,MT3,CX3CL1,TICAM1,CHRM3,RORC,VPS54,SOCS1,SOD3,EZH2,SESN2,IGF1R,RHOQ,PANX1,CASP7,CXCL10,PDCD1LG2,CXCL9,AQ…
173	regulation of biological quality	GO:0065008	GO:BP	2139	832	145	ENSSSCG00000000006,ENSSSCG00000000078,ENSSSCG00000000753,ENSSSCG00000001507,ENSSSCG00000001595,ENSSSCG00000001906,ENSSSCG00000001912,ENSSSCG00000001920,ENSSSCG00000003015,ENSSSCG00000003112,ENSSSCG00000003431,ENSSSCG00000003591,ENSSSCG00000003669,ENSSSCG00000003748,ENSSSCG00000003788,ENSSSCG00000004125,ENSSSCG00000004270,ENSSSCG00000004507,ENSSSCG00000004789,ENSSSCG00000004830,ENSSSCG00000005167,…	PPARA,TNRC6B,WNK1,TAPBP,DAAM2,CYP1A1,PML,HCN4,EXOSC5,BBC3,NPPB,PUM1,MFSD2A,CELF4,PTGER3,STX11,ADGRB3,SMAD7,THBS1,ENSSSCG00000004830,SLC24A2,JAK2,ABCA1,AGO2,CCN3,ANGPT1,FZD6,SELP,F5,NTRK1,CRABP2,ATP8B2,SNX27,MOV10,ABCA4,PCM1,PTGIS,ENSSSCG00000007527,MLST8,ADRA2B,RNF149,CAPG,PLEKHH2,ADRA2C,ATP10D,TEC,SPP1,AKAP11,MYCBP2,SLITRK5,P2RX7,ACTN2,RET,IFIT1,NEURL1,ADRA2A,SAMD4B,BAMBI,NRP1,PDE12,CLSTN2,PLSCR…
174	positive regulation of RNA biosynthetic process	GO:1902680	GO:BP	1369	832	103	ENSSSCG00000000006,ENSSSCG00000000396,ENSSSCG00000000625,ENSSSCG00000000700,ENSSSCG00000000950,ENSSSCG00000001509,ENSSSCG00000001667,ENSSSCG00000001710,ENSSSCG00000001952,ENSSSCG00000002002,ENSSSCG00000002755,ENSSSCG00000002836,ENSSSCG00000003197,ENSSSCG00000003419,ENSSSCG00000003989,ENSSSCG00000004551,ENSSSCG00000004859,ENSSSCG00000005166,ENSSSCG00000005215,ENSSSCG00000005268,ENSSSCG00000005385,…	PPARA,STAT2,LRP6,ACRBP,E2F7,DAXX,ZNF318,RUNX2,NFKBIA,IRF9,NFAT5,SALL1,MED25,MAD2L2,ENSSSCG00000003989,ZNF609,ZNF516,MLLT3,JAK2,RORB,NR4A3,SETX,AGO2,ATAD2,USF1,BCL9,PLAGL2,NFATC2IP,CIITA,TET3,REL,NCOA1,LYAR,JADE1,SPP1,ENSSSCG00000009240,HMBOX1,HMGB2,RET,NFKB2,ZNF281,ELF3,TOPORS,BAMBI,SMARCC1,DTX3L,NFKBIZ,OGT,HCFC1,IRF7,GAL,EHF,AP3B1,IRF1,TRIM21,NUP98,IL18,NAMPT,RNASEL,IRF2,NSD3,HOXD10,STAT1,INO80D…
175	organonitrogen compound metabolic process	GO:1901564	GO:BP	5538	832	312	ENSSSCG00000000006,ENSSSCG00000000061,ENSSSCG00000000078,ENSSSCG00000000135,ENSSSCG00000000148,ENSSSCG00000000396,ENSSSCG00000000457,ENSSSCG00000000475,ENSSSCG00000000625,ENSSSCG00000000665,ENSSSCG00000000730,ENSSSCG00000000753,ENSSSCG00000000774,ENSSSCG00000001233,ENSSSCG00000001252,ENSSSCG00000001382,ENSSSCG00000001463,ENSSSCG00000001509,ENSSSCG00000001549,ENSSSCG00000001869,ENSSSCG00000001906,…	PPARA,PMM1,TNRC6B,KCTD17,ENSSSCG00000000148,STAT2,USP15,IRAK3,LRP6,RIMKLB,PRMT8,WNK1,USP18,TRIM26,UBD,DDR1,PSMB9,DAXX,FKBP5,PEAK1,CYP1A1,PML,NFKBIA,HECTD1,SLCO3A1,FUT8,RIOX1,OTUB2,PPP4R4,WARS1,GAN,MLKL,N4BP1,EXOSC5,BBC3,MAD2L2,NPPB,UBR4,EIF4G3,PUM1,RHBDL2,MFSD2A,IMPACT,MOCOS,PDE4B,DOCK7,MOB3C,TAB2,TNFAIP3,TPD52L1,SMAD7,LIPG,LACTB,MAPK6,GATM,TTBK2,THBS1,CNDP2,JAK2,PSAT1,ABCA1,TRAF1,AGO2,ANGPT1,VCP…
176	response to lipid	GO:0033993	GO:BP	482	832	49	ENSSSCG00000000475,ENSSSCG00000000625,ENSSSCG00000000661,ENSSSCG00000001509,ENSSSCG00000001750,ENSSSCG00000001952,ENSSSCG00000003805,ENSSSCG00000004110,ENSSSCG00000004154,ENSSSCG00000005215,ENSSSCG00000005423,ENSSSCG00000005724,ENSSSCG00000006728,ENSSSCG00000007007,ENSSSCG00000008629,ENSSSCG00000008647,ENSSSCG00000008953,ENSSSCG00000009216,ENSSSCG00000009469,ENSSSCG00000009704,ENSSSCG00000009817,…	IRAK3,LRP6,PHC1,DAXX,PAQR8,NFKBIA,PDE4B,TAB2,TNFAIP3,JAK2,ABCA1,SETX,GDAP2,IDO1,ROCK2,CMPK2,CXCL8,SPP1,ACOD1,HMGB2,P2RX7,RET,PLSCR4,NFKBIZ,TRIM68,IL18,INSIG1,NOS3,CCR7,IL6,TIRAP,RIPK2,CX3CL1,TICAM1,RORC,VPS54,CASP7,CXCL10,PDCD1LG2,CXCL9,AQP1,TCF21,IRF8,F2R,WNT5A,ZC3H12A,TRAF6,HEYL,AQP3
177	system development	GO:0048731	GO:BP	2844	832	181	ENSSSCG00000000206,ENSSSCG00000000475,ENSSSCG00000000753,ENSSSCG00000000950,ENSSSCG00000001382,ENSSSCG00000001567,ENSSSCG00000001595,ENSSSCG00000001710,ENSSSCG00000001727,ENSSSCG00000001909,ENSSSCG00000001912,ENSSSCG00000001971,ENSSSCG00000002516,ENSSSCG00000002639,ENSSSCG00000002836,ENSSSCG00000003419,ENSSSCG00000003439,ENSSSCG00000003669,ENSSSCG00000003713,ENSSSCG00000003748,ENSSSCG00000003818,…	FAIM2,IRAK3,WNK1,E2F7,DDR1,CPNE5,DAAM2,RUNX2,TNFRSF21,STRA6,PML,HECTD1,WARS1,TUBB3,SALL1,MAD2L2,DHRS3,MFSD2A,IMPACT,CELF4,DOCK7,TACSTD2,TAB2,TNFAIP3,RSPO3,ADGRB3,SMAD7,ZNF609,MAPK6,THBS1,NIN,CD274,RORB,TNC,SETX,AGO2,CCN3,ANGPT1,FZD6,VPS13B,GPR161,DDR2,UHMK1,NTRK1,CRABP2,ADAR,PHGDH,HIPK1,SLC6A17,PCM1,IDO1,BFSP1,ZNF335,PTGIS,MICALL2,ENSSSCG00000007678,ABCA3,ADRA2B,CAPG,EFEMP1,NCOA1,ROCK2,ADRA2C,CXC…
178	apoptotic process	GO:0006915	GO:BP	1289	832	98	ENSSSCG00000000006,ENSSSCG00000000206,ENSSSCG00000000457,ENSSSCG00000000623,ENSSSCG00000000625,ENSSSCG00000001252,ENSSSCG00000001509,ENSSSCG00000001516,ENSSSCG00000001727,ENSSSCG00000001912,ENSSSCG00000003112,ENSSSCG00000004154,ENSSSCG00000004225,ENSSSCG00000004789,ENSSSCG00000005055,ENSSSCG00000005211,ENSSSCG00000005215,ENSSSCG00000005511,ENSSSCG00000005724,ENSSSCG00000006035,ENSSSCG00000006464,…	PPARA,FAIM2,USP15,BCL2L14,LRP6,UBD,DAXX,ENSSSCG00000001516,TNFRSF21,PML,BBC3,TNFAIP3,TPD52L1,THBS1,LGALS3,CD274,JAK2,TRAF1,SETX,ANGPT1,NTRK1,ADAR,CTSS,HIPK1,IDO1,PLAGL2,PTGIS,DCUN1D3,EIF2AK2,NCOA1,BTC,HMGB2,P2RX7,AIFM2,FAS,IFIT2,NEURL1,TOPORS,NRP1,SKIL,NFKBIZ,OGT,MKNK2,ICAM1,IRF1,ENSSSCG00000014997,ASNS,FRZB,CFLAR,FZD5,IL6,SCG2,TARDBP,PRKCD,RIPK2,TIGAR,MT3,CX3CL1,TICAM1,PMAIP1,HIPK2,CASP10,VPS54,…
179	intracellular receptor signaling pathway	GO:0030522	GO:BP	260	832	33	ENSSSCG00000000006,ENSSSCG00000000457,ENSSSCG00000001509,ENSSSCG00000001912,ENSSSCG00000001952,ENSSSCG00000003439,ENSSSCG00000003591,ENSSSCG00000004154,ENSSSCG00000005268,ENSSSCG00000005385,ENSSSCG00000007463,ENSSSCG00000008496,ENSSSCG00000008581,ENSSSCG00000009129,ENSSSCG00000009720,ENSSSCG00000012893,ENSSSCG00000013114,ENSSSCG00000014768,ENSSSCG00000015897,ENSSSCG00000017416,ENSSSCG00000017614,…	PPARA,USP15,DAXX,PML,NFKBIA,DHRS3,PUM1,TNFAIP3,RORB,NR4A3,PTGIS,EIF2AK2,NCOA1,TIFA,DDX60,UNC93B1,SLC15A3,TRIM68,IFIH1,DHX58,TRIM25,CGAS,RIPK2,RORC,EZH2,ALPK1,TCF21,C1QBP,RAB7B,HEYL,BMP2,FBXL2,OAS1
180	regulation of response to cytokine stimulus	GO:0060759	GO:BP	118	832	21	ENSSSCG00000000396,ENSSSCG00000000774,ENSSSCG00000006035,ENSSSCG00000006543,ENSSSCG00000006760,ENSSSCG00000007508,ENSSSCG00000009042,ENSSSCG00000011874,ENSSSCG00000012853,ENSSSCG00000015897,ENSSSCG00000024096,ENSSSCG00000024389,ENSSSCG00000027709,ENSSSCG00000027806,ENSSSCG00000034347,ENSSSCG00000035598,ENSSSCG00000035859,ENSSSCG00000039751,ENSSSCG00000040286,ENSSSCG00000040575,ENSSSCG00000046640	STAT2,USP18,ANGPT1,ADAR,HIPK1,ZBP1,OTUD4,PARP14,IRF7,IFIH1,RIPK2,SIGIRR,PARP9,SAMHD1,TRIM56,EDN1,WNT5A,NLRC5,CYLD,ISG15,OAS1
181	regulation of cytokine-mediated signaling pathway	GO:0001959	GO:BP	108	832	20	ENSSSCG00000000396,ENSSSCG00000000774,ENSSSCG00000006035,ENSSSCG00000006543,ENSSSCG00000006760,ENSSSCG00000007508,ENSSSCG00000009042,ENSSSCG00000011874,ENSSSCG00000012853,ENSSSCG00000024096,ENSSSCG00000024389,ENSSSCG00000027709,ENSSSCG00000027806,ENSSSCG00000034347,ENSSSCG00000035598,ENSSSCG00000035859,ENSSSCG00000039751,ENSSSCG00000040286,ENSSSCG00000040575,ENSSSCG00000046640	STAT2,USP18,ANGPT1,ADAR,HIPK1,ZBP1,OTUD4,PARP14,IRF7,RIPK2,SIGIRR,PARP9,SAMHD1,TRIM56,EDN1,WNT5A,NLRC5,CYLD,ISG15,OAS1
182	regulation of kinase activity	GO:0043549	GO:BP	531	832	52	ENSSSCG00000000475,ENSSSCG00000000625,ENSSSCG00000001509,ENSSSCG00000002516,ENSSSCG00000004110,ENSSSCG00000004154,ENSSSCG00000004225,ENSSSCG00000004789,ENSSSCG00000005215,ENSSSCG00000006035,ENSSSCG00000006338,ENSSSCG00000006464,ENSSSCG00000006543,ENSSSCG00000007331,ENSSSCG00000008122,ENSSSCG00000008703,ENSSSCG00000008965,ENSSSCG00000009817,ENSSSCG00000010199,ENSSSCG00000010603,ENSSSCG00000010629,…	IRAK3,LRP6,DAXX,WARS1,TAB2,TNFAIP3,TPD52L1,THBS1,JAK2,ANGPT1,DDR2,NTRK1,ADAR,RBL1,ADRA2B,ADRA2C,BTC,P2RX7,RET,NEURL1,ADRA2A,PRKAR2A,RUBCN,HEG1,HMGCR,CHORDC1,IL18,FZD5,EPHA4,CDK12,TIRAP,PDGFRB,PRKCD,TIGAR,MT3,FGF1,DVL2,SOCS1,EZH2,UVRAG,SESN2,IGF1R,DUSP16,EDN1,ECT2,WNT5A,GADD45A,TRAF6,BMP2,NLRC5,CBS,DEPTOR
183	positive regulation of protein phosphorylation	GO:0001934	GO:BP	516	832	51	ENSSSCG00000001509,ENSSSCG00000002263,ENSSSCG00000003419,ENSSSCG00000003818,ENSSSCG00000003897,ENSSSCG00000004110,ENSSSCG00000004225,ENSSSCG00000004789,ENSSSCG00000005215,ENSSSCG00000006035,ENSSSCG00000006338,ENSSSCG00000008044,ENSSSCG00000008122,ENSSSCG00000008629,ENSSSCG00000008703,ENSSSCG00000008965,ENSSSCG00000009817,ENSSSCG00000010199,ENSSSCG00000010448,ENSSSCG00000010603,ENSSSCG00000010629,…	DAXX,SLCO3A1,MAD2L2,DOCK7,MOB3C,TAB2,TPD52L1,THBS1,JAK2,ANGPT1,DDR2,MLST8,ADRA2B,ROCK2,ADRA2C,BTC,P2RX7,RET,FAS,NEURL1,ADRA2A,NRP1,PARP14,IL18,TNFSF18,FZD5,EPHA4,IL31RA,FAM20A,CSF3,IL6,TIRAP,PRKCD,RIPK2,MT3,CX3CL1,FGF1,DVL2,HIPK2,PARP9,SOCS1,EZH2,SESN2,STK4,EDN1,ECT2,WNT5A,TRAF6,APLNR,BMP2,OPRD1
184	negative regulation of defense response	GO:0031348	GO:BP	200	832	28	ENSSSCG00000000006,ENSSSCG00000000396,ENSSSCG00000000457,ENSSSCG00000000475,ENSSSCG00000000774,ENSSSCG00000004154,ENSSSCG00000006002,ENSSSCG00000006543,ENSSSCG00000007463,ENSSSCG00000008729,ENSSSCG00000009886,ENSSSCG00000011874,ENSSSCG00000014780,ENSSSCG00000017416,ENSSSCG00000021383,ENSSSCG00000022011,ENSSSCG00000023716,ENSSSCG00000027607,ENSSSCG00000027806,ENSSSCG00000029305,ENSSSCG00000035048,…	PPARA,STAT2,USP15,IRAK3,USP18,TNFAIP3,CCN3,ADAR,PTGIS,LYAR,TRAFD1,PARP14,TRIM21,DHX58,CGAS,NMI,TNFAIP6,IER3,SAMHD1,FNDC4,C1QBP,RAB7B,FEM1A,NLRC5,FBXL2,ISG15,GPR17,OAS1
185	positive regulation of NF-kappaB transcription factor activity	GO:0051092	GO:BP	120	832	21	ENSSSCG00000000186,ENSSSCG00000000475,ENSSSCG00000000932,ENSSSCG00000002263,ENSSSCG00000005511,ENSSSCG00000006464,ENSSSCG00000008496,ENSSSCG00000014670,ENSSSCG00000014768,ENSSSCG00000014780,ENSSSCG00000015037,ENSSSCG00000017614,ENSSSCG00000022413,ENSSSCG00000024096,ENSSSCG00000024759,ENSSSCG00000024771,ENSSSCG00000033222,ENSSSCG00000035153,ENSSSCG00000035859,ENSSSCG00000036352,ENSSSCG00000038082	RHEBL1,IRAK3,NTS,SLCO3A1,TRAF1,NTRK1,EIF2AK2,ENSSSCG00000014670,TRIM68,TRIM21,IL18,TRIM25,TIRAP,RIPK2,CX3CL1,TICAM1,TRIM14,TRIM38,WNT5A,RAB7B,TRAF6
186	positive regulation of programmed cell death	GO:0043068	GO:BP	387	832	42	ENSSSCG00000001252,ENSSSCG00000001912,ENSSSCG00000003112,ENSSSCG00000004225,ENSSSCG00000004789,ENSSSCG00000005211,ENSSSCG00000005215,ENSSSCG00000006648,ENSSSCG00000007007,ENSSSCG00000007243,ENSSSCG00000007463,ENSSSCG00000007508,ENSSSCG00000007854,ENSSSCG00000008581,ENSSSCG00000009817,ENSSSCG00000010258,ENSSSCG00000010448,ENSSSCG00000010451,ENSSSCG00000010603,ENSSSCG00000011746,ENSSSCG00000016018,…	UBD,PML,BBC3,TPD52L1,THBS1,CD274,JAK2,CTSS,IDO1,PLAGL2,PTGIS,ZBP1,DCUN1D3,NCOA1,P2RX7,AIFM2,FAS,IFIT2,NEURL1,SKIL,FRZB,IL6,PRKCD,RIPK2,TIGAR,GBP1,OLFM1,CD248,ZBTB16,STK4,ATP2A2,C1QBP,INHBA,ZNF268,ECT2,WNT5A,GADD45A,ZC3H12A,BMP2,CYLD,SOD2,TNFAIP8
187	regulation of programmed cell death	GO:0043067	GO:BP	1072	832	85	ENSSSCG00000000006,ENSSSCG00000000206,ENSSSCG00000000457,ENSSSCG00000000623,ENSSSCG00000000625,ENSSSCG00000001252,ENSSSCG00000001516,ENSSSCG00000001912,ENSSSCG00000003112,ENSSSCG00000004154,ENSSSCG00000004225,ENSSSCG00000004789,ENSSSCG00000005055,ENSSSCG00000005211,ENSSSCG00000005215,ENSSSCG00000005511,ENSSSCG00000005724,ENSSSCG00000006035,ENSSSCG00000006464,ENSSSCG00000006543,ENSSSCG00000006648,…	PPARA,FAIM2,USP15,BCL2L14,LRP6,UBD,ENSSSCG00000001516,PML,BBC3,TNFAIP3,TPD52L1,THBS1,LGALS3,CD274,JAK2,TRAF1,SETX,ANGPT1,NTRK1,ADAR,CTSS,IDO1,PLAGL2,PTGIS,ZBP1,DCUN1D3,EIF2AK2,NCOA1,BTC,HMGB2,P2RX7,AIFM2,FAS,IFIT2,NEURL1,XPNPEP1,NRP1,SKIL,ICAM1,ENSSSCG00000014997,ASNS,FRZB,CFLAR,IL6,SCG2,TARDBP,PRKCD,RIPK2,TIGAR,MT3,CX3CL1,GBP1,HIPK2,CASP10,VPS54,DHCR24,BIRC3,IER3,PIM2,OLFM1,CD248,ZBTB16,IGF1R,ST…
188	positive regulation of cytokine production	GO:0001819	GO:BP	360	832	40	ENSSSCG00000000475,ENSSSCG00000003805,ENSSSCG00000004789,ENSSSCG00000005211,ENSSSCG00000005215,ENSSSCG00000006380,ENSSSCG00000007007,ENSSSCG00000008496,ENSSSCG00000009704,ENSSSCG00000009817,ENSSSCG00000009881,ENSSSCG00000010629,ENSSSCG00000010900,ENSSSCG00000011859,ENSSSCG00000012853,ENSSSCG00000012893,ENSSSCG00000014277,ENSSSCG00000015037,ENSSSCG00000015897,ENSSSCG00000016057,ENSSSCG00000016140,…	IRAK3,PDE4B,THBS1,CD274,JAK2,SLAMF1,IDO1,EIF2AK2,HMGB2,P2RX7,OAS2,ADRA2A,DENND1B,HEG1,IRF7,UNC93B1,IRF1,IL18,IFIH1,STAT1,FZD5,DHX58,CCR7,TBX21,IL6,CGAS,TIRAP,RIPK2,TICAM1,IL17D,PANX1,IRF8,F2R,WNT5A,RAB7B,TRAF6,MAPK13,IL27,ISG15,OAS1
189	positive regulation of MAPK cascade	GO:0043410	GO:BP	375	832	41	ENSSSCG00000001523,ENSSSCG00000003601,ENSSSCG00000004225,ENSSSCG00000004789,ENSSSCG00000005511,ENSSSCG00000006035,ENSSSCG00000006380,ENSSSCG00000006464,ENSSSCG00000008122,ENSSSCG00000008496,ENSSSCG00000008703,ENSSSCG00000009817,ENSSSCG00000010199,ENSSSCG00000010629,ENSSSCG00000011020,ENSSSCG00000011102,ENSSSCG00000013655,ENSSSCG00000016140,ENSSSCG00000016230,ENSSSCG00000020970,ENSSSCG00000022413,…	GRM4,HCRTR1,TPD52L1,THBS1,TRAF1,ANGPT1,SLAMF1,NTRK1,ADRA2B,EIF2AK2,ADRA2C,P2RX7,RET,ADRA2A,JCAD,NRP1,ICAM1,FZD5,EPHA4,IL6,TIRAP,PDGFRB,RIPK2,MT3,CX3CL1,FGF1,DVL2,HIPK2,EZH2,IGF1R,CCL4,GDF15,F2R,EDN1,ENSSSCG00000035736,WNT5A,GADD45A,ZC3H12A,TRAF6,BMP2,CCL8
190	positive regulation of locomotion	GO:0040017	GO:BP	421	832	44	ENSSSCG00000000753,ENSSSCG00000001595,ENSSSCG00000003818,ENSSSCG00000004551,ENSSSCG00000004789,ENSSSCG00000005055,ENSSSCG00000005385,ENSSSCG00000005935,ENSSSCG00000006035,ENSSSCG00000006237,ENSSSCG00000006288,ENSSSCG00000006338,ENSSSCG00000006380,ENSSSCG00000008629,ENSSSCG00000008953,ENSSSCG00000010199,ENSSSCG00000010629,ENSSSCG00000011020,ENSSSCG00000011102,ENSSSCG00000013655,ENSSSCG00000014310,…	WNK1,DAAM2,DOCK7,ZNF609,THBS1,LGALS3,NR4A3,AGO2,ANGPT1,SDCBP,SELP,DDR2,SLAMF1,ROCK2,CXCL8,RET,ADRA2A,JCAD,NRP1,ICAM1,CXCL14,TNFSF18,EPHA4,NOS3,PTN,CCR7,PDGFRB,SCG2,CX3CL1,FGF1,DEFB1,IGF1R,STK4,SMURF2,CXCL10,AQP1,C1QBP,ZNF268,F2R,EDN1,WNT5A,ZC3H12A,BMP2,SOD2
191	cytosolic pattern recognition receptor signaling pathway	GO:0002753	GO:BP	102	832	19	ENSSSCG00000000457,ENSSSCG00000001952,ENSSSCG00000003591,ENSSSCG00000004154,ENSSSCG00000008496,ENSSSCG00000009129,ENSSSCG00000009720,ENSSSCG00000012893,ENSSSCG00000013114,ENSSSCG00000015897,ENSSSCG00000017416,ENSSSCG00000017614,ENSSSCG00000021383,ENSSSCG00000024096,ENSSSCG00000031348,ENSSSCG00000035048,ENSSSCG00000036352,ENSSSCG00000039802,ENSSSCG00000046640	USP15,NFKBIA,PUM1,TNFAIP3,EIF2AK2,TIFA,DDX60,UNC93B1,SLC15A3,IFIH1,DHX58,TRIM25,CGAS,RIPK2,ALPK1,C1QBP,RAB7B,FBXL2,OAS1
192	negative regulation of immune response	GO:0050777	GO:BP	134	832	22	ENSSSCG00000000396,ENSSSCG00000000457,ENSSSCG00000000475,ENSSSCG00000000774,ENSSSCG00000004154,ENSSSCG00000004507,ENSSSCG00000006380,ENSSSCG00000006543,ENSSSCG00000008729,ENSSSCG00000009886,ENSSSCG00000011874,ENSSSCG00000014780,ENSSSCG00000017416,ENSSSCG00000017517,ENSSSCG00000021383,ENSSSCG00000022011,ENSSSCG00000027806,ENSSSCG00000037815,ENSSSCG00000039751,ENSSSCG00000040575,ENSSSCG00000040850,…	STAT2,USP15,IRAK3,USP18,TNFAIP3,SMAD7,SLAMF1,ADAR,LYAR,TRAFD1,PARP14,TRIM21,DHX58,TBX21,CGAS,NMI,SAMHD1,ZC3H12A,NLRC5,ISG15,GPR17,OAS1
193	cellular response to lipid	GO:0071396	GO:BP	366	832	40	ENSSSCG00000000625,ENSSSCG00000000661,ENSSSCG00000001509,ENSSSCG00000001750,ENSSSCG00000001952,ENSSSCG00000003805,ENSSSCG00000004154,ENSSSCG00000005215,ENSSSCG00000005423,ENSSSCG00000005724,ENSSSCG00000008629,ENSSSCG00000008647,ENSSSCG00000008953,ENSSSCG00000009216,ENSSSCG00000009469,ENSSSCG00000009704,ENSSSCG00000010199,ENSSSCG00000011690,ENSSSCG00000011951,ENSSSCG00000014768,ENSSSCG00000015037,…	LRP6,PHC1,DAXX,PAQR8,NFKBIA,PDE4B,TNFAIP3,JAK2,ABCA1,SETX,ROCK2,CMPK2,CXCL8,SPP1,ACOD1,HMGB2,RET,PLSCR4,NFKBIZ,TRIM68,IL18,INSIG1,NOS3,IL6,RIPK2,CX3CL1,TICAM1,RORC,VPS54,CASP7,CXCL10,PDCD1LG2,CXCL9,AQP1,TCF21,IRF8,WNT5A,ZC3H12A,TRAF6,HEYL
194	regulation of apoptotic process	GO:0042981	GO:BP	1035	832	82	ENSSSCG00000000006,ENSSSCG00000000206,ENSSSCG00000000457,ENSSSCG00000000623,ENSSSCG00000000625,ENSSSCG00000001252,ENSSSCG00000001516,ENSSSCG00000001912,ENSSSCG00000003112,ENSSSCG00000004154,ENSSSCG00000004225,ENSSSCG00000004789,ENSSSCG00000005055,ENSSSCG00000005211,ENSSSCG00000005215,ENSSSCG00000005511,ENSSSCG00000005724,ENSSSCG00000006035,ENSSSCG00000006464,ENSSSCG00000006543,ENSSSCG00000006648,…	PPARA,FAIM2,USP15,BCL2L14,LRP6,UBD,ENSSSCG00000001516,PML,BBC3,TNFAIP3,TPD52L1,THBS1,LGALS3,CD274,JAK2,TRAF1,SETX,ANGPT1,NTRK1,ADAR,CTSS,IDO1,PLAGL2,PTGIS,DCUN1D3,EIF2AK2,NCOA1,BTC,HMGB2,P2RX7,AIFM2,FAS,IFIT2,NEURL1,NRP1,SKIL,ICAM1,ENSSSCG00000014997,ASNS,FRZB,CFLAR,IL6,SCG2,TARDBP,PRKCD,RIPK2,TIGAR,MT3,CX3CL1,HIPK2,CASP10,VPS54,DHCR24,BIRC3,IER3,PIM2,OLFM1,CD248,ZBTB16,IGF1R,STK4,CXCL10,AQP1,EYA…
195	catabolic process	GO:0009056	GO:BP	2033	832	137	ENSSSCG00000000006,ENSSSCG00000000078,ENSSSCG00000000135,ENSSSCG00000000457,ENSSSCG00000000475,ENSSSCG00000000774,ENSSSCG00000001252,ENSSSCG00000001463,ENSSSCG00000001912,ENSSSCG00000001971,ENSSSCG00000002298,ENSSSCG00000002841,ENSSSCG00000003015,ENSSSCG00000003419,ENSSSCG00000003488,ENSSSCG00000003591,ENSSSCG00000003669,ENSSSCG00000003805,ENSSSCG00000004154,ENSSSCG00000004507,ENSSSCG00000004509,…	PPARA,TNRC6B,KCTD17,USP15,IRAK3,USP18,UBD,PSMB9,PML,HECTD1,ZFYVE26,N4BP1,EXOSC5,MAD2L2,UBR4,PUM1,MFSD2A,PDE4B,TNFAIP3,SMAD7,LIPG,AGO2,SDCBP,CTSS,MOV10,DPYD,IDO1,RNF149,TET3,USP34,NBAS,SCARB2,SPP1,MYCBP2,P2RX7,ACAD10,ENTPD7,XPNPEP1,ADRA2A,SAMD4B,TOPORS,C9orf72,UPF2,NGLY1,SMARCC1,PDE12,XRN1,RUBCN,DTX3L,ASB9,FUNDC1,TIMP1,HUWE1,OGT,NAALADL1,HMGCR,ERAP1,DCP2,SLC6A7,ENSSSCG00000014670,TRIM68,TRIM21,ANK…
196	regulation of cell adhesion	GO:0030155	GO:BP	576	832	54	ENSSSCG00000000006,ENSSSCG00000000753,ENSSSCG00000001382,ENSSSCG00000001453,ENSSSCG00000001727,ENSSSCG00000001869,ENSSSCG00000001912,ENSSSCG00000002755,ENSSSCG00000003419,ENSSSCG00000003832,ENSSSCG00000004507,ENSSSCG00000004687,ENSSSCG00000004789,ENSSSCG00000005211,ENSSSCG00000005215,ENSSSCG00000005385,ENSSSCG00000005494,ENSSSCG00000006035,ENSSSCG00000006288,ENSSSCG00000006380,ENSSSCG00000006862,…	PPARA,WNK1,DDR1,HLA-DRA,TNFRSF21,PEAK1,PML,NFAT5,MAD2L2,TACSTD2,SMAD7,ENSSSCG00000004687,THBS1,CD274,JAK2,NR4A3,TNC,ANGPT1,SELP,SLAMF1,VCAM1,IDO1,CXCL8,TNFSF13B,RET,NRP1,APOD,MELTF,NFKBIZ,AP3B1,IRF1,IL18,TNFSF18,EPHA4,MYO10,CCR7,TBX21,ENSSSCG00000017754,IL6,PRKCD,RIPK2,CX3CL1,GBP1,SOCS1,ZBTB16,STK4,PLA2G2D,PDCD1LG2,C1QBP,WNT5A,ZC3H12A,TRAF6,RND1,BMP2
197	regulation of catabolic process	GO:0009894	GO:BP	768	832	66	ENSSSCG00000000006,ENSSSCG00000000078,ENSSSCG00000000475,ENSSSCG00000001912,ENSSSCG00000002841,ENSSSCG00000003015,ENSSSCG00000003419,ENSSSCG00000003591,ENSSSCG00000003669,ENSSSCG00000004154,ENSSSCG00000004507,ENSSSCG00000005935,ENSSSCG00000006237,ENSSSCG00000006776,ENSSSCG00000008621,ENSSSCG00000008980,ENSSSCG00000009473,ENSSSCG00000009817,ENSSSCG00000010629,ENSSSCG00000010706,ENSSSCG00000011010,…	PPARA,TNRC6B,IRAK3,PML,N4BP1,EXOSC5,MAD2L2,PUM1,MFSD2A,TNFAIP3,SMAD7,AGO2,SDCBP,MOV10,NBAS,SCARB2,MYCBP2,P2RX7,ADRA2A,SAMD4B,C9orf72,SMARCC1,PDE12,RUBCN,DTX3L,ASB9,TIMP1,OGT,HMGCR,DCP2,ENSSSCG00000014670,TRIM68,TRIM21,ANKIB1,RNASEL,NUB1,ZC3HAV1,IL6,TIRAP,DCP1A,PPP1R3B,TARDBP,SAMD4A,PRKCD,RIPK2,TIGAR,RAB39B,DCAF12,TICAM1,RNF19B,HIPK2,IER3,TMEM9,PIM2,UVRAG,SESN2,VGLL4,DESI1,TNRC6C,TRIM38,WNT5A,SNX4…
198	cell activation	GO:0001775	GO:BP	787	832	67	ENSSSCG00000001252,ENSSSCG00000001453,ENSSSCG00000001710,ENSSSCG00000001727,ENSSSCG00000001971,ENSSSCG00000003419,ENSSSCG00000004154,ENSSSCG00000004507,ENSSSCG00000004687,ENSSSCG00000004789,ENSSSCG00000005055,ENSSSCG00000005211,ENSSSCG00000005215,ENSSSCG00000006052,ENSSSCG00000006288,ENSSSCG00000006378,ENSSSCG00000006380,ENSSSCG00000006464,ENSSSCG00000006862,ENSSSCG00000007007,ENSSSCG00000007432,…	UBD,HLA-DRA,RUNX2,TNFRSF21,HECTD1,MAD2L2,TNFAIP3,SMAD7,ENSSSCG00000004687,THBS1,LGALS3,CD274,JAK2,FZD6,SELP,SLAMF7,SLAMF1,NTRK1,VCAM1,IDO1,ZNF335,ADRA2B,ADRA2C,TEC,CXCL8,TNFSF13B,P2RX7,UNG,ENTPD7,NFKB2,ADRA2A,HMCES,NFKBIZ,ATP11C,ICAM1,AP3B1,IRF1,IL18,TNFSF18,FZD5,CCR7,TBX21,ENSSSCG00000017754,SUPT6H,IL6,NMI,BATF2,PLA2G4A,PRKCD,RIPK2,TICAM1,SOCS1,EZH2,ZBTB16,PLA2G2D,RASSF5,CXCL10,PDCD1LG2,HPRT1,IR…
199	regulation of cellular component organization	GO:0051128	GO:BP	1795	832	124	ENSSSCG00000000135,ENSSSCG00000000396,ENSSSCG00000000475,ENSSSCG00000000523,ENSSSCG00000001382,ENSSSCG00000001567,ENSSSCG00000001595,ENSSSCG00000001869,ENSSSCG00000001912,ENSSSCG00000001958,ENSSSCG00000002516,ENSSSCG00000003112,ENSSSCG00000003197,ENSSSCG00000003419,ENSSSCG00000003669,ENSSSCG00000003832,ENSSSCG00000004270,ENSSSCG00000004507,ENSSSCG00000004718,ENSSSCG00000005022,ENSSSCG00000005055,…	KCTD17,STAT2,IRAK3,BBS10,DDR1,CPNE5,DAAM2,PEAK1,PML,BAZ1A,WARS1,BBC3,MED25,MAD2L2,MFSD2A,TACSTD2,ADGRB3,SMAD7,TTBK2,NIN,LGALS3,MLLT3,MPDZ,ABCA1,TNC,SETX,CCN3,ANGPT1,SDCBP,SELP,DDR2,SLAMF1,NTRK1,CRABP2,NES,PHF20,DCUN1D3,MLST8,ABCA3,CAPG,PLEKHH2,EIF2AK2,ROCK2,LYAR,BTC,JADE1,ARHGAP24,MYCBP2,SLITRK5,HMBOX1,KIF13B,P2RX7,ACTN2,RET,NEURL1,STN1,C9orf72,NRP1,USP6NL,CLSTN2,APOD,MELTF,RUBCN,HUWE1,OGT,HCFC1,…
200	positive regulation of apoptotic process	GO:0043065	GO:BP	373	832	40	ENSSSCG00000001252,ENSSSCG00000001912,ENSSSCG00000003112,ENSSSCG00000004225,ENSSSCG00000004789,ENSSSCG00000005211,ENSSSCG00000005215,ENSSSCG00000006648,ENSSSCG00000007007,ENSSSCG00000007243,ENSSSCG00000007463,ENSSSCG00000007854,ENSSSCG00000008581,ENSSSCG00000009817,ENSSSCG00000010258,ENSSSCG00000010448,ENSSSCG00000010451,ENSSSCG00000010603,ENSSSCG00000011746,ENSSSCG00000016018,ENSSSCG00000020970,…	UBD,PML,BBC3,TPD52L1,THBS1,CD274,JAK2,CTSS,IDO1,PLAGL2,PTGIS,DCUN1D3,NCOA1,P2RX7,AIFM2,FAS,IFIT2,NEURL1,SKIL,FRZB,IL6,PRKCD,RIPK2,TIGAR,OLFM1,CD248,ZBTB16,STK4,ATP2A2,C1QBP,INHBA,ZNF268,ECT2,WNT5A,GADD45A,ZC3H12A,BMP2,CYLD,SOD2,TNFAIP8
201	adaptive immune response	GO:0002250	GO:BP	317	832	36	ENSSSCG00000001341,ENSSSCG00000001394,ENSSSCG00000001453,ENSSSCG00000001727,ENSSSCG00000003419,ENSSSCG00000004154,ENSSSCG00000004507,ENSSSCG00000005211,ENSSSCG00000005215,ENSSSCG00000006380,ENSSSCG00000006648,ENSSSCG00000008820,ENSSSCG00000009542,ENSSSCG00000009817,ENSSSCG00000009938,ENSSSCG00000010540,ENSSSCG00000010580,ENSSSCG00000010900,ENSSSCG00000011611,ENSSSCG00000011951,ENSSSCG00000012853,…	ENSSSCG00000001341,ENSSSCG00000001394,HLA-DRA,TNFRSF21,MAD2L2,TNFAIP3,SMAD7,CD274,JAK2,SLAMF1,CTSS,TEC,TNFSF13B,P2RX7,UNG,ENTPD7,NFKB2,DENND1B,HMCES,NFKBIZ,IRF7,UNC93B1,ICAM1,IL18,FZD5,TBX21,SUPT6H,IL6,PRKCD,RIPK2,TAP2,TAP1,HPRT1,ZC3H12A,TRAF6,IL27
202	regulation of type I interferon-mediated signaling pathway	GO:0060338	GO:BP	35	832	11	ENSSSCG00000000396,ENSSSCG00000000774,ENSSSCG00000006543,ENSSSCG00000007508,ENSSSCG00000012853,ENSSSCG00000027806,ENSSSCG00000034347,ENSSSCG00000035859,ENSSSCG00000039751,ENSSSCG00000040575,ENSSSCG00000046640	STAT2,USP18,ADAR,ZBP1,IRF7,SAMHD1,TRIM56,WNT5A,NLRC5,ISG15,OAS1
203	response to endogenous stimulus	GO:0009719	GO:BP	1154	832	88	ENSSSCG00000000006,ENSSSCG00000000396,ENSSSCG00000000457,ENSSSCG00000001509,ENSSSCG00000001710,ENSSSCG00000001750,ENSSSCG00000001912,ENSSSCG00000001920,ENSSSCG00000002283,ENSSSCG00000003601,ENSSSCG00000003805,ENSSSCG00000004507,ENSSSCG00000004789,ENSSSCG00000005215,ENSSSCG00000005385,ENSSSCG00000005724,ENSSSCG00000006237,ENSSSCG00000006371,ENSSSCG00000006464,ENSSSCG00000006648,ENSSSCG00000006862,…	PPARA,STAT2,USP15,DAXX,RUNX2,PAQR8,PML,HCN4,FUT8,HCRTR1,PDE4B,SMAD7,THBS1,JAK2,NR4A3,SETX,SDCBP,USF1,NTRK1,CTSS,VCAM1,NCOA1,ROCK2,HTRA3,RASL11B,CXCL8,HHIP,HMGB2,ACTN2,NEURL1,ADRA2A,BAMBI,JCAD,NRP1,SMARCC1,SKIL,NFKBIZ,TIMP1,SMC1A,OGT,ICAM1,HTR4,TRIM68,ELAPOR2,STAT1,EPHA4,AOC1,FST,TRIM25,PELP1,IL6,PDGFRB,PRKCD,NRROS,TNFAIP6,SLC2A4,RIPK2,TIGAR,MT3,TICAM1,FGF1,VASN,CHRM3,HIPK2,VPS54,SOCS1,EZH2,FNDC4,…
204	macromolecule catabolic process	GO:0009057	GO:BP	1137	832	87	ENSSSCG00000000078,ENSSSCG00000000135,ENSSSCG00000000457,ENSSSCG00000000475,ENSSSCG00000000774,ENSSSCG00000001252,ENSSSCG00000001463,ENSSSCG00000001912,ENSSSCG00000001971,ENSSSCG00000002841,ENSSSCG00000003015,ENSSSCG00000003419,ENSSSCG00000003488,ENSSSCG00000003591,ENSSSCG00000004154,ENSSSCG00000004507,ENSSSCG00000005935,ENSSSCG00000006237,ENSSSCG00000006648,ENSSSCG00000006776,ENSSSCG00000008168,…	TNRC6B,KCTD17,USP15,IRAK3,USP18,UBD,PSMB9,PML,HECTD1,N4BP1,EXOSC5,MAD2L2,UBR4,PUM1,TNFAIP3,SMAD7,AGO2,SDCBP,CTSS,MOV10,RNF149,USP34,NBAS,MYCBP2,P2RX7,ADRA2A,SAMD4B,TOPORS,UPF2,NGLY1,SMARCC1,PDE12,XRN1,DTX3L,ASB9,TIMP1,OGT,HMGCR,DCP2,SLC6A7,TRIM21,ANKIB1,RNASEL,EPHA4,NUB1,ZC3HAV1,TBX21,TRIM25,IL6,HERC6,TIRAP,DCP1A,PPP1R3B,TARDBP,UBE2L6,SAMD4A,DCAF12,RNASEH2B,ISG20,RNF19B,HIPK2,PSMB8,VPS54,IER3,TME…
205	homeostatic process	GO:0042592	GO:BP	1297	832	96	ENSSSCG00000000135,ENSSSCG00000000217,ENSSSCG00000000523,ENSSSCG00000000753,ENSSSCG00000001912,ENSSSCG00000002671,ENSSSCG00000003112,ENSSSCG00000003601,ENSSSCG00000003669,ENSSSCG00000003805,ENSSSCG00000004154,ENSSSCG00000004509,ENSSSCG00000004565,ENSSSCG00000004672,ENSSSCG00000004859,ENSSSCG00000005167,ENSSSCG00000005215,ENSSSCG00000005423,ENSSSCG00000006002,ENSSSCG00000006035,ENSSSCG00000006071,…	KCTD17,RACGAP1,BBS10,WNK1,PML,ATP2C2,BBC3,HCRTR1,MFSD2A,PDE4B,TNFAIP3,LIPG,CA12,GATM,ZNF516,SLC24A2,JAK2,ABCA1,CCN3,ANGPT1,VPS13B,USF1,ADAR,ABCA4,ENSSSCG00000007527,ABCA3,LYAR,CXCL11,SPP1,AKAP11,TNFSF13B,HMGB2,P2RX7,HECTD4,ADRA2A,IP6K1,NPHP3,SKIL,NFKBIZ,OGT,PACS1,ICAM1,AP3B1,HTR4,PIWIL4,IL18,STEAP4,STAT1,CMKLR2,INSIG1,NOS3,STC2,FAM20A,CCR7,MED13,TRPV2,SLC41A1,IL6,SLC4A2,RAB20,SLC2A4,ANO1,MT3,CX3C…
206	regulation of canonical NF-kappaB signal transduction	GO:0043122	GO:BP	176	832	25	ENSSSCG00000001252,ENSSSCG00000004110,ENSSSCG00000004154,ENSSSCG00000005511,ENSSSCG00000006035,ENSSSCG00000008388,ENSSSCG00000009129,ENSSSCG00000010454,ENSSSCG00000014670,ENSSSCG00000014768,ENSSSCG00000014780,ENSSSCG00000016057,ENSSSCG00000016101,ENSSSCG00000017614,ENSSSCG00000022413,ENSSSCG00000024096,ENSSSCG00000024771,ENSSSCG00000026940,ENSSSCG00000028964,ENSSSCG00000031348,ENSSSCG00000035153,…	UBD,TAB2,TNFAIP3,TRAF1,ANGPT1,REL,TIFA,IFIT5,ENSSSCG00000014670,TRIM68,TRIM21,STAT1,CFLAR,TRIM25,TIRAP,RIPK2,TICAM1,CASP10,PIM2,ALPK1,TRIM38,F2R,WNT5A,ZC3H12A,TRAF6
207	protein metabolic process	GO:0019538	GO:BP	4770	832	271	ENSSSCG00000000061,ENSSSCG00000000078,ENSSSCG00000000135,ENSSSCG00000000148,ENSSSCG00000000396,ENSSSCG00000000457,ENSSSCG00000000475,ENSSSCG00000000625,ENSSSCG00000000665,ENSSSCG00000000730,ENSSSCG00000000753,ENSSSCG00000000774,ENSSSCG00000001233,ENSSSCG00000001252,ENSSSCG00000001382,ENSSSCG00000001463,ENSSSCG00000001509,ENSSSCG00000001549,ENSSSCG00000001869,ENSSSCG00000001912,ENSSSCG00000001952,…	PMM1,TNRC6B,KCTD17,ENSSSCG00000000148,STAT2,USP15,IRAK3,LRP6,RIMKLB,PRMT8,WNK1,USP18,TRIM26,UBD,DDR1,PSMB9,DAXX,FKBP5,PEAK1,PML,NFKBIA,HECTD1,SLCO3A1,FUT8,RIOX1,OTUB2,PPP4R4,WARS1,GAN,MLKL,N4BP1,EXOSC5,BBC3,MAD2L2,NPPB,UBR4,EIF4G3,PUM1,RHBDL2,IMPACT,MOCOS,DOCK7,MOB3C,TAB2,TNFAIP3,TPD52L1,SMAD7,LIPG,LACTB,MAPK6,TTBK2,THBS1,CNDP2,JAK2,ABCA1,TRAF1,AGO2,ANGPT1,VCPIP1,SDCBP,DDR2,UHMK1,B4GALT3,NTRK1,AD…
208	negative regulation of cellular biosynthetic process	GO:0031327	GO:BP	1949	832	131	ENSSSCG00000000006,ENSSSCG00000000078,ENSSSCG00000000475,ENSSSCG00000000932,ENSSSCG00000000950,ENSSSCG00000001509,ENSSSCG00000001561,ENSSSCG00000001667,ENSSSCG00000001710,ENSSSCG00000001727,ENSSSCG00000001912,ENSSSCG00000001958,ENSSSCG00000002344,ENSSSCG00000002836,ENSSSCG00000002841,ENSSSCG00000003015,ENSSSCG00000003197,ENSSSCG00000003241,ENSSSCG00000003419,ENSSSCG00000003488,ENSSSCG00000003591,…	PPARA,TNRC6B,IRAK3,NTS,E2F7,DAXX,ETV7,ZNF318,RUNX2,TNFRSF21,PML,BAZ1A,RIOX1,SALL1,N4BP1,EXOSC5,MED25,ZNF614,MAD2L2,UBR4,PUM1,IMPACT,CELF4,TNFAIP3,SMAD7,THBS1,CD274,TLE4,AGO2,ANGPT1,SDCBP,SLAMF1,ADAR,MOV10,IDO1,RBL1,PTGIS,CIITA,ENSSSCG00000008147,REL,EIF2AK2,NBAS,ROCK2,LYAR,CXCL8,HMBOX1,HMGB2,STN1,SAMD4B,ZNF281,ELF3,UPF2,PDE12,XRN1,SKIL,APOD,PARP14,MORC3,BCOR,ENSSSCG00000012264,ZNF555,NACC1,ZNF672…
209	positive regulation of gene expression	GO:0010628	GO:BP	903	832	73	ENSSSCG00000000475,ENSSSCG00000000932,ENSSSCG00000001710,ENSSSCG00000002516,ENSSSCG00000002755,ENSSSCG00000003419,ENSSSCG00000003713,ENSSSCG00000003748,ENSSSCG00000003805,ENSSSCG00000004789,ENSSSCG00000005211,ENSSSCG00000005215,ENSSSCG00000005494,ENSSSCG00000005724,ENSSSCG00000005935,ENSSSCG00000006035,ENSSSCG00000006342,ENSSSCG00000006380,ENSSSCG00000006543,ENSSSCG00000007007,ENSSSCG00000008496,…	IRAK3,NTS,RUNX2,WARS1,NFAT5,MAD2L2,IMPACT,CELF4,PDE4B,THBS1,CD274,JAK2,TNC,SETX,AGO2,ANGPT1,UHMK1,SLAMF1,ADAR,IDO1,EIF2AK2,NBAS,ROCK2,CXCL8,HMGB2,P2RX7,OAS2,RET,BLNK,ADRA2A,DENND1B,HMCES,MELTF,HEG1,OGT,HCFC1,IRF7,UNC93B1,IRF1,NUP98,IL18,IFIH1,ZNF804A,STAT1,FZD5,NOS3,DHX58,CCR7,TBX21,ENSSSCG00000017754,IL6,CGAS,TIRAP,TARDBP,SAMD4A,RIPK2,MT3,TICAM1,IL17D,PANX1,IRF8,INHBA,F2R,PLSCR1,WNT5A,RAB7B,ZC3H…
210	positive regulation of cell migration	GO:0030335	GO:BP	394	832	41	ENSSSCG00000000753,ENSSSCG00000001595,ENSSSCG00000003818,ENSSSCG00000004551,ENSSSCG00000004789,ENSSSCG00000005055,ENSSSCG00000005385,ENSSSCG00000005935,ENSSSCG00000006035,ENSSSCG00000006237,ENSSSCG00000006288,ENSSSCG00000006338,ENSSSCG00000006380,ENSSSCG00000008629,ENSSSCG00000010199,ENSSSCG00000010629,ENSSSCG00000011020,ENSSSCG00000011102,ENSSSCG00000013655,ENSSSCG00000014310,ENSSSCG00000015487,…	WNK1,DAAM2,DOCK7,ZNF609,THBS1,LGALS3,NR4A3,AGO2,ANGPT1,SDCBP,SELP,DDR2,SLAMF1,ROCK2,RET,ADRA2A,JCAD,NRP1,ICAM1,CXCL14,TNFSF18,EPHA4,NOS3,PTN,CCR7,PDGFRB,CX3CL1,FGF1,IGF1R,STK4,SMURF2,CXCL10,AQP1,C1QBP,ZNF268,F2R,EDN1,WNT5A,ZC3H12A,BMP2,SOD2
211	regulation of extrinsic apoptotic signaling pathway	GO:2001236	GO:BP	120	832	20	ENSSSCG00000000206,ENSSSCG00000000623,ENSSSCG00000001912,ENSSSCG00000004154,ENSSSCG00000004789,ENSSSCG00000005055,ENSSSCG00000005511,ENSSSCG00000009704,ENSSSCG00000011102,ENSSSCG00000011746,ENSSSCG00000013655,ENSSSCG00000016101,ENSSSCG00000023032,ENSSSCG00000030820,ENSSSCG00000034139,ENSSSCG00000034570,ENSSSCG00000035077,ENSSSCG00000037549,ENSSSCG00000040286,ENSSSCG00000049630	FAIM2,BCL2L14,PML,TNFAIP3,THBS1,LGALS3,TRAF1,HMGB2,NRP1,SKIL,ICAM1,CFLAR,SCG2,STK4,EYA4,IFI6,INHBA,GCLM,CYLD,DEPTOR
212	cellular nitrogen compound biosynthetic process	GO:0044271	GO:BP	4125	832	240	ENSSSCG00000000006,ENSSSCG00000000061,ENSSSCG00000000078,ENSSSCG00000000186,ENSSSCG00000000396,ENSSSCG00000000457,ENSSSCG00000000475,ENSSSCG00000000625,ENSSSCG00000000700,ENSSSCG00000000932,ENSSSCG00000000950,ENSSSCG00000001233,ENSSSCG00000001509,ENSSSCG00000001561,ENSSSCG00000001667,ENSSSCG00000001710,ENSSSCG00000001912,ENSSSCG00000001952,ENSSSCG00000001958,ENSSSCG00000002002,ENSSSCG00000002263,…	PPARA,PMM1,TNRC6B,RHEBL1,STAT2,USP15,IRAK3,LRP6,ACRBP,NTS,E2F7,TRIM26,DAXX,ETV7,ZNF318,RUNX2,PML,NFKBIA,BAZ1A,IRF9,SLCO3A1,RIOX1,WARS1,NFAT5,SALL1,EXOSC5,MED25,ZNF614,MAD2L2,NPPB,EIF4G3,PUM1,RLF,IMPACT,ENSSSCG00000003989,HIVEP2,TNFAIP3,SMAD7,ZNF609,THBS1,ZNF516,MLLT3,JAK2,RORB,TLE4,NR4A3,TRAF1,SETX,AGO2,ATAD2,FZD6,ZFHX4,SDCBP,DDR2,UHMK1,B4GALT3,USF1,NTRK1,BCL9,MOV10,IDO1,ENSSSCG00000007023,PLAGL2…
213	cell chemotaxis	GO:0060326	GO:BP	229	832	29	ENSSSCG00000000753,ENSSSCG00000003805,ENSSSCG00000004789,ENSSSCG00000005055,ENSSSCG00000006002,ENSSSCG00000006380,ENSSSCG00000008953,ENSSSCG00000008959,ENSSSCG00000008978,ENSSSCG00000009704,ENSSSCG00000011102,ENSSSCG00000014310,ENSSSCG00000016522,ENSSSCG00000016885,ENSSSCG00000017466,ENSSSCG00000022741,ENSSSCG00000023032,ENSSSCG00000023503,ENSSSCG00000023716,ENSSSCG00000024759,ENSSSCG00000024954,…	WNK1,PDE4B,THBS1,LGALS3,CCN3,SLAMF1,CXCL8,CXCL2,CXCL11,HMGB2,NRP1,CXCL14,PTN,ITGA1,CCR7,PDGFRB,SCG2,PRKCD,TNFAIP6,CX3CL1,FGF1,DEFB1,CCL4,CXCL10,CXCL9,C1QBP,ENSSSCG00000035736,WNT5A,CCL8
214	negative regulation of biosynthetic process	GO:0009890	GO:BP	1954	832	131	ENSSSCG00000000006,ENSSSCG00000000078,ENSSSCG00000000475,ENSSSCG00000000932,ENSSSCG00000000950,ENSSSCG00000001509,ENSSSCG00000001561,ENSSSCG00000001667,ENSSSCG00000001710,ENSSSCG00000001727,ENSSSCG00000001912,ENSSSCG00000001958,ENSSSCG00000002344,ENSSSCG00000002836,ENSSSCG00000002841,ENSSSCG00000003015,ENSSSCG00000003197,ENSSSCG00000003241,ENSSSCG00000003419,ENSSSCG00000003488,ENSSSCG00000003591,…	PPARA,TNRC6B,IRAK3,NTS,E2F7,DAXX,ETV7,ZNF318,RUNX2,TNFRSF21,PML,BAZ1A,RIOX1,SALL1,N4BP1,EXOSC5,MED25,ZNF614,MAD2L2,UBR4,PUM1,IMPACT,CELF4,TNFAIP3,SMAD7,THBS1,CD274,TLE4,AGO2,ANGPT1,SDCBP,SLAMF1,ADAR,MOV10,IDO1,RBL1,PTGIS,CIITA,ENSSSCG00000008147,REL,EIF2AK2,NBAS,ROCK2,LYAR,CXCL8,HMBOX1,HMGB2,STN1,SAMD4B,ZNF281,ELF3,UPF2,PDE12,XRN1,SKIL,APOD,PARP14,MORC3,BCOR,ENSSSCG00000012264,ZNF555,NACC1,ZNF672…
215	negative regulation of cytokine production	GO:0001818	GO:BP	204	832	27	ENSSSCG00000000006,ENSSSCG00000000475,ENSSSCG00000001727,ENSSSCG00000001912,ENSSSCG00000002841,ENSSSCG00000004154,ENSSSCG00000004507,ENSSSCG00000004789,ENSSSCG00000005211,ENSSSCG00000006035,ENSSSCG00000006380,ENSSSCG00000007007,ENSSSCG00000008388,ENSSSCG00000011831,ENSSSCG00000012055,ENSSSCG00000017416,ENSSSCG00000017466,ENSSSCG00000017517,ENSSSCG00000017754,ENSSSCG00000022011,ENSSSCG00000024389,…	PPARA,IRAK3,TNFRSF21,PML,N4BP1,TNFAIP3,SMAD7,THBS1,CD274,ANGPT1,SLAMF1,IDO1,REL,APOD,MORC3,DHX58,CCR7,TBX21,ENSSSCG00000017754,NMI,SIGIRR,CX3CL1,GBP1,PDCD1LG2,C1QBP,ZC3H12A,OAS1
216	positive regulation of cell motility	GO:2000147	GO:BP	411	832	42	ENSSSCG00000000753,ENSSSCG00000001595,ENSSSCG00000003818,ENSSSCG00000004551,ENSSSCG00000004789,ENSSSCG00000005055,ENSSSCG00000005385,ENSSSCG00000005935,ENSSSCG00000006035,ENSSSCG00000006237,ENSSSCG00000006288,ENSSSCG00000006338,ENSSSCG00000006380,ENSSSCG00000008629,ENSSSCG00000010199,ENSSSCG00000010629,ENSSSCG00000011020,ENSSSCG00000011102,ENSSSCG00000013655,ENSSSCG00000014310,ENSSSCG00000015487,…	WNK1,DAAM2,DOCK7,ZNF609,THBS1,LGALS3,NR4A3,AGO2,ANGPT1,SDCBP,SELP,DDR2,SLAMF1,ROCK2,RET,ADRA2A,JCAD,NRP1,ICAM1,CXCL14,TNFSF18,EPHA4,NOS3,PTN,CCR7,PDGFRB,CX3CL1,FGF1,DEFB1,IGF1R,STK4,SMURF2,CXCL10,AQP1,C1QBP,ZNF268,F2R,EDN1,WNT5A,ZC3H12A,BMP2,SOD2
217	negative regulation of protein metabolic process	GO:0051248	GO:BP	740	832	63	ENSSSCG00000000078,ENSSSCG00000000475,ENSSSCG00000000625,ENSSSCG00000001912,ENSSSCG00000002469,ENSSSCG00000002474,ENSSSCG00000002516,ENSSSCG00000002841,ENSSSCG00000003015,ENSSSCG00000003419,ENSSSCG00000003591,ENSSSCG00000003713,ENSSSCG00000004154,ENSSSCG00000004507,ENSSSCG00000004789,ENSSSCG00000005935,ENSSSCG00000006035,ENSSSCG00000006237,ENSSSCG00000006543,ENSSSCG00000006776,ENSSSCG00000007854,…	TNRC6B,IRAK3,LRP6,PML,OTUB2,PPP4R4,WARS1,N4BP1,EXOSC5,MAD2L2,PUM1,IMPACT,TNFAIP3,SMAD7,THBS1,AGO2,ANGPT1,SDCBP,ADAR,MOV10,DCUN1D3,SPRED2,EIF2AK2,ROCK2,MYCBP2,SAMD4B,C9orf72,SMARCC1,PRKAR2A,PDE12,APOD,HEG1,PARP14,DTX3L,TIMP1,OGT,HMGCR,DCP2,SPINK9,TRIM21,CHORDC1,EPHA4,DCP1A,TARDBP,SAMD4A,PRKCD,PTPN13,HIPK2,DHCR24,SOCS1,SESN2,INPP5J,LIMK1,DUSP16,AQP1,TNRC6C,IFI6,EDN1,GADD45A,ZC3H12A,BMP2,ISG15,DEPTOR
218	regulation of adaptive immune response	GO:0002819	GO:BP	156	832	23	ENSSSCG00000001341,ENSSSCG00000001394,ENSSSCG00000001453,ENSSSCG00000003419,ENSSSCG00000004154,ENSSSCG00000004507,ENSSSCG00000005211,ENSSSCG00000006380,ENSSSCG00000009542,ENSSSCG00000009817,ENSSSCG00000010900,ENSSSCG00000011611,ENSSSCG00000011951,ENSSSCG00000012853,ENSSSCG00000015037,ENSSSCG00000016140,ENSSSCG00000017517,ENSSSCG00000017773,ENSSSCG00000024096,ENSSSCG00000025593,ENSSSCG00000037815,…	ENSSSCG00000001341,ENSSSCG00000001394,HLA-DRA,MAD2L2,TNFAIP3,SMAD7,CD274,SLAMF1,TNFSF13B,P2RX7,DENND1B,HMCES,NFKBIZ,IRF7,IL18,FZD5,TBX21,SUPT6H,RIPK2,TAP2,ZC3H12A,TRAF6,IL27
219	regulation of interleukin-1 beta production	GO:0032651	GO:BP	53	832	13	ENSSSCG00000001912,ENSSSCG00000004154,ENSSSCG00000005215,ENSSSCG00000009580,ENSSSCG00000009817,ENSSSCG00000016140,ENSSSCG00000017466,ENSSSCG00000020970,ENSSSCG00000024096,ENSSSCG00000032360,ENSSSCG00000035355,ENSSSCG00000035859,ENSSSCG00000037815	PML,TNFAIP3,JAK2,S1PR3,P2RX7,FZD5,CCR7,IL6,RIPK2,PANX1,F2R,WNT5A,ZC3H12A
220	interleukin-1 beta production	GO:0032611	GO:BP	53	832	13	ENSSSCG00000001912,ENSSSCG00000004154,ENSSSCG00000005215,ENSSSCG00000009580,ENSSSCG00000009817,ENSSSCG00000016140,ENSSSCG00000017466,ENSSSCG00000020970,ENSSSCG00000024096,ENSSSCG00000032360,ENSSSCG00000035355,ENSSSCG00000035859,ENSSSCG00000037815	PML,TNFAIP3,JAK2,S1PR3,P2RX7,FZD5,CCR7,IL6,RIPK2,PANX1,F2R,WNT5A,ZC3H12A
221	regulation of adaptive immune response based on somatic recombination of immune receptors built from immunoglobulin superfamily domains	GO:0002822	GO:BP	147	832	22	ENSSSCG00000001341,ENSSSCG00000001394,ENSSSCG00000001453,ENSSSCG00000003419,ENSSSCG00000004154,ENSSSCG00000004507,ENSSSCG00000005211,ENSSSCG00000006380,ENSSSCG00000009542,ENSSSCG00000009817,ENSSSCG00000010900,ENSSSCG00000011611,ENSSSCG00000011951,ENSSSCG00000015037,ENSSSCG00000016140,ENSSSCG00000017517,ENSSSCG00000017773,ENSSSCG00000024096,ENSSSCG00000025593,ENSSSCG00000037815,ENSSSCG00000038082,…	ENSSSCG00000001341,ENSSSCG00000001394,HLA-DRA,MAD2L2,TNFAIP3,SMAD7,CD274,SLAMF1,TNFSF13B,P2RX7,DENND1B,HMCES,NFKBIZ,IL18,FZD5,TBX21,SUPT6H,RIPK2,TAP2,ZC3H12A,TRAF6,IL27
222	positive regulation of cellular catabolic process	GO:0031331	GO:BP	248	832	30	ENSSSCG00000000078,ENSSSCG00000003015,ENSSSCG00000003591,ENSSSCG00000005935,ENSSSCG00000006776,ENSSSCG00000009817,ENSSSCG00000010629,ENSSSCG00000010706,ENSSSCG00000011010,ENSSSCG00000011465,ENSSSCG00000011876,ENSSSCG00000014204,ENSSSCG00000014670,ENSSSCG00000014768,ENSSSCG00000014780,ENSSSCG00000016512,ENSSSCG00000020970,ENSSSCG00000022616,ENSSSCG00000023126,ENSSSCG00000023408,ENSSSCG00000023503,…	TNRC6B,EXOSC5,PUM1,AGO2,MOV10,P2RX7,ADRA2A,SAMD4B,C9orf72,PDE12,DTX3L,DCP2,ENSSSCG00000014670,TRIM68,TRIM21,ZC3HAV1,IL6,DCP1A,TARDBP,SAMD4A,PRKCD,RIPK2,TICAM1,PIM2,SESN2,TNRC6C,TRIM38,SNX4,ZC3H12A,ENSSSCG00000039476
223	cellular response to stress	GO:0033554	GO:BP	1486	832	105	ENSSSCG00000000006,ENSSSCG00000000457,ENSSSCG00000000950,ENSSSCG00000001509,ENSSSCG00000001516,ENSSSCG00000001912,ENSSSCG00000002283,ENSSSCG00000002298,ENSSSCG00000002311,ENSSSCG00000002469,ENSSSCG00000002755,ENSSSCG00000003112,ENSSSCG00000003419,ENSSSCG00000003669,ENSSSCG00000003713,ENSSSCG00000004154,ENSSSCG00000004225,ENSSSCG00000004247,ENSSSCG00000004695,ENSSSCG00000005494,ENSSSCG00000005511,…	PPARA,USP15,E2F7,DAXX,ENSSSCG00000001516,PML,FUT8,ZFYVE26,SUSD6,OTUB2,NFAT5,BBC3,MAD2L2,MFSD2A,IMPACT,TNFAIP3,TPD52L1,ASF1A,WDR76,TNC,TRAF1,SETX,VCPIP1,RCSD1,SLAMF1,HIPK1,RBL1,PTGIS,EIF2AK2,CXCL8,UNG,AIFM2,FAS,TOPORS,HMCES,SKIL,APOD,DTX3L,MORC3,HUWE1,POLD4,CHORDC1,ASNS,PTGS2,INO80D,EPHA4,EFHD1,INSIG1,AOC1,NOS3,PTN,POT1,ENSSSCG00000017445,NPEPPS,TRIM25,IL6,CGAS,TIRAP,ETV5,PRKCD,SLC2A4,RIPK2,TIGAR,…
224	cell development	GO:0048468	GO:BP	2075	832	136	ENSSSCG00000000217,ENSSSCG00000000700,ENSSSCG00000001252,ENSSSCG00000001382,ENSSSCG00000001453,ENSSSCG00000001567,ENSSSCG00000001595,ENSSSCG00000001710,ENSSSCG00000001750,ENSSSCG00000001912,ENSSSCG00000001952,ENSSSCG00000001971,ENSSSCG00000002639,ENSSSCG00000003669,ENSSSCG00000003713,ENSSSCG00000003818,ENSSSCG00000004270,ENSSSCG00000004507,ENSSSCG00000004624,ENSSSCG00000005022,ENSSSCG00000005166,…	RACGAP1,ACRBP,UBD,DDR1,HLA-DRA,CPNE5,DAAM2,RUNX2,PAQR8,PML,NFKBIA,HECTD1,TUBB3,MFSD2A,IMPACT,DOCK7,ADGRB3,SMAD7,MAPK6,NIN,MLLT3,JAK2,RORB,TNC,SETX,ANGPT1,VPS13B,UHMK1,SLAMF1,NTRK1,CRABP2,ADAR,ACP6,PHGDH,MFSD14A,PCM1,BFSP1,ZNF335,MICALL2,EIF2AK2,ROCK2,LYAR,MYCBP2,SLITRK5,TNFSF13B,S1PR3,KIF13B,HMGB2,ACTN2,RET,ENTPD7,NEURL1,SH3PXD2A,C9orf72,NRP1,CCK,APOD,HEG1,SEMA5B,NFKBIZ,OGT,ATP11C,MARK2,MKNK2,ICA…
225	localization	GO:0051179	GO:BP	4437	832	253	ENSSSCG00000000006,ENSSSCG00000000148,ENSSSCG00000000217,ENSSSCG00000000466,ENSSSCG00000000625,ENSSSCG00000000753,ENSSSCG00000001697,ENSSSCG00000001909,ENSSSCG00000001912,ENSSSCG00000001920,ENSSSCG00000001934,ENSSSCG00000001952,ENSSSCG00000001971,ENSSSCG00000002263,ENSSSCG00000002515,ENSSSCG00000002671,ENSSSCG00000003112,ENSSSCG00000003669,ENSSSCG00000003788,ENSSSCG00000003805,ENSSSCG00000004125,…	PPARA,ENSSSCG00000000148,RACGAP1,XPOT,LRP6,WNK1,TMEM63B,STRA6,PML,HCN4,ENSSSCG00000001934,NFKBIA,HECTD1,SLCO3A1,SLC25A47,ATP2C2,BBC3,MFSD2A,PTGER3,PDE4B,STX11,TNFAIP3,SMAD7,LIPG,TTBK2,THBS1,CACHD1,ENSSSCG00000004830,NIN,LGALS3,SLC24A2,ENTREP1,NR4A3,ABCA1,CCN3,ANGPT1,VPS13B,VCPIP1,SDCBP,RCSD1,UHMK1,SLAMF1,CRABP2,SCAMP3,SLC50A1,ATP8B2,SNX27,CTSS,SLC22A15,KCNA3,SLC6A17,MFSD14A,ABCA4,ENSSSCG000000069…
226	activation of protein kinase activity	GO:0032147	GO:BP	74	832	15	ENSSSCG00000005215,ENSSSCG00000006035,ENSSSCG00000008122,ENSSSCG00000008703,ENSSSCG00000010629,ENSSSCG00000015037,ENSSSCG00000022413,ENSSSCG00000023503,ENSSSCG00000024305,ENSSSCG00000024954,ENSSSCG00000027855,ENSSSCG00000029438,ENSSSCG00000035746,ENSSSCG00000035859,ENSSSCG00000038082	JAK2,ANGPT1,ADRA2B,ADRA2C,ADRA2A,IL18,TIRAP,PRKCD,MT3,FGF1,SOCS1,SESN2,ECT2,WNT5A,TRAF6
227	antigen processing and presentation	GO:0019882	GO:BP	84	832	16	ENSSSCG00000001341,ENSSSCG00000001394,ENSSSCG00000001453,ENSSSCG00000001507,ENSSSCG00000004687,ENSSSCG00000004789,ENSSSCG00000006648,ENSSSCG00000012893,ENSSSCG00000013655,ENSSSCG00000014101,ENSSSCG00000017466,ENSSSCG00000025593,ENSSSCG00000025618,ENSSSCG00000026571,ENSSSCG00000026951,ENSSSCG00000038082	ENSSSCG00000001341,ENSSSCG00000001394,HLA-DRA,TAPBP,ENSSSCG00000004687,THBS1,CTSS,UNC93B1,ICAM1,AP3B1,CCR7,TAP2,TAP1,RAB8B,PSMB8,TRAF6
228	organic substance catabolic process	GO:1901575	GO:BP	1719	832	117	ENSSSCG00000000006,ENSSSCG00000000078,ENSSSCG00000000135,ENSSSCG00000000457,ENSSSCG00000000475,ENSSSCG00000000774,ENSSSCG00000001252,ENSSSCG00000001463,ENSSSCG00000001912,ENSSSCG00000001971,ENSSSCG00000002841,ENSSSCG00000003015,ENSSSCG00000003419,ENSSSCG00000003488,ENSSSCG00000003591,ENSSSCG00000003669,ENSSSCG00000003805,ENSSSCG00000004154,ENSSSCG00000004507,ENSSSCG00000004509,ENSSSCG00000005935,…	PPARA,TNRC6B,KCTD17,USP15,IRAK3,USP18,UBD,PSMB9,PML,HECTD1,N4BP1,EXOSC5,MAD2L2,UBR4,PUM1,MFSD2A,PDE4B,TNFAIP3,SMAD7,LIPG,AGO2,SDCBP,CTSS,MOV10,DPYD,IDO1,RNF149,TET3,USP34,NBAS,SCARB2,SPP1,MYCBP2,P2RX7,ACAD10,ENTPD7,XPNPEP1,ADRA2A,SAMD4B,TOPORS,UPF2,NGLY1,SMARCC1,PDE12,XRN1,DTX3L,ASB9,TIMP1,OGT,NAALADL1,HMGCR,ERAP1,DCP2,SLC6A7,TRIM21,ANKIB1,RNASEL,KYNU,EPHA4,NUB1,NOS3,ZC3HAV1,PGAM2,PLCD3,CNP,NPEPP…
229	negative regulation of macromolecule biosynthetic process	GO:0010558	GO:BP	1910	832	127	ENSSSCG00000000006,ENSSSCG00000000078,ENSSSCG00000000475,ENSSSCG00000000932,ENSSSCG00000000950,ENSSSCG00000001509,ENSSSCG00000001561,ENSSSCG00000001667,ENSSSCG00000001710,ENSSSCG00000001727,ENSSSCG00000001912,ENSSSCG00000001958,ENSSSCG00000002344,ENSSSCG00000002836,ENSSSCG00000002841,ENSSSCG00000003015,ENSSSCG00000003197,ENSSSCG00000003241,ENSSSCG00000003419,ENSSSCG00000003591,ENSSSCG00000003713,…	PPARA,TNRC6B,IRAK3,NTS,E2F7,DAXX,ETV7,ZNF318,RUNX2,TNFRSF21,PML,BAZ1A,RIOX1,SALL1,N4BP1,EXOSC5,MED25,ZNF614,MAD2L2,PUM1,IMPACT,CELF4,TNFAIP3,SMAD7,THBS1,CD274,TLE4,AGO2,ANGPT1,SDCBP,SLAMF1,ADAR,MOV10,IDO1,RBL1,CIITA,ENSSSCG00000008147,REL,EIF2AK2,NBAS,LYAR,CXCL8,HMBOX1,HMGB2,STN1,SAMD4B,ZNF281,ELF3,UPF2,PDE12,XRN1,SKIL,APOD,PARP14,MORC3,BCOR,ENSSSCG00000012264,ZNF555,NACC1,ZNF672,DCP2,IRF1,PIWIL4…
230	negative regulation of response to external stimulus	GO:0032102	GO:BP	308	832	34	ENSSSCG00000000006,ENSSSCG00000000396,ENSSSCG00000000457,ENSSSCG00000000475,ENSSSCG00000000774,ENSSSCG00000004154,ENSSSCG00000004789,ENSSSCG00000006002,ENSSSCG00000006543,ENSSSCG00000007463,ENSSSCG00000008729,ENSSSCG00000009469,ENSSSCG00000009886,ENSSSCG00000011102,ENSSSCG00000011874,ENSSSCG00000014780,ENSSSCG00000016230,ENSSSCG00000017416,ENSSSCG00000021383,ENSSSCG00000022011,ENSSSCG00000023503,…	PPARA,STAT2,USP15,IRAK3,USP18,TNFAIP3,THBS1,CCN3,ADAR,PTGIS,LYAR,ACOD1,TRAFD1,NRP1,PARP14,TRIM21,EPHA4,DHX58,CGAS,NMI,PRKCD,TNFAIP6,IER3,SAMHD1,FNDC4,C1QBP,WNT5A,RAB7B,FEM1A,NLRC5,FBXL2,ISG15,GPR17,OAS1
231	positive regulation of adaptive immune response based on somatic recombination of immune receptors built from immunoglobulin superfamily domains	GO:0002824	GO:BP	96	832	17	ENSSSCG00000001341,ENSSSCG00000001394,ENSSSCG00000001453,ENSSSCG00000003419,ENSSSCG00000005211,ENSSSCG00000006380,ENSSSCG00000009542,ENSSSCG00000009817,ENSSSCG00000010900,ENSSSCG00000011611,ENSSSCG00000011951,ENSSSCG00000015037,ENSSSCG00000016140,ENSSSCG00000017517,ENSSSCG00000024096,ENSSSCG00000025593,ENSSSCG00000038082	ENSSSCG00000001341,ENSSSCG00000001394,HLA-DRA,MAD2L2,CD274,SLAMF1,TNFSF13B,P2RX7,DENND1B,HMCES,NFKBIZ,IL18,FZD5,TBX21,RIPK2,TAP2,TRAF6
232	regulation of type II interferon production	GO:0032649	GO:BP	86	832	16	ENSSSCG00000003805,ENSSSCG00000005211,ENSSSCG00000005215,ENSSSCG00000006380,ENSSSCG00000015037,ENSSSCG00000016140,ENSSSCG00000017466,ENSSSCG00000017754,ENSSSCG00000024096,ENSSSCG00000032561,ENSSSCG00000034980,ENSSSCG00000035048,ENSSSCG00000035859,ENSSSCG00000037815,ENSSSCG00000039300,ENSSSCG00000040575	PDE4B,CD274,JAK2,SLAMF1,IL18,FZD5,CCR7,ENSSSCG00000017754,RIPK2,PDCD1LG2,IRF8,C1QBP,WNT5A,ZC3H12A,IL27,ISG15
233	cell adhesion	GO:0007155	GO:BP	1056	832	80	ENSSSCG00000000006,ENSSSCG00000000753,ENSSSCG00000001382,ENSSSCG00000001453,ENSSSCG00000001727,ENSSSCG00000001869,ENSSSCG00000001912,ENSSSCG00000002755,ENSSSCG00000003419,ENSSSCG00000003832,ENSSSCG00000004507,ENSSSCG00000004687,ENSSSCG00000004789,ENSSSCG00000005211,ENSSSCG00000005215,ENSSSCG00000005385,ENSSSCG00000005494,ENSSSCG00000006002,ENSSSCG00000006035,ENSSSCG00000006288,ENSSSCG00000006380,…	PPARA,WNK1,DDR1,HLA-DRA,TNFRSF21,PEAK1,PML,NFAT5,MAD2L2,TACSTD2,SMAD7,ENSSSCG00000004687,THBS1,CD274,JAK2,NR4A3,TNC,CCN3,ANGPT1,SELP,SLAMF1,VCAM1,IDO1,MICALL2,CXCL8,SPP1,FREM2,TNFSF13B,ACTN2,RET,ENSSSCG00000010278,NRP1,ENSSSCG00000011355,CLSTN2,APOD,MELTF,NFKBIZ,PLEKHA7,ICAM4,ICAM1,AP3B1,IRF1,IL18,NRCAM,TNFSF18,TENM3,PKP4,EPHA4,SNED1,MYO10,ITGA1,ITGB4,CCR7,TBX21,VMP1,ENSSSCG00000017754,ITGAE,CLDN…
234	regulation of protein kinase activity	GO:0045859	GO:BP	460	832	44	ENSSSCG00000000475,ENSSSCG00000000625,ENSSSCG00000001509,ENSSSCG00000002516,ENSSSCG00000004110,ENSSSCG00000004154,ENSSSCG00000004225,ENSSSCG00000004789,ENSSSCG00000005215,ENSSSCG00000006035,ENSSSCG00000006338,ENSSSCG00000006543,ENSSSCG00000008122,ENSSSCG00000008703,ENSSSCG00000008965,ENSSSCG00000009817,ENSSSCG00000010603,ENSSSCG00000010629,ENSSSCG00000011363,ENSSSCG00000011859,ENSSSCG00000014080,…	IRAK3,LRP6,DAXX,WARS1,TAB2,TNFAIP3,TPD52L1,THBS1,JAK2,ANGPT1,DDR2,ADAR,ADRA2B,ADRA2C,BTC,P2RX7,NEURL1,ADRA2A,PRKAR2A,HEG1,HMGCR,CHORDC1,IL18,FZD5,EPHA4,CDK12,TIRAP,PRKCD,MT3,FGF1,DVL2,SOCS1,EZH2,UVRAG,SESN2,DUSP16,EDN1,ECT2,WNT5A,GADD45A,TRAF6,BMP2,CBS,DEPTOR
235	positive regulation of cell population proliferation	GO:0008284	GO:BP	851	832	68	ENSSSCG00000000135,ENSSSCG00000001710,ENSSSCG00000001912,ENSSSCG00000004154,ENSSSCG00000004789,ENSSSCG00000005022,ENSSSCG00000005215,ENSSSCG00000005385,ENSSSCG00000005494,ENSSSCG00000005724,ENSSSCG00000006237,ENSSSCG00000006338,ENSSSCG00000006380,ENSSSCG00000006464,ENSSSCG00000006472,ENSSSCG00000006760,ENSSSCG00000006862,ENSSSCG00000007432,ENSSSCG00000008965,ENSSSCG00000009542,ENSSSCG00000009704,…	KCTD17,RUNX2,PML,TNFAIP3,THBS1,NIN,JAK2,NR4A3,TNC,SETX,SDCBP,DDR2,SLAMF1,NTRK1,CRABP2,HIPK1,VCAM1,ZNF335,BTC,TNFSF13B,HMGB2,P2RX7,RET,NEURL1,BAMBI,JCAD,NRP1,TIMP1,POLD4,CDC42EP2,MARK2,NACC1,IL18,VASH2,ZNF804A,EPHA4,PTN,LIFR,ESM1,IL31RA,CSF3,TRPV2,IL6,CDC42EP3,PDGFRB,SCG2,RIPK2,RNASEH2B,CX3CL1,TICAM1,FGF1,HIPK2,EZH2,CD248,LIMK1,IGF1R,RHOQ,MARCKSL1,PDCD1LG2,AQP1,ZNF268,F2R,EDN1,WNT5A,TRAF6,NME1,APL…
236	type II interferon production	GO:0032609	GO:BP	87	832	16	ENSSSCG00000003805,ENSSSCG00000005211,ENSSSCG00000005215,ENSSSCG00000006380,ENSSSCG00000015037,ENSSSCG00000016140,ENSSSCG00000017466,ENSSSCG00000017754,ENSSSCG00000024096,ENSSSCG00000032561,ENSSSCG00000034980,ENSSSCG00000035048,ENSSSCG00000035859,ENSSSCG00000037815,ENSSSCG00000039300,ENSSSCG00000040575	PDE4B,CD274,JAK2,SLAMF1,IL18,FZD5,CCR7,ENSSSCG00000017754,RIPK2,PDCD1LG2,IRF8,C1QBP,WNT5A,ZC3H12A,IL27,ISG15
237	regulation of alpha-beta T cell activation	GO:0046634	GO:BP	77	832	15	ENSSSCG00000001453,ENSSSCG00000004507,ENSSSCG00000005211,ENSSSCG00000005215,ENSSSCG00000011951,ENSSSCG00000014101,ENSSSCG00000014277,ENSSSCG00000015037,ENSSSCG00000017517,ENSSSCG00000017754,ENSSSCG00000024096,ENSSSCG00000027855,ENSSSCG00000030095,ENSSSCG00000037815,ENSSSCG00000039300	HLA-DRA,SMAD7,CD274,JAK2,NFKBIZ,AP3B1,IRF1,IL18,TBX21,ENSSSCG00000017754,RIPK2,SOCS1,ZBTB16,ZC3H12A,IL27
238	positive regulation of canonical NF-kappaB signal transduction	GO:0043123	GO:BP	120	832	19	ENSSSCG00000001252,ENSSSCG00000004110,ENSSSCG00000008388,ENSSSCG00000009129,ENSSSCG00000010454,ENSSSCG00000014670,ENSSSCG00000014768,ENSSSCG00000014780,ENSSSCG00000016101,ENSSSCG00000017614,ENSSSCG00000022413,ENSSSCG00000024096,ENSSSCG00000024771,ENSSSCG00000026940,ENSSSCG00000028964,ENSSSCG00000031348,ENSSSCG00000035153,ENSSSCG00000035355,ENSSSCG00000038082	UBD,TAB2,REL,TIFA,IFIT5,ENSSSCG00000014670,TRIM68,TRIM21,CFLAR,TRIM25,TIRAP,RIPK2,TICAM1,CASP10,PIM2,ALPK1,TRIM38,F2R,TRAF6
239	regulation of cell-cell adhesion	GO:0022407	GO:BP	344	832	36	ENSSSCG00000000006,ENSSSCG00000000753,ENSSSCG00000001453,ENSSSCG00000001727,ENSSSCG00000002755,ENSSSCG00000003419,ENSSSCG00000004507,ENSSSCG00000004687,ENSSSCG00000005211,ENSSSCG00000005215,ENSSSCG00000005385,ENSSSCG00000006288,ENSSSCG00000006380,ENSSSCG00000006862,ENSSSCG00000007007,ENSSSCG00000009542,ENSSSCG00000011951,ENSSSCG00000014101,ENSSSCG00000014277,ENSSSCG00000015037,ENSSSCG00000016794,…	PPARA,WNK1,HLA-DRA,TNFRSF21,NFAT5,MAD2L2,SMAD7,ENSSSCG00000004687,CD274,JAK2,NR4A3,SELP,SLAMF1,VCAM1,IDO1,TNFSF13B,NFKBIZ,AP3B1,IRF1,IL18,MYO10,CCR7,TBX21,ENSSSCG00000017754,IL6,PRKCD,RIPK2,CX3CL1,SOCS1,ZBTB16,PLA2G2D,PDCD1LG2,WNT5A,ZC3H12A,TRAF6,BMP2
240	cellular response to oxygen-containing compound	GO:1901701	GO:BP	840	832	67	ENSSSCG00000000625,ENSSSCG00000000661,ENSSSCG00000001567,ENSSSCG00000001920,ENSSSCG00000001952,ENSSSCG00000003805,ENSSSCG00000004154,ENSSSCG00000005215,ENSSSCG00000005385,ENSSSCG00000005423,ENSSSCG00000005724,ENSSSCG00000006371,ENSSSCG00000006862,ENSSSCG00000008629,ENSSSCG00000008647,ENSSSCG00000008953,ENSSSCG00000009216,ENSSSCG00000009469,ENSSSCG00000009704,ENSSSCG00000010144,ENSSSCG00000010199,…	LRP6,PHC1,CPNE5,HCN4,NFKBIA,PDE4B,TNFAIP3,JAK2,NR4A3,ABCA1,SETX,USF1,VCAM1,ROCK2,CMPK2,CXCL8,SPP1,ACOD1,HMGB2,ACTN2,RET,NEURL1,ADRA2A,SMARCC1,PLSCR4,NFKBIZ,OGT,ICAM1,HTR4,IL18,EPHA4,INSIG1,NOS3,IL6,PRKCD,SLC2A4,RIPK2,ANO1,MT3,CX3CL1,TICAM1,CHRM3,RORC,VPS54,SOCS1,SOD3,EZH2,SESN2,IGF1R,RHOQ,CASP7,CXCL10,PDCD1LG2,CXCL9,AQP1,LY6H,GPR68,GDF15,SLC12A7,IRF8,EDN1,ECT2,WNT5A,ZC3H12A,TRAF6,MAPK13,SOD2
241	regulation of leukocyte cell-cell adhesion	GO:1903037	GO:BP	262	832	30	ENSSSCG00000000006,ENSSSCG00000000753,ENSSSCG00000001453,ENSSSCG00000001727,ENSSSCG00000002755,ENSSSCG00000004507,ENSSSCG00000004687,ENSSSCG00000005211,ENSSSCG00000005215,ENSSSCG00000005385,ENSSSCG00000006288,ENSSSCG00000006380,ENSSSCG00000006862,ENSSSCG00000007007,ENSSSCG00000009542,ENSSSCG00000011951,ENSSSCG00000014101,ENSSSCG00000014277,ENSSSCG00000015037,ENSSSCG00000017466,ENSSSCG00000017517,…	PPARA,WNK1,HLA-DRA,TNFRSF21,NFAT5,SMAD7,ENSSSCG00000004687,CD274,JAK2,NR4A3,SELP,SLAMF1,VCAM1,IDO1,TNFSF13B,NFKBIZ,AP3B1,IRF1,IL18,CCR7,TBX21,ENSSSCG00000017754,IL6,RIPK2,SOCS1,ZBTB16,PLA2G2D,PDCD1LG2,ZC3H12A,TRAF6
242	positive regulation of adaptive immune response	GO:0002821	GO:BP	100	832	17	ENSSSCG00000001341,ENSSSCG00000001394,ENSSSCG00000001453,ENSSSCG00000003419,ENSSSCG00000005211,ENSSSCG00000006380,ENSSSCG00000009542,ENSSSCG00000009817,ENSSSCG00000010900,ENSSSCG00000011611,ENSSSCG00000011951,ENSSSCG00000015037,ENSSSCG00000016140,ENSSSCG00000017517,ENSSSCG00000024096,ENSSSCG00000025593,ENSSSCG00000038082	ENSSSCG00000001341,ENSSSCG00000001394,HLA-DRA,MAD2L2,CD274,SLAMF1,TNFSF13B,P2RX7,DENND1B,HMCES,NFKBIZ,IL18,FZD5,TBX21,RIPK2,TAP2,TRAF6
243	regulation of multicellular organismal development	GO:2000026	GO:BP	1001	832	76	ENSSSCG00000001453,ENSSSCG00000001595,ENSSSCG00000001710,ENSSSCG00000001727,ENSSSCG00000001912,ENSSSCG00000001952,ENSSSCG00000002516,ENSSSCG00000004270,ENSSSCG00000004507,ENSSSCG00000004789,ENSSSCG00000005022,ENSSSCG00000005935,ENSSSCG00000006338,ENSSSCG00000006464,ENSSSCG00000006472,ENSSSCG00000006994,ENSSSCG00000007027,ENSSSCG00000007432,ENSSSCG00000007463,ENSSSCG00000008397,ENSSSCG00000008629,…	HLA-DRA,DAAM2,RUNX2,TNFRSF21,PML,NFKBIA,WARS1,ADGRB3,SMAD7,THBS1,NIN,AGO2,DDR2,NTRK1,CRABP2,PCM1,SLC20A2,ZNF335,PTGIS,EFEMP1,ROCK2,CXCL8,SGMS2,SLITRK5,S1PR3,HMGB2,P2RX7,NEURL1,NRP1,CLSTN2,NFKBIZ,BCOR,ATP11C,GAL,AP3B1,IRF1,IL18,VASH2,STAT1,INO80D,NOS3,PTN,FST,CSF3,TBX21,NF1,TRPV2,IL6,TNFAIP6,RIPK2,MT3,FGF1,IL17D,HIPK2,TNFRSF11B,SOCS1,EZH2,ZBTB16,LIMK1,VGLL4,CXCL10,AQP1,GPR68,INHBA,EDN1,WNT5A,RAB7B…
244	leukocyte cell-cell adhesion	GO:0007159	GO:BP	295	832	32	ENSSSCG00000000006,ENSSSCG00000000753,ENSSSCG00000001453,ENSSSCG00000001727,ENSSSCG00000002755,ENSSSCG00000004507,ENSSSCG00000004687,ENSSSCG00000005211,ENSSSCG00000005215,ENSSSCG00000005385,ENSSSCG00000006288,ENSSSCG00000006380,ENSSSCG00000006862,ENSSSCG00000007007,ENSSSCG00000009542,ENSSSCG00000011951,ENSSSCG00000013655,ENSSSCG00000014101,ENSSSCG00000014277,ENSSSCG00000015037,ENSSSCG00000017466,…	PPARA,WNK1,HLA-DRA,TNFRSF21,NFAT5,SMAD7,ENSSSCG00000004687,CD274,JAK2,NR4A3,SELP,SLAMF1,VCAM1,IDO1,TNFSF13B,NFKBIZ,ICAM1,AP3B1,IRF1,IL18,CCR7,TBX21,ENSSSCG00000017754,IL6,STK10,RIPK2,SOCS1,ZBTB16,PLA2G2D,PDCD1LG2,ZC3H12A,TRAF6
245	regulation of cell differentiation	GO:0045595	GO:BP	1118	832	82	ENSSSCG00000000006,ENSSSCG00000000197,ENSSSCG00000001453,ENSSSCG00000001595,ENSSSCG00000001710,ENSSSCG00000001727,ENSSSCG00000001952,ENSSSCG00000002344,ENSSSCG00000003419,ENSSSCG00000003713,ENSSSCG00000003832,ENSSSCG00000004507,ENSSSCG00000005022,ENSSSCG00000005268,ENSSSCG00000006002,ENSSSCG00000006237,ENSSSCG00000006338,ENSSSCG00000006472,ENSSSCG00000006994,ENSSSCG00000007432,ENSSSCG00000008122,…	PPARA,C1QL4,HLA-DRA,DAAM2,RUNX2,TNFRSF21,NFKBIA,RIOX1,MAD2L2,IMPACT,TACSTD2,SMAD7,NIN,RORB,CCN3,SDCBP,DDR2,CRABP2,PCM1,ZNF335,ADRA2B,EFEMP1,EIF2AK2,NCOA1,ROCK2,ADRA2C,S1PR3,HMGB2,NEURL1,BAMBI,NRP1,NPHP3,SKIL,NFKBIZ,ATP11C,AP3B1,IRF1,CXCL14,IL18,FRZB,STAT1,EPHA4,INSIG1,PTN,FST,CSF3,CDK12,TBX21,SUPT6H,CYB5D2,TRPV2,IL6,TNFAIP6,RIPK2,MT3,IL17D,VASN,OLFM2,TNFRSF11B,SOCS1,EZH2,ZBTB16,LIMK1,XKR8,STK4,CX…
246	cellular response to type II interferon	GO:0071346	GO:BP	82	832	15	ENSSSCG00000011465,ENSSSCG00000011874,ENSSSCG00000012996,ENSSSCG00000014277,ENSSSCG00000016057,ENSSSCG00000022719,ENSSSCG00000024973,ENSSSCG00000027709,ENSSSCG00000032343,ENSSSCG00000034980,ENSSSCG00000035736,ENSSSCG00000035859,ENSSSCG00000036352,ENSSSCG00000039751,ENSSSCG00000040648	PDE12,PARP14,CDC42EP2,IRF1,STAT1,RAB20,GBP1,PARP9,CCL4,IRF8,ENSSSCG00000035736,WNT5A,RAB7B,NLRC5,CCL8
247	negative regulation of cell population proliferation	GO:0008285	GO:BP	588	832	51	ENSSSCG00000000197,ENSSSCG00000000950,ENSSSCG00000001382,ENSSSCG00000001727,ENSSSCG00000001912,ENSSSCG00000003197,ENSSSCG00000003832,ENSSSCG00000004154,ENSSSCG00000004507,ENSSSCG00000004789,ENSSSCG00000005211,ENSSSCG00000005215,ENSSSCG00000006002,ENSSSCG00000006464,ENSSSCG00000007007,ENSSSCG00000008496,ENSSSCG00000008499,ENSSSCG00000009229,ENSSSCG00000010603,ENSSSCG00000011102,ENSSSCG00000011831,…	C1QL4,E2F7,DDR1,TNFRSF21,PML,MED25,TACSTD2,TNFAIP3,SMAD7,THBS1,CD274,JAK2,CCN3,NTRK1,IDO1,EIF2AK2,STRN,ARHGAP24,NEURL1,NRP1,APOD,MORC3,FRZB,STAT1,FZD5,EPHA4,NOS3,PTN,ITGA1,NF1,ENSSSCG00000017754,NMI,PRKCD,MT3,PIM2,ZBTB16,INPP5J,VGLL4,ARID2,STK4,PLA2G2D,RASSF5,PDCD1LG2,H2AC8,INHBA,ZNF268,F2R,WNT5A,CTNNBIP1,BMP2,SOD2
248	regulation of protein modification by small protein conjugation or removal	GO:1903320	GO:BP	188	832	24	ENSSSCG00000001509,ENSSSCG00000002469,ENSSSCG00000002841,ENSSSCG00000003419,ENSSSCG00000004154,ENSSSCG00000004507,ENSSSCG00000006035,ENSSSCG00000007854,ENSSSCG00000009042,ENSSSCG00000009473,ENSSSCG00000011004,ENSSSCG00000011876,ENSSSCG00000012328,ENSSSCG00000012403,ENSSSCG00000014780,ENSSSCG00000022011,ENSSSCG00000024096,ENSSSCG00000024771,ENSSSCG00000027529,ENSSSCG00000030378,ENSSSCG00000031970,…	DAXX,OTUB2,N4BP1,MAD2L2,TNFAIP3,SMAD7,ANGPT1,DCUN1D3,OTUD4,MYCBP2,TOPORS,DTX3L,HUWE1,OGT,TRIM21,NMI,RIPK2,TICAM1,BIRC3,LIMK1,RASSF5,RWDD3,ZC3H12A,ISG15
249	tumor necrosis factor superfamily cytokine production	GO:0071706	GO:BP	115	832	18	ENSSSCG00000000475,ENSSSCG00000004154,ENSSSCG00000004789,ENSSSCG00000005211,ENSSSCG00000005215,ENSSSCG00000006035,ENSSSCG00000006380,ENSSSCG00000009881,ENSSSCG00000015897,ENSSSCG00000016140,ENSSSCG00000020970,ENSSSCG00000022413,ENSSSCG00000024096,ENSSSCG00000024759,ENSSSCG00000024771,ENSSSCG00000035859,ENSSSCG00000037815,ENSSSCG00000046640	IRAK3,TNFAIP3,THBS1,CD274,JAK2,ANGPT1,SLAMF1,OAS2,IFIH1,FZD5,IL6,TIRAP,RIPK2,CX3CL1,TICAM1,WNT5A,ZC3H12A,OAS1
250	regulation of tumor necrosis factor superfamily cytokine production	GO:1903555	GO:BP	115	832	18	ENSSSCG00000000475,ENSSSCG00000004154,ENSSSCG00000004789,ENSSSCG00000005211,ENSSSCG00000005215,ENSSSCG00000006035,ENSSSCG00000006380,ENSSSCG00000009881,ENSSSCG00000015897,ENSSSCG00000016140,ENSSSCG00000020970,ENSSSCG00000022413,ENSSSCG00000024096,ENSSSCG00000024759,ENSSSCG00000024771,ENSSSCG00000035859,ENSSSCG00000037815,ENSSSCG00000046640	IRAK3,TNFAIP3,THBS1,CD274,JAK2,ANGPT1,SLAMF1,OAS2,IFIH1,FZD5,IL6,TIRAP,RIPK2,CX3CL1,TICAM1,WNT5A,ZC3H12A,OAS1
251	regulation of cell activation	GO:0050865	GO:BP	462	832	43	ENSSSCG00000001453,ENSSSCG00000001727,ENSSSCG00000003419,ENSSSCG00000004154,ENSSSCG00000004507,ENSSSCG00000004687,ENSSSCG00000004789,ENSSSCG00000005055,ENSSSCG00000005211,ENSSSCG00000005215,ENSSSCG00000006288,ENSSSCG00000006380,ENSSSCG00000006862,ENSSSCG00000007007,ENSSSCG00000007432,ENSSSCG00000008820,ENSSSCG00000009542,ENSSSCG00000011611,ENSSSCG00000011951,ENSSSCG00000012713,ENSSSCG00000014101,…	HLA-DRA,TNFRSF21,MAD2L2,TNFAIP3,SMAD7,ENSSSCG00000004687,THBS1,LGALS3,CD274,JAK2,SELP,SLAMF1,VCAM1,IDO1,ZNF335,TEC,TNFSF13B,HMCES,NFKBIZ,ATP11C,AP3B1,IRF1,IL18,TNFSF18,CCR7,TBX21,ENSSSCG00000017754,SUPT6H,IL6,PLA2G4A,PRKCD,RIPK2,TICAM1,SOCS1,ZBTB16,PLA2G2D,RASSF5,PDCD1LG2,WNT5A,SNX4,ZC3H12A,TRAF6,IL27
252	cellular nitrogen compound catabolic process	GO:0044270	GO:BP	341	832	35	ENSSSCG00000000078,ENSSSCG00000003015,ENSSSCG00000003591,ENSSSCG00000003805,ENSSSCG00000005935,ENSSSCG00000006776,ENSSSCG00000006878,ENSSSCG00000007007,ENSSSCG00000008292,ENSSSCG00000008621,ENSSSCG00000010540,ENSSSCG00000010706,ENSSSCG00000011117,ENSSSCG00000011465,ENSSSCG00000011678,ENSSSCG00000014204,ENSSSCG00000015549,ENSSSCG00000015673,ENSSSCG00000016512,ENSSSCG00000017420,ENSSSCG00000020970,…	TNRC6B,EXOSC5,PUM1,PDE4B,AGO2,MOV10,DPYD,IDO1,TET3,NBAS,ENTPD7,SAMD4B,UPF2,PDE12,XRN1,DCP2,RNASEL,KYNU,ZC3HAV1,CNP,IL6,TIRAP,DCP1A,TARDBP,SAMD4A,RNASEH2B,ISG20,VPS54,SAMHD1,NUDT16,SMG1,TNRC6C,HPRT1,ZC3H12A,FASTKD5
253	heterocycle catabolic process	GO:0046700	GO:BP	341	832	35	ENSSSCG00000000078,ENSSSCG00000003015,ENSSSCG00000003591,ENSSSCG00000003805,ENSSSCG00000005935,ENSSSCG00000006776,ENSSSCG00000006878,ENSSSCG00000007007,ENSSSCG00000008292,ENSSSCG00000008621,ENSSSCG00000010540,ENSSSCG00000010706,ENSSSCG00000011117,ENSSSCG00000011465,ENSSSCG00000011678,ENSSSCG00000014204,ENSSSCG00000015549,ENSSSCG00000015673,ENSSSCG00000016512,ENSSSCG00000017420,ENSSSCG00000020970,…	TNRC6B,EXOSC5,PUM1,PDE4B,AGO2,MOV10,DPYD,IDO1,TET3,NBAS,ENTPD7,SAMD4B,UPF2,PDE12,XRN1,DCP2,RNASEL,KYNU,ZC3HAV1,CNP,IL6,TIRAP,DCP1A,TARDBP,SAMD4A,RNASEH2B,ISG20,VPS54,SAMHD1,NUDT16,SMG1,TNRC6C,HPRT1,ZC3H12A,FASTKD5
254	interleukin-1 production	GO:0032612	GO:BP	63	832	13	ENSSSCG00000001912,ENSSSCG00000004154,ENSSSCG00000005215,ENSSSCG00000009580,ENSSSCG00000009817,ENSSSCG00000016140,ENSSSCG00000017466,ENSSSCG00000020970,ENSSSCG00000024096,ENSSSCG00000032360,ENSSSCG00000035355,ENSSSCG00000035859,ENSSSCG00000037815	PML,TNFAIP3,JAK2,S1PR3,P2RX7,FZD5,CCR7,IL6,RIPK2,PANX1,F2R,WNT5A,ZC3H12A
255	regulation of interleukin-1 production	GO:0032652	GO:BP	63	832	13	ENSSSCG00000001912,ENSSSCG00000004154,ENSSSCG00000005215,ENSSSCG00000009580,ENSSSCG00000009817,ENSSSCG00000016140,ENSSSCG00000017466,ENSSSCG00000020970,ENSSSCG00000024096,ENSSSCG00000032360,ENSSSCG00000035355,ENSSSCG00000035859,ENSSSCG00000037815	PML,TNFAIP3,JAK2,S1PR3,P2RX7,FZD5,CCR7,IL6,RIPK2,PANX1,F2R,WNT5A,ZC3H12A
256	positive regulation of transferase activity	GO:0051347	GO:BP	387	832	38	ENSSSCG00000001509,ENSSSCG00000004110,ENSSSCG00000004225,ENSSSCG00000004789,ENSSSCG00000005215,ENSSSCG00000006035,ENSSSCG00000006338,ENSSSCG00000006464,ENSSSCG00000007854,ENSSSCG00000008122,ENSSSCG00000008703,ENSSSCG00000008965,ENSSSCG00000009682,ENSSSCG00000009817,ENSSSCG00000010199,ENSSSCG00000010603,ENSSSCG00000010629,ENSSSCG00000011004,ENSSSCG00000015037,ENSSSCG00000016140,ENSSSCG00000016230,…	DAXX,TAB2,TPD52L1,THBS1,JAK2,ANGPT1,DDR2,NTRK1,DCUN1D3,ADRA2B,ADRA2C,BTC,HMBOX1,P2RX7,RET,NEURL1,ADRA2A,TOPORS,IL18,FZD5,EPHA4,POT1,TIRAP,PDGFRB,PRKCD,TIGAR,MT3,FGF1,DVL2,SOCS1,RFC2,EZH2,SESN2,IGF1R,EDN1,ECT2,WNT5A,TRAF6
257	cell migration	GO:0016477	GO:BP	1147	832	83	ENSSSCG00000000753,ENSSSCG00000001382,ENSSSCG00000001595,ENSSSCG00000001869,ENSSSCG00000001912,ENSSSCG00000002283,ENSSSCG00000003435,ENSSSCG00000003805,ENSSSCG00000003818,ENSSSCG00000003832,ENSSSCG00000004154,ENSSSCG00000004551,ENSSSCG00000004718,ENSSSCG00000004789,ENSSSCG00000005055,ENSSSCG00000005385,ENSSSCG00000005935,ENSSSCG00000006002,ENSSSCG00000006035,ENSSSCG00000006237,ENSSSCG00000006288,…	WNK1,DDR1,DAAM2,PEAK1,PML,FUT8,MIIP,PDE4B,DOCK7,TACSTD2,TNFAIP3,ZNF609,TTBK2,THBS1,LGALS3,NR4A3,AGO2,CCN3,ANGPT1,SDCBP,SELP,DDR2,SLAMF1,VCAM1,PCM1,ROCK2,CXCL8,CXCL2,CXCL11,ARHGAP24,HMGB2,RET,ADRA2A,BAMBI,JCAD,NRP1,CCK,APOD,TIMP1,ICAM1,CXCL14,TNFSF18,EPHA4,NOS3,PTN,ITGA1,ITGB4,CCR7,TBX21,NF1,STK10,PDGFRB,SCG2,PRKCD,TNFAIP6,CX3CL1,FGF1,DEFB1,CD248,IGF1R,ARID2,STK4,CELSR1,SMURF2,CCL4,CXCL10,CXCL9,AQ…
258	cellular response to endogenous stimulus	GO:0071495	GO:BP	1058	832	78	ENSSSCG00000000006,ENSSSCG00000000457,ENSSSCG00000001509,ENSSSCG00000001710,ENSSSCG00000001750,ENSSSCG00000001912,ENSSSCG00000001920,ENSSSCG00000002283,ENSSSCG00000003601,ENSSSCG00000003805,ENSSSCG00000004507,ENSSSCG00000004789,ENSSSCG00000005215,ENSSSCG00000005385,ENSSSCG00000005724,ENSSSCG00000006237,ENSSSCG00000006371,ENSSSCG00000006464,ENSSSCG00000006648,ENSSSCG00000006862,ENSSSCG00000008581,…	PPARA,USP15,DAXX,RUNX2,PAQR8,PML,HCN4,FUT8,HCRTR1,PDE4B,SMAD7,THBS1,JAK2,NR4A3,SETX,SDCBP,USF1,NTRK1,CTSS,VCAM1,NCOA1,ROCK2,HTRA3,RASL11B,CXCL8,HHIP,ACTN2,NEURL1,ADRA2A,BAMBI,JCAD,NRP1,SMARCC1,SKIL,NFKBIZ,SMC1A,OGT,ICAM1,HTR4,TRIM68,ELAPOR2,EPHA4,AOC1,FST,PELP1,PDGFRB,PRKCD,NRROS,TNFAIP6,SLC2A4,RIPK2,TIGAR,MT3,FGF1,VASN,CHRM3,HIPK2,VPS54,SOCS1,EZH2,SESN2,IGF1R,RHOQ,SMURF2,CASP7,AQP1,TCF21,LY6H,PM…
259	regulation of alpha-beta T cell differentiation	GO:0046637	GO:BP	46	832	11	ENSSSCG00000001453,ENSSSCG00000004507,ENSSSCG00000011951,ENSSSCG00000014101,ENSSSCG00000015037,ENSSSCG00000017517,ENSSSCG00000024096,ENSSSCG00000027855,ENSSSCG00000030095,ENSSSCG00000037815,ENSSSCG00000039300	HLA-DRA,SMAD7,NFKBIZ,AP3B1,IL18,TBX21,RIPK2,SOCS1,ZBTB16,ZC3H12A,IL27
260	positive regulation of kinase activity	GO:0033674	GO:BP	317	832	33	ENSSSCG00000001509,ENSSSCG00000004110,ENSSSCG00000004225,ENSSSCG00000004789,ENSSSCG00000005215,ENSSSCG00000006035,ENSSSCG00000006338,ENSSSCG00000006464,ENSSSCG00000008122,ENSSSCG00000008703,ENSSSCG00000008965,ENSSSCG00000009817,ENSSSCG00000010199,ENSSSCG00000010603,ENSSSCG00000010629,ENSSSCG00000015037,ENSSSCG00000016140,ENSSSCG00000016230,ENSSSCG00000022413,ENSSSCG00000022741,ENSSSCG00000023503,…	DAXX,TAB2,TPD52L1,THBS1,JAK2,ANGPT1,DDR2,NTRK1,ADRA2B,ADRA2C,BTC,P2RX7,RET,NEURL1,ADRA2A,IL18,FZD5,EPHA4,TIRAP,PDGFRB,PRKCD,TIGAR,MT3,FGF1,DVL2,SOCS1,EZH2,SESN2,IGF1R,EDN1,ECT2,WNT5A,TRAF6
261	positive regulation of transcription by RNA polymerase II	GO:0045944	GO:BP	1025	832	76	ENSSSCG00000000006,ENSSSCG00000000396,ENSSSCG00000000625,ENSSSCG00000000950,ENSSSCG00000001710,ENSSSCG00000001952,ENSSSCG00000002002,ENSSSCG00000002755,ENSSSCG00000002836,ENSSSCG00000003197,ENSSSCG00000003989,ENSSSCG00000004551,ENSSSCG00000005215,ENSSSCG00000005268,ENSSSCG00000005385,ENSSSCG00000005724,ENSSSCG00000005935,ENSSSCG00000005983,ENSSSCG00000006371,ENSSSCG00000006698,ENSSSCG00000007243,…	PPARA,STAT2,LRP6,E2F7,RUNX2,NFKBIA,IRF9,NFAT5,SALL1,MED25,ENSSSCG00000003989,ZNF609,JAK2,RORB,NR4A3,SETX,AGO2,ATAD2,USF1,BCL9,PLAGL2,NFATC2IP,CIITA,TET3,REL,NCOA1,ENSSSCG00000009240,HMGB2,NFKB2,ELF3,SMARCC1,NFKBIZ,OGT,HCFC1,IRF7,GAL,EHF,AP3B1,IRF1,IL18,NAMPT,RNASEL,IRF2,HOXD10,STAT1,FZD5,GPBP1,CREBRF,CSF3,CDK12,TBX21,MED13,SUPT6H,PELP1,IL6,ETV5,FGF1,ELK4,DVL2,HIPK2,ZBED1,RHOQ,TCF21,BPTF,IRF8,INHB…
262	immune effector process	GO:0002252	GO:BP	469	832	43	ENSSSCG00000000475,ENSSSCG00000001341,ENSSSCG00000001394,ENSSSCG00000001453,ENSSSCG00000003419,ENSSSCG00000004507,ENSSSCG00000006035,ENSSSCG00000006380,ENSSSCG00000009720,ENSSSCG00000009817,ENSSSCG00000009938,ENSSSCG00000010540,ENSSSCG00000010900,ENSSSCG00000011611,ENSSSCG00000011951,ENSSSCG00000012853,ENSSSCG00000012893,ENSSSCG00000013418,ENSSSCG00000013655,ENSSSCG00000015037,ENSSSCG00000015487,…	IRAK3,ENSSSCG00000001341,ENSSSCG00000001394,HLA-DRA,MAD2L2,SMAD7,ANGPT1,SLAMF1,DDX60,P2RX7,UNG,ENTPD7,DENND1B,HMCES,NFKBIZ,IRF7,UNC93B1,CFD,ICAM1,IL18,TNFSF18,FZD5,DHX58,TBX21,SUPT6H,IL6,NMI,FCN2,PRKCD,RIPK2,TICAM1,RNF19B,TAP2,PANX1,HPRT1,IRF8,C1QBP,WNT5A,SNX4,ZC3H12A,TRAF6,SNAP23,IL27
263	negative regulation of molecular function	GO:0044092	GO:BP	697	832	57	ENSSSCG00000000006,ENSSSCG00000000475,ENSSSCG00000000625,ENSSSCG00000000753,ENSSSCG00000001952,ENSSSCG00000002474,ENSSSCG00000002516,ENSSSCG00000003419,ENSSSCG00000004154,ENSSSCG00000004507,ENSSSCG00000004718,ENSSSCG00000004789,ENSSSCG00000005215,ENSSSCG00000006052,ENSSSCG00000006474,ENSSSCG00000006543,ENSSSCG00000007463,ENSSSCG00000008629,ENSSSCG00000010144,ENSSSCG00000010451,ENSSSCG00000010452,…	PPARA,IRAK3,LRP6,WNK1,NFKBIA,PPP4R4,WARS1,MAD2L2,TNFAIP3,SMAD7,TTBK2,THBS1,JAK2,FZD6,NES,ADAR,PTGIS,ROCK2,ACTN2,IFIT2,IFIT1,ADRA2A,PRKAR2A,RUBCN,HEG1,DTX3L,TIMP1,HMGCR,SPINK9,TRIM21,CHORDC1,NOS3,POT1,MED13,PRKCD,MT3,SIGIRR,DHCR24,PARP9,EZH2,PIM2,LIMK1,DUSP16,ENSSSCG00000032422,AQP1,ATP2A2,IFI6,RWDD3,CTNNBIP1,GADD45A,ZC3H12A,HEYL,BMP2,NLRC5,GPR35,CYLD,DEPTOR
264	regulation of transcription by RNA polymerase II	GO:0006357	GO:BP	1956	832	126	ENSSSCG00000000006,ENSSSCG00000000396,ENSSSCG00000000625,ENSSSCG00000000950,ENSSSCG00000001561,ENSSSCG00000001710,ENSSSCG00000001952,ENSSSCG00000002002,ENSSSCG00000002755,ENSSSCG00000002836,ENSSSCG00000003197,ENSSSCG00000003241,ENSSSCG00000003419,ENSSSCG00000003670,ENSSSCG00000003713,ENSSSCG00000003989,ENSSSCG00000004138,ENSSSCG00000004507,ENSSSCG00000004551,ENSSSCG00000004859,ENSSSCG00000005215,…	PPARA,STAT2,LRP6,E2F7,ETV7,RUNX2,NFKBIA,IRF9,NFAT5,SALL1,MED25,ZNF614,MAD2L2,RLF,IMPACT,ENSSSCG00000003989,HIVEP2,SMAD7,ZNF609,ZNF516,JAK2,RORB,NR4A3,SETX,AGO2,ATAD2,ZFHX4,SDCBP,USF1,BCL9,PLAGL2,RBL1,NFATC2IP,CIITA,ENSSSCG00000008147,TET3,REL,NCOA1,LYAR,ENSSSCG00000009240,ENSSSCG00000009422,HMBOX1,HMGB2,NFKB2,ZNF281,ELF3,SMARCC1,SKIL,NFKBIZ,MORC3,BCOR,ENSSSCG00000012264,JADE3,OGT,HCFC1,IRF7,GAL,E…
265	negative regulation of protein modification process	GO:0031400	GO:BP	362	832	36	ENSSSCG00000000475,ENSSSCG00000000625,ENSSSCG00000002469,ENSSSCG00000002474,ENSSSCG00000002516,ENSSSCG00000002841,ENSSSCG00000003419,ENSSSCG00000003713,ENSSSCG00000004154,ENSSSCG00000004507,ENSSSCG00000006035,ENSSSCG00000006543,ENSSSCG00000007854,ENSSSCG00000008357,ENSSSCG00000008629,ENSSSCG00000011010,ENSSSCG00000011363,ENSSSCG00000011859,ENSSSCG00000011874,ENSSSCG00000011876,ENSSSCG00000012403,…	IRAK3,LRP6,OTUB2,PPP4R4,WARS1,N4BP1,MAD2L2,IMPACT,TNFAIP3,SMAD7,ANGPT1,ADAR,DCUN1D3,SPRED2,ROCK2,C9orf72,PRKAR2A,HEG1,PARP14,DTX3L,OGT,HMGCR,TRIM21,CHORDC1,TARDBP,PRKCD,PTPN13,SOCS1,INPP5J,LIMK1,DUSP16,GADD45A,ZC3H12A,BMP2,ISG15,DEPTOR
266	negative regulation of gene expression	GO:0010629	GO:BP	1045	832	77	ENSSSCG00000000006,ENSSSCG00000000078,ENSSSCG00000000475,ENSSSCG00000000932,ENSSSCG00000001509,ENSSSCG00000001727,ENSSSCG00000001912,ENSSSCG00000001958,ENSSSCG00000002841,ENSSSCG00000003015,ENSSSCG00000003591,ENSSSCG00000003748,ENSSSCG00000004154,ENSSSCG00000004507,ENSSSCG00000004789,ENSSSCG00000005211,ENSSSCG00000005935,ENSSSCG00000006035,ENSSSCG00000006380,ENSSSCG00000006543,ENSSSCG00000006776,…	PPARA,TNRC6B,IRAK3,NTS,DAXX,TNFRSF21,PML,BAZ1A,N4BP1,EXOSC5,PUM1,CELF4,TNFAIP3,SMAD7,THBS1,CD274,AGO2,ANGPT1,SLAMF1,ADAR,MOV10,IDO1,RBL1,REL,EIF2AK2,NBAS,CXCL8,HMGB2,SAMD4B,ZNF281,UPF2,PDE12,XRN1,APOD,PARP14,MORC3,DCP2,PIWIL4,RNASEL,ZC3HAV1,STC2,HELZ,DHX58,CCR7,TBX21,ENSSSCG00000017754,IL6,NMI,TIRAP,DCP1A,TARDBP,SAMD4A,RNASEH2B,SIGIRR,SFMBT2,CX3CL1,GBP1,LMNB2,PARP9,EZH2,SMCHD1,SESN2,ZNFX1,NUDT16,…
267	lipid transport	GO:0006869	GO:BP	348	832	35	ENSSSCG00000000148,ENSSSCG00000000625,ENSSSCG00000001909,ENSSSCG00000001952,ENSSSCG00000002263,ENSSSCG00000003669,ENSSSCG00000004509,ENSSSCG00000004789,ENSSSCG00000004830,ENSSSCG00000005423,ENSSSCG00000006071,ENSSSCG00000006472,ENSSSCG00000006550,ENSSSCG00000006890,ENSSSCG00000008051,ENSSSCG00000008812,ENSSSCG00000008980,ENSSSCG00000009216,ENSSSCG00000009817,ENSSSCG00000011690,ENSSSCG00000011831,…	ENSSSCG00000000148,LRP6,STRA6,NFKBIA,SLCO3A1,MFSD2A,LIPG,THBS1,ENSSSCG00000004830,ABCA1,VPS13B,CRABP2,ATP8B2,ABCA4,ABCA3,ATP10D,SCARB2,SPP1,P2RX7,PLSCR4,APOD,ATP11C,GAL,SLCO2B1,ACSL3,PRKCD,ATG9B,VPS54,XKR8,PLA2G2D,STARD4,INHBA,PLSCR1,SIGMAR1,ENSSSCG00000039706
268	lipid translocation	GO:0034204	GO:BP	56	832	12	ENSSSCG00000003669,ENSSSCG00000004830,ENSSSCG00000005423,ENSSSCG00000006550,ENSSSCG00000006890,ENSSSCG00000008812,ENSSSCG00000009817,ENSSSCG00000011690,ENSSSCG00000012713,ENSSSCG00000023503,ENSSSCG00000030623,ENSSSCG00000035634	MFSD2A,ENSSSCG00000004830,ABCA1,ATP8B2,ABCA4,ATP10D,P2RX7,PLSCR4,ATP11C,PRKCD,XKR8,PLSCR1
269	positive regulation of catabolic process	GO:0009896	GO:BP	410	832	39	ENSSSCG00000000078,ENSSSCG00000003015,ENSSSCG00000003591,ENSSSCG00000004154,ENSSSCG00000004507,ENSSSCG00000005935,ENSSSCG00000006776,ENSSSCG00000009817,ENSSSCG00000010629,ENSSSCG00000010706,ENSSSCG00000011010,ENSSSCG00000011465,ENSSSCG00000011876,ENSSSCG00000012132,ENSSSCG00000014204,ENSSSCG00000014670,ENSSSCG00000014768,ENSSSCG00000014780,ENSSSCG00000015314,ENSSSCG00000016438,ENSSSCG00000016512,…	TNRC6B,EXOSC5,PUM1,TNFAIP3,SMAD7,AGO2,MOV10,P2RX7,ADRA2A,SAMD4B,C9orf72,PDE12,DTX3L,ASB9,DCP2,ENSSSCG00000014670,TRIM68,TRIM21,ANKIB1,NUB1,ZC3HAV1,IL6,DCP1A,TARDBP,SAMD4A,PRKCD,RIPK2,TICAM1,RNF19B,IER3,PIM2,SESN2,VGLL4,TNRC6C,TRIM38,WNT5A,SNX4,ZC3H12A,ENSSSCG00000039476
270	interferon-beta production	GO:0032608	GO:BP	47	832	11	ENSSSCG00000008388,ENSSSCG00000009704,ENSSSCG00000009881,ENSSSCG00000012055,ENSSSCG00000012853,ENSSSCG00000014277,ENSSSCG00000015897,ENSSSCG00000022011,ENSSSCG00000024771,ENSSSCG00000040575,ENSSSCG00000046640	REL,HMGB2,OAS2,MORC3,IRF7,IRF1,IFIH1,NMI,TICAM1,ISG15,OAS1
271	regulation of interferon-beta production	GO:0032648	GO:BP	47	832	11	ENSSSCG00000008388,ENSSSCG00000009704,ENSSSCG00000009881,ENSSSCG00000012055,ENSSSCG00000012853,ENSSSCG00000014277,ENSSSCG00000015897,ENSSSCG00000022011,ENSSSCG00000024771,ENSSSCG00000040575,ENSSSCG00000046640	REL,HMGB2,OAS2,MORC3,IRF7,IRF1,IFIH1,NMI,TICAM1,ISG15,OAS1
272	leukocyte activation	GO:0045321	GO:BP	701	832	57	ENSSSCG00000001252,ENSSSCG00000001453,ENSSSCG00000001710,ENSSSCG00000001727,ENSSSCG00000001971,ENSSSCG00000003419,ENSSSCG00000004154,ENSSSCG00000004507,ENSSSCG00000004687,ENSSSCG00000004789,ENSSSCG00000005055,ENSSSCG00000005211,ENSSSCG00000005215,ENSSSCG00000006378,ENSSSCG00000006380,ENSSSCG00000006464,ENSSSCG00000006862,ENSSSCG00000007007,ENSSSCG00000007432,ENSSSCG00000008953,ENSSSCG00000009542,…	UBD,HLA-DRA,RUNX2,TNFRSF21,HECTD1,MAD2L2,TNFAIP3,SMAD7,ENSSSCG00000004687,THBS1,LGALS3,CD274,JAK2,SLAMF7,SLAMF1,NTRK1,VCAM1,IDO1,ZNF335,CXCL8,TNFSF13B,P2RX7,UNG,ENTPD7,HMCES,NFKBIZ,ATP11C,ICAM1,AP3B1,IRF1,IL18,TNFSF18,FZD5,CCR7,TBX21,ENSSSCG00000017754,SUPT6H,IL6,NMI,BATF2,PRKCD,RIPK2,TICAM1,SOCS1,EZH2,ZBTB16,PLA2G2D,RASSF5,PDCD1LG2,HPRT1,IRF8,WNT5A,SNX4,ZC3H12A,TRAF6,SNAP23,IL27
273	T cell mediated immunity	GO:0002456	GO:BP	97	832	16	ENSSSCG00000001341,ENSSSCG00000001394,ENSSSCG00000001453,ENSSSCG00000004507,ENSSSCG00000006380,ENSSSCG00000009817,ENSSSCG00000010900,ENSSSCG00000011951,ENSSSCG00000012893,ENSSSCG00000013655,ENSSSCG00000015037,ENSSSCG00000016140,ENSSSCG00000017517,ENSSSCG00000025593,ENSSSCG00000034896,ENSSSCG00000038082	ENSSSCG00000001341,ENSSSCG00000001394,HLA-DRA,SMAD7,SLAMF1,P2RX7,DENND1B,NFKBIZ,UNC93B1,ICAM1,IL18,FZD5,TBX21,TAP2,HPRT1,TRAF6
274	transport	GO:0006810	GO:BP	3713	832	213	ENSSSCG00000000148,ENSSSCG00000000217,ENSSSCG00000000466,ENSSSCG00000000625,ENSSSCG00000000753,ENSSSCG00000001697,ENSSSCG00000001909,ENSSSCG00000001912,ENSSSCG00000001920,ENSSSCG00000001934,ENSSSCG00000001952,ENSSSCG00000002263,ENSSSCG00000002515,ENSSSCG00000002671,ENSSSCG00000003112,ENSSSCG00000003669,ENSSSCG00000003788,ENSSSCG00000003805,ENSSSCG00000004125,ENSSSCG00000004509,ENSSSCG00000004789,…	ENSSSCG00000000148,RACGAP1,XPOT,LRP6,WNK1,TMEM63B,STRA6,PML,HCN4,ENSSSCG00000001934,NFKBIA,SLCO3A1,SLC25A47,ATP2C2,BBC3,MFSD2A,PTGER3,PDE4B,STX11,LIPG,THBS1,CACHD1,ENSSSCG00000004830,LGALS3,SLC24A2,ENTREP1,NR4A3,ABCA1,CCN3,ANGPT1,VPS13B,SDCBP,RCSD1,UHMK1,SLAMF1,CRABP2,SCAMP3,SLC50A1,ATP8B2,SNX27,CTSS,SLC22A15,KCNA3,SLC6A17,MFSD14A,ABCA4,ENSSSCG00000006932,CLCA1,PCM1,SLC20A2,MICALL2,ABCA3,NEURL3,E…
275	regulation of lymphocyte activation	GO:0051249	GO:BP	366	832	36	ENSSSCG00000001453,ENSSSCG00000001727,ENSSSCG00000003419,ENSSSCG00000004154,ENSSSCG00000004507,ENSSSCG00000004687,ENSSSCG00000005055,ENSSSCG00000005211,ENSSSCG00000005215,ENSSSCG00000006380,ENSSSCG00000006862,ENSSSCG00000007007,ENSSSCG00000007432,ENSSSCG00000009542,ENSSSCG00000011611,ENSSSCG00000011951,ENSSSCG00000012713,ENSSSCG00000014101,ENSSSCG00000014277,ENSSSCG00000015037,ENSSSCG00000015487,…	HLA-DRA,TNFRSF21,MAD2L2,TNFAIP3,SMAD7,ENSSSCG00000004687,LGALS3,CD274,JAK2,SLAMF1,VCAM1,IDO1,ZNF335,TNFSF13B,HMCES,NFKBIZ,ATP11C,AP3B1,IRF1,IL18,TNFSF18,CCR7,TBX21,ENSSSCG00000017754,SUPT6H,IL6,RIPK2,TICAM1,SOCS1,ZBTB16,PLA2G2D,RASSF5,PDCD1LG2,ZC3H12A,TRAF6,IL27
276	apoptotic signaling pathway	GO:0097190	GO:BP	492	832	44	ENSSSCG00000000206,ENSSSCG00000000457,ENSSSCG00000000623,ENSSSCG00000001509,ENSSSCG00000001516,ENSSSCG00000001912,ENSSSCG00000003112,ENSSSCG00000004154,ENSSSCG00000004225,ENSSSCG00000004789,ENSSSCG00000005055,ENSSSCG00000005215,ENSSSCG00000005511,ENSSSCG00000006648,ENSSSCG00000006760,ENSSSCG00000007243,ENSSSCG00000007463,ENSSSCG00000009704,ENSSSCG00000009817,ENSSSCG00000010448,ENSSSCG00000011004,…	FAIM2,USP15,BCL2L14,DAXX,ENSSSCG00000001516,PML,BBC3,TNFAIP3,TPD52L1,THBS1,LGALS3,JAK2,TRAF1,CTSS,HIPK1,PLAGL2,PTGIS,HMGB2,P2RX7,FAS,TOPORS,NRP1,SKIL,NFKBIZ,MKNK2,ICAM1,CFLAR,SCG2,PRKCD,CX3CL1,TICAM1,PMAIP1,HIPK2,CASP10,IER3,STK4,EYA4,IFI6,INHBA,WNT5A,GCLM,CYLD,SOD2,DEPTOR
277	positive regulation of mRNA catabolic process	GO:0061014	GO:BP	77	832	14	ENSSSCG00000000078,ENSSSCG00000003015,ENSSSCG00000003591,ENSSSCG00000005935,ENSSSCG00000006776,ENSSSCG00000010706,ENSSSCG00000011465,ENSSSCG00000014204,ENSSSCG00000016512,ENSSSCG00000022616,ENSSSCG00000023126,ENSSSCG00000023408,ENSSSCG00000034373,ENSSSCG00000037815	TNRC6B,EXOSC5,PUM1,AGO2,MOV10,SAMD4B,PDE12,DCP2,ZC3HAV1,DCP1A,TARDBP,SAMD4A,TNRC6C,ZC3H12A
278	phospholipid translocation	GO:0045332	GO:BP	48	832	11	ENSSSCG00000003669,ENSSSCG00000005423,ENSSSCG00000006550,ENSSSCG00000006890,ENSSSCG00000008812,ENSSSCG00000009817,ENSSSCG00000011690,ENSSSCG00000012713,ENSSSCG00000023503,ENSSSCG00000030623,ENSSSCG00000035634	MFSD2A,ABCA1,ATP8B2,ABCA4,ATP10D,P2RX7,PLSCR4,ATP11C,PRKCD,XKR8,PLSCR1
279	regulation of cellular catabolic process	GO:0031329	GO:BP	461	832	42	ENSSSCG00000000078,ENSSSCG00000003015,ENSSSCG00000003591,ENSSSCG00000003669,ENSSSCG00000005935,ENSSSCG00000006776,ENSSSCG00000008621,ENSSSCG00000009817,ENSSSCG00000010629,ENSSSCG00000010706,ENSSSCG00000011010,ENSSSCG00000011465,ENSSSCG00000011853,ENSSSCG00000011876,ENSSSCG00000012277,ENSSSCG00000014204,ENSSSCG00000014670,ENSSSCG00000014768,ENSSSCG00000014780,ENSSSCG00000015549,ENSSSCG00000016512,…	TNRC6B,EXOSC5,PUM1,MFSD2A,AGO2,MOV10,NBAS,P2RX7,ADRA2A,SAMD4B,C9orf72,PDE12,RUBCN,DTX3L,TIMP1,DCP2,ENSSSCG00000014670,TRIM68,TRIM21,RNASEL,ZC3HAV1,IL6,TIRAP,DCP1A,TARDBP,SAMD4A,PRKCD,RIPK2,TIGAR,RAB39B,DCAF12,TICAM1,PIM2,UVRAG,SESN2,TNRC6C,TRIM38,SNX4,ZC3H12A,ENSSSCG00000039476,FBXL2,FASTKD5
280	regulation of interleukin-6 production	GO:0032675	GO:BP	110	832	17	ENSSSCG00000000475,ENSSSCG00000004154,ENSSSCG00000006380,ENSSSCG00000009817,ENSSSCG00000012893,ENSSSCG00000015897,ENSSSCG00000020970,ENSSSCG00000022413,ENSSSCG00000024096,ENSSSCG00000024771,ENSSSCG00000025308,ENSSSCG00000035355,ENSSSCG00000035859,ENSSSCG00000036352,ENSSSCG00000037815,ENSSSCG00000038082,ENSSSCG00000038774	IRAK3,TNFAIP3,SLAMF1,P2RX7,UNC93B1,IFIH1,IL6,TIRAP,RIPK2,TICAM1,IL17D,F2R,WNT5A,RAB7B,ZC3H12A,TRAF6,MAPK13
281	interleukin-6 production	GO:0032635	GO:BP	110	832	17	ENSSSCG00000000475,ENSSSCG00000004154,ENSSSCG00000006380,ENSSSCG00000009817,ENSSSCG00000012893,ENSSSCG00000015897,ENSSSCG00000020970,ENSSSCG00000022413,ENSSSCG00000024096,ENSSSCG00000024771,ENSSSCG00000025308,ENSSSCG00000035355,ENSSSCG00000035859,ENSSSCG00000036352,ENSSSCG00000037815,ENSSSCG00000038082,ENSSSCG00000038774	IRAK3,TNFAIP3,SLAMF1,P2RX7,UNC93B1,IFIH1,IL6,TIRAP,RIPK2,TICAM1,IL17D,F2R,WNT5A,RAB7B,ZC3H12A,TRAF6,MAPK13
282	regulation of tumor necrosis factor production	GO:0032680	GO:BP	111	832	17	ENSSSCG00000000475,ENSSSCG00000004154,ENSSSCG00000004789,ENSSSCG00000005215,ENSSSCG00000006035,ENSSSCG00000006380,ENSSSCG00000009881,ENSSSCG00000015897,ENSSSCG00000016140,ENSSSCG00000020970,ENSSSCG00000022413,ENSSSCG00000024096,ENSSSCG00000024759,ENSSSCG00000024771,ENSSSCG00000035859,ENSSSCG00000037815,ENSSSCG00000046640	IRAK3,TNFAIP3,THBS1,JAK2,ANGPT1,SLAMF1,OAS2,IFIH1,FZD5,IL6,TIRAP,RIPK2,CX3CL1,TICAM1,WNT5A,ZC3H12A,OAS1
283	tumor necrosis factor production	GO:0032640	GO:BP	111	832	17	ENSSSCG00000000475,ENSSSCG00000004154,ENSSSCG00000004789,ENSSSCG00000005215,ENSSSCG00000006035,ENSSSCG00000006380,ENSSSCG00000009881,ENSSSCG00000015897,ENSSSCG00000016140,ENSSSCG00000020970,ENSSSCG00000022413,ENSSSCG00000024096,ENSSSCG00000024759,ENSSSCG00000024771,ENSSSCG00000035859,ENSSSCG00000037815,ENSSSCG00000046640	IRAK3,TNFAIP3,THBS1,JAK2,ANGPT1,SLAMF1,OAS2,IFIH1,FZD5,IL6,TIRAP,RIPK2,CX3CL1,TICAM1,WNT5A,ZC3H12A,OAS1
284	tube morphogenesis	GO:0035239	GO:BP	659	832	54	ENSSSCG00000000753,ENSSSCG00000000950,ENSSSCG00000001382,ENSSSCG00000001909,ENSSSCG00000001912,ENSSSCG00000001971,ENSSSCG00000002516,ENSSSCG00000003832,ENSSSCG00000004218,ENSSSCG00000004270,ENSSSCG00000004507,ENSSSCG00000004789,ENSSSCG00000005935,ENSSSCG00000006002,ENSSSCG00000006035,ENSSSCG00000006052,ENSSSCG00000007463,ENSSSCG00000008629,ENSSSCG00000008953,ENSSSCG00000009045,ENSSSCG00000010199,…	WNK1,E2F7,DDR1,STRA6,PML,HECTD1,WARS1,TACSTD2,RSPO3,ADGRB3,SMAD7,THBS1,AGO2,CCN3,ANGPT1,FZD6,PTGIS,ROCK2,CXCL8,HHIP,RET,JCAD,NRP1,NPHP3,HEG1,C2CD3,IL18,NRCAM,VASH2,STAT1,FZD5,EPHA4,NOS3,ESM1,PLCD3,NF1,SCG2,FGF1,DVL2,HIPK2,ARID2,STK4,CELSR1,CXCL10,AQP1,TCF21,EDN1,WNT5A,CTNNBIP1,ZC3H12A,SOX18,TRAF6,APLNR,BMP2
285	negative regulation of type I interferon-mediated signaling pathway	GO:0060339	GO:BP	18	832	7	ENSSSCG00000000396,ENSSSCG00000000774,ENSSSCG00000006543,ENSSSCG00000027806,ENSSSCG00000039751,ENSSSCG00000040575,ENSSSCG00000046640	STAT2,USP18,ADAR,SAMHD1,NLRC5,ISG15,OAS1
286	regulation of anatomical structure morphogenesis	GO:0022603	GO:BP	610	832	51	ENSSSCG00000000396,ENSSSCG00000001567,ENSSSCG00000001710,ENSSSCG00000001912,ENSSSCG00000002516,ENSSSCG00000003137,ENSSSCG00000003669,ENSSSCG00000003832,ENSSSCG00000004154,ENSSSCG00000004270,ENSSSCG00000004789,ENSSSCG00000005022,ENSSSCG00000005166,ENSSSCG00000005935,ENSSSCG00000006052,ENSSSCG00000006472,ENSSSCG00000007463,ENSSSCG00000008629,ENSSSCG00000008953,ENSSSCG00000009542,ENSSSCG00000009683,…	STAT2,CPNE5,RUNX2,PML,WARS1,PLEKHA4,MFSD2A,TACSTD2,TNFAIP3,ADGRB3,THBS1,NIN,MLLT3,AGO2,FZD6,CRABP2,PTGIS,ROCK2,CXCL8,TNFSF13B,KIF13B,RET,BAMBI,NRP1,HUWE1,CDC42EP2,MARK2,ARHGEF18,VASH2,STAT1,EPHA4,NOS3,MYO10,NF1,TRPV2,CDC42EP3,MT3,FGF1,BRWD3,DVL2,HIPK2,TNFRSF11B,LIMK1,RHOQ,CELSR1,CXCL10,AQP1,WNT5A,ZC3H12A,APLNR,BMP2
287	regulation of CD4-positive, alpha-beta T cell activation	GO:2000514	GO:BP	49	832	11	ENSSSCG00000001453,ENSSSCG00000004507,ENSSSCG00000005211,ENSSSCG00000011951,ENSSSCG00000015037,ENSSSCG00000017517,ENSSSCG00000017754,ENSSSCG00000024096,ENSSSCG00000027855,ENSSSCG00000037815,ENSSSCG00000039300	HLA-DRA,SMAD7,CD274,NFKBIZ,IL18,TBX21,ENSSSCG00000017754,RIPK2,SOCS1,ZC3H12A,IL27
288	positive regulation of cell differentiation	GO:0045597	GO:BP	594	832	50	ENSSSCG00000001453,ENSSSCG00000001710,ENSSSCG00000003713,ENSSSCG00000003832,ENSSSCG00000004507,ENSSSCG00000005022,ENSSSCG00000006237,ENSSSCG00000006338,ENSSSCG00000006472,ENSSSCG00000007432,ENSSSCG00000008122,ENSSSCG00000008581,ENSSSCG00000008703,ENSSSCG00000009704,ENSSSCG00000010603,ENSSSCG00000011014,ENSSSCG00000011102,ENSSSCG00000011951,ENSSSCG00000012713,ENSSSCG00000014101,ENSSSCG00000015037,…	HLA-DRA,RUNX2,IMPACT,TACSTD2,SMAD7,NIN,SDCBP,DDR2,CRABP2,ZNF335,ADRA2B,NCOA1,ADRA2C,HMGB2,NEURL1,BAMBI,NRP1,NFKBIZ,ATP11C,AP3B1,IL18,FRZB,STAT1,PTN,CSF3,CYB5D2,TRPV2,IL6,RIPK2,OLFM2,SOCS1,EZH2,ZBTB16,LIMK1,XKR8,STK4,CXCL9,GPR68,INHBA,ZNF268,EDN1,ECT2,RAB7B,CTNNBIP1,ZC3H12A,TRAF6,HEYL,BMP2,SOD2,ISG15
289	regulation of apoptotic signaling pathway	GO:2001233	GO:BP	312	832	32	ENSSSCG00000000206,ENSSSCG00000000457,ENSSSCG00000000623,ENSSSCG00000001912,ENSSSCG00000003112,ENSSSCG00000004154,ENSSSCG00000004225,ENSSSCG00000004789,ENSSSCG00000005055,ENSSSCG00000005215,ENSSSCG00000005511,ENSSSCG00000006648,ENSSSCG00000007243,ENSSSCG00000009704,ENSSSCG00000010448,ENSSSCG00000011102,ENSSSCG00000011746,ENSSSCG00000013655,ENSSSCG00000016101,ENSSSCG00000023032,ENSSSCG00000023503,…	FAIM2,USP15,BCL2L14,PML,BBC3,TNFAIP3,TPD52L1,THBS1,LGALS3,JAK2,TRAF1,CTSS,PLAGL2,HMGB2,FAS,NRP1,SKIL,ICAM1,CFLAR,SCG2,PRKCD,CX3CL1,IER3,STK4,EYA4,IFI6,INHBA,WNT5A,GCLM,CYLD,SOD2,DEPTOR
290	macromolecule localization	GO:0033036	GO:BP	2294	832	142	ENSSSCG00000000006,ENSSSCG00000000148,ENSSSCG00000000466,ENSSSCG00000000625,ENSSSCG00000000753,ENSSSCG00000001909,ENSSSCG00000001912,ENSSSCG00000001934,ENSSSCG00000001952,ENSSSCG00000001971,ENSSSCG00000002263,ENSSSCG00000002671,ENSSSCG00000003112,ENSSSCG00000003669,ENSSSCG00000004125,ENSSSCG00000004154,ENSSSCG00000004509,ENSSSCG00000004718,ENSSSCG00000004789,ENSSSCG00000004830,ENSSSCG00000005022,…	PPARA,ENSSSCG00000000148,XPOT,LRP6,WNK1,STRA6,PML,ENSSSCG00000001934,NFKBIA,HECTD1,SLCO3A1,ATP2C2,BBC3,MFSD2A,STX11,TNFAIP3,LIPG,TTBK2,THBS1,ENSSSCG00000004830,NIN,LGALS3,ABCA1,CCN3,ANGPT1,VPS13B,VCPIP1,RCSD1,UHMK1,CRABP2,SCAMP3,ATP8B2,SNX27,ABCA4,PCM1,ABCA3,NEURL3,EXOC6B,NBAS,ROCK2,ATP10D,SCARB2,SPP1,AKAP11,MYCBP2,P2RX7,ACTN2,IFIT1,ADRA2A,TOPORS,NRP1,PLSCR4,APOD,HEG1,DTX3L,MORC3,OGT,TMEM35A,ATP1…
291	aromatic compound catabolic process	GO:0019439	GO:BP	357	832	35	ENSSSCG00000000078,ENSSSCG00000003015,ENSSSCG00000003591,ENSSSCG00000003805,ENSSSCG00000005935,ENSSSCG00000006776,ENSSSCG00000006878,ENSSSCG00000007007,ENSSSCG00000008292,ENSSSCG00000008621,ENSSSCG00000010540,ENSSSCG00000010706,ENSSSCG00000011117,ENSSSCG00000011465,ENSSSCG00000011678,ENSSSCG00000014204,ENSSSCG00000015549,ENSSSCG00000015673,ENSSSCG00000016512,ENSSSCG00000017420,ENSSSCG00000020970,…	TNRC6B,EXOSC5,PUM1,PDE4B,AGO2,MOV10,DPYD,IDO1,TET3,NBAS,ENTPD7,SAMD4B,UPF2,PDE12,XRN1,DCP2,RNASEL,KYNU,ZC3HAV1,CNP,IL6,TIRAP,DCP1A,TARDBP,SAMD4A,RNASEH2B,ISG20,VPS54,SAMHD1,NUDT16,SMG1,TNRC6C,HPRT1,ZC3H12A,FASTKD5
292	organic cyclic compound catabolic process	GO:1901361	GO:BP	373	832	36	ENSSSCG00000000078,ENSSSCG00000003015,ENSSSCG00000003591,ENSSSCG00000003805,ENSSSCG00000005935,ENSSSCG00000006776,ENSSSCG00000006878,ENSSSCG00000007007,ENSSSCG00000008292,ENSSSCG00000008621,ENSSSCG00000009216,ENSSSCG00000010540,ENSSSCG00000010706,ENSSSCG00000011117,ENSSSCG00000011465,ENSSSCG00000011678,ENSSSCG00000014204,ENSSSCG00000015549,ENSSSCG00000015673,ENSSSCG00000016512,ENSSSCG00000017420,…	TNRC6B,EXOSC5,PUM1,PDE4B,AGO2,MOV10,DPYD,IDO1,TET3,NBAS,SPP1,ENTPD7,SAMD4B,UPF2,PDE12,XRN1,DCP2,RNASEL,KYNU,ZC3HAV1,CNP,IL6,TIRAP,DCP1A,TARDBP,SAMD4A,RNASEH2B,ISG20,VPS54,SAMHD1,NUDT16,SMG1,TNRC6C,HPRT1,ZC3H12A,FASTKD5
293	positive regulation of mRNA metabolic process	GO:1903313	GO:BP	101	832	16	ENSSSCG00000000078,ENSSSCG00000003015,ENSSSCG00000003591,ENSSSCG00000003748,ENSSSCG00000005935,ENSSSCG00000006776,ENSSSCG00000010706,ENSSSCG00000011465,ENSSSCG00000014204,ENSSSCG00000014794,ENSSSCG00000016512,ENSSSCG00000022616,ENSSSCG00000023126,ENSSSCG00000023408,ENSSSCG00000034373,ENSSSCG00000037815	TNRC6B,EXOSC5,PUM1,CELF4,AGO2,MOV10,SAMD4B,PDE12,DCP2,NUP98,ZC3HAV1,DCP1A,TARDBP,SAMD4A,TNRC6C,ZC3H12A
294	peptidyl-amino acid modification	GO:0018193	GO:BP	869	832	66	ENSSSCG00000000730,ENSSSCG00000000753,ENSSSCG00000001382,ENSSSCG00000001912,ENSSSCG00000003419,ENSSSCG00000003818,ENSSSCG00000004507,ENSSSCG00000004718,ENSSSCG00000005215,ENSSSCG00000006035,ENSSSCG00000006338,ENSSSCG00000006342,ENSSSCG00000006464,ENSSSCG00000006760,ENSSSCG00000007023,ENSSSCG00000007236,ENSSSCG00000007311,ENSSSCG00000008044,ENSSSCG00000008357,ENSSSCG00000008397,ENSSSCG00000008629,…	PRMT8,WNK1,DDR1,PML,MAD2L2,DOCK7,SMAD7,TTBK2,JAK2,ANGPT1,DDR2,UHMK1,NTRK1,HIPK1,ENSSSCG00000007023,TTLL9,PHF20,MLST8,SPRED2,EFEMP1,ROCK2,BTC,JADE1,ASPHD2,RET,NEURL1,ADRA2A,TOPORS,NRP1,EOGT,PARP14,MORC3,JADE3,OGT,HCFC1,MARK2,MKNK2,IL18,TNFSF18,IFIH1,EPHA4,IL31RA,CSF3,IL6,PDGFRB,PRKCD,RIPK2,DVL2,HIPK2,PARP9,SOCS1,EZH2,INPP5J,IGF1R,STK4,ZBED1,SENP3,SMG1,DESI1,ZDHHC14,WNT5A,RWDD3,GADD45A,MAPK13,ENSSS…
295	animal organ development	GO:0048513	GO:BP	2239	832	139	ENSSSCG00000000006,ENSSSCG00000000206,ENSSSCG00000000625,ENSSSCG00000000753,ENSSSCG00000000950,ENSSSCG00000001382,ENSSSCG00000001595,ENSSSCG00000001710,ENSSSCG00000001909,ENSSSCG00000001912,ENSSSCG00000001971,ENSSSCG00000002671,ENSSSCG00000002836,ENSSSCG00000003137,ENSSSCG00000003419,ENSSSCG00000003439,ENSSSCG00000003669,ENSSSCG00000003748,ENSSSCG00000003832,ENSSSCG00000004110,ENSSSCG00000004154,…	PPARA,FAIM2,LRP6,WNK1,E2F7,DDR1,DAAM2,RUNX2,STRA6,PML,HECTD1,ATP2C2,SALL1,PLEKHA4,MAD2L2,DHRS3,MFSD2A,CELF4,TACSTD2,TAB2,TNFAIP3,RSPO3,SMAD7,ZNF516,NIN,MLLT3,JAK2,RORB,TNC,CCN3,ANGPT1,FZD6,VPS13B,SDCBP,DDR2,BCL9,PHGDH,HIPK1,SLC6A17,PCM1,SLC20A2,BFSP1,ZNF335,ENSSSCG00000007678,ABCA3,EFEMP1,NCOA1,ROCK2,CXCL8,HHIP,SGMS2,SPP1,FREM2,SLITRK5,HMGB2,P2RX7,ACTN2,RET,BICC1,TLL2,NFKB2,NEURL1,ELF3,BAMBI,NRP1…
296	lipid localization	GO:0010876	GO:BP	389	832	37	ENSSSCG00000000006,ENSSSCG00000000148,ENSSSCG00000000625,ENSSSCG00000001909,ENSSSCG00000001952,ENSSSCG00000002263,ENSSSCG00000003669,ENSSSCG00000004509,ENSSSCG00000004789,ENSSSCG00000004830,ENSSSCG00000005423,ENSSSCG00000006071,ENSSSCG00000006472,ENSSSCG00000006550,ENSSSCG00000006890,ENSSSCG00000008051,ENSSSCG00000008812,ENSSSCG00000008980,ENSSSCG00000009216,ENSSSCG00000009817,ENSSSCG00000011690,…	PPARA,ENSSSCG00000000148,LRP6,STRA6,NFKBIA,SLCO3A1,MFSD2A,LIPG,THBS1,ENSSSCG00000004830,ABCA1,VPS13B,CRABP2,ATP8B2,ABCA4,ABCA3,ATP10D,SCARB2,SPP1,P2RX7,PLSCR4,APOD,ATP11C,GAL,SLCO2B1,ACSL3,PRKCD,ATG9B,VPS54,XKR8,PLA2G2D,STARD4,INHBA,PLSCR1,SIGMAR1,ZC3H12A,ENSSSCG00000039706
297	regulation of immune effector process	GO:0002697	GO:BP	286	832	30	ENSSSCG00000000475,ENSSSCG00000001341,ENSSSCG00000001394,ENSSSCG00000001453,ENSSSCG00000003419,ENSSSCG00000004507,ENSSSCG00000006035,ENSSSCG00000006380,ENSSSCG00000009720,ENSSSCG00000009817,ENSSSCG00000010900,ENSSSCG00000011611,ENSSSCG00000011951,ENSSSCG00000015037,ENSSSCG00000016140,ENSSSCG00000017416,ENSSSCG00000017517,ENSSSCG00000017773,ENSSSCG00000020970,ENSSSCG00000023333,ENSSSCG00000024096,…	IRAK3,ENSSSCG00000001341,ENSSSCG00000001394,HLA-DRA,MAD2L2,SMAD7,ANGPT1,SLAMF1,DDX60,P2RX7,DENND1B,HMCES,NFKBIZ,IL18,FZD5,DHX58,TBX21,SUPT6H,IL6,FCN2,RIPK2,TICAM1,TAP2,PANX1,C1QBP,WNT5A,SNX4,ZC3H12A,TRAF6,IL27
298	alpha-beta T cell differentiation	GO:0046632	GO:BP	91	832	15	ENSSSCG00000001453,ENSSSCG00000004507,ENSSSCG00000010540,ENSSSCG00000011951,ENSSSCG00000014101,ENSSSCG00000014277,ENSSSCG00000015037,ENSSSCG00000017517,ENSSSCG00000020970,ENSSSCG00000024096,ENSSSCG00000027855,ENSSSCG00000030095,ENSSSCG00000031106,ENSSSCG00000037815,ENSSSCG00000039300	HLA-DRA,SMAD7,ENTPD7,NFKBIZ,AP3B1,IRF1,IL18,TBX21,IL6,RIPK2,SOCS1,ZBTB16,PLA2G2D,ZC3H12A,IL27
299	angiogenesis	GO:0001525	GO:BP	377	832	36	ENSSSCG00000000753,ENSSSCG00000000950,ENSSSCG00000001912,ENSSSCG00000002516,ENSSSCG00000004218,ENSSSCG00000004270,ENSSSCG00000004789,ENSSSCG00000005935,ENSSSCG00000006002,ENSSSCG00000006035,ENSSSCG00000007463,ENSSSCG00000008629,ENSSSCG00000008953,ENSSSCG00000011020,ENSSSCG00000011102,ENSSSCG00000015037,ENSSSCG00000015445,ENSSSCG00000015589,ENSSSCG00000016057,ENSSSCG00000016140,ENSSSCG00000016450,…	WNK1,E2F7,PML,WARS1,RSPO3,ADGRB3,THBS1,AGO2,CCN3,ANGPT1,PTGIS,ROCK2,CXCL8,JCAD,NRP1,IL18,NRCAM,VASH2,STAT1,FZD5,NOS3,ESM1,PLCD3,NF1,SCG2,FGF1,HIPK2,STK4,CXCL10,AQP1,TCF21,EDN1,WNT5A,ZC3H12A,SOX18,APLNR
300	multicellular organismal-level homeostasis	GO:0048871	GO:BP	601	832	50	ENSSSCG00000000217,ENSSSCG00000000523,ENSSSCG00000003669,ENSSSCG00000003805,ENSSSCG00000004154,ENSSSCG00000004672,ENSSSCG00000004859,ENSSSCG00000005215,ENSSSCG00000006002,ENSSSCG00000006035,ENSSSCG00000006071,ENSSSCG00000006543,ENSSSCG00000006890,ENSSSCG00000008051,ENSSSCG00000008729,ENSSSCG00000009216,ENSSSCG00000009430,ENSSSCG00000009542,ENSSSCG00000009704,ENSSSCG00000009817,ENSSSCG00000011390,…	RACGAP1,BBS10,MFSD2A,PDE4B,TNFAIP3,GATM,ZNF516,JAK2,CCN3,ANGPT1,VPS13B,ADAR,ABCA4,ABCA3,LYAR,SPP1,AKAP11,TNFSF13B,HMGB2,P2RX7,IP6K1,NPHP3,SKIL,NFKBIZ,OGT,PACS1,AP3B1,HTR4,PIWIL4,IL18,STAT1,NOS3,CCR7,TRPV2,IL6,VPS54,EZH2,XKR8,ACP5,AQP1,GDF15,INHBA,F2R,TRAF6,VGF,RMI1,AQP3,ISG15,HEATR3,OAS1
301	cellular response to chemokine	GO:1990869	GO:BP	81	832	14	ENSSSCG00000000753,ENSSSCG00000005249,ENSSSCG00000008953,ENSSSCG00000008978,ENSSSCG00000017466,ENSSSCG00000024759,ENSSSCG00000032343,ENSSSCG00000032474,ENSSSCG00000032777,ENSSSCG00000035598,ENSSSCG00000035736,ENSSSCG00000037815,ENSSSCG00000040095,ENSSSCG00000040648	WNK1,ENTREP1,CXCL8,CXCL11,CCR7,CX3CL1,CCL4,CXCL10,CXCL9,EDN1,ENSSSCG00000035736,ZC3H12A,GPR35,CCL8
302	response to chemokine	GO:1990868	GO:BP	81	832	14	ENSSSCG00000000753,ENSSSCG00000005249,ENSSSCG00000008953,ENSSSCG00000008978,ENSSSCG00000017466,ENSSSCG00000024759,ENSSSCG00000032343,ENSSSCG00000032474,ENSSSCG00000032777,ENSSSCG00000035598,ENSSSCG00000035736,ENSSSCG00000037815,ENSSSCG00000040095,ENSSSCG00000040648	WNK1,ENTREP1,CXCL8,CXCL11,CCR7,CX3CL1,CCL4,CXCL10,CXCL9,EDN1,ENSSSCG00000035736,ZC3H12A,GPR35,CCL8
303	negative regulation of cell adhesion	GO:0007162	GO:BP	204	832	24	ENSSSCG00000000006,ENSSSCG00000000753,ENSSSCG00000001727,ENSSSCG00000003419,ENSSSCG00000003832,ENSSSCG00000004507,ENSSSCG00000004789,ENSSSCG00000005211,ENSSSCG00000006035,ENSSSCG00000007007,ENSSSCG00000011831,ENSSSCG00000011837,ENSSSCG00000014277,ENSSSCG00000016230,ENSSSCG00000017517,ENSSSCG00000017754,ENSSSCG00000023503,ENSSSCG00000024973,ENSSSCG00000027855,ENSSSCG00000031106,ENSSSCG00000032561,…	PPARA,WNK1,TNFRSF21,MAD2L2,TACSTD2,SMAD7,THBS1,CD274,ANGPT1,IDO1,APOD,MELTF,IRF1,EPHA4,TBX21,ENSSSCG00000017754,PRKCD,GBP1,SOCS1,PLA2G2D,PDCD1LG2,ZC3H12A,RND1,BMP2
304	positive regulation of T cell mediated immunity	GO:0002711	GO:BP	51	832	11	ENSSSCG00000001341,ENSSSCG00000001394,ENSSSCG00000001453,ENSSSCG00000006380,ENSSSCG00000009817,ENSSSCG00000010900,ENSSSCG00000015037,ENSSSCG00000016140,ENSSSCG00000017517,ENSSSCG00000025593,ENSSSCG00000038082	ENSSSCG00000001341,ENSSSCG00000001394,HLA-DRA,SLAMF1,P2RX7,DENND1B,IL18,FZD5,TBX21,TAP2,TRAF6
305	alpha-beta T cell activation	GO:0046631	GO:BP	127	832	18	ENSSSCG00000001453,ENSSSCG00000004507,ENSSSCG00000005211,ENSSSCG00000005215,ENSSSCG00000010540,ENSSSCG00000011951,ENSSSCG00000014101,ENSSSCG00000014277,ENSSSCG00000015037,ENSSSCG00000017517,ENSSSCG00000017754,ENSSSCG00000020970,ENSSSCG00000024096,ENSSSCG00000027855,ENSSSCG00000030095,ENSSSCG00000031106,ENSSSCG00000037815,ENSSSCG00000039300	HLA-DRA,SMAD7,CD274,JAK2,ENTPD7,NFKBIZ,AP3B1,IRF1,IL18,TBX21,ENSSSCG00000017754,IL6,RIPK2,SOCS1,ZBTB16,PLA2G2D,ZC3H12A,IL27
306	regulation of T-helper cell differentiation	GO:0045622	GO:BP	26	832	8	ENSSSCG00000001453,ENSSSCG00000004507,ENSSSCG00000011951,ENSSSCG00000015037,ENSSSCG00000017517,ENSSSCG00000024096,ENSSSCG00000037815,ENSSSCG00000039300	HLA-DRA,SMAD7,NFKBIZ,IL18,TBX21,RIPK2,ZC3H12A,IL27
307	regulation of body fluid levels	GO:0050878	GO:BP	218	832	25	ENSSSCG00000000753,ENSSSCG00000004789,ENSSSCG00000005215,ENSSSCG00000006052,ENSSSCG00000006288,ENSSSCG00000006289,ENSSSCG00000008122,ENSSSCG00000008703,ENSSSCG00000008820,ENSSSCG00000009430,ENSSSCG00000010603,ENSSSCG00000010629,ENSSSCG00000011859,ENSSSCG00000014101,ENSSSCG00000014428,ENSSSCG00000020970,ENSSSCG00000023351,ENSSSCG00000023503,ENSSSCG00000024158,ENSSSCG00000026176,ENSSSCG00000033190,…	WNK1,THBS1,JAK2,FZD6,SELP,F5,ADRA2B,ADRA2C,TEC,AKAP11,NEURL1,ADRA2A,HEG1,AP3B1,HTR4,IL6,PLA2G4A,PRKCD,ANO1,CHRM3,AQP1,F2R,EDN1,NME1,AQP3
308	regulation of post-translational protein modification	GO:1901873	GO:BP	246	832	27	ENSSSCG00000001509,ENSSSCG00000002469,ENSSSCG00000002841,ENSSSCG00000003419,ENSSSCG00000004154,ENSSSCG00000004507,ENSSSCG00000006035,ENSSSCG00000007311,ENSSSCG00000007854,ENSSSCG00000009042,ENSSSCG00000009473,ENSSSCG00000011004,ENSSSCG00000011876,ENSSSCG00000012328,ENSSSCG00000012403,ENSSSCG00000012793,ENSSSCG00000014780,ENSSSCG00000022011,ENSSSCG00000024096,ENSSSCG00000024771,ENSSSCG00000027529,…	DAXX,OTUB2,N4BP1,MAD2L2,TNFAIP3,SMAD7,ANGPT1,PHF20,DCUN1D3,OTUD4,MYCBP2,TOPORS,DTX3L,HUWE1,OGT,HCFC1,TRIM21,NMI,RIPK2,TICAM1,BIRC3,LIMK1,RASSF5,RWDD3,ZC3H12A,APLNR,ISG15
309	nucleobase-containing compound catabolic process	GO:0034655	GO:BP	319	832	32	ENSSSCG00000000078,ENSSSCG00000003015,ENSSSCG00000003591,ENSSSCG00000003805,ENSSSCG00000005935,ENSSSCG00000006776,ENSSSCG00000006878,ENSSSCG00000008621,ENSSSCG00000010540,ENSSSCG00000010706,ENSSSCG00000011117,ENSSSCG00000011465,ENSSSCG00000011678,ENSSSCG00000014204,ENSSSCG00000015549,ENSSSCG00000016512,ENSSSCG00000017420,ENSSSCG00000020970,ENSSSCG00000022413,ENSSSCG00000022616,ENSSSCG00000023126,…	TNRC6B,EXOSC5,PUM1,PDE4B,AGO2,MOV10,DPYD,NBAS,ENTPD7,SAMD4B,UPF2,PDE12,XRN1,DCP2,RNASEL,ZC3HAV1,CNP,IL6,TIRAP,DCP1A,TARDBP,SAMD4A,RNASEH2B,ISG20,VPS54,SAMHD1,NUDT16,SMG1,TNRC6C,HPRT1,ZC3H12A,FASTKD5
310	positive regulation of interleukin-6 production	GO:0032755	GO:BP	71	832	13	ENSSSCG00000009817,ENSSSCG00000012893,ENSSSCG00000015897,ENSSSCG00000020970,ENSSSCG00000022413,ENSSSCG00000024096,ENSSSCG00000024771,ENSSSCG00000025308,ENSSSCG00000035355,ENSSSCG00000035859,ENSSSCG00000036352,ENSSSCG00000038082,ENSSSCG00000038774	P2RX7,UNC93B1,IFIH1,IL6,TIRAP,RIPK2,TICAM1,IL17D,F2R,WNT5A,RAB7B,TRAF6,MAPK13
311	cellular response to chemical stress	GO:0062197	GO:BP	205	832	24	ENSSSCG00000000457,ENSSSCG00000002283,ENSSSCG00000004154,ENSSSCG00000005724,ENSSSCG00000006307,ENSSSCG00000010258,ENSSSCG00000010448,ENSSSCG00000016290,ENSSSCG00000016450,ENSSSCG00000020970,ENSSSCG00000023229,ENSSSCG00000023503,ENSSSCG00000023915,ENSSSCG00000024305,ENSSSCG00000028814,ENSSSCG00000028840,ENSSSCG00000029438,ENSSSCG00000033190,ENSSSCG00000034386,ENSSSCG00000035598,ENSSSCG00000035746,…	USP15,FUT8,TNFAIP3,SETX,RCSD1,AIFM2,FAS,EFHD1,NOS3,IL6,ETV5,PRKCD,SLC2A4,MT3,SOD3,EZH2,SESN2,AQP1,ATP2A2,EDN1,ECT2,ZC3H12A,MAPK13,SOD2
312	regulation of membrane lipid distribution	GO:0097035	GO:BP	61	832	12	ENSSSCG00000003669,ENSSSCG00000004830,ENSSSCG00000005423,ENSSSCG00000006550,ENSSSCG00000006890,ENSSSCG00000008812,ENSSSCG00000009817,ENSSSCG00000011690,ENSSSCG00000012713,ENSSSCG00000023503,ENSSSCG00000030623,ENSSSCG00000035634	MFSD2A,ENSSSCG00000004830,ABCA1,ATP8B2,ABCA4,ATP10D,P2RX7,PLSCR4,ATP11C,PRKCD,XKR8,PLSCR1
313	regulation of CD4-positive, alpha-beta T cell differentiation	GO:0043370	GO:BP	34	832	9	ENSSSCG00000001453,ENSSSCG00000004507,ENSSSCG00000011951,ENSSSCG00000015037,ENSSSCG00000017517,ENSSSCG00000024096,ENSSSCG00000027855,ENSSSCG00000037815,ENSSSCG00000039300	HLA-DRA,SMAD7,NFKBIZ,IL18,TBX21,RIPK2,SOCS1,ZC3H12A,IL27
314	positive regulation of monoatomic ion transport	GO:0043270	GO:BP	128	832	18	ENSSSCG00000000753,ENSSSCG00000002671,ENSSSCG00000005055,ENSSSCG00000006648,ENSSSCG00000008978,ENSSSCG00000009817,ENSSSCG00000010144,ENSSSCG00000010629,ENSSSCG00000012883,ENSSSCG00000017668,ENSSSCG00000018032,ENSSSCG00000024022,ENSSSCG00000024759,ENSSSCG00000032474,ENSSSCG00000032777,ENSSSCG00000035355,ENSSSCG00000035598,ENSSSCG00000038869	WNK1,ATP2C2,LGALS3,CTSS,CXCL11,P2RX7,ACTN2,ADRA2A,GAL,VMP1,TRPV2,TRPC6,CX3CL1,CXCL10,CXCL9,F2R,EDN1,APLNR
315	regulation of type I interferon production	GO:0032479	GO:BP	93	832	15	ENSSSCG00000008388,ENSSSCG00000009704,ENSSSCG00000009881,ENSSSCG00000012055,ENSSSCG00000012853,ENSSSCG00000014277,ENSSSCG00000015897,ENSSSCG00000016057,ENSSSCG00000017416,ENSSSCG00000021383,ENSSSCG00000022011,ENSSSCG00000024771,ENSSSCG00000034980,ENSSSCG00000040575,ENSSSCG00000046640	REL,HMGB2,OAS2,MORC3,IRF7,IRF1,IFIH1,STAT1,DHX58,CGAS,NMI,TICAM1,IRF8,ISG15,OAS1
316	regulation of leukocyte activation	GO:0002694	GO:BP	428	832	39	ENSSSCG00000001453,ENSSSCG00000001727,ENSSSCG00000003419,ENSSSCG00000004154,ENSSSCG00000004507,ENSSSCG00000004687,ENSSSCG00000004789,ENSSSCG00000005055,ENSSSCG00000005211,ENSSSCG00000005215,ENSSSCG00000006380,ENSSSCG00000006862,ENSSSCG00000007007,ENSSSCG00000007432,ENSSSCG00000009542,ENSSSCG00000011611,ENSSSCG00000011951,ENSSSCG00000012713,ENSSSCG00000014101,ENSSSCG00000014277,ENSSSCG00000015037,…	HLA-DRA,TNFRSF21,MAD2L2,TNFAIP3,SMAD7,ENSSSCG00000004687,THBS1,LGALS3,CD274,JAK2,SLAMF1,VCAM1,IDO1,ZNF335,TNFSF13B,HMCES,NFKBIZ,ATP11C,AP3B1,IRF1,IL18,TNFSF18,CCR7,TBX21,ENSSSCG00000017754,SUPT6H,IL6,RIPK2,TICAM1,SOCS1,ZBTB16,PLA2G2D,RASSF5,PDCD1LG2,WNT5A,SNX4,ZC3H12A,TRAF6,IL27
317	myeloid cell differentiation	GO:0030099	GO:BP	336	832	33	ENSSSCG00000000217,ENSSSCG00000001252,ENSSSCG00000001912,ENSSSCG00000001952,ENSSSCG00000005215,ENSSSCG00000006543,ENSSSCG00000008729,ENSSSCG00000009704,ENSSSCG00000010604,ENSSSCG00000014101,ENSSSCG00000016057,ENSSSCG00000016915,ENSSSCG00000017466,ENSSSCG00000017488,ENSSSCG00000021475,ENSSSCG00000023178,ENSSSCG00000023527,ENSSSCG00000023716,ENSSSCG00000026940,ENSSSCG00000027509,ENSSSCG00000027762,…	RACGAP1,UBD,PML,NFKBIA,JAK2,ADAR,LYAR,HMGB2,SH3PXD2A,AP3B1,STAT1,IL31RA,CCR7,CSF3,SLC4A2,BATF2,NRROS,TNFAIP6,CASP10,VPS54,TNFRSF11B,SOCS1,ZBTB16,GPR68,IRF8,INHBA,RAB7B,CTNNBIP1,ATP6AP1,TRAF6,BMP2,ISG15,HEATR3
318	lymphocyte activation	GO:0046649	GO:BP	591	832	49	ENSSSCG00000001453,ENSSSCG00000001710,ENSSSCG00000001727,ENSSSCG00000001971,ENSSSCG00000003419,ENSSSCG00000004154,ENSSSCG00000004507,ENSSSCG00000004687,ENSSSCG00000005055,ENSSSCG00000005211,ENSSSCG00000005215,ENSSSCG00000006378,ENSSSCG00000006380,ENSSSCG00000006464,ENSSSCG00000006862,ENSSSCG00000007007,ENSSSCG00000007432,ENSSSCG00000009542,ENSSSCG00000009817,ENSSSCG00000009938,ENSSSCG00000010540,…	HLA-DRA,RUNX2,TNFRSF21,HECTD1,MAD2L2,TNFAIP3,SMAD7,ENSSSCG00000004687,LGALS3,CD274,JAK2,SLAMF7,SLAMF1,NTRK1,VCAM1,IDO1,ZNF335,TNFSF13B,P2RX7,UNG,ENTPD7,HMCES,NFKBIZ,ATP11C,ICAM1,AP3B1,IRF1,IL18,TNFSF18,FZD5,CCR7,TBX21,ENSSSCG00000017754,SUPT6H,IL6,PRKCD,RIPK2,TICAM1,SOCS1,EZH2,ZBTB16,PLA2G2D,RASSF5,PDCD1LG2,HPRT1,IRF8,ZC3H12A,TRAF6,IL27
319	type I interferon production	GO:0032606	GO:BP	94	832	15	ENSSSCG00000008388,ENSSSCG00000009704,ENSSSCG00000009881,ENSSSCG00000012055,ENSSSCG00000012853,ENSSSCG00000014277,ENSSSCG00000015897,ENSSSCG00000016057,ENSSSCG00000017416,ENSSSCG00000021383,ENSSSCG00000022011,ENSSSCG00000024771,ENSSSCG00000034980,ENSSSCG00000040575,ENSSSCG00000046640	REL,HMGB2,OAS2,MORC3,IRF7,IRF1,IFIH1,STAT1,DHX58,CGAS,NMI,TICAM1,IRF8,ISG15,OAS1
320	organonitrogen compound catabolic process	GO:1901565	GO:BP	1101	832	78	ENSSSCG00000000135,ENSSSCG00000000457,ENSSSCG00000000475,ENSSSCG00000000774,ENSSSCG00000001252,ENSSSCG00000001463,ENSSSCG00000001912,ENSSSCG00000001971,ENSSSCG00000002841,ENSSSCG00000003419,ENSSSCG00000003488,ENSSSCG00000003805,ENSSSCG00000004154,ENSSSCG00000004507,ENSSSCG00000006237,ENSSSCG00000006648,ENSSSCG00000006878,ENSSSCG00000007007,ENSSSCG00000008168,ENSSSCG00000008292,ENSSSCG00000008382,…	KCTD17,USP15,IRAK3,USP18,UBD,PSMB9,PML,HECTD1,N4BP1,MAD2L2,UBR4,PDE4B,TNFAIP3,SMAD7,SDCBP,CTSS,DPYD,IDO1,RNF149,TET3,USP34,MYCBP2,P2RX7,ENTPD7,XPNPEP1,ADRA2A,TOPORS,NGLY1,SMARCC1,DTX3L,ASB9,TIMP1,OGT,NAALADL1,HMGCR,ERAP1,SLC6A7,TRIM21,ANKIB1,KYNU,EPHA4,NUB1,NOS3,NPEPPS,TBX21,TRIM25,HERC6,PLA2G4A,UBE2L6,PRKCD,DCAF12,RNF19B,HIPK2,PSMB8,VPS54,IER3,SAMHD1,TMEM9,HERC5,VGLL4,SMURF2,CASP7,CHMP7,ENSSSCG0…
321	negative regulation of transmembrane receptor protein serine/threonine kinase signaling pathway	GO:0090101	GO:BP	106	832	16	ENSSSCG00000000006,ENSSSCG00000004507,ENSSSCG00000006002,ENSSSCG00000008723,ENSSSCG00000008835,ENSSSCG00000011014,ENSSSCG00000011746,ENSSSCG00000016892,ENSSSCG00000023527,ENSSSCG00000023716,ENSSSCG00000025561,ENSSSCG00000026733,ENSSSCG00000032176,ENSSSCG00000034259,ENSSSCG00000035859,ENSSSCG00000039442	PPARA,SMAD7,CCN3,HTRA3,RASL11B,BAMBI,SKIL,FST,NRROS,TNFAIP6,VASN,HIPK2,SMURF2,PMEPA1,WNT5A,BMP2
322	transcription by RNA polymerase II	GO:0006366	GO:BP	2031	832	127	ENSSSCG00000000006,ENSSSCG00000000396,ENSSSCG00000000457,ENSSSCG00000000625,ENSSSCG00000000950,ENSSSCG00000001561,ENSSSCG00000001710,ENSSSCG00000001952,ENSSSCG00000002002,ENSSSCG00000002755,ENSSSCG00000002836,ENSSSCG00000003197,ENSSSCG00000003241,ENSSSCG00000003419,ENSSSCG00000003670,ENSSSCG00000003713,ENSSSCG00000003989,ENSSSCG00000004138,ENSSSCG00000004507,ENSSSCG00000004551,ENSSSCG00000004859,…	PPARA,STAT2,USP15,LRP6,E2F7,ETV7,RUNX2,NFKBIA,IRF9,NFAT5,SALL1,MED25,ZNF614,MAD2L2,RLF,IMPACT,ENSSSCG00000003989,HIVEP2,SMAD7,ZNF609,ZNF516,JAK2,RORB,NR4A3,SETX,AGO2,ATAD2,ZFHX4,SDCBP,USF1,BCL9,PLAGL2,RBL1,NFATC2IP,CIITA,ENSSSCG00000008147,TET3,REL,NCOA1,LYAR,ENSSSCG00000009240,ENSSSCG00000009422,HMBOX1,HMGB2,NFKB2,ZNF281,ELF3,SMARCC1,SKIL,NFKBIZ,MORC3,BCOR,ENSSSCG00000012264,JADE3,OGT,HCFC1,IRF7…
323	activation of protein kinase B activity	GO:0032148	GO:BP	20	832	7	ENSSSCG00000008122,ENSSSCG00000008703,ENSSSCG00000010629,ENSSSCG00000015037,ENSSSCG00000024305,ENSSSCG00000024954,ENSSSCG00000035859	ADRA2B,ADRA2C,ADRA2A,IL18,MT3,FGF1,WNT5A
324	mRNA destabilization	GO:0061157	GO:BP	73	832	13	ENSSSCG00000000078,ENSSSCG00000003015,ENSSSCG00000003591,ENSSSCG00000005935,ENSSSCG00000006776,ENSSSCG00000010706,ENSSSCG00000011465,ENSSSCG00000014204,ENSSSCG00000022616,ENSSSCG00000023126,ENSSSCG00000023408,ENSSSCG00000034373,ENSSSCG00000037815	TNRC6B,EXOSC5,PUM1,AGO2,MOV10,SAMD4B,PDE12,DCP2,DCP1A,TARDBP,SAMD4A,TNRC6C,ZC3H12A
325	chemokine-mediated signaling pathway	GO:0070098	GO:BP	73	832	13	ENSSSCG00000000753,ENSSSCG00000005249,ENSSSCG00000008953,ENSSSCG00000008978,ENSSSCG00000017466,ENSSSCG00000024759,ENSSSCG00000032343,ENSSSCG00000032474,ENSSSCG00000032777,ENSSSCG00000035598,ENSSSCG00000035736,ENSSSCG00000040095,ENSSSCG00000040648	WNK1,ENTREP1,CXCL8,CXCL11,CCR7,CX3CL1,CCL4,CXCL10,CXCL9,EDN1,ENSSSCG00000035736,GPR35,CCL8
326	CD4-positive, alpha-beta T cell activation	GO:0035710	GO:BP	84	832	14	ENSSSCG00000001453,ENSSSCG00000004507,ENSSSCG00000005211,ENSSSCG00000010540,ENSSSCG00000011951,ENSSSCG00000015037,ENSSSCG00000017517,ENSSSCG00000017754,ENSSSCG00000020970,ENSSSCG00000024096,ENSSSCG00000027855,ENSSSCG00000031106,ENSSSCG00000037815,ENSSSCG00000039300	HLA-DRA,SMAD7,CD274,ENTPD7,NFKBIZ,IL18,TBX21,ENSSSCG00000017754,IL6,RIPK2,SOCS1,PLA2G2D,ZC3H12A,IL27
327	anatomical structure formation involved in morphogenesis	GO:0048646	GO:BP	889	832	66	ENSSSCG00000000006,ENSSSCG00000000206,ENSSSCG00000000625,ENSSSCG00000000700,ENSSSCG00000000753,ENSSSCG00000000950,ENSSSCG00000001909,ENSSSCG00000001912,ENSSSCG00000001971,ENSSSCG00000002516,ENSSSCG00000004154,ENSSSCG00000004218,ENSSSCG00000004270,ENSSSCG00000004789,ENSSSCG00000005935,ENSSSCG00000006002,ENSSSCG00000006035,ENSSSCG00000006052,ENSSSCG00000006071,ENSSSCG00000006760,ENSSSCG00000006870,…	PPARA,FAIM2,LRP6,ACRBP,WNK1,E2F7,STRA6,PML,HECTD1,WARS1,TNFAIP3,RSPO3,ADGRB3,THBS1,AGO2,CCN3,ANGPT1,FZD6,VPS13B,HIPK1,MFSD14A,PTGIS,ROCK2,CXCL8,TNFSF13B,ACTN2,RET,NFKB2,SH3PXD2A,JCAD,NRP1,SKIL,IL18,NRCAM,VASH2,STAT1,FZD5,NOS3,ESM1,ITGB4,FAM20A,PLCD3,NF1,SUPT6H,SCG2,FGF1,DVL2,HIPK2,FHOD3,STK4,CELSR1,CXCL10,CXCL9,AQP1,TCF21,GDF15,DOCK1,INHBA,EDN1,WNT5A,ZC3H12A,SOX18,TRAF6,APLNR,HEYL,BMP2
328	positive regulation of protein kinase activity	GO:0045860	GO:BP	266	832	28	ENSSSCG00000001509,ENSSSCG00000004110,ENSSSCG00000004225,ENSSSCG00000004789,ENSSSCG00000005215,ENSSSCG00000006035,ENSSSCG00000006338,ENSSSCG00000008122,ENSSSCG00000008703,ENSSSCG00000008965,ENSSSCG00000009817,ENSSSCG00000010603,ENSSSCG00000010629,ENSSSCG00000015037,ENSSSCG00000016140,ENSSSCG00000016230,ENSSSCG00000022413,ENSSSCG00000023503,ENSSSCG00000024305,ENSSSCG00000024954,ENSSSCG00000025689,…	DAXX,TAB2,TPD52L1,THBS1,JAK2,ANGPT1,DDR2,ADRA2B,ADRA2C,BTC,P2RX7,NEURL1,ADRA2A,IL18,FZD5,EPHA4,TIRAP,PRKCD,MT3,FGF1,DVL2,SOCS1,EZH2,SESN2,EDN1,ECT2,WNT5A,TRAF6
329	interleukin-12 production	GO:0032615	GO:BP	44	832	10	ENSSSCG00000000475,ENSSSCG00000004789,ENSSSCG00000006380,ENSSSCG00000007007,ENSSSCG00000012893,ENSSSCG00000014277,ENSSSCG00000017466,ENSSSCG00000034980,ENSSSCG00000035048,ENSSSCG00000038082	IRAK3,THBS1,SLAMF1,IDO1,UNC93B1,IRF1,CCR7,IRF8,C1QBP,TRAF6
330	regulation of interleukin-12 production	GO:0032655	GO:BP	44	832	10	ENSSSCG00000000475,ENSSSCG00000004789,ENSSSCG00000006380,ENSSSCG00000007007,ENSSSCG00000012893,ENSSSCG00000014277,ENSSSCG00000017466,ENSSSCG00000034980,ENSSSCG00000035048,ENSSSCG00000038082	IRAK3,THBS1,SLAMF1,IDO1,UNC93B1,IRF1,CCR7,IRF8,C1QBP,TRAF6
331	enzyme-linked receptor protein signaling pathway	GO:0007167	GO:BP	767	832	59	ENSSSCG00000000006,ENSSSCG00000000457,ENSSSCG00000001382,ENSSSCG00000001710,ENSSSCG00000001912,ENSSSCG00000002283,ENSSSCG00000003431,ENSSSCG00000004507,ENSSSCG00000004789,ENSSSCG00000005215,ENSSSCG00000005385,ENSSSCG00000005724,ENSSSCG00000006002,ENSSSCG00000006035,ENSSSCG00000006237,ENSSSCG00000006338,ENSSSCG00000006464,ENSSSCG00000008397,ENSSSCG00000008723,ENSSSCG00000008835,ENSSSCG00000008965,…	PPARA,USP15,DDR1,RUNX2,PML,FUT8,NPPB,SMAD7,THBS1,JAK2,NR4A3,SETX,CCN3,ANGPT1,SDCBP,DDR2,NTRK1,EFEMP1,HTRA3,RASL11B,BTC,HHIP,RET,BLNK,BAMBI,JCAD,NRP1,SMARCC1,SKIL,APOD,OGT,ELAPOR2,EPHA4,LIFR,ITGA1,FST,ESM1,ANKS1B,PDGFRB,RHBDF2,PRKCD,NRROS,TNFAIP6,MT3,FGF1,VASN,HIPK2,SOCS1,IGF1R,RHOQ,SMURF2,PMEPA1,GDF15,IFI6,INHBA,WNT5A,PTP4A3,BMP2,FLRT2
332	positive regulation of immune effector process	GO:0002699	GO:BP	197	832	23	ENSSSCG00000001341,ENSSSCG00000001394,ENSSSCG00000001453,ENSSSCG00000003419,ENSSSCG00000006380,ENSSSCG00000009720,ENSSSCG00000009817,ENSSSCG00000010900,ENSSSCG00000011611,ENSSSCG00000011951,ENSSSCG00000015037,ENSSSCG00000016140,ENSSSCG00000017416,ENSSSCG00000017517,ENSSSCG00000020970,ENSSSCG00000023333,ENSSSCG00000024096,ENSSSCG00000024771,ENSSSCG00000025593,ENSSSCG00000032360,ENSSSCG00000035859,…	ENSSSCG00000001341,ENSSSCG00000001394,HLA-DRA,MAD2L2,SLAMF1,DDX60,P2RX7,DENND1B,HMCES,NFKBIZ,IL18,FZD5,DHX58,TBX21,IL6,FCN2,RIPK2,TICAM1,TAP2,PANX1,WNT5A,SNX4,TRAF6
333	regulation of hydrolase activity	GO:0051336	GO:BP	683	832	54	ENSSSCG00000000753,ENSSSCG00000001463,ENSSSCG00000001912,ENSSSCG00000002474,ENSSSCG00000003112,ENSSSCG00000003818,ENSSSCG00000004789,ENSSSCG00000005215,ENSSSCG00000006464,ENSSSCG00000006648,ENSSSCG00000008044,ENSSSCG00000008629,ENSSSCG00000008768,ENSSSCG00000008980,ENSSSCG00000009229,ENSSSCG00000009704,ENSSSCG00000009881,ENSSSCG00000009921,ENSSSCG00000010448,ENSSSCG00000010900,ENSSSCG00000011010,…	WNK1,PSMB9,PML,PPP4R4,BBC3,DOCK7,THBS1,JAK2,NTRK1,CTSS,MLST8,ROCK2,ARAP2,SCARB2,ARHGAP24,HMGB2,OAS2,OASL,FAS,DENND1B,C9orf72,USP6NL,TIMP1,SPINK9,ARHGAP42,PKP4,EPHA4,NOS3,CHN2,ITGA1,NF1,ABR,PDGFRB,RHBDF2,ARHGEF10,PRKCD,RIPK2,DVL2,PMAIP1,CASP10,PSMB8,TBC1D2B,DHCR24,EZH2,CCL4,AQP1,IFI6,F2R,ENSSSCG00000035736,ECT2,WNT5A,BMP2,CCL8,OAS1
334	regulation of cytokine production involved in immune response	GO:0002718	GO:BP	85	832	14	ENSSSCG00000000475,ENSSSCG00000004507,ENSSSCG00000006035,ENSSSCG00000006380,ENSSSCG00000009817,ENSSSCG00000010900,ENSSSCG00000015037,ENSSSCG00000016140,ENSSSCG00000017517,ENSSSCG00000024096,ENSSSCG00000024771,ENSSSCG00000032360,ENSSSCG00000035859,ENSSSCG00000038082	IRAK3,SMAD7,ANGPT1,SLAMF1,P2RX7,DENND1B,IL18,FZD5,TBX21,RIPK2,TICAM1,PANX1,WNT5A,TRAF6
335	cytokine production involved in immune response	GO:0002367	GO:BP	85	832	14	ENSSSCG00000000475,ENSSSCG00000004507,ENSSSCG00000006035,ENSSSCG00000006380,ENSSSCG00000009817,ENSSSCG00000010900,ENSSSCG00000015037,ENSSSCG00000016140,ENSSSCG00000017517,ENSSSCG00000024096,ENSSSCG00000024771,ENSSSCG00000032360,ENSSSCG00000035859,ENSSSCG00000038082	IRAK3,SMAD7,ANGPT1,SLAMF1,P2RX7,DENND1B,IL18,FZD5,TBX21,RIPK2,TICAM1,PANX1,WNT5A,TRAF6
336	regulation of T cell activation	GO:0050863	GO:BP	268	832	28	ENSSSCG00000001453,ENSSSCG00000001727,ENSSSCG00000004507,ENSSSCG00000004687,ENSSSCG00000005055,ENSSSCG00000005211,ENSSSCG00000005215,ENSSSCG00000006380,ENSSSCG00000006862,ENSSSCG00000007007,ENSSSCG00000009542,ENSSSCG00000011951,ENSSSCG00000014101,ENSSSCG00000014277,ENSSSCG00000015037,ENSSSCG00000015487,ENSSSCG00000017466,ENSSSCG00000017517,ENSSSCG00000017754,ENSSSCG00000020970,ENSSSCG00000024096,…	HLA-DRA,TNFRSF21,SMAD7,ENSSSCG00000004687,LGALS3,CD274,JAK2,SLAMF1,VCAM1,IDO1,TNFSF13B,NFKBIZ,AP3B1,IRF1,IL18,TNFSF18,CCR7,TBX21,ENSSSCG00000017754,IL6,RIPK2,SOCS1,ZBTB16,PLA2G2D,PDCD1LG2,ZC3H12A,TRAF6,IL27
337	regulation of MAP kinase activity	GO:0043405	GO:BP	145	832	19	ENSSSCG00000000475,ENSSSCG00000004225,ENSSSCG00000004789,ENSSSCG00000009817,ENSSSCG00000010629,ENSSSCG00000014080,ENSSSCG00000016140,ENSSSCG00000016230,ENSSSCG00000017504,ENSSSCG00000023503,ENSSSCG00000024954,ENSSSCG00000025689,ENSSSCG00000028840,ENSSSCG00000032097,ENSSSCG00000035598,ENSSSCG00000035859,ENSSSCG00000038082,ENSSSCG00000039442,ENSSSCG00000040779	IRAK3,TPD52L1,THBS1,P2RX7,ADRA2A,HMGCR,FZD5,EPHA4,CDK12,PRKCD,FGF1,DVL2,EZH2,DUSP16,EDN1,WNT5A,TRAF6,BMP2,CBS
338	production of molecular mediator of immune response	GO:0002440	GO:BP	171	832	21	ENSSSCG00000000475,ENSSSCG00000003419,ENSSSCG00000004507,ENSSSCG00000006035,ENSSSCG00000006380,ENSSSCG00000009817,ENSSSCG00000009938,ENSSSCG00000010900,ENSSSCG00000011611,ENSSSCG00000011951,ENSSSCG00000015037,ENSSSCG00000016140,ENSSSCG00000017517,ENSSSCG00000017773,ENSSSCG00000020970,ENSSSCG00000024096,ENSSSCG00000024771,ENSSSCG00000027806,ENSSSCG00000032360,ENSSSCG00000035859,ENSSSCG00000038082	IRAK3,MAD2L2,SMAD7,ANGPT1,SLAMF1,P2RX7,UNG,DENND1B,HMCES,NFKBIZ,IL18,FZD5,TBX21,SUPT6H,IL6,RIPK2,TICAM1,SAMHD1,PANX1,WNT5A,TRAF6
339	positive regulation of hydrolase activity	GO:0051345	GO:BP	405	832	37	ENSSSCG00000001912,ENSSSCG00000003112,ENSSSCG00000003818,ENSSSCG00000005215,ENSSSCG00000006464,ENSSSCG00000006648,ENSSSCG00000008629,ENSSSCG00000008768,ENSSSCG00000009229,ENSSSCG00000009704,ENSSSCG00000010448,ENSSSCG00000010900,ENSSSCG00000011010,ENSSSCG00000011120,ENSSSCG00000014976,ENSSSCG00000015878,ENSSSCG00000016230,ENSSSCG00000016687,ENSSSCG00000016885,ENSSSCG00000017748,ENSSSCG00000017804,…	PML,BBC3,DOCK7,JAK2,NTRK1,CTSS,ROCK2,ARAP2,ARHGAP24,HMGB2,FAS,DENND1B,C9orf72,USP6NL,ARHGAP42,PKP4,EPHA4,CHN2,ITGA1,NF1,ABR,PDGFRB,ARHGEF10,PRKCD,RIPK2,DVL2,PMAIP1,CASP10,TBC1D2B,EZH2,CCL4,F2R,ENSSSCG00000035736,ECT2,WNT5A,BMP2,CCL8
340	organic substance transport	GO:0071702	GO:BP	2121	832	131	ENSSSCG00000000148,ENSSSCG00000000466,ENSSSCG00000000625,ENSSSCG00000001909,ENSSSCG00000001912,ENSSSCG00000001934,ENSSSCG00000001952,ENSSSCG00000002263,ENSSSCG00000002671,ENSSSCG00000003112,ENSSSCG00000003669,ENSSSCG00000003805,ENSSSCG00000004125,ENSSSCG00000004509,ENSSSCG00000004789,ENSSSCG00000004829,ENSSSCG00000004830,ENSSSCG00000005055,ENSSSCG00000005167,ENSSSCG00000005385,ENSSSCG00000005423,…	ENSSSCG00000000148,XPOT,LRP6,STRA6,PML,ENSSSCG00000001934,NFKBIA,SLCO3A1,ATP2C2,BBC3,MFSD2A,PDE4B,STX11,LIPG,THBS1,CACHD1,ENSSSCG00000004830,LGALS3,SLC24A2,NR4A3,ABCA1,CCN3,ANGPT1,VPS13B,UHMK1,CRABP2,SCAMP3,SLC50A1,ATP8B2,SNX27,SLC6A17,ABCA4,PCM1,ABCA3,NEURL3,EXOC6B,NBAS,ATP10D,CXCL11,SCARB2,SPP1,P2RX7,SLC35F3,SLC16A9,IFIT1,ADRA2A,PLSCR4,APOD,ATP11C,GAL,UNC93B1,POLA2,SLC15A3,HMGCR,AP3B1,SEC24A,SL…
341	locomotion	GO:0040011	GO:BP	912	832	67	ENSSSCG00000000753,ENSSSCG00000001595,ENSSSCG00000003435,ENSSSCG00000003805,ENSSSCG00000003818,ENSSSCG00000003832,ENSSSCG00000004551,ENSSSCG00000004718,ENSSSCG00000004789,ENSSSCG00000005055,ENSSSCG00000005385,ENSSSCG00000005935,ENSSSCG00000006002,ENSSSCG00000006035,ENSSSCG00000006237,ENSSSCG00000006288,ENSSSCG00000006338,ENSSSCG00000006380,ENSSSCG00000008629,ENSSSCG00000008953,ENSSSCG00000008959,…	WNK1,DAAM2,MIIP,PDE4B,DOCK7,TACSTD2,ZNF609,TTBK2,THBS1,LGALS3,NR4A3,AGO2,CCN3,ANGPT1,SDCBP,SELP,DDR2,SLAMF1,ROCK2,CXCL8,CXCL2,CXCL11,MYCBP2,HMGB2,RET,ADRA2A,JCAD,NRP1,APOD,TIMP1,ICAM1,CXCL14,TNFSF18,EPHA4,NOS3,PTN,ITGA1,CCR7,NF1,STK10,PDGFRB,SCG2,PRKCD,TNFAIP6,CX3CL1,FGF1,DEFB1,IGF1R,ARID2,STK4,SMURF2,CCL4,CXCL10,CXCL9,AQP1,C1QBP,ZNF268,F2R,EDN1,ENSSSCG00000035736,WNT5A,GADD45A,ZC3H12A,BMP2,FLRT2…
342	positive regulation of cell activation	GO:0050867	GO:BP	269	832	28	ENSSSCG00000001453,ENSSSCG00000003419,ENSSSCG00000004687,ENSSSCG00000004789,ENSSSCG00000005211,ENSSSCG00000005215,ENSSSCG00000006288,ENSSSCG00000006380,ENSSSCG00000006862,ENSSSCG00000007432,ENSSSCG00000009542,ENSSSCG00000011611,ENSSSCG00000011951,ENSSSCG00000012713,ENSSSCG00000014101,ENSSSCG00000015037,ENSSSCG00000017466,ENSSSCG00000017517,ENSSSCG00000020970,ENSSSCG00000023351,ENSSSCG00000024096,…	HLA-DRA,MAD2L2,ENSSSCG00000004687,THBS1,CD274,JAK2,SELP,SLAMF1,VCAM1,ZNF335,TNFSF13B,HMCES,NFKBIZ,ATP11C,AP3B1,IL18,CCR7,TBX21,IL6,PLA2G4A,RIPK2,TICAM1,SOCS1,ZBTB16,PDCD1LG2,WNT5A,SNX4,TRAF6
343	positive chemotaxis	GO:0050918	GO:BP	45	832	10	ENSSSCG00000005055,ENSSSCG00000006035,ENSSSCG00000008953,ENSSSCG00000009704,ENSSSCG00000011102,ENSSSCG00000023032,ENSSSCG00000024759,ENSSSCG00000027555,ENSSSCG00000032474,ENSSSCG00000035859	LGALS3,ANGPT1,CXCL8,HMGB2,NRP1,SCG2,CX3CL1,DEFB1,CXCL10,WNT5A
344	tissue development	GO:0009888	GO:BP	1524	832	100	ENSSSCG00000000006,ENSSSCG00000000625,ENSSSCG00000000950,ENSSSCG00000001382,ENSSSCG00000001710,ENSSSCG00000001909,ENSSSCG00000001912,ENSSSCG00000001971,ENSSSCG00000002639,ENSSSCG00000002671,ENSSSCG00000002836,ENSSSCG00000003137,ENSSSCG00000003419,ENSSSCG00000003669,ENSSSCG00000003832,ENSSSCG00000004218,ENSSSCG00000004507,ENSSSCG00000004657,ENSSSCG00000004859,ENSSSCG00000005055,ENSSSCG00000005166,…	PPARA,LRP6,E2F7,DDR1,RUNX2,STRA6,PML,HECTD1,TUBB3,ATP2C2,SALL1,PLEKHA4,MAD2L2,MFSD2A,TACSTD2,RSPO3,SMAD7,CEP152,ZNF516,LGALS3,MLLT3,JAK2,TNC,CCN3,FZD6,VPS13B,SDCBP,GPR161,DDR2,BCL9,PHGDH,SLC20A2,BFSP1,EFEMP1,ROCK2,HHIP,SGMS2,SPP1,ARHGAP24,FREM2,S1PR3,P2RX7,ACTN2,RET,TLL2,BAMBI,NRP1,NPHP3,SKIL,HEG1,NFKBIZ,BCOR,DLG3,GAL,EHF,ICAM1,AP3B1,C2CD3,IL18,HOXD10,STAT1,FZD5,EPHA4,NOS3,PTN,FST,IL31RA,ITGB4,FA…
345	establishment of localization	GO:0051234	GO:BP	3882	832	217	ENSSSCG00000000148,ENSSSCG00000000217,ENSSSCG00000000466,ENSSSCG00000000625,ENSSSCG00000000753,ENSSSCG00000001697,ENSSSCG00000001909,ENSSSCG00000001912,ENSSSCG00000001920,ENSSSCG00000001934,ENSSSCG00000001952,ENSSSCG00000002263,ENSSSCG00000002515,ENSSSCG00000002671,ENSSSCG00000003112,ENSSSCG00000003669,ENSSSCG00000003788,ENSSSCG00000003805,ENSSSCG00000004125,ENSSSCG00000004154,ENSSSCG00000004509,…	ENSSSCG00000000148,RACGAP1,XPOT,LRP6,WNK1,TMEM63B,STRA6,PML,HCN4,ENSSSCG00000001934,NFKBIA,SLCO3A1,SLC25A47,ATP2C2,BBC3,MFSD2A,PTGER3,PDE4B,STX11,TNFAIP3,LIPG,THBS1,CACHD1,ENSSSCG00000004830,LGALS3,SLC24A2,ENTREP1,NR4A3,ABCA1,CCN3,ANGPT1,VPS13B,SDCBP,RCSD1,UHMK1,SLAMF1,CRABP2,SCAMP3,SLC50A1,ATP8B2,SNX27,CTSS,SLC22A15,KCNA3,SLC6A17,MFSD14A,ABCA4,ENSSSCG00000006932,CLCA1,PCM1,SLC20A2,MICALL2,ABCA3,…
346	chemotaxis	GO:0006935	GO:BP	330	832	32	ENSSSCG00000000753,ENSSSCG00000003805,ENSSSCG00000004789,ENSSSCG00000005055,ENSSSCG00000006002,ENSSSCG00000006035,ENSSSCG00000006380,ENSSSCG00000008953,ENSSSCG00000008959,ENSSSCG00000008978,ENSSSCG00000009473,ENSSSCG00000009704,ENSSSCG00000011102,ENSSSCG00000014310,ENSSSCG00000016522,ENSSSCG00000016885,ENSSSCG00000017466,ENSSSCG00000022741,ENSSSCG00000023032,ENSSSCG00000023503,ENSSSCG00000023716,…	WNK1,PDE4B,THBS1,LGALS3,CCN3,ANGPT1,SLAMF1,CXCL8,CXCL2,CXCL11,MYCBP2,HMGB2,NRP1,CXCL14,PTN,ITGA1,CCR7,PDGFRB,SCG2,PRKCD,TNFAIP6,CX3CL1,FGF1,DEFB1,CCL4,CXCL10,CXCL9,C1QBP,ENSSSCG00000035736,WNT5A,FLRT2,CCL8
347	positive regulation of binding	GO:0051099	GO:BP	134	832	18	ENSSSCG00000003197,ENSSSCG00000009704,ENSSSCG00000011014,ENSSSCG00000011632,ENSSSCG00000011876,ENSSSCG00000014780,ENSSSCG00000016230,ENSSSCG00000017488,ENSSSCG00000024096,ENSSSCG00000024771,ENSSSCG00000026733,ENSSSCG00000027709,ENSSSCG00000030820,ENSSSCG00000035859,ENSSSCG00000038082,ENSSSCG00000038348,ENSSSCG00000039348,ENSSSCG00000039442	MED25,HMGB2,BAMBI,NPHP3,DTX3L,TRIM21,EPHA4,CSF3,RIPK2,TICAM1,HIPK2,PARP9,STK4,WNT5A,TRAF6,NME1,H1-0,BMP2
348	protein ubiquitination	GO:0016567	GO:BP	605	832	49	ENSSSCG00000001233,ENSSSCG00000001252,ENSSSCG00000001509,ENSSSCG00000001971,ENSSSCG00000002469,ENSSSCG00000002690,ENSSSCG00000002841,ENSSSCG00000003419,ENSSSCG00000004154,ENSSSCG00000004507,ENSSSCG00000005511,ENSSSCG00000006035,ENSSSCG00000006209,ENSSSCG00000007854,ENSSSCG00000009473,ENSSSCG00000010603,ENSSSCG00000011004,ENSSSCG00000011876,ENSSSCG00000012132,ENSSSCG00000012328,ENSSSCG00000012403,…	TRIM26,UBD,DAXX,HECTD1,OTUB2,GAN,N4BP1,MAD2L2,TNFAIP3,SMAD7,TRAF1,ANGPT1,VCPIP1,DCUN1D3,MYCBP2,NEURL1,TOPORS,DTX3L,ASB9,HUWE1,OGT,ENSSSCG00000014670,TRIM68,TRIM21,ANKIB1,NUB1,TRIM25,SOCS7,HERC6,NMI,UBE2L6,ZNF598,RIPK2,TICAM1,RNF19B,BIRC3,SOCS1,LIMK1,HERC5,ENSSSCG00000031776,RASSF5,SMURF2,TRIM56,TRIM38,SPSB1,ZNRF2,TRAF6,FBXL2,ISG15
349	RNA destabilization	GO:0050779	GO:BP	76	832	13	ENSSSCG00000000078,ENSSSCG00000003015,ENSSSCG00000003591,ENSSSCG00000005935,ENSSSCG00000006776,ENSSSCG00000010706,ENSSSCG00000011465,ENSSSCG00000014204,ENSSSCG00000022616,ENSSSCG00000023126,ENSSSCG00000023408,ENSSSCG00000034373,ENSSSCG00000037815	TNRC6B,EXOSC5,PUM1,AGO2,MOV10,SAMD4B,PDE12,DCP2,DCP1A,TARDBP,SAMD4A,TNRC6C,ZC3H12A
350	blood vessel morphogenesis	GO:0048514	GO:BP	457	832	40	ENSSSCG00000000753,ENSSSCG00000000950,ENSSSCG00000001909,ENSSSCG00000001912,ENSSSCG00000002516,ENSSSCG00000004218,ENSSSCG00000004270,ENSSSCG00000004507,ENSSSCG00000004789,ENSSSCG00000005935,ENSSSCG00000006002,ENSSSCG00000006035,ENSSSCG00000007463,ENSSSCG00000008629,ENSSSCG00000008953,ENSSSCG00000011020,ENSSSCG00000011102,ENSSSCG00000011859,ENSSSCG00000015037,ENSSSCG00000015445,ENSSSCG00000015589,…	WNK1,E2F7,STRA6,PML,WARS1,RSPO3,ADGRB3,SMAD7,THBS1,AGO2,CCN3,ANGPT1,PTGIS,ROCK2,CXCL8,JCAD,NRP1,HEG1,IL18,NRCAM,VASH2,STAT1,FZD5,NOS3,ESM1,PLCD3,NF1,SCG2,FGF1,HIPK2,ARID2,STK4,CXCL10,AQP1,TCF21,EDN1,WNT5A,ZC3H12A,SOX18,APLNR
351	regulation of extrinsic apoptotic signaling pathway via death domain receptors	GO:1902041	GO:BP	37	832	9	ENSSSCG00000000206,ENSSSCG00000004154,ENSSSCG00000004789,ENSSSCG00000005055,ENSSSCG00000009704,ENSSSCG00000011746,ENSSSCG00000013655,ENSSSCG00000016101,ENSSSCG00000030820	FAIM2,TNFAIP3,THBS1,LGALS3,HMGB2,SKIL,ICAM1,CFLAR,STK4
352	taxis	GO:0042330	GO:BP	332	832	32	ENSSSCG00000000753,ENSSSCG00000003805,ENSSSCG00000004789,ENSSSCG00000005055,ENSSSCG00000006002,ENSSSCG00000006035,ENSSSCG00000006380,ENSSSCG00000008953,ENSSSCG00000008959,ENSSSCG00000008978,ENSSSCG00000009473,ENSSSCG00000009704,ENSSSCG00000011102,ENSSSCG00000014310,ENSSSCG00000016522,ENSSSCG00000016885,ENSSSCG00000017466,ENSSSCG00000022741,ENSSSCG00000023032,ENSSSCG00000023503,ENSSSCG00000023716,…	WNK1,PDE4B,THBS1,LGALS3,CCN3,ANGPT1,SLAMF1,CXCL8,CXCL2,CXCL11,MYCBP2,HMGB2,NRP1,CXCL14,PTN,ITGA1,CCR7,PDGFRB,SCG2,PRKCD,TNFAIP6,CX3CL1,FGF1,DEFB1,CCL4,CXCL10,CXCL9,C1QBP,ENSSSCG00000035736,WNT5A,FLRT2,CCL8
353	peptidyl-tyrosine phosphorylation	GO:0018108	GO:BP	229	832	25	ENSSSCG00000001382,ENSSSCG00000005215,ENSSSCG00000006035,ENSSSCG00000006338,ENSSSCG00000006464,ENSSSCG00000008044,ENSSSCG00000008397,ENSSSCG00000008965,ENSSSCG00000010603,ENSSSCG00000010629,ENSSSCG00000011102,ENSSSCG00000011874,ENSSSCG00000015037,ENSSSCG00000015487,ENSSSCG00000016230,ENSSSCG00000016915,ENSSSCG00000017488,ENSSSCG00000020970,ENSSSCG00000022741,ENSSSCG00000023503,ENSSSCG00000024096,…	DDR1,JAK2,ANGPT1,DDR2,NTRK1,MLST8,EFEMP1,BTC,NEURL1,ADRA2A,NRP1,PARP14,IL18,TNFSF18,EPHA4,IL31RA,CSF3,IL6,PDGFRB,PRKCD,RIPK2,DVL2,PARP9,SOCS1,IGF1R
354	post-translational protein modification	GO:0043687	GO:BP	1010	832	72	ENSSSCG00000000457,ENSSSCG00000000774,ENSSSCG00000001233,ENSSSCG00000001252,ENSSSCG00000001509,ENSSSCG00000001971,ENSSSCG00000002469,ENSSSCG00000002690,ENSSSCG00000002841,ENSSSCG00000003419,ENSSSCG00000004154,ENSSSCG00000004507,ENSSSCG00000005215,ENSSSCG00000005511,ENSSSCG00000006035,ENSSSCG00000006209,ENSSSCG00000007023,ENSSSCG00000007311,ENSSSCG00000007854,ENSSSCG00000008382,ENSSSCG00000009042,…	USP15,USP18,TRIM26,UBD,DAXX,HECTD1,OTUB2,GAN,N4BP1,MAD2L2,TNFAIP3,SMAD7,JAK2,TRAF1,ANGPT1,VCPIP1,ENSSSCG00000007023,PHF20,DCUN1D3,USP34,OTUD4,JADE1,MYCBP2,NEURL1,TOPORS,DTX3L,ASB9,JADE3,HUWE1,OGT,HCFC1,ENSSSCG00000014670,TRIM68,TRIM21,ANKIB1,NSD3,IFIH1,NUB1,PARP12,TRIM25,SOCS7,HERC6,NMI,UBE2L6,ZNF598,PRKCD,RIPK2,TICAM1,ELK4,RNF19B,BIRC3,SOCS1,EZH2,LIMK1,HERC5,ZBED1,ENSSSCG00000031776,RASSF5,SMURF…
355	protein modification by small protein conjugation or removal	GO:0070647	GO:BP	797	832	60	ENSSSCG00000000457,ENSSSCG00000000774,ENSSSCG00000001233,ENSSSCG00000001252,ENSSSCG00000001509,ENSSSCG00000001971,ENSSSCG00000002469,ENSSSCG00000002690,ENSSSCG00000002841,ENSSSCG00000003419,ENSSSCG00000004154,ENSSSCG00000004507,ENSSSCG00000005511,ENSSSCG00000006035,ENSSSCG00000006209,ENSSSCG00000007854,ENSSSCG00000008382,ENSSSCG00000009042,ENSSSCG00000009473,ENSSSCG00000010603,ENSSSCG00000011004,…	USP15,USP18,TRIM26,UBD,DAXX,HECTD1,OTUB2,GAN,N4BP1,MAD2L2,TNFAIP3,SMAD7,TRAF1,ANGPT1,VCPIP1,DCUN1D3,USP34,OTUD4,MYCBP2,NEURL1,TOPORS,DTX3L,ASB9,HUWE1,OGT,ENSSSCG00000014670,TRIM68,TRIM21,ANKIB1,IFIH1,NUB1,TRIM25,SOCS7,HERC6,NMI,UBE2L6,ZNF598,RIPK2,TICAM1,RNF19B,BIRC3,SOCS1,LIMK1,HERC5,ZBED1,ENSSSCG00000031776,RASSF5,SMURF2,SENP3,DESI1,TRIM56,TRIM38,SPSB1,RWDD3,ZNRF2,ZC3H12A,TRAF6,FBXL2,CYLD,ISG15
356	positive regulation of cytokine production involved in immune response	GO:0002720	GO:BP	56	832	11	ENSSSCG00000006380,ENSSSCG00000009817,ENSSSCG00000010900,ENSSSCG00000015037,ENSSSCG00000016140,ENSSSCG00000017517,ENSSSCG00000024096,ENSSSCG00000024771,ENSSSCG00000032360,ENSSSCG00000035859,ENSSSCG00000038082	SLAMF1,P2RX7,DENND1B,IL18,FZD5,TBX21,RIPK2,TICAM1,PANX1,WNT5A,TRAF6
357	cytoplasm	GO:0005737	GO:CC	9163	850	510	ENSSSCG00000000061,ENSSSCG00000000135,ENSSSCG00000000186,ENSSSCG00000000206,ENSSSCG00000000207,ENSSSCG00000000396,ENSSSCG00000000403,ENSSSCG00000000457,ENSSSCG00000000466,ENSSSCG00000000475,ENSSSCG00000000523,ENSSSCG00000000623,ENSSSCG00000000625,ENSSSCG00000000665,ENSSSCG00000000700,ENSSSCG00000000753,ENSSSCG00000000774,ENSSSCG00000000906,ENSSSCG00000000932,ENSSSCG00000000981,ENSSSCG00000001233,…	PMM1,KCTD17,RHEBL1,FAIM2,ENSSSCG00000000207,STAT2,BAZ2A,USP15,XPOT,IRAK3,BBS10,BCL2L14,LRP6,RIMKLB,ACRBP,WNK1,USP18,TMCC3,NTS,CRELD2,TRIM26,UBD,ENSSSCG00000001341,HLA-DRA,PSMB9,TAPBP,DAXX,ENSSSCG00000001516,GRM4,ZNF318,RUNX2,PAQR8,CYP1A1,PML,HCN4,ENSSSCG00000001934,NFKBIA,IRF9,FUT8,ZFYVE26,PPP4R4,SLC25A47,WARS1,TUBB3,MTHFSD,ATP2C2,GAN,MLKL,NFAT5,SALL1,N4BP1,EXOSC5,BBC3,MAD2L2,NPPB,UBR4,EIF4G3,PUM…
358	vesicle	GO:0031982	GO:CC	1447	850	111	ENSSSCG00000000625,ENSSSCG00000000700,ENSSSCG00000000932,ENSSSCG00000001341,ENSSSCG00000001453,ENSSSCG00000001523,ENSSSCG00000001934,ENSSSCG00000002298,ENSSSCG00000002671,ENSSSCG00000003805,ENSSSCG00000004125,ENSSSCG00000004509,ENSSSCG00000004789,ENSSSCG00000005211,ENSSSCG00000005249,ENSSSCG00000005423,ENSSSCG00000005935,ENSSSCG00000006071,ENSSSCG00000006237,ENSSSCG00000006288,ENSSSCG00000006289,…	LRP6,ACRBP,NTS,ENSSSCG00000001341,HLA-DRA,GRM4,ENSSSCG00000001934,ZFYVE26,ATP2C2,PDE4B,STX11,LIPG,THBS1,CD274,ENTREP1,ABCA1,AGO2,VPS13B,SDCBP,SELP,F5,GPR161,RCSD1,SLAMF1,NTRK1,SCAMP3,SNX27,CTSS,SLC6A17,VCAM1,ABCA4,CLCA1,MICALL2,ENSSSCG00000007932,ABCA3,NEURL3,RNF149,SCARB2,PRSS12,SGSM1,RET,ENTPD7,DENND1B,C9orf72,NRP1,USP6NL,DNAJC13,MELTF,RUBCN,DTX3L,ATP11C,UNC93B1,PACS1,CDC42EP2,SLC15A3,PIP5K1C,I…
359	extracellular space	GO:0005615	GO:CC	1185	850	95	ENSSSCG00000000148,ENSSSCG00000000197,ENSSSCG00000000981,ENSSSCG00000001341,ENSSSCG00000001394,ENSSSCG00000003431,ENSSSCG00000003832,ENSSSCG00000004509,ENSSSCG00000004789,ENSSSCG00000005055,ENSSSCG00000005211,ENSSSCG00000005494,ENSSSCG00000005638,ENSSSCG00000005935,ENSSSCG00000006035,ENSSSCG00000006237,ENSSSCG00000006288,ENSSSCG00000006289,ENSSSCG00000006648,ENSSSCG00000006862,ENSSSCG00000007463,…	ENSSSCG00000000148,C1QL4,CRELD2,ENSSSCG00000001341,ENSSSCG00000001394,NPPB,TACSTD2,LIPG,THBS1,LGALS3,CD274,TNC,LCN2,AGO2,ANGPT1,SDCBP,SELP,F5,CTSS,VCAM1,PTGIS,ENSSSCG00000007527,ENSSSCG00000007678,EFEMP1,CXCL8,CXCL2,BTC,CXCL11,SPP1,TNFSF13B,HMGB2,TLL2,C9orf72,CCK,ENSSSCG00000011355,APOD,MELTF,TIMP1,GAL,PRRG4,CFD,ICAM1,CXCL14,IL18,NAMPT,FRZB,COL4A4,AOC1,PTN,LRRN3,FST,STC2,FAM20A,CNP,CSF3,GHSR,IL6,…
360	intracellular vesicle	GO:0097708	GO:CC	1339	850	102	ENSSSCG00000000625,ENSSSCG00000000700,ENSSSCG00000000932,ENSSSCG00000001341,ENSSSCG00000001453,ENSSSCG00000001523,ENSSSCG00000001934,ENSSSCG00000002298,ENSSSCG00000002671,ENSSSCG00000003805,ENSSSCG00000004125,ENSSSCG00000004509,ENSSSCG00000004789,ENSSSCG00000005211,ENSSSCG00000005249,ENSSSCG00000005423,ENSSSCG00000006071,ENSSSCG00000006288,ENSSSCG00000006289,ENSSSCG00000006302,ENSSSCG00000006307,…	LRP6,ACRBP,NTS,ENSSSCG00000001341,HLA-DRA,GRM4,ENSSSCG00000001934,ZFYVE26,ATP2C2,PDE4B,STX11,LIPG,THBS1,CD274,ENTREP1,ABCA1,VPS13B,SELP,F5,GPR161,RCSD1,SLAMF1,NTRK1,SCAMP3,SNX27,CTSS,SLC6A17,VCAM1,ABCA4,CLCA1,MICALL2,ENSSSCG00000007932,ABCA3,NEURL3,RNF149,SCARB2,PRSS12,SGSM1,RET,ENTPD7,DENND1B,C9orf72,NRP1,USP6NL,DNAJC13,MELTF,RUBCN,DTX3L,ATP11C,UNC93B1,PACS1,CDC42EP2,SLC15A3,PIP5K1C,AP3B1,SEC24A…
361	cytoplasmic vesicle	GO:0031410	GO:CC	1333	850	101	ENSSSCG00000000625,ENSSSCG00000000700,ENSSSCG00000000932,ENSSSCG00000001341,ENSSSCG00000001453,ENSSSCG00000001523,ENSSSCG00000001934,ENSSSCG00000002298,ENSSSCG00000002671,ENSSSCG00000003805,ENSSSCG00000004125,ENSSSCG00000004509,ENSSSCG00000004789,ENSSSCG00000005211,ENSSSCG00000005249,ENSSSCG00000005423,ENSSSCG00000006071,ENSSSCG00000006288,ENSSSCG00000006289,ENSSSCG00000006302,ENSSSCG00000006307,…	LRP6,ACRBP,NTS,ENSSSCG00000001341,HLA-DRA,GRM4,ENSSSCG00000001934,ZFYVE26,ATP2C2,PDE4B,STX11,LIPG,THBS1,CD274,ENTREP1,ABCA1,VPS13B,SELP,F5,GPR161,RCSD1,SLAMF1,NTRK1,SCAMP3,SNX27,CTSS,SLC6A17,VCAM1,ABCA4,CLCA1,MICALL2,ENSSSCG00000007932,ABCA3,NEURL3,RNF149,SCARB2,PRSS12,SGSM1,RET,ENTPD7,DENND1B,C9orf72,NRP1,USP6NL,DNAJC13,MELTF,RUBCN,DTX3L,ATP11C,UNC93B1,PACS1,CDC42EP2,SLC15A3,PIP5K1C,AP3B1,SEC24A…
362	nucleoplasm	GO:0005654	GO:CC	3109	850	193	ENSSSCG00000000006,ENSSSCG00000000217,ENSSSCG00000000403,ENSSSCG00000000457,ENSSSCG00000000466,ENSSSCG00000000661,ENSSSCG00000000950,ENSSSCG00000001252,ENSSSCG00000001509,ENSSSCG00000001549,ENSSSCG00000001561,ENSSSCG00000001667,ENSSSCG00000001710,ENSSSCG00000001888,ENSSSCG00000001912,ENSSSCG00000001971,ENSSSCG00000002755,ENSSSCG00000002841,ENSSSCG00000003015,ENSSSCG00000003197,ENSSSCG00000003488,…	PPARA,RACGAP1,BAZ2A,USP15,XPOT,PHC1,E2F7,UBD,DAXX,FKBP5,ETV7,ZNF318,RUNX2,RPP25,PML,HECTD1,NFAT5,N4BP1,EXOSC5,MED25,UBR4,PUM1,ANKRD12,CELF4,HIVEP2,ASF1A,SMAD7,ZNF609,CEP152,CNDP2,NIN,LGALS3,MLLT3,CD274,JAK2,RORB,TLE4,SETX,ATAD2,SDCBP,UHMK1,USF1,CRABP2,ADAR,HIPK1,CDC14A,PCM1,PHF20,RBL1,ZNF335,SRCAP,DCUN1D3,CIITA,UBN1,CAPG,PLEKHH2,NCOA1,CMPK2,LYAR,ATP10D,JADE1,SGMS2,MYCBP2,HMBOX1,HMGB2,OAS2,OASL,UN…
363	extracellular region	GO:0005576	GO:CC	1637	850	115	ENSSSCG00000000148,ENSSSCG00000000197,ENSSSCG00000000700,ENSSSCG00000000932,ENSSSCG00000000981,ENSSSCG00000001341,ENSSSCG00000001394,ENSSSCG00000003431,ENSSSCG00000003832,ENSSSCG00000004218,ENSSSCG00000004270,ENSSSCG00000004509,ENSSSCG00000004687,ENSSSCG00000004789,ENSSSCG00000005055,ENSSSCG00000005211,ENSSSCG00000005494,ENSSSCG00000005638,ENSSSCG00000005935,ENSSSCG00000006002,ENSSSCG00000006035,…	ENSSSCG00000000148,C1QL4,ACRBP,NTS,CRELD2,ENSSSCG00000001341,ENSSSCG00000001394,NPPB,TACSTD2,RSPO3,ADGRB3,LIPG,ENSSSCG00000004687,THBS1,LGALS3,CD274,TNC,LCN2,AGO2,CCN3,ANGPT1,SDCBP,SELP,F5,CTSS,VCAM1,PTGIS,ENSSSCG00000007527,ENSSSCG00000007678,EFEMP1,HTRA3,CXCL8,CXCL2,BTC,CXCL11,PRSS12,SPP1,TNFSF13B,HMGB2,SPOCK3,TLL2,C9orf72,CCK,ENSSSCG00000011355,APOD,MELTF,TIMP1,GAL,PRRG4,CFD,ICAM1,ERAP1,CXCL14…
364	intracellular anatomical structure	GO:0005622	GO:CC	13985	850	655	ENSSSCG00000000006,ENSSSCG00000000061,ENSSSCG00000000135,ENSSSCG00000000186,ENSSSCG00000000206,ENSSSCG00000000207,ENSSSCG00000000217,ENSSSCG00000000396,ENSSSCG00000000403,ENSSSCG00000000457,ENSSSCG00000000466,ENSSSCG00000000475,ENSSSCG00000000523,ENSSSCG00000000623,ENSSSCG00000000625,ENSSSCG00000000661,ENSSSCG00000000665,ENSSSCG00000000700,ENSSSCG00000000753,ENSSSCG00000000774,ENSSSCG00000000906,…	PPARA,PMM1,KCTD17,RHEBL1,FAIM2,ENSSSCG00000000207,RACGAP1,STAT2,BAZ2A,USP15,XPOT,IRAK3,BBS10,BCL2L14,LRP6,PHC1,RIMKLB,ACRBP,WNK1,USP18,TMCC3,NTS,E2F7,CRELD2,TRIM26,UBD,ENSSSCG00000001341,HLA-DRA,PSMB9,TAPBP,DAXX,ENSSSCG00000001516,GRM4,FKBP5,ETV7,ZNF318,TMEM63B,RUNX2,PAQR8,PEAK1,RPP25,CYP1A1,PML,HCN4,ENSSSCG00000001934,NFKBIA,BAZ1A,HECTD1,IRF9,FUT8,PLEKHH1,ZFYVE26,RIOX1,OTUB2,DDX24,PPP4R4,SLC25A4…
365	endomembrane system	GO:0012505	GO:CC	3090	850	187	ENSSSCG00000000135,ENSSSCG00000000206,ENSSSCG00000000466,ENSSSCG00000000625,ENSSSCG00000000700,ENSSSCG00000000906,ENSSSCG00000000932,ENSSSCG00000000981,ENSSSCG00000001341,ENSSSCG00000001453,ENSSSCG00000001507,ENSSSCG00000001750,ENSSSCG00000001906,ENSSSCG00000001934,ENSSSCG00000002283,ENSSSCG00000002298,ENSSSCG00000002671,ENSSSCG00000003112,ENSSSCG00000003805,ENSSSCG00000004087,ENSSSCG00000004125,…	KCTD17,FAIM2,XPOT,LRP6,ACRBP,TMCC3,NTS,CRELD2,ENSSSCG00000001341,HLA-DRA,TAPBP,PAQR8,CYP1A1,ENSSSCG00000001934,FUT8,ZFYVE26,ATP2C2,BBC3,PDE4B,CCDC170,STX11,LIPG,THBS1,ATL1,CD274,JAK2,ENTREP1,ABCA1,MAMDC4,FZD6,VPS13B,SDCBP,SELP,F5,GPR161,RCSD1,B4GALT3,USF1,NTRK1,CRABP2,SCAMP3,SLC50A1,ATP8B2,SNX27,CTSS,BCL9,SLC6A17,VCAM1,ABCA4,CLCA1,PCM1,PHF20,PTGIS,MICALL2,SRCAP,ENSSSCG00000007932,ABCA3,NEURL3,RNF…
366	cytosol	GO:0005829	GO:CC	3132	850	182	ENSSSCG00000000061,ENSSSCG00000000396,ENSSSCG00000000403,ENSSSCG00000000457,ENSSSCG00000000466,ENSSSCG00000000523,ENSSSCG00000000623,ENSSSCG00000000753,ENSSSCG00000000774,ENSSSCG00000001463,ENSSSCG00000001667,ENSSSCG00000001912,ENSSSCG00000001934,ENSSSCG00000001952,ENSSSCG00000002002,ENSSSCG00000002474,ENSSSCG00000002516,ENSSSCG00000002716,ENSSSCG00000002755,ENSSSCG00000002841,ENSSSCG00000003015,…	PMM1,STAT2,BAZ2A,USP15,XPOT,BBS10,BCL2L14,WNK1,USP18,PSMB9,ZNF318,PML,ENSSSCG00000001934,NFKBIA,IRF9,PPP4R4,WARS1,MLKL,NFAT5,N4BP1,EXOSC5,MAD2L2,UBR4,PUM1,ANKRD12,PDE4B,SMAD7,LACTB,MAPK6,TTBK2,CNDP2,LGALS3,MLLT3,JAK2,PSAT1,AGO2,SDCBP,RCSD1,B4GALT3,CRABP2,ATP8B2,SNX27,HIPK1,MOV10,CDC14A,DPYD,PCM1,PHF20,ZBP1,DCUN1D3,CIITA,ADRA2B,USP34,PLEKHH2,EIF2AK2,NCOA1,ROCK2,OTUD4,AKAP11,MYCBP2,HMBOX1,DDX60,OAS…
367	endosome	GO:0005768	GO:CC	677	850	55	ENSSSCG00000000625,ENSSSCG00000001453,ENSSSCG00000002298,ENSSSCG00000004509,ENSSSCG00000005211,ENSSSCG00000005249,ENSSSCG00000005423,ENSSSCG00000006302,ENSSSCG00000006307,ENSSSCG00000006464,ENSSSCG00000006520,ENSSSCG00000006619,ENSSSCG00000006648,ENSSSCG00000006862,ENSSSCG00000007557,ENSSSCG00000008051,ENSSSCG00000008124,ENSSSCG00000008168,ENSSSCG00000010199,ENSSSCG00000011010,ENSSSCG00000011102,…	LRP6,HLA-DRA,ZFYVE26,LIPG,CD274,ENTREP1,ABCA1,GPR161,RCSD1,NTRK1,SCAMP3,SNX27,CTSS,VCAM1,MICALL2,ABCA3,NEURL3,RNF149,RET,C9orf72,NRP1,DNAJC13,MELTF,RUBCN,DTX3L,ATP11C,UNC93B1,SLC15A3,PIP5K1C,HTR4,STEAP4,ENSSSCG00000015823,FZD5,EPHA4,RAB11FIP4,EHD4,PRKCD,SLC2A4,TICAM1,RAB8B,PI4K2B,TBC1D2B,TMEM9,UVRAG,ACAP2,CHMP7,PMEPA1,RASSF9,F2R,RAB7B,PTP4A3,SNX4,ATP6AP1,SORCS2,RAB12
368	cytoplasmic ribonucleoprotein granule	GO:0036464	GO:CC	190	850	23	ENSSSCG00000003591,ENSSSCG00000005935,ENSSSCG00000006342,ENSSSCG00000006776,ENSSSCG00000008629,ENSSSCG00000010706,ENSSSCG00000011010,ENSSSCG00000011117,ENSSSCG00000011951,ENSSSCG00000014204,ENSSSCG00000015014,ENSSSCG00000015981,ENSSSCG00000017272,ENSSSCG00000017614,ENSSSCG00000022616,ENSSSCG00000023408,ENSSSCG00000026733,ENSSSCG00000027855,ENSSSCG00000030108,ENSSSCG00000032531,ENSSSCG00000034373,…	PUM1,AGO2,UHMK1,MOV10,ROCK2,SAMD4B,C9orf72,UPF2,NFKBIZ,DCP2,ZC3H12C,HOXD10,HELZ,TRIM25,DCP1A,SAMD4A,HIPK2,SOCS1,ZNFX1,SMG1,TNRC6C,ZC3H12A,PSMA2
369	ribonucleoprotein granule	GO:0035770	GO:CC	206	850	24	ENSSSCG00000003591,ENSSSCG00000005935,ENSSSCG00000006342,ENSSSCG00000006776,ENSSSCG00000008629,ENSSSCG00000010706,ENSSSCG00000011010,ENSSSCG00000011117,ENSSSCG00000011951,ENSSSCG00000014204,ENSSSCG00000015014,ENSSSCG00000015981,ENSSSCG00000017272,ENSSSCG00000017614,ENSSSCG00000022616,ENSSSCG00000023408,ENSSSCG00000026733,ENSSSCG00000027855,ENSSSCG00000030108,ENSSSCG00000032531,ENSSSCG00000034373,…	PUM1,AGO2,UHMK1,MOV10,ROCK2,SAMD4B,C9orf72,UPF2,NFKBIZ,DCP2,ZC3H12C,HOXD10,HELZ,TRIM25,DCP1A,SAMD4A,HIPK2,SOCS1,ZNFX1,SMG1,TNRC6C,ZC3H12A,PSMA2,FASTKD5
370	nuclear lumen	GO:0031981	GO:CC	4073	850	221	ENSSSCG00000000006,ENSSSCG00000000217,ENSSSCG00000000403,ENSSSCG00000000457,ENSSSCG00000000466,ENSSSCG00000000661,ENSSSCG00000000950,ENSSSCG00000001252,ENSSSCG00000001509,ENSSSCG00000001549,ENSSSCG00000001561,ENSSSCG00000001667,ENSSSCG00000001710,ENSSSCG00000001888,ENSSSCG00000001912,ENSSSCG00000001958,ENSSSCG00000001971,ENSSSCG00000002344,ENSSSCG00000002470,ENSSSCG00000002755,ENSSSCG00000002841,…	PPARA,RACGAP1,BAZ2A,USP15,XPOT,PHC1,E2F7,UBD,DAXX,FKBP5,ETV7,ZNF318,RUNX2,RPP25,PML,BAZ1A,HECTD1,RIOX1,DDX24,NFAT5,N4BP1,EXOSC5,MED25,MAD2L2,UBR4,PUM1,ANKRD12,CELF4,HIVEP2,ASF1A,SMAD7,ZNF609,CEP152,CNDP2,NIN,LGALS3,MLLT3,CD274,JAK2,RORB,TLE4,SETX,ATAD2,SDCBP,UHMK1,USF1,CRABP2,ADAR,ATP8B2,HIPK1,CDC14A,PCM1,PHF20,RBL1,ENSSSCG00000007355,ZNF335,SRCAP,DCUN1D3,CIITA,UBN1,CAPG,PLEKHH2,NCOA1,CMPK2,LYAR,…
371	cellular anatomical entity	GO:0110165	GO:CC	19853	850	846	ENSSSCG00000000006,ENSSSCG00000000061,ENSSSCG00000000135,ENSSSCG00000000148,ENSSSCG00000000186,ENSSSCG00000000197,ENSSSCG00000000206,ENSSSCG00000000207,ENSSSCG00000000217,ENSSSCG00000000396,ENSSSCG00000000403,ENSSSCG00000000457,ENSSSCG00000000466,ENSSSCG00000000475,ENSSSCG00000000523,ENSSSCG00000000623,ENSSSCG00000000625,ENSSSCG00000000661,ENSSSCG00000000665,ENSSSCG00000000700,ENSSSCG00000000730,…	PPARA,PMM1,KCTD17,ENSSSCG00000000148,RHEBL1,C1QL4,FAIM2,ENSSSCG00000000207,RACGAP1,STAT2,BAZ2A,USP15,XPOT,IRAK3,BBS10,BCL2L14,LRP6,PHC1,RIMKLB,ACRBP,PRMT8,WNK1,USP18,TMCC3,NTS,E2F7,CRELD2,ENSSSCG00000001229,TRIM26,UBD,ENSSSCG00000001341,DDR1,ENSSSCG00000001394,ENSSSCG00000001398,HLA-DRA,PSMB9,TAPBP,DAXX,ENSSSCG00000001516,GRM4,FKBP5,ETV7,CPNE5,ZNF318,TMEM63B,RUNX2,TNFRSF21,PAQR8,PEAK1,RPP25,CYP1A…
372	early endosome	GO:0005769	GO:CC	266	850	27	ENSSSCG00000000625,ENSSSCG00000002298,ENSSSCG00000004509,ENSSSCG00000005211,ENSSSCG00000005249,ENSSSCG00000006307,ENSSSCG00000006464,ENSSSCG00000006619,ENSSSCG00000006862,ENSSSCG00000008124,ENSSSCG00000011102,ENSSSCG00000011628,ENSSSCG00000011837,ENSSSCG00000011853,ENSSSCG00000011876,ENSSSCG00000016140,ENSSSCG00000016230,ENSSSCG00000020666,ENSSSCG00000024771,ENSSSCG00000027340,ENSSSCG00000027477,…	LRP6,ZFYVE26,LIPG,CD274,ENTREP1,RCSD1,NTRK1,SNX27,VCAM1,NEURL3,NRP1,DNAJC13,MELTF,RUBCN,DTX3L,FZD5,EPHA4,EHD4,TICAM1,PI4K2B,TBC1D2B,UVRAG,PMEPA1,F2R,PTP4A3,SNX4,SORCS2
373	membrane-enclosed lumen	GO:0031974	GO:CC	4405	850	232	ENSSSCG00000000006,ENSSSCG00000000217,ENSSSCG00000000403,ENSSSCG00000000457,ENSSSCG00000000466,ENSSSCG00000000661,ENSSSCG00000000950,ENSSSCG00000001252,ENSSSCG00000001509,ENSSSCG00000001549,ENSSSCG00000001561,ENSSSCG00000001667,ENSSSCG00000001710,ENSSSCG00000001888,ENSSSCG00000001912,ENSSSCG00000001958,ENSSSCG00000001971,ENSSSCG00000002344,ENSSSCG00000002470,ENSSSCG00000002755,ENSSSCG00000002841,…	PPARA,RACGAP1,BAZ2A,USP15,XPOT,PHC1,E2F7,UBD,DAXX,FKBP5,ETV7,ZNF318,RUNX2,RPP25,PML,BAZ1A,HECTD1,RIOX1,DDX24,NFAT5,N4BP1,EXOSC5,MED25,MAD2L2,UBR4,PUM1,ANKRD12,CELF4,HIVEP2,ASF1A,SMAD7,ZNF609,CEP152,GATM,CNDP2,NIN,LGALS3,MLLT3,CD274,JAK2,RORB,TLE4,SETX,ATAD2,SDCBP,UHMK1,USF1,CRABP2,ADAR,ATP8B2,HIPK1,CDC14A,PCM1,PHF20,RBL1,ENSSSCG00000007355,ZNF335,SRCAP,DCUN1D3,CIITA,UBN1,CAPG,PLEKHH2,NCOA1,CMPK2,…
374	intracellular organelle lumen	GO:0070013	GO:CC	4405	850	232	ENSSSCG00000000006,ENSSSCG00000000217,ENSSSCG00000000403,ENSSSCG00000000457,ENSSSCG00000000466,ENSSSCG00000000661,ENSSSCG00000000950,ENSSSCG00000001252,ENSSSCG00000001509,ENSSSCG00000001549,ENSSSCG00000001561,ENSSSCG00000001667,ENSSSCG00000001710,ENSSSCG00000001888,ENSSSCG00000001912,ENSSSCG00000001958,ENSSSCG00000001971,ENSSSCG00000002344,ENSSSCG00000002470,ENSSSCG00000002755,ENSSSCG00000002841,…	PPARA,RACGAP1,BAZ2A,USP15,XPOT,PHC1,E2F7,UBD,DAXX,FKBP5,ETV7,ZNF318,RUNX2,RPP25,PML,BAZ1A,HECTD1,RIOX1,DDX24,NFAT5,N4BP1,EXOSC5,MED25,MAD2L2,UBR4,PUM1,ANKRD12,CELF4,HIVEP2,ASF1A,SMAD7,ZNF609,CEP152,GATM,CNDP2,NIN,LGALS3,MLLT3,CD274,JAK2,RORB,TLE4,SETX,ATAD2,SDCBP,UHMK1,USF1,CRABP2,ADAR,ATP8B2,HIPK1,CDC14A,PCM1,PHF20,RBL1,ENSSSCG00000007355,ZNF335,SRCAP,DCUN1D3,CIITA,UBN1,CAPG,PLEKHH2,NCOA1,CMPK2,…
375	organelle lumen	GO:0043233	GO:CC	4405	850	232	ENSSSCG00000000006,ENSSSCG00000000217,ENSSSCG00000000403,ENSSSCG00000000457,ENSSSCG00000000466,ENSSSCG00000000661,ENSSSCG00000000950,ENSSSCG00000001252,ENSSSCG00000001509,ENSSSCG00000001549,ENSSSCG00000001561,ENSSSCG00000001667,ENSSSCG00000001710,ENSSSCG00000001888,ENSSSCG00000001912,ENSSSCG00000001958,ENSSSCG00000001971,ENSSSCG00000002344,ENSSSCG00000002470,ENSSSCG00000002755,ENSSSCG00000002841,…	PPARA,RACGAP1,BAZ2A,USP15,XPOT,PHC1,E2F7,UBD,DAXX,FKBP5,ETV7,ZNF318,RUNX2,RPP25,PML,BAZ1A,HECTD1,RIOX1,DDX24,NFAT5,N4BP1,EXOSC5,MED25,MAD2L2,UBR4,PUM1,ANKRD12,CELF4,HIVEP2,ASF1A,SMAD7,ZNF609,CEP152,GATM,CNDP2,NIN,LGALS3,MLLT3,CD274,JAK2,RORB,TLE4,SETX,ATAD2,SDCBP,UHMK1,USF1,CRABP2,ADAR,ATP8B2,HIPK1,CDC14A,PCM1,PHF20,RBL1,ENSSSCG00000007355,ZNF335,SRCAP,DCUN1D3,CIITA,UBN1,CAPG,PLEKHH2,NCOA1,CMPK2,…
376	ISGF3 complex	GO:0070721	GO:CC	3	850	3	ENSSSCG00000000396,ENSSSCG00000002002,ENSSSCG00000016057	STAT2,IRF9,STAT1
377	P-body	GO:0000932	GO:CC	67	850	11	ENSSSCG00000003591,ENSSSCG00000005935,ENSSSCG00000006776,ENSSSCG00000010706,ENSSSCG00000011010,ENSSSCG00000014204,ENSSSCG00000022616,ENSSSCG00000023408,ENSSSCG00000034373,ENSSSCG00000037815,ENSSSCG00000039582	PUM1,AGO2,MOV10,SAMD4B,C9orf72,DCP2,DCP1A,SAMD4A,TNRC6C,ZC3H12A,PSMA2
378	intracellular membrane-bounded organelle	GO:0043231	GO:CC	11148	850	518	ENSSSCG00000000006,ENSSSCG00000000135,ENSSSCG00000000206,ENSSSCG00000000217,ENSSSCG00000000396,ENSSSCG00000000403,ENSSSCG00000000457,ENSSSCG00000000466,ENSSSCG00000000475,ENSSSCG00000000625,ENSSSCG00000000661,ENSSSCG00000000700,ENSSSCG00000000774,ENSSSCG00000000906,ENSSSCG00000000932,ENSSSCG00000000950,ENSSSCG00000000981,ENSSSCG00000001252,ENSSSCG00000001341,ENSSSCG00000001453,ENSSSCG00000001463,…	PPARA,KCTD17,FAIM2,RACGAP1,STAT2,BAZ2A,USP15,XPOT,IRAK3,LRP6,PHC1,ACRBP,USP18,TMCC3,NTS,E2F7,CRELD2,UBD,ENSSSCG00000001341,HLA-DRA,PSMB9,TAPBP,DAXX,ENSSSCG00000001516,GRM4,FKBP5,ETV7,ZNF318,RUNX2,PAQR8,RPP25,CYP1A1,PML,ENSSSCG00000001934,NFKBIA,BAZ1A,HECTD1,IRF9,FUT8,ZFYVE26,RIOX1,OTUB2,DDX24,SLC25A47,WARS1,ATP2C2,MLKL,NFAT5,SALL1,N4BP1,EXOSC5,BBC3,MED25,MAD2L2,NPPB,UBR4,PUM1,RLF,ANKRD12,CELF4,PD…
379	protein binding	GO:0005515	GO:MF	7453	828	472	ENSSSCG00000000006,ENSSSCG00000000135,ENSSSCG00000000197,ENSSSCG00000000217,ENSSSCG00000000386,ENSSSCG00000000396,ENSSSCG00000000403,ENSSSCG00000000457,ENSSSCG00000000466,ENSSSCG00000000475,ENSSSCG00000000523,ENSSSCG00000000623,ENSSSCG00000000625,ENSSSCG00000000661,ENSSSCG00000000700,ENSSSCG00000000730,ENSSSCG00000000753,ENSSSCG00000000906,ENSSSCG00000000932,ENSSSCG00000000950,ENSSSCG00000001233,…	PPARA,KCTD17,C1QL4,RACGAP1,ANKRD52,STAT2,BAZ2A,USP15,XPOT,IRAK3,BBS10,BCL2L14,LRP6,PHC1,ACRBP,PRMT8,WNK1,TMCC3,NTS,E2F7,TRIM26,UBD,ENSSSCG00000001341,ENSSSCG00000001394,HLA-DRA,TAPBP,DAXX,ENSSSCG00000001516,FKBP5,DAAM2,ZNF318,RUNX2,TNFRSF21,PEAK1,ISLR,PML,HCN4,NFKBIA,BAZ1A,HECTD1,IRF9,SLCO3A1,FUT8,ZFYVE26,OTUB2,WARS1,TUBB3,GAN,MLKL,SALL1,N4BP1,MED25,MAD2L2,NPPB,UBR4,EIF4G3,ANKRD12,ANKRD29,IMPACT,…
380	signaling receptor binding	GO:0005102	GO:MF	1134	828	108	ENSSSCG00000000457,ENSSSCG00000000625,ENSSSCG00000000932,ENSSSCG00000001341,ENSSSCG00000001394,ENSSSCG00000001453,ENSSSCG00000002639,ENSSSCG00000003431,ENSSSCG00000004218,ENSSSCG00000004507,ENSSSCG00000004789,ENSSSCG00000005055,ENSSSCG00000005215,ENSSSCG00000005423,ENSSSCG00000005511,ENSSSCG00000005975,ENSSSCG00000006002,ENSSSCG00000006035,ENSSSCG00000006237,ENSSSCG00000006474,ENSSSCG00000006862,…	USP15,LRP6,NTS,ENSSSCG00000001341,ENSSSCG00000001394,HLA-DRA,TUBB3,NPPB,RSPO3,SMAD7,THBS1,LGALS3,JAK2,ABCA1,TRAF1,MTSS1,CCN3,ANGPT1,SDCBP,NES,VCAM1,ENSSSCG00000007527,EFEMP1,ADRA2C,RASL11B,CXCL8,CXCL2,BTC,CXCL11,SPP1,TNFSF13B,S1PR3,HMGB2,ADRA2A,BAMBI,CCK,PLSCR4,SEMA5B,TIMP1,GAL,UNC93B1,CDC42EP2,ICAM4,ICAM1,ERAP1,CXCL14,IL18,NAMPT,TNFSF18,STAT1,SNED1,PTN,LIFR,ITGA1,FST,ESM1,STC2,ITGB4,CSF3,TRIM25,…
381	ion binding	GO:0043167	GO:MF	4761	828	307	ENSSSCG00000000006,ENSSSCG00000000186,ENSSSCG00000000207,ENSSSCG00000000217,ENSSSCG00000000403,ENSSSCG00000000475,ENSSSCG00000000523,ENSSSCG00000000661,ENSSSCG00000000665,ENSSSCG00000000730,ENSSSCG00000000753,ENSSSCG00000000981,ENSSSCG00000001233,ENSSSCG00000001382,ENSSSCG00000001667,ENSSSCG00000001710,ENSSSCG00000001869,ENSSSCG00000001906,ENSSSCG00000001912,ENSSSCG00000001934,ENSSSCG00000001958,…	PPARA,RHEBL1,ENSSSCG00000000207,RACGAP1,BAZ2A,IRAK3,BBS10,PHC1,RIMKLB,PRMT8,WNK1,CRELD2,TRIM26,DDR1,ZNF318,RUNX2,PEAK1,CYP1A1,PML,ENSSSCG00000001934,BAZ1A,HECTD1,ZFYVE26,RIOX1,DDX24,WARS1,TUBB3,ATP2C2,MLKL,PLEKHA4,ZNF614,UBR4,MOCOS,IFI44,PDE4B,TAB2,TNFAIP3,HDDC2,SMAD7,LIPG,CA12,MAPK6,TTBK2,THBS1,CACHD1,ENSSSCG00000004830,CNDP2,ATL1,NIN,JAK2,RORB,PSAT1,NR4A3,ABCA1,TRAF1,LCN2,AGO2,ATAD2,ZFHX4,SDCBP…
382	binding	GO:0005488	GO:MF	13567	828	700	ENSSSCG00000000006,ENSSSCG00000000078,ENSSSCG00000000135,ENSSSCG00000000148,ENSSSCG00000000186,ENSSSCG00000000197,ENSSSCG00000000207,ENSSSCG00000000217,ENSSSCG00000000386,ENSSSCG00000000396,ENSSSCG00000000403,ENSSSCG00000000457,ENSSSCG00000000466,ENSSSCG00000000475,ENSSSCG00000000523,ENSSSCG00000000623,ENSSSCG00000000625,ENSSSCG00000000661,ENSSSCG00000000665,ENSSSCG00000000700,ENSSSCG00000000730,…	PPARA,TNRC6B,KCTD17,ENSSSCG00000000148,RHEBL1,C1QL4,ENSSSCG00000000207,RACGAP1,ANKRD52,STAT2,BAZ2A,USP15,XPOT,IRAK3,BBS10,BCL2L14,LRP6,PHC1,RIMKLB,ACRBP,PRMT8,WNK1,TMCC3,NTS,E2F7,CRELD2,TRIM26,UBD,ENSSSCG00000001341,DDR1,ENSSSCG00000001394,HLA-DRA,TAPBP,DAXX,ENSSSCG00000001516,FKBP5,ETV7,CPNE5,DAAM2,ZNF318,RUNX2,TNFRSF21,PAQR8,PEAK1,RPP25,CYP1A1,ISLR,PML,HCN4,ENSSSCG00000001934,NFKBIA,BAZ1A,HECTD…
383	molecular function activator activity	GO:0140677	GO:MF	930	828	86	ENSSSCG00000000217,ENSSSCG00000000457,ENSSSCG00000000753,ENSSSCG00000000932,ENSSSCG00000001509,ENSSSCG00000001934,ENSSSCG00000003431,ENSSSCG00000003897,ENSSSCG00000004110,ENSSSCG00000004270,ENSSSCG00000005055,ENSSSCG00000005249,ENSSSCG00000006648,ENSSSCG00000006994,ENSSSCG00000007527,ENSSSCG00000008044,ENSSSCG00000008496,ENSSSCG00000008768,ENSSSCG00000008953,ENSSSCG00000008959,ENSSSCG00000008965,…	RACGAP1,USP15,WNK1,NTS,DAXX,ENSSSCG00000001934,NPPB,MOB3C,TAB2,ADGRB3,LGALS3,ENTREP1,CTSS,PCM1,ENSSSCG00000007527,MLST8,EIF2AK2,ARAP2,CXCL8,CXCL2,BTC,CXCL11,SPP1,ARHGAP24,TNFSF13B,HMGB2,SGSM1,SH3PXD2A,NRP1,USP6NL,CCK,TIMP1,STARD8,GAL,CDC42EP2,PPP2R5B,CSTPP1,CXCL14,ARHGAP42,IL18,NAMPT,NSD3,CFLAR,PTN,CHN2,STC2,FAM20A,CSF3,NF1,ABR,GHSR,IL6,CGAS,ENSSSCG00000022331,TIRAP,DCP1A,SCG2,PRKCD,MT3,CX3CL1,TI…
384	enzyme binding	GO:0019899	GO:MF	1635	828	126	ENSSSCG00000000006,ENSSSCG00000000217,ENSSSCG00000000396,ENSSSCG00000000466,ENSSSCG00000000475,ENSSSCG00000000623,ENSSSCG00000000730,ENSSSCG00000000753,ENSSSCG00000001509,ENSSSCG00000001595,ENSSSCG00000001912,ENSSSCG00000001952,ENSSSCG00000002298,ENSSSCG00000002516,ENSSSCG00000002716,ENSSSCG00000003419,ENSSSCG00000003818,ENSSSCG00000004154,ENSSSCG00000004507,ENSSSCG00000004624,ENSSSCG00000004657,…	PPARA,RACGAP1,STAT2,XPOT,IRAK3,BCL2L14,PRMT8,WNK1,DAXX,DAAM2,PML,NFKBIA,ZFYVE26,WARS1,MLKL,MAD2L2,DOCK7,TNFAIP3,SMAD7,MAPK6,CEP152,WDR76,THBS1,NIN,LGALS3,JAK2,NR4A3,ABCA1,TRAF1,AGO2,ANGPT1,FZD6,USF1,SCAMP3,ZNF335,MICALL2,DCUN1D3,SPRED2,STRN,ROCK2,SCARB2,MYCBP2,KIF13B,SGSM1,TTC28,FAS,PPP1R3C,BLNK,SH3PXD2A,ADRA2A,DENND1B,TOPORS,C9orf72,NRP1,USP6NL,PRKAR2A,PLSCR4,PARP14,DTX3L,BCOR,TIMP1,DLG3,DIAPH2,…
385	carbohydrate derivative binding	GO:0097367	GO:MF	1934	828	143	ENSSSCG00000000186,ENSSSCG00000000475,ENSSSCG00000000523,ENSSSCG00000000665,ENSSSCG00000000753,ENSSSCG00000001382,ENSSSCG00000001710,ENSSSCG00000001869,ENSSSCG00000002470,ENSSSCG00000002516,ENSSSCG00000002639,ENSSSCG00000002671,ENSSSCG00000002716,ENSSSCG00000003763,ENSSSCG00000003805,ENSSSCG00000004218,ENSSSCG00000004509,ENSSSCG00000004624,ENSSSCG00000004718,ENSSSCG00000004789,ENSSSCG00000004829,…	RHEBL1,IRAK3,BBS10,RIMKLB,WNK1,DDR1,RUNX2,PEAK1,DDX24,WARS1,TUBB3,ATP2C2,MLKL,IFI44,PDE4B,RSPO3,LIPG,MAPK6,TTBK2,THBS1,CACHD1,ENSSSCG00000004830,ATL1,JAK2,ABCA1,TNC,ATAD2,SDCBP,SELP,DDR2,UHMK1,NTRK1,ATP8B2,CTSS,HIPK1,ABCA4,GBP2,TTLL9,ENSSSCG00000007733,SRCAP,CIITA,ABCA3,EIF2AK2,ROCK2,ATP10D,TEC,RASL11B,CXCL8,CXCL11,ABCG2,KIF13B,DDX60,P2RX7,OAS2,RET,ENTPD7,NRP1,PFKFB3,PRKAR2A,MX2,MX1,SMC1A,ATP11C,…
386	anion binding	GO:0043168	GO:MF	2101	828	147	ENSSSCG00000000186,ENSSSCG00000000217,ENSSSCG00000000475,ENSSSCG00000000523,ENSSSCG00000000665,ENSSSCG00000000753,ENSSSCG00000001382,ENSSSCG00000001710,ENSSSCG00000001869,ENSSSCG00000002470,ENSSSCG00000002516,ENSSSCG00000002639,ENSSSCG00000002671,ENSSSCG00000002716,ENSSSCG00000003137,ENSSSCG00000003744,ENSSSCG00000003763,ENSSSCG00000003805,ENSSSCG00000004624,ENSSSCG00000004718,ENSSSCG00000004829,…	RHEBL1,RACGAP1,IRAK3,BBS10,RIMKLB,WNK1,DDR1,RUNX2,PEAK1,DDX24,WARS1,TUBB3,ATP2C2,MLKL,PLEKHA4,MOCOS,IFI44,PDE4B,MAPK6,TTBK2,CACHD1,ENSSSCG00000004830,ATL1,JAK2,PSAT1,ABCA1,LCN2,ATAD2,SDCBP,SELP,DDR2,UHMK1,NTRK1,CRABP2,ATP8B2,HIPK1,ABCA4,GBP2,TTLL9,ENSSSCG00000007733,SRCAP,CIITA,ABCA3,CAPG,EIF2AK2,ROCK2,ARAP2,ATP10D,TEC,RASL11B,ABCG2,KIF13B,DDX60,P2RX7,ACAD10,OAS2,ACTN2,RET,AIFM2,ENTPD7,SH3PXD2A,P…
387	molecular function regulator activity	GO:0098772	GO:MF	1674	828	123	ENSSSCG00000000217,ENSSSCG00000000457,ENSSSCG00000000625,ENSSSCG00000000753,ENSSSCG00000000932,ENSSSCG00000001509,ENSSSCG00000001934,ENSSSCG00000002474,ENSSSCG00000002516,ENSSSCG00000003431,ENSSSCG00000003818,ENSSSCG00000003897,ENSSSCG00000004110,ENSSSCG00000004270,ENSSSCG00000004507,ENSSSCG00000004789,ENSSSCG00000005055,ENSSSCG00000005249,ENSSSCG00000006648,ENSSSCG00000006994,ENSSSCG00000007527,…	RACGAP1,USP15,LRP6,WNK1,NTS,DAXX,ENSSSCG00000001934,PPP4R4,WARS1,NPPB,DOCK7,MOB3C,TAB2,ADGRB3,SMAD7,THBS1,LGALS3,ENTREP1,CTSS,PCM1,ENSSSCG00000007527,MLST8,EIF2AK2,LYAR,ARAP2,RAPGEF2,CXCL8,CXCL2,BTC,CXCL11,SPP1,ARHGAP24,MYCBP2,TNFSF13B,HMGB2,SGSM1,SH3PXD2A,DENND1B,C9orf72,NRP1,USP6NL,CCK,ENSSSCG00000011355,PRKAR2A,DTX3L,TIMP1,TMEM35A,STARD8,GAL,CDC42EP2,PPP2R5B,CSTPP1,ARHGEF18,HMGCR,CXCL14,SPINK9…
388	intramembrane lipid transporter activity	GO:0140303	GO:MF	39	828	12	ENSSSCG00000003669,ENSSSCG00000004830,ENSSSCG00000005423,ENSSSCG00000006550,ENSSSCG00000006890,ENSSSCG00000008051,ENSSSCG00000008812,ENSSSCG00000011690,ENSSSCG00000012713,ENSSSCG00000017668,ENSSSCG00000030623,ENSSSCG00000035634	MFSD2A,ENSSSCG00000004830,ABCA1,ATP8B2,ABCA4,ABCA3,ATP10D,PLSCR4,ATP11C,VMP1,XKR8,PLSCR1
389	ribonucleotide binding	GO:0032553	GO:MF	1693	828	121	ENSSSCG00000000186,ENSSSCG00000000475,ENSSSCG00000000523,ENSSSCG00000000665,ENSSSCG00000000753,ENSSSCG00000001382,ENSSSCG00000001710,ENSSSCG00000001869,ENSSSCG00000002470,ENSSSCG00000002516,ENSSSCG00000002639,ENSSSCG00000002671,ENSSSCG00000002716,ENSSSCG00000003763,ENSSSCG00000003805,ENSSSCG00000004624,ENSSSCG00000004718,ENSSSCG00000004829,ENSSSCG00000004830,ENSSSCG00000005020,ENSSSCG00000005215,…	RHEBL1,IRAK3,BBS10,RIMKLB,WNK1,DDR1,RUNX2,PEAK1,DDX24,WARS1,TUBB3,ATP2C2,MLKL,IFI44,PDE4B,MAPK6,TTBK2,CACHD1,ENSSSCG00000004830,ATL1,JAK2,ABCA1,ATAD2,DDR2,UHMK1,NTRK1,ATP8B2,HIPK1,ABCA4,GBP2,TTLL9,ENSSSCG00000007733,SRCAP,CIITA,ABCA3,EIF2AK2,ROCK2,ATP10D,TEC,RASL11B,ABCG2,KIF13B,DDX60,P2RX7,OAS2,RET,ENTPD7,PFKFB3,PRKAR2A,MX2,MX1,SMC1A,ATP11C,MARK2,KIF18A,MKNK2,PIP5K1C,HMGCR,ACSL6,RAB30,CHORDC1,AS…
390	signaling receptor regulator activity	GO:0030545	GO:MF	447	828	45	ENSSSCG00000000932,ENSSSCG00000003431,ENSSSCG00000005055,ENSSSCG00000007527,ENSSSCG00000008953,ENSSSCG00000008959,ENSSSCG00000008965,ENSSSCG00000008978,ENSSSCG00000009216,ENSSSCG00000009542,ENSSSCG00000009704,ENSSSCG00000011277,ENSSSCG00000012277,ENSSSCG00000012490,ENSSSCG00000012883,ENSSSCG00000012996,ENSSSCG00000014310,ENSSSCG00000015037,ENSSSCG00000015435,ENSSSCG00000016522,ENSSSCG00000016892,…	NTS,NPPB,LGALS3,ENSSSCG00000007527,CXCL8,CXCL2,BTC,CXCL11,SPP1,TNFSF13B,HMGB2,CCK,TIMP1,TMEM35A,GAL,CDC42EP2,CXCL14,IL18,NAMPT,PTN,FST,STC2,CSF3,GHSR,IL6,ENSSSCG00000022331,SCG2,CX3CL1,FGF1,IL17D,DEFB1,CCL4,CXCL10,CXCL9,LY6H,GDF15,TAFA2,INHBA,EDN1,ENSSSCG00000035736,WNT5A,VGF,BMP2,FLRT2,CCL8
391	cytokine receptor binding	GO:0005126	GO:MF	233	828	29	ENSSSCG00000000457,ENSSSCG00000004507,ENSSSCG00000005215,ENSSSCG00000005511,ENSSSCG00000006237,ENSSSCG00000006474,ENSSSCG00000008835,ENSSSCG00000008953,ENSSSCG00000008959,ENSSSCG00000008978,ENSSSCG00000009542,ENSSSCG00000014171,ENSSSCG00000014310,ENSSSCG00000015037,ENSSSCG00000015487,ENSSSCG00000016057,ENSSSCG00000016850,ENSSSCG00000017488,ENSSSCG00000020906,ENSSSCG00000020970,ENSSSCG00000024759,…	USP15,SMAD7,JAK2,TRAF1,SDCBP,NES,RASL11B,CXCL8,CXCL2,CXCL11,TNFSF13B,ERAP1,CXCL14,IL18,TNFSF18,STAT1,LIFR,CSF3,GHSR,IL6,CX3CL1,DEFB1,CCL4,CXCL10,CXCL9,ENSSSCG00000035736,TRAF6,IL27,CCL8
392	receptor ligand activity	GO:0048018	GO:MF	415	828	42	ENSSSCG00000000932,ENSSSCG00000003431,ENSSSCG00000005055,ENSSSCG00000007527,ENSSSCG00000008953,ENSSSCG00000008959,ENSSSCG00000008965,ENSSSCG00000008978,ENSSSCG00000009216,ENSSSCG00000009542,ENSSSCG00000009704,ENSSSCG00000011277,ENSSSCG00000012277,ENSSSCG00000012883,ENSSSCG00000012996,ENSSSCG00000014310,ENSSSCG00000015037,ENSSSCG00000015435,ENSSSCG00000016522,ENSSSCG00000016983,ENSSSCG00000017488,…	NTS,NPPB,LGALS3,ENSSSCG00000007527,CXCL8,CXCL2,BTC,CXCL11,SPP1,TNFSF13B,HMGB2,CCK,TIMP1,GAL,CDC42EP2,CXCL14,IL18,NAMPT,PTN,STC2,CSF3,GHSR,IL6,ENSSSCG00000022331,SCG2,CX3CL1,FGF1,IL17D,DEFB1,CCL4,CXCL10,CXCL9,GDF15,TAFA2,INHBA,EDN1,ENSSSCG00000035736,WNT5A,VGF,BMP2,FLRT2,CCL8
393	nucleoside phosphate binding	GO:1901265	GO:MF	1910	828	131	ENSSSCG00000000186,ENSSSCG00000000475,ENSSSCG00000000523,ENSSSCG00000000665,ENSSSCG00000000753,ENSSSCG00000001382,ENSSSCG00000001710,ENSSSCG00000001869,ENSSSCG00000002470,ENSSSCG00000002516,ENSSSCG00000002639,ENSSSCG00000002671,ENSSSCG00000002716,ENSSSCG00000003763,ENSSSCG00000003805,ENSSSCG00000004624,ENSSSCG00000004718,ENSSSCG00000004829,ENSSSCG00000004830,ENSSSCG00000005020,ENSSSCG00000005215,…	RHEBL1,IRAK3,BBS10,RIMKLB,WNK1,DDR1,RUNX2,PEAK1,DDX24,WARS1,TUBB3,ATP2C2,MLKL,IFI44,PDE4B,MAPK6,TTBK2,CACHD1,ENSSSCG00000004830,ATL1,JAK2,ABCA1,ATAD2,DDR2,UHMK1,NTRK1,ATP8B2,PHGDH,HIPK1,DPYD,ABCA4,GBP2,TTLL9,ENSSSCG00000007733,SRCAP,CIITA,ABCA3,TET3,EIF2AK2,ROCK2,ATP10D,TEC,RASL11B,ABCG2,KIF13B,DDX60,P2RX7,ACAD10,OAS2,RET,AIFM2,ENTPD7,PFKFB3,PRKAR2A,MX2,MX1,SMC1A,ATP11C,MARK2,KIF18A,MKNK2,PIP5K1C…
394	nucleotide binding	GO:0000166	GO:MF	1910	828	131	ENSSSCG00000000186,ENSSSCG00000000475,ENSSSCG00000000523,ENSSSCG00000000665,ENSSSCG00000000753,ENSSSCG00000001382,ENSSSCG00000001710,ENSSSCG00000001869,ENSSSCG00000002470,ENSSSCG00000002516,ENSSSCG00000002639,ENSSSCG00000002671,ENSSSCG00000002716,ENSSSCG00000003763,ENSSSCG00000003805,ENSSSCG00000004624,ENSSSCG00000004718,ENSSSCG00000004829,ENSSSCG00000004830,ENSSSCG00000005020,ENSSSCG00000005215,…	RHEBL1,IRAK3,BBS10,RIMKLB,WNK1,DDR1,RUNX2,PEAK1,DDX24,WARS1,TUBB3,ATP2C2,MLKL,IFI44,PDE4B,MAPK6,TTBK2,CACHD1,ENSSSCG00000004830,ATL1,JAK2,ABCA1,ATAD2,DDR2,UHMK1,NTRK1,ATP8B2,PHGDH,HIPK1,DPYD,ABCA4,GBP2,TTLL9,ENSSSCG00000007733,SRCAP,CIITA,ABCA3,TET3,EIF2AK2,ROCK2,ATP10D,TEC,RASL11B,ABCG2,KIF13B,DDX60,P2RX7,ACAD10,OAS2,RET,AIFM2,ENTPD7,PFKFB3,PRKAR2A,MX2,MX1,SMC1A,ATP11C,MARK2,KIF18A,MKNK2,PIP5K1C…
395	cation binding	GO:0043169	GO:MF	3112	828	195	ENSSSCG00000000006,ENSSSCG00000000207,ENSSSCG00000000217,ENSSSCG00000000403,ENSSSCG00000000475,ENSSSCG00000000661,ENSSSCG00000000665,ENSSSCG00000000730,ENSSSCG00000000981,ENSSSCG00000001233,ENSSSCG00000001667,ENSSSCG00000001906,ENSSSCG00000001912,ENSSSCG00000001934,ENSSSCG00000001958,ENSSSCG00000001971,ENSSSCG00000002298,ENSSSCG00000002344,ENSSSCG00000003241,ENSSSCG00000003488,ENSSSCG00000003744,…	PPARA,ENSSSCG00000000207,RACGAP1,BAZ2A,IRAK3,PHC1,RIMKLB,PRMT8,CRELD2,TRIM26,ZNF318,CYP1A1,PML,ENSSSCG00000001934,BAZ1A,HECTD1,ZFYVE26,RIOX1,ZNF614,UBR4,MOCOS,PDE4B,TAB2,TNFAIP3,HDDC2,SMAD7,LIPG,CA12,THBS1,ENSSSCG00000004830,CNDP2,NIN,JAK2,RORB,NR4A3,ABCA1,TRAF1,LCN2,AGO2,ZFHX4,SELP,F5,B4GALT3,ATP8B2,IDO1,ENSSSCG00000007023,PHF20,PTGIS,MICALL2,ENSSSCG00000007733,NEURL3,ENSSSCG00000008147,RNF149,T…
396	purine ribonucleotide binding	GO:0032555	GO:MF	1678	828	118	ENSSSCG00000000186,ENSSSCG00000000475,ENSSSCG00000000523,ENSSSCG00000000665,ENSSSCG00000000753,ENSSSCG00000001382,ENSSSCG00000001710,ENSSSCG00000001869,ENSSSCG00000002470,ENSSSCG00000002516,ENSSSCG00000002639,ENSSSCG00000002671,ENSSSCG00000002716,ENSSSCG00000003763,ENSSSCG00000003805,ENSSSCG00000004624,ENSSSCG00000004718,ENSSSCG00000004829,ENSSSCG00000004830,ENSSSCG00000005020,ENSSSCG00000005215,…	RHEBL1,IRAK3,BBS10,RIMKLB,WNK1,DDR1,RUNX2,PEAK1,DDX24,WARS1,TUBB3,ATP2C2,MLKL,IFI44,PDE4B,MAPK6,TTBK2,CACHD1,ENSSSCG00000004830,ATL1,JAK2,ABCA1,ATAD2,DDR2,UHMK1,NTRK1,ATP8B2,HIPK1,ABCA4,GBP2,TTLL9,SRCAP,CIITA,ABCA3,EIF2AK2,ROCK2,ATP10D,TEC,RASL11B,ABCG2,KIF13B,DDX60,P2RX7,OAS2,RET,ENTPD7,PFKFB3,PRKAR2A,MX2,MX1,SMC1A,ATP11C,MARK2,KIF18A,MKNK2,PIP5K1C,HMGCR,ACSL6,RAB30,CHORDC1,ASNS,RNASEL,IFIH1,EPH…
397	purine nucleotide binding	GO:0017076	GO:MF	1772	828	123	ENSSSCG00000000186,ENSSSCG00000000475,ENSSSCG00000000523,ENSSSCG00000000665,ENSSSCG00000000753,ENSSSCG00000001382,ENSSSCG00000001710,ENSSSCG00000001869,ENSSSCG00000002470,ENSSSCG00000002516,ENSSSCG00000002639,ENSSSCG00000002671,ENSSSCG00000002716,ENSSSCG00000003763,ENSSSCG00000003805,ENSSSCG00000004624,ENSSSCG00000004718,ENSSSCG00000004829,ENSSSCG00000004830,ENSSSCG00000005020,ENSSSCG00000005215,…	RHEBL1,IRAK3,BBS10,RIMKLB,WNK1,DDR1,RUNX2,PEAK1,DDX24,WARS1,TUBB3,ATP2C2,MLKL,IFI44,PDE4B,MAPK6,TTBK2,CACHD1,ENSSSCG00000004830,ATL1,JAK2,ABCA1,ATAD2,DDR2,UHMK1,NTRK1,ATP8B2,PHGDH,HIPK1,DPYD,ABCA4,GBP2,TTLL9,SRCAP,CIITA,ABCA3,EIF2AK2,ROCK2,ATP10D,TEC,RASL11B,ABCG2,KIF13B,DDX60,P2RX7,OAS2,RET,ENTPD7,PFKFB3,PRKAR2A,MX2,MX1,SMC1A,ATP11C,MARK2,KIF18A,MKNK2,PIP5K1C,HMGCR,ACSL6,RAB30,CHORDC1,ASNS,RNASE…
398	purine ribonucleoside triphosphate binding	GO:0035639	GO:MF	1630	828	115	ENSSSCG00000000186,ENSSSCG00000000475,ENSSSCG00000000523,ENSSSCG00000000665,ENSSSCG00000000753,ENSSSCG00000001382,ENSSSCG00000001710,ENSSSCG00000001869,ENSSSCG00000002470,ENSSSCG00000002516,ENSSSCG00000002639,ENSSSCG00000002671,ENSSSCG00000002716,ENSSSCG00000003763,ENSSSCG00000004624,ENSSSCG00000004718,ENSSSCG00000004829,ENSSSCG00000004830,ENSSSCG00000005020,ENSSSCG00000005215,ENSSSCG00000005423,…	RHEBL1,IRAK3,BBS10,RIMKLB,WNK1,DDR1,RUNX2,PEAK1,DDX24,WARS1,TUBB3,ATP2C2,MLKL,IFI44,MAPK6,TTBK2,CACHD1,ENSSSCG00000004830,ATL1,JAK2,ABCA1,ATAD2,DDR2,UHMK1,NTRK1,ATP8B2,HIPK1,ABCA4,GBP2,TTLL9,SRCAP,CIITA,ABCA3,EIF2AK2,ROCK2,ATP10D,TEC,RASL11B,ABCG2,KIF13B,DDX60,P2RX7,OAS2,RET,ENTPD7,PFKFB3,MX2,MX1,SMC1A,ATP11C,MARK2,KIF18A,MKNK2,PIP5K1C,ACSL6,RAB30,CHORDC1,ASNS,RNASEL,IFIH1,EPHA4,GIMAP8,MYO10,DCAK…
399	signaling receptor activator activity	GO:0030546	GO:MF	421	828	42	ENSSSCG00000000932,ENSSSCG00000003431,ENSSSCG00000005055,ENSSSCG00000007527,ENSSSCG00000008953,ENSSSCG00000008959,ENSSSCG00000008965,ENSSSCG00000008978,ENSSSCG00000009216,ENSSSCG00000009542,ENSSSCG00000009704,ENSSSCG00000011277,ENSSSCG00000012277,ENSSSCG00000012883,ENSSSCG00000012996,ENSSSCG00000014310,ENSSSCG00000015037,ENSSSCG00000015435,ENSSSCG00000016522,ENSSSCG00000016983,ENSSSCG00000017488,…	NTS,NPPB,LGALS3,ENSSSCG00000007527,CXCL8,CXCL2,BTC,CXCL11,SPP1,TNFSF13B,HMGB2,CCK,TIMP1,GAL,CDC42EP2,CXCL14,IL18,NAMPT,PTN,STC2,CSF3,GHSR,IL6,ENSSSCG00000022331,SCG2,CX3CL1,FGF1,IL17D,DEFB1,CCL4,CXCL10,CXCL9,GDF15,TAFA2,INHBA,EDN1,ENSSSCG00000035736,WNT5A,VGF,BMP2,FLRT2,CCL8
400	metal ion binding	GO:0046872	GO:MF	3029	828	189	ENSSSCG00000000006,ENSSSCG00000000207,ENSSSCG00000000217,ENSSSCG00000000403,ENSSSCG00000000475,ENSSSCG00000000661,ENSSSCG00000000665,ENSSSCG00000000981,ENSSSCG00000001233,ENSSSCG00000001667,ENSSSCG00000001906,ENSSSCG00000001912,ENSSSCG00000001934,ENSSSCG00000001958,ENSSSCG00000001971,ENSSSCG00000002298,ENSSSCG00000002344,ENSSSCG00000003241,ENSSSCG00000003488,ENSSSCG00000003744,ENSSSCG00000003805,…	PPARA,ENSSSCG00000000207,RACGAP1,BAZ2A,IRAK3,PHC1,RIMKLB,CRELD2,TRIM26,ZNF318,CYP1A1,PML,ENSSSCG00000001934,BAZ1A,HECTD1,ZFYVE26,RIOX1,ZNF614,UBR4,MOCOS,PDE4B,TAB2,TNFAIP3,HDDC2,SMAD7,LIPG,CA12,THBS1,ENSSSCG00000004830,CNDP2,NIN,JAK2,RORB,NR4A3,TRAF1,LCN2,AGO2,ZFHX4,SELP,F5,B4GALT3,ATP8B2,IDO1,ENSSSCG00000007023,PHF20,PTGIS,MICALL2,ENSSSCG00000007733,NEURL3,ENSSSCG00000008147,RNF149,TET3,EFEMP1,R…
401	chemokine receptor binding	GO:0042379	GO:MF	54	828	12	ENSSSCG00000006474,ENSSSCG00000008953,ENSSSCG00000008959,ENSSSCG00000008978,ENSSSCG00000014310,ENSSSCG00000024759,ENSSSCG00000027555,ENSSSCG00000032343,ENSSSCG00000032474,ENSSSCG00000032777,ENSSSCG00000035736,ENSSSCG00000040648	NES,CXCL8,CXCL2,CXCL11,CXCL14,CX3CL1,DEFB1,CCL4,CXCL10,CXCL9,ENSSSCG00000035736,CCL8
402	chemokine activity	GO:0008009	GO:MF	39	828	10	ENSSSCG00000008953,ENSSSCG00000008959,ENSSSCG00000008978,ENSSSCG00000014310,ENSSSCG00000024759,ENSSSCG00000032343,ENSSSCG00000032474,ENSSSCG00000032777,ENSSSCG00000035736,ENSSSCG00000040648	CXCL8,CXCL2,CXCL11,CXCL14,CX3CL1,CCL4,CXCL10,CXCL9,ENSSSCG00000035736,CCL8
403	G protein-coupled receptor binding	GO:0001664	GO:MF	230	828	27	ENSSSCG00000000625,ENSSSCG00000000932,ENSSSCG00000004218,ENSSSCG00000006237,ENSSSCG00000006474,ENSSSCG00000007527,ENSSSCG00000008703,ENSSSCG00000008953,ENSSSCG00000008959,ENSSSCG00000008978,ENSSSCG00000010629,ENSSSCG00000011014,ENSSSCG00000012883,ENSSSCG00000014310,ENSSSCG00000017204,ENSSSCG00000024759,ENSSSCG00000025689,ENSSSCG00000027555,ENSSSCG00000032343,ENSSSCG00000032474,ENSSSCG00000032777,…	LRP6,NTS,RSPO3,SDCBP,NES,ENSSSCG00000007527,ADRA2C,CXCL8,CXCL2,CXCL11,ADRA2A,BAMBI,GAL,CXCL14,ITGB4,CX3CL1,DVL2,DEFB1,CCL4,CXCL10,CXCL9,EDN1,ENSSSCG00000035736,WNT5A,FEM1A,CCL8,GNAT1
404	small molecule binding	GO:0036094	GO:MF	2206	828	143	ENSSSCG00000000186,ENSSSCG00000000475,ENSSSCG00000000523,ENSSSCG00000000665,ENSSSCG00000000753,ENSSSCG00000001382,ENSSSCG00000001710,ENSSSCG00000001869,ENSSSCG00000002470,ENSSSCG00000002516,ENSSSCG00000002639,ENSSSCG00000002671,ENSSSCG00000002716,ENSSSCG00000003744,ENSSSCG00000003763,ENSSSCG00000003805,ENSSSCG00000004624,ENSSSCG00000004718,ENSSSCG00000004829,ENSSSCG00000004830,ENSSSCG00000005020,…	RHEBL1,IRAK3,BBS10,RIMKLB,WNK1,DDR1,RUNX2,PEAK1,DDX24,WARS1,TUBB3,ATP2C2,MLKL,MOCOS,IFI44,PDE4B,MAPK6,TTBK2,CACHD1,ENSSSCG00000004830,ATL1,JAK2,PSAT1,ABCA1,LCN2,ATAD2,SELP,DDR2,UHMK1,NTRK1,CRABP2,ATP8B2,PHGDH,HIPK1,DPYD,ABCA4,GBP2,TTLL9,ENSSSCG00000007733,SRCAP,CIITA,ABCA3,TET3,EIF2AK2,ROCK2,ATP10D,TEC,RASL11B,SCARB2,ABCG2,KIF13B,DDX60,P2RX7,ACAD10,OAS2,RET,AIFM2,ENTPD7,PFKFB3,PRKAR2A,APOD,MX2,MX…
405	kinase binding	GO:0019900	GO:MF	577	828	50	ENSSSCG00000000217,ENSSSCG00000000475,ENSSSCG00000000623,ENSSSCG00000000753,ENSSSCG00000001509,ENSSSCG00000002298,ENSSSCG00000002516,ENSSSCG00000002716,ENSSSCG00000003419,ENSSSCG00000004154,ENSSSCG00000004624,ENSSSCG00000004657,ENSSSCG00000005022,ENSSSCG00000005215,ENSSSCG00000005385,ENSSSCG00000006035,ENSSSCG00000006371,ENSSSCG00000008357,ENSSSCG00000009683,ENSSSCG00000009968,ENSSSCG00000010448,…	RACGAP1,IRAK3,BCL2L14,WNK1,DAXX,ZFYVE26,WARS1,MLKL,MAD2L2,TNFAIP3,MAPK6,CEP152,NIN,JAK2,NR4A3,ANGPT1,USF1,SPRED2,KIF13B,TTC28,FAS,BLNK,ADRA2A,NRP1,PRKAR2A,DLG3,ENSSSCG00000014670,TRIM68,TRIM21,FZD5,ACSL3,EPHA4,PTN,CDK12,CDC25A,TIRAP,PDGFRB,PRKCD,JAKMIP3,TICAM1,DVL2,SOCS1,DUSP16,SLC12A7,TRIM38,INKA2,GADD45A,TRAF6,CYLD,LLGL1
406	ATPase-coupled intramembrane lipid transporter activity	GO:0140326	GO:MF	26	828	8	ENSSSCG00000003669,ENSSSCG00000004830,ENSSSCG00000005423,ENSSSCG00000006550,ENSSSCG00000006890,ENSSSCG00000008051,ENSSSCG00000008812,ENSSSCG00000012713	MFSD2A,ENSSSCG00000004830,ABCA1,ATP8B2,ABCA4,ABCA3,ATP10D,ATP11C
407	catalytic activity	GO:0003824	GO:MF	5412	828	304	ENSSSCG00000000061,ENSSSCG00000000186,ENSSSCG00000000457,ENSSSCG00000000475,ENSSSCG00000000665,ENSSSCG00000000730,ENSSSCG00000000753,ENSSSCG00000000774,ENSSSCG00000000981,ENSSSCG00000001233,ENSSSCG00000001382,ENSSSCG00000001463,ENSSSCG00000001549,ENSSSCG00000001869,ENSSSCG00000001888,ENSSSCG00000001906,ENSSSCG00000001912,ENSSSCG00000001971,ENSSSCG00000002283,ENSSSCG00000002344,ENSSSCG00000002469,…	PMM1,RHEBL1,USP15,IRAK3,RIMKLB,PRMT8,WNK1,USP18,CRELD2,TRIM26,DDR1,PSMB9,FKBP5,PEAK1,RPP25,CYP1A1,PML,HECTD1,FUT8,RIOX1,OTUB2,DDX24,WARS1,TUBB3,ATP2C2,MLKL,N4BP1,DHRS3,UBR4,RHBDL2,MOCOS,PDE4B,TAB2,TNFAIP3,HDDC2,LIPG,CA12,LACTB,MAPK6,DTWD1,GATM,TTBK2,CACHD1,ENSSSCG00000004830,CNDP2,ATL1,JAK2,PSAT1,ABCA1,SETX,AGO2,ATAD2,VCPIP1,DDR2,UHMK1,B4GALT3,NTRK1,ADAR,ATP8B2,CTSS,ACP6,PHGDH,HIPK1,MOV10,VCAM1,C…
408	catalytic activity, acting on a protein	GO:0140096	GO:MF	2148	828	139	ENSSSCG00000000457,ENSSSCG00000000475,ENSSSCG00000000730,ENSSSCG00000000753,ENSSSCG00000000774,ENSSSCG00000000981,ENSSSCG00000001233,ENSSSCG00000001382,ENSSSCG00000001463,ENSSSCG00000001549,ENSSSCG00000001869,ENSSSCG00000001912,ENSSSCG00000001971,ENSSSCG00000002283,ENSSSCG00000002344,ENSSSCG00000002469,ENSSSCG00000002716,ENSSSCG00000003488,ENSSSCG00000003651,ENSSSCG00000004154,ENSSSCG00000004569,…	USP15,IRAK3,PRMT8,WNK1,USP18,CRELD2,TRIM26,DDR1,PSMB9,FKBP5,PEAK1,PML,HECTD1,FUT8,RIOX1,OTUB2,MLKL,UBR4,RHBDL2,TNFAIP3,LACTB,MAPK6,TTBK2,CNDP2,JAK2,VCPIP1,DDR2,UHMK1,NTRK1,CTSS,HIPK1,CDC14A,ENSSSCG00000006932,CLCA1,ENSSSCG00000007023,TTLL9,NEURL3,RNF149,USP34,EFEMP1,EIF2AK2,ROCK2,HTRA3,TEC,OTUD4,JADE1,PRSS12,MYCBP2,PPTC7,HECTD4,RET,TLL2,NEURL1,XPNPEP1,TOPORS,NRP1,EOGT,HMCES,PARP14,DTX3L,BCOR,HUWE…
409	cytokine activity	GO:0005125	GO:MF	199	828	24	ENSSSCG00000008953,ENSSSCG00000008959,ENSSSCG00000008978,ENSSSCG00000009216,ENSSSCG00000012277,ENSSSCG00000014310,ENSSSCG00000015037,ENSSSCG00000015435,ENSSSCG00000017488,ENSSSCG00000020906,ENSSSCG00000020970,ENSSSCG00000023032,ENSSSCG00000024759,ENSSSCG00000025308,ENSSSCG00000032343,ENSSSCG00000032474,ENSSSCG00000032777,ENSSSCG00000034260,ENSSSCG00000035077,ENSSSCG00000035598,ENSSSCG00000035736,…	CXCL8,CXCL2,CXCL11,SPP1,TIMP1,CXCL14,IL18,NAMPT,CSF3,GHSR,IL6,SCG2,CX3CL1,IL17D,CCL4,CXCL10,CXCL9,GDF15,INHBA,EDN1,ENSSSCG00000035736,WNT5A,BMP2,CCL8
410	integrin binding	GO:0005178	GO:MF	109	828	16	ENSSSCG00000004789,ENSSSCG00000006002,ENSSSCG00000006862,ENSSSCG00000009216,ENSSSCG00000009580,ENSSSCG00000013654,ENSSSCG00000013655,ENSSSCG00000016522,ENSSSCG00000016885,ENSSSCG00000016900,ENSSSCG00000017204,ENSSSCG00000017869,ENSSSCG00000024759,ENSSSCG00000024954,ENSSSCG00000031648,ENSSSCG00000040575	THBS1,CCN3,VCAM1,SPP1,S1PR3,ICAM4,ICAM1,PTN,ITGA1,ESM1,ITGB4,ITGAE,CX3CL1,FGF1,CCN5,ISG15
411	enzyme activator activity	GO:0008047	GO:MF	466	828	41	ENSSSCG00000000217,ENSSSCG00000000457,ENSSSCG00000000753,ENSSSCG00000001509,ENSSSCG00000001934,ENSSSCG00000003897,ENSSSCG00000004110,ENSSSCG00000004270,ENSSSCG00000005249,ENSSSCG00000006648,ENSSSCG00000008044,ENSSSCG00000008768,ENSSSCG00000008965,ENSSSCG00000009229,ENSSSCG00000009951,ENSSSCG00000010604,ENSSSCG00000011102,ENSSSCG00000011120,ENSSSCG00000012828,ENSSSCG00000012996,ENSSSCG00000013016,…	RACGAP1,USP15,WNK1,DAXX,ENSSSCG00000001934,MOB3C,TAB2,ADGRB3,ENTREP1,CTSS,MLST8,ARAP2,BTC,ARHGAP24,SGSM1,SH3PXD2A,NRP1,USP6NL,STARD8,CDC42EP2,PPP2R5B,CSTPP1,ARHGAP42,CFLAR,CHN2,FAM20A,NF1,ABR,CGAS,DCP1A,PRKCD,MT3,TICAM1,TBC1D2B,ENSSSCG00000028004,ACAP2,ECT2,TRAF6,BMP2,CCL8,LLGL1
412	antigen binding	GO:0003823	GO:MF	31	828	8	ENSSSCG00000001341,ENSSSCG00000001394,ENSSSCG00000001453,ENSSSCG00000011004,ENSSSCG00000023333,ENSSSCG00000025593,ENSSSCG00000025618,ENSSSCG00000027525	ENSSSCG00000001341,ENSSSCG00000001394,HLA-DRA,TOPORS,FCN2,TAP2,TAP1,DHCR24
413	identical protein binding	GO:0042802	GO:MF	1613	828	107	ENSSSCG00000000135,ENSSSCG00000000197,ENSSSCG00000000396,ENSSSCG00000000457,ENSSSCG00000000475,ENSSSCG00000000625,ENSSSCG00000000730,ENSSSCG00000000906,ENSSSCG00000000950,ENSSSCG00000001516,ENSSSCG00000001667,ENSSSCG00000001869,ENSSSCG00000001912,ENSSSCG00000001920,ENSSSCG00000001952,ENSSSCG00000002516,ENSSSCG00000004154,ENSSSCG00000004225,ENSSSCG00000004789,ENSSSCG00000005020,ENSSSCG00000005215,…	KCTD17,C1QL4,STAT2,USP15,IRAK3,LRP6,PRMT8,TMCC3,E2F7,ENSSSCG00000001516,ZNF318,PEAK1,PML,HCN4,NFKBIA,WARS1,TNFAIP3,TPD52L1,THBS1,ATL1,JAK2,PSAT1,TRAF1,LCN2,SETX,MTSS1,ANGPT1,SDCBP,OLFML2B,USF1,SLAMF7,SLAMF1,NTRK1,DPYD,EIF2AK2,ADRA2C,HTRA3,LYAR,SCARB2,ACOD1,MYCBP2,HMBOX1,P2RX7,ACTN2,FAS,XPNPEP1,ADRA2A,ENSSSCG00000011355,MX1,HCFC1,NAALADL1,ACSL6,ENSSSCG00000014670,TRIM68,TRIM21,NAMPT,TNFSF18,KYNU,T…
414	phosphatidylinositol phosphate binding	GO:1901981	GO:MF	152	828	19	ENSSSCG00000000217,ENSSSCG00000002298,ENSSSCG00000003137,ENSSSCG00000006071,ENSSSCG00000006237,ENSSSCG00000006307,ENSSSCG00000006619,ENSSSCG00000008239,ENSSSCG00000008768,ENSSSCG00000010144,ENSSSCG00000010604,ENSSSCG00000011853,ENSSSCG00000012403,ENSSSCG00000014820,ENSSSCG00000016794,ENSSSCG00000021383,ENSSSCG00000023351,ENSSSCG00000036828,ENSSSCG00000039947	RACGAP1,ZFYVE26,PLEKHA4,VPS13B,SDCBP,RCSD1,SNX27,CAPG,ARAP2,ACTN2,SH3PXD2A,RUBCN,OGT,FCHSD2,MYO10,CGAS,PLA2G4A,SNX4,KCNJ2
415	CXCR chemokine receptor binding	GO:0045236	GO:MF	11	828	5	ENSSSCG00000008953,ENSSSCG00000008978,ENSSSCG00000024759,ENSSSCG00000032474,ENSSSCG00000032777	CXCL8,CXCL11,CX3CL1,CXCL10,CXCL9
416	ribonucleoside triphosphate phosphatase activity	GO:0017111	GO:MF	569	828	47	ENSSSCG00000000186,ENSSSCG00000002639,ENSSSCG00000002671,ENSSSCG00000004830,ENSSSCG00000005020,ENSSSCG00000005423,ENSSSCG00000005983,ENSSSCG00000006550,ENSSSCG00000006890,ENSSSCG00000006923,ENSSSCG00000007789,ENSSSCG00000008051,ENSSSCG00000008812,ENSSSCG00000008835,ENSSSCG00000009683,ENSSSCG00000010540,ENSSSCG00000012055,ENSSSCG00000012076,ENSSSCG00000012077,ENSSSCG00000012325,ENSSSCG00000012713,…	RHEBL1,TUBB3,ATP2C2,ENSSSCG00000004830,ATL1,ABCA1,ATAD2,ATP8B2,ABCA4,GBP2,SRCAP,ABCA3,ATP10D,RASL11B,KIF13B,ENTPD7,MORC3,MX2,MX1,SMC1A,ATP11C,KIF18A,RAB30,IFIH1,ENSSSCG00000017146,DHX58,RAB20,RAB39B,GBP1,TAP2,TAP1,RAB8B,RFC2,SMCHD1,ENSSSCG00000030801,ENSSSCG00000031155,RHOQ,ARL5B,ATP2A2,ENSSSCG00000035428,RAB7B,RASL10B,RAB12,RND1,RAB19,RND3,GNAT1
417	guanyl nucleotide binding	GO:0019001	GO:MF	366	828	34	ENSSSCG00000000186,ENSSSCG00000002639,ENSSSCG00000003763,ENSSSCG00000005020,ENSSSCG00000006923,ENSSSCG00000008835,ENSSSCG00000012076,ENSSSCG00000012077,ENSSSCG00000014900,ENSSSCG00000016452,ENSSSCG00000020666,ENSSSCG00000021383,ENSSSCG00000022719,ENSSSCG00000024233,ENSSSCG00000024973,ENSSSCG00000026571,ENSSSCG00000027660,ENSSSCG00000027806,ENSSSCG00000030801,ENSSSCG00000031155,ENSSSCG00000031261,…	RHEBL1,TUBB3,IFI44,ATL1,GBP2,RASL11B,MX2,MX1,RAB30,GIMAP8,EHD4,CGAS,RAB20,RAB39B,GBP1,RAB8B,IFI44L,SAMHD1,ENSSSCG00000030801,ENSSSCG00000031155,RHOQ,ARL5B,ENSSSCG00000033089,ENSSSCG00000033909,ENSSSCG00000035428,RAB7B,RASL10B,ENSSSCG00000037735,RAB12,NME1,RND1,RAB19,RND3,GNAT1
418	GTP binding	GO:0005525	GO:MF	351	828	33	ENSSSCG00000000186,ENSSSCG00000002639,ENSSSCG00000003763,ENSSSCG00000005020,ENSSSCG00000006923,ENSSSCG00000008835,ENSSSCG00000012076,ENSSSCG00000012077,ENSSSCG00000014900,ENSSSCG00000016452,ENSSSCG00000020666,ENSSSCG00000021383,ENSSSCG00000022719,ENSSSCG00000024233,ENSSSCG00000024973,ENSSSCG00000026571,ENSSSCG00000027660,ENSSSCG00000030801,ENSSSCG00000031155,ENSSSCG00000031261,ENSSSCG00000031456,…	RHEBL1,TUBB3,IFI44,ATL1,GBP2,RASL11B,MX2,MX1,RAB30,GIMAP8,EHD4,CGAS,RAB20,RAB39B,GBP1,RAB8B,IFI44L,ENSSSCG00000030801,ENSSSCG00000031155,RHOQ,ARL5B,ENSSSCG00000033089,ENSSSCG00000033909,ENSSSCG00000035428,RAB7B,RASL10B,ENSSSCG00000037735,RAB12,NME1,RND1,RAB19,RND3,GNAT1
419	transition metal ion binding	GO:0046914	GO:MF	977	828	71	ENSSSCG00000000006,ENSSSCG00000000661,ENSSSCG00000001233,ENSSSCG00000001667,ENSSSCG00000001906,ENSSSCG00000001912,ENSSSCG00000001934,ENSSSCG00000002344,ENSSSCG00000003488,ENSSSCG00000003744,ENSSSCG00000004110,ENSSSCG00000004154,ENSSSCG00000004565,ENSSSCG00000005268,ENSSSCG00000005385,ENSSSCG00000005511,ENSSSCG00000005638,ENSSSCG00000006169,ENSSSCG00000006289,ENSSSCG00000007463,ENSSSCG00000008292,…	PPARA,PHC1,TRIM26,ZNF318,CYP1A1,PML,ENSSSCG00000001934,RIOX1,UBR4,MOCOS,TAB2,TNFAIP3,CA12,RORB,NR4A3,TRAF1,LCN2,ZFHX4,F5,PTGIS,TET3,HHIP,MYCBP2,TLL2,XPNPEP1,PRICKLE2,MELTF,MORC3,TIMP1,ZMAT1,NAALADL1,ZSWIM4,ERAP1,DCP2,SEC24A,ENSSSCG00000014670,TRIM68,TRIM21,CHORDC1,ANKIB1,IFIH1,AOC1,ENSSSCG00000017181,MARCHF10,DHX58,NPEPPS,MMP25,CA4,ENSSSCG00000023320,LAP3,CYP4F22,MT3,RNF19B,RORC,SAMHD1,SOD3,CAD,Z…
420	hydrolase activity	GO:0016787	GO:MF	2229	828	139	ENSSSCG00000000186,ENSSSCG00000000457,ENSSSCG00000000774,ENSSSCG00000001463,ENSSSCG00000001888,ENSSSCG00000002469,ENSSSCG00000002470,ENSSSCG00000002639,ENSSSCG00000002671,ENSSSCG00000002841,ENSSSCG00000003651,ENSSSCG00000003805,ENSSSCG00000004154,ENSSSCG00000004224,ENSSSCG00000004509,ENSSSCG00000004569,ENSSSCG00000004830,ENSSSCG00000004870,ENSSSCG00000005020,ENSSSCG00000005423,ENSSSCG00000005935,…	RHEBL1,USP15,USP18,PSMB9,RPP25,OTUB2,DDX24,TUBB3,ATP2C2,N4BP1,RHBDL2,PDE4B,TNFAIP3,HDDC2,LIPG,LACTB,ENSSSCG00000004830,CNDP2,ATL1,ABCA1,AGO2,ATAD2,VCPIP1,ADAR,ATP8B2,CTSS,ACP6,CDC14A,ABCA4,GBP2,ENSSSCG00000006932,CLCA1,ZBP1,SRCAP,ABCA3,USP34,HTRA3,ATP10D,RASL11B,OTUD4,PRSS12,KIF13B,PPTC7,UNG,PPA1,TLL2,ENTPD7,XPNPEP1,PFKFB3,NGLY1,PDE12,HMCES,XRN1,MORC3,MX2,MX1,SMC1A,ATP11C,MTMR1,NAALADL1,KIF18A,CF…
421	TAP binding	GO:0046977	GO:MF	3	828	3	ENSSSCG00000001507,ENSSSCG00000025593,ENSSSCG00000025618	TAPBP,TAP2,TAP1
422	alpha2-adrenergic receptor activity	GO:0004938	GO:MF	3	828	3	ENSSSCG00000008122,ENSSSCG00000008703,ENSSSCG00000010629	ADRA2B,ADRA2C,ADRA2A
423	TAP1 binding	GO:0046978	GO:MF	3	828	3	ENSSSCG00000001507,ENSSSCG00000025593,ENSSSCG00000025618	TAPBP,TAP2,TAP1
424	CXCR3 chemokine receptor binding	GO:0048248	GO:MF	3	828	3	ENSSSCG00000008978,ENSSSCG00000032474,ENSSSCG00000032777	CXCL11,CXCL10,CXCL9
425	Fever	HP:0001945	HP	385	271	48	ENSSSCG00000000148,ENSSSCG00000000396,ENSSSCG00000001229,ENSSSCG00000001398,ENSSSCG00000001463,ENSSSCG00000001595,ENSSSCG00000001912,ENSSSCG00000004125,ENSSSCG00000004154,ENSSSCG00000005215,ENSSSCG00000006289,ENSSSCG00000006464,ENSSSCG00000006543,ENSSSCG00000007901,ENSSSCG00000008388,ENSSSCG00000009216,ENSSSCG00000009229,ENSSSCG00000010448,ENSSSCG00000010504,ENSSSCG00000011214,ENSSSCG00000011239,…	ENSSSCG00000000148,STAT2,ENSSSCG00000001229,ENSSSCG00000001398,PSMB9,DAAM2,PML,STX11,TNFAIP3,JAK2,F5,NTRK1,ADAR,CIITA,REL,SPP1,ARHGAP24,FAS,BLNK,NGLY1,TRANK1,BCOR,UNC93B1,ERAP1,IFIH1,STAT1,LIFR,SLC41A1,IL6,PRKCD,TRPC6,RNASEH2B,TICAM1,PSMB8,BIRC3,SAMHD1,ZBTB16,ZNFX1,STK4,ALPK1,ENSSSCG00000032067,IRF8,PMP22,LPIN2,ENSSSCG00000039706,TH,GPR35,AP1S3
426	Abnormality of immune serum protein physiology	HP:0011111	HP	40	271	12	ENSSSCG00000001952,ENSSSCG00000004125,ENSSSCG00000006543,ENSSSCG00000010448,ENSSSCG00000015897,ENSSSCG00000016057,ENSSSCG00000016261,ENSSSCG00000023503,ENSSSCG00000024385,ENSSSCG00000026940,ENSSSCG00000026951,ENSSSCG00000027806	NFKBIA,STX11,ADAR,FAS,IFIH1,STAT1,SP110,PRKCD,RNASEH2B,CASP10,PSMB8,SAMHD1
427	Stomatitis	HP:0010280	HP	72	271	16	ENSSSCG00000001229,ENSSSCG00000001398,ENSSSCG00000001912,ENSSSCG00000002002,ENSSSCG00000010448,ENSSSCG00000012241,ENSSSCG00000014171,ENSSSCG00000015673,ENSSSCG00000020970,ENSSSCG00000023503,ENSSSCG00000024771,ENSSSCG00000026427,ENSSSCG00000026940,ENSSSCG00000028004,ENSSSCG00000030095,ENSSSCG00000030820	ENSSSCG00000001229,ENSSSCG00000001398,PML,IRF9,FAS,BCOR,ERAP1,KYNU,IL6,PRKCD,TICAM1,RORC,CASP10,ENSSSCG00000028004,ZBTB16,STK4
428	Abnormality of serum cytokine level	HP:0011112	HP	39	271	11	ENSSSCG00000004125,ENSSSCG00000006543,ENSSSCG00000010448,ENSSSCG00000015897,ENSSSCG00000016057,ENSSSCG00000016261,ENSSSCG00000023503,ENSSSCG00000024385,ENSSSCG00000026940,ENSSSCG00000026951,ENSSSCG00000027806	STX11,ADAR,FAS,IFIH1,STAT1,SP110,PRKCD,RNASEH2B,CASP10,PSMB8,SAMHD1
429	Panniculitis	HP:0012490	HP	26	271	9	ENSSSCG00000001463,ENSSSCG00000006543,ENSSSCG00000010448,ENSSSCG00000015897,ENSSSCG00000023503,ENSSSCG00000024385,ENSSSCG00000026940,ENSSSCG00000026951,ENSSSCG00000027806	PSMB9,ADAR,FAS,IFIH1,PRKCD,RNASEH2B,CASP10,PSMB8,SAMHD1
430	Recurrent fever	HP:0001954	HP	83	271	16	ENSSSCG00000000396,ENSSSCG00000001463,ENSSSCG00000004125,ENSSSCG00000004154,ENSSSCG00000006464,ENSSSCG00000008388,ENSSSCG00000015897,ENSSSCG00000016850,ENSSSCG00000020783,ENSSSCG00000023503,ENSSSCG00000026951,ENSSSCG00000030108,ENSSSCG00000030820,ENSSSCG00000031348,ENSSSCG00000037832,ENSSSCG00000038494	STAT2,PSMB9,STX11,TNFAIP3,NTRK1,REL,IFIH1,LIFR,SLC41A1,PRKCD,PSMB8,ZNFX1,STK4,ALPK1,PMP22,LPIN2
431	Abnormality of temperature regulation	HP:0004370	HP	505	271	51	ENSSSCG00000000148,ENSSSCG00000000396,ENSSSCG00000001229,ENSSSCG00000001398,ENSSSCG00000001463,ENSSSCG00000001595,ENSSSCG00000001912,ENSSSCG00000001952,ENSSSCG00000004125,ENSSSCG00000004154,ENSSSCG00000005215,ENSSSCG00000006289,ENSSSCG00000006464,ENSSSCG00000006543,ENSSSCG00000007901,ENSSSCG00000008388,ENSSSCG00000009216,ENSSSCG00000009229,ENSSSCG00000010448,ENSSSCG00000010504,ENSSSCG00000011214,…	ENSSSCG00000000148,STAT2,ENSSSCG00000001229,ENSSSCG00000001398,PSMB9,DAAM2,PML,NFKBIA,STX11,TNFAIP3,JAK2,F5,NTRK1,ADAR,CIITA,REL,SPP1,ARHGAP24,FAS,BLNK,NGLY1,TRANK1,BCOR,SMC1A,UNC93B1,ERAP1,IFIH1,STAT1,LIFR,SLC41A1,IL6,PRKCD,TRPC6,RNASEH2B,TICAM1,PSMB8,BIRC3,SAMHD1,ZBTB16,ZNFX1,STK4,ALPK1,ENSSSCG00000032067,IRF8,PMP22,TRAF6,LPIN2,ENSSSCG00000039706,TH,GPR35,AP1S3
432	Abnormal leukocyte count	HP:0011893	HP	465	271	48	ENSSSCG00000000396,ENSSSCG00000001463,ENSSSCG00000001912,ENSSSCG00000001952,ENSSSCG00000002283,ENSSSCG00000003419,ENSSSCG00000004125,ENSSSCG00000004154,ENSSSCG00000004687,ENSSSCG00000005215,ENSSSCG00000006071,ENSSSCG00000007901,ENSSSCG00000008357,ENSSSCG00000008388,ENSSSCG00000008980,ENSSSCG00000009216,ENSSSCG00000010278,ENSSSCG00000010448,ENSSSCG00000010504,ENSSSCG00000010580,ENSSSCG00000010605,…	STAT2,PSMB9,PML,NFKBIA,FUT8,MAD2L2,STX11,TNFAIP3,ENSSSCG00000004687,JAK2,VPS13B,CIITA,SPRED2,REL,SCARB2,SPP1,ENSSSCG00000010278,FAS,BLNK,NFKB2,STN1,EOGT,BCOR,UNC93B1,AP3B1,IFIH1,STAT1,SP110,TBX21,PDGFRB,PRKCD,RNASEH2B,TICAM1,LMNB2,CASP10,SAMD9,SOCS1,ZBTB16,ZNFX1,STK4,ENSSSCG00000032067,ACP5,IRF8,ATP6AP1,LPIN2,AP1S3,HEATR3,OAS1
433	Abnormal lymph node morphology	HP:0002733	HP	249	271	31	ENSSSCG00000000396,ENSSSCG00000001229,ENSSSCG00000001398,ENSSSCG00000001463,ENSSSCG00000001509,ENSSSCG00000001912,ENSSSCG00000001952,ENSSSCG00000004125,ENSSSCG00000004154,ENSSSCG00000005215,ENSSSCG00000005423,ENSSSCG00000009216,ENSSSCG00000009938,ENSSSCG00000010448,ENSSSCG00000010580,ENSSSCG00000012241,ENSSSCG00000014171,ENSSSCG00000015897,ENSSSCG00000016057,ENSSSCG00000016261,ENSSSCG00000020970,…	STAT2,ENSSSCG00000001229,ENSSSCG00000001398,PSMB9,DAXX,PML,NFKBIA,STX11,TNFAIP3,JAK2,ABCA1,SPP1,UNG,FAS,NFKB2,BCOR,ERAP1,IFIH1,STAT1,SP110,IL6,PRKCD,CASP10,PSMB8,BIRC3,SOCS1,ZBTB16,ZNFX1,ACP5,IRF8,ISG15
434	Leukocytosis	HP:0001974	HP	139	271	21	ENSSSCG00000000396,ENSSSCG00000001912,ENSSSCG00000001952,ENSSSCG00000005215,ENSSSCG00000008388,ENSSSCG00000010278,ENSSSCG00000010448,ENSSSCG00000012241,ENSSSCG00000012893,ENSSSCG00000017517,ENSSSCG00000022741,ENSSSCG00000023503,ENSSSCG00000024385,ENSSSCG00000024771,ENSSSCG00000026784,ENSSSCG00000026940,ENSSSCG00000030095,ENSSSCG00000034980,ENSSSCG00000038494,ENSSSCG00000040847,ENSSSCG00000046640	STAT2,PML,NFKBIA,JAK2,REL,ENSSSCG00000010278,FAS,BCOR,UNC93B1,TBX21,PDGFRB,PRKCD,RNASEH2B,TICAM1,LMNB2,CASP10,ZBTB16,IRF8,LPIN2,AP1S3,OAS1
435	Renal insufficiency	HP:0000083	HP	396	271	42	ENSSSCG00000000148,ENSSSCG00000000396,ENSSSCG00000000523,ENSSSCG00000001229,ENSSSCG00000001398,ENSSSCG00000001595,ENSSSCG00000002836,ENSSSCG00000003419,ENSSSCG00000003744,ENSSSCG00000004672,ENSSSCG00000004687,ENSSSCG00000006464,ENSSSCG00000007789,ENSSSCG00000008980,ENSSSCG00000009216,ENSSSCG00000009229,ENSSSCG00000010204,ENSSSCG00000010448,ENSSSCG00000011632,ENSSSCG00000012325,ENSSSCG00000014171,…	ENSSSCG00000000148,STAT2,BBS10,ENSSSCG00000001229,ENSSSCG00000001398,DAAM2,SALL1,MAD2L2,MOCOS,GATM,ENSSSCG00000004687,NTRK1,SRCAP,SCARB2,SPP1,ARHGAP24,BICC1,FAS,NPHP3,SMC1A,ERAP1,KYNU,COL4A4,PGAM2,NIPAL4,FAM20A,SLC41A1,SLC4A2,PRKCD,CYP4F22,TRPC6,CHRM3,CASP10,RFC2,ZNFX1,LIMK1,ACP5,HPRT1,SOX18,ENSSSCG00000039706,GPR35,AP1S3
436	Abnormal circulating interferon concentration	HP:0030354	HP	24	271	8	ENSSSCG00000004125,ENSSSCG00000006543,ENSSSCG00000015897,ENSSSCG00000016057,ENSSSCG00000016261,ENSSSCG00000024385,ENSSSCG00000026951,ENSSSCG00000027806	STX11,ADAR,IFIH1,STAT1,SP110,RNASEH2B,PSMB8,SAMHD1
437	Abnormal circulating interferon-gamma concentration	HP:0030355	HP	24	271	8	ENSSSCG00000004125,ENSSSCG00000006543,ENSSSCG00000015897,ENSSSCG00000016057,ENSSSCG00000016261,ENSSSCG00000024385,ENSSSCG00000026951,ENSSSCG00000027806	STX11,ADAR,IFIH1,STAT1,SP110,RNASEH2B,PSMB8,SAMHD1
438	NF-kappa B signaling pathway	KEGG:04064	KEGG	73	312	17	ENSSSCG00000001952,ENSSSCG00000004110,ENSSSCG00000004154,ENSSSCG00000005511,ENSSSCG00000008953,ENSSSCG00000008959,ENSSSCG00000009542,ENSSSCG00000010504,ENSSSCG00000010580,ENSSSCG00000013655,ENSSSCG00000015579,ENSSSCG00000016101,ENSSSCG00000017614,ENSSSCG00000022413,ENSSSCG00000024771,ENSSSCG00000032343,ENSSSCG00000038082	NFKBIA,TAB2,TNFAIP3,TRAF1,CXCL8,CXCL2,TNFSF13B,BLNK,NFKB2,ICAM1,PTGS2,CFLAR,TRIM25,TIRAP,TICAM1,CCL4,TRAF6
439	Influenza A	KEGG:05164	KEGG	118	312	21	ENSSSCG00000000396,ENSSSCG00000001516,ENSSSCG00000001912,ENSSSCG00000001952,ENSSSCG00000005215,ENSSSCG00000006543,ENSSSCG00000008496,ENSSSCG00000008953,ENSSSCG00000009881,ENSSSCG00000010448,ENSSSCG00000012077,ENSSSCG00000012853,ENSSSCG00000013655,ENSSSCG00000015897,ENSSSCG00000016057,ENSSSCG00000017614,ENSSSCG00000020906,ENSSSCG00000020970,ENSSSCG00000024771,ENSSSCG00000029005,ENSSSCG00000032474	STAT2,ENSSSCG00000001516,PML,NFKBIA,JAK2,ADAR,EIF2AK2,CXCL8,OAS2,FAS,MX1,IRF7,ICAM1,IFIH1,STAT1,TRIM25,GHSR,IL6,TICAM1,KPNA2,CXCL10
440	NOD-like receptor signaling pathway	KEGG:04621	KEGG	130	312	21	ENSSSCG00000000396,ENSSSCG00000001952,ENSSSCG00000004110,ENSSSCG00000004154,ENSSSCG00000008953,ENSSSCG00000008959,ENSSSCG00000009817,ENSSSCG00000009881,ENSSSCG00000012853,ENSSSCG00000015435,ENSSSCG00000016057,ENSSSCG00000018032,ENSSSCG00000020970,ENSSSCG00000023503,ENSSSCG00000024096,ENSSSCG00000024771,ENSSSCG00000024973,ENSSSCG00000027555,ENSSSCG00000032360,ENSSSCG00000038082,ENSSSCG00000038774	STAT2,NFKBIA,TAB2,TNFAIP3,CXCL8,CXCL2,P2RX7,OAS2,IRF7,NAMPT,STAT1,TRPV2,IL6,PRKCD,RIPK2,TICAM1,GBP1,DEFB1,PANX1,TRAF6,MAPK13
441	IL-17 signaling pathway	KEGG:04657	KEGG	67	312	14	ENSSSCG00000001952,ENSSSCG00000004110,ENSSSCG00000004154,ENSSSCG00000004624,ENSSSCG00000005638,ENSSSCG00000008953,ENSSSCG00000008959,ENSSSCG00000015579,ENSSSCG00000020970,ENSSSCG00000025308,ENSSSCG00000027555,ENSSSCG00000032474,ENSSSCG00000038082,ENSSSCG00000038774	NFKBIA,TAB2,TNFAIP3,MAPK6,LCN2,CXCL8,CXCL2,PTGS2,IL6,IL17D,DEFB1,CXCL10,TRAF6,MAPK13
442	Toll-like receptor signaling pathway	KEGG:04620	KEGG	77	312	15	ENSSSCG00000001952,ENSSSCG00000004110,ENSSSCG00000008953,ENSSSCG00000008978,ENSSSCG00000009216,ENSSSCG00000012853,ENSSSCG00000016057,ENSSSCG00000020970,ENSSSCG00000022413,ENSSSCG00000024771,ENSSSCG00000032343,ENSSSCG00000032474,ENSSSCG00000032777,ENSSSCG00000038082,ENSSSCG00000038774	NFKBIA,TAB2,CXCL8,CXCL11,SPP1,IRF7,STAT1,IL6,TIRAP,TICAM1,CCL4,CXCL10,CXCL9,TRAF6,MAPK13
443	TNF signaling pathway	KEGG:04668	KEGG	90	312	16	ENSSSCG00000001952,ENSSSCG00000002716,ENSSSCG00000004110,ENSSSCG00000004154,ENSSSCG00000005511,ENSSSCG00000008959,ENSSSCG00000010448,ENSSSCG00000013655,ENSSSCG00000014277,ENSSSCG00000015579,ENSSSCG00000016101,ENSSSCG00000020970,ENSSSCG00000026940,ENSSSCG00000032408,ENSSSCG00000032474,ENSSSCG00000038774	NFKBIA,MLKL,TAB2,TNFAIP3,TRAF1,CXCL2,FAS,ICAM1,IRF1,PTGS2,CFLAR,IL6,CASP10,CASP7,CXCL10,MAPK13
444	Epstein-Barr virus infection	KEGG:05169	KEGG	150	312	21	ENSSSCG00000000396,ENSSSCG00000001398,ENSSSCG00000001507,ENSSSCG00000001516,ENSSSCG00000001952,ENSSSCG00000004110,ENSSSCG00000004154,ENSSSCG00000004687,ENSSSCG00000008496,ENSSSCG00000009881,ENSSSCG00000010448,ENSSSCG00000010504,ENSSSCG00000010580,ENSSSCG00000012853,ENSSSCG00000013655,ENSSSCG00000016057,ENSSSCG00000020970,ENSSSCG00000032474,ENSSSCG00000038082,ENSSSCG00000038774,ENSSSCG00000040575	STAT2,ENSSSCG00000001398,TAPBP,ENSSSCG00000001516,NFKBIA,TAB2,TNFAIP3,ENSSSCG00000004687,EIF2AK2,OAS2,FAS,BLNK,NFKB2,IRF7,ICAM1,STAT1,IL6,CXCL10,TRAF6,MAPK13,ISG15
445	RIG-I-like receptor signaling pathway	KEGG:04622	KEGG	58	312	12	ENSSSCG00000001952,ENSSSCG00000006543,ENSSSCG00000008953,ENSSSCG00000012853,ENSSSCG00000015897,ENSSSCG00000017416,ENSSSCG00000017614,ENSSSCG00000026940,ENSSSCG00000032474,ENSSSCG00000038082,ENSSSCG00000038774,ENSSSCG00000040575	NFKBIA,ADAR,CXCL8,IRF7,IFIH1,DHX58,TRIM25,CASP10,CXCL10,TRAF6,MAPK13,ISG15
446	Viral protein interaction with cytokine and cytokine receptor	KEGG:04061	KEGG	61	312	12	ENSSSCG00000008953,ENSSSCG00000008959,ENSSSCG00000008978,ENSSSCG00000014310,ENSSSCG00000017466,ENSSSCG00000020906,ENSSSCG00000020970,ENSSSCG00000032343,ENSSSCG00000032474,ENSSSCG00000032777,ENSSSCG00000035736,ENSSSCG00000040648	CXCL8,CXCL2,CXCL11,CXCL14,CCR7,GHSR,IL6,CCL4,CXCL10,CXCL9,ENSSSCG00000035736,CCL8
447	Herpes simplex virus 1 infection	KEGG:05168	KEGG	240	312	27	ENSSSCG00000000396,ENSSSCG00000001398,ENSSSCG00000001507,ENSSSCG00000001509,ENSSSCG00000001516,ENSSSCG00000001912,ENSSSCG00000001952,ENSSSCG00000003241,ENSSSCG00000004110,ENSSSCG00000004687,ENSSSCG00000005215,ENSSSCG00000008496,ENSSSCG00000009881,ENSSSCG00000010448,ENSSSCG00000012264,ENSSSCG00000012853,ENSSSCG00000013469,ENSSSCG00000015897,ENSSSCG00000016057,ENSSSCG00000016263,ENSSSCG00000020970,…	STAT2,ENSSSCG00000001398,TAPBP,DAXX,ENSSSCG00000001516,PML,NFKBIA,ZNF614,TAB2,ENSSSCG00000004687,JAK2,EIF2AK2,OAS2,FAS,ENSSSCG00000012264,IRF7,ZNF555,IFIH1,STAT1,ENSSSCG00000016263,IL6,CGAS,TICAM1,ENSSSCG00000033232,ENSSSCG00000036877,ZNF248,TRAF6
448	Measles	KEGG:05162	KEGG	106	312	16	ENSSSCG00000000396,ENSSSCG00000001516,ENSSSCG00000001952,ENSSSCG00000003112,ENSSSCG00000004110,ENSSSCG00000004154,ENSSSCG00000006543,ENSSSCG00000008496,ENSSSCG00000009881,ENSSSCG00000010448,ENSSSCG00000012077,ENSSSCG00000012853,ENSSSCG00000015897,ENSSSCG00000016057,ENSSSCG00000020970,ENSSSCG00000038082	STAT2,ENSSSCG00000001516,NFKBIA,BBC3,TAB2,TNFAIP3,ADAR,EIF2AK2,OAS2,FAS,MX1,IRF7,IFIH1,STAT1,IL6,TRAF6
449	Human papillomavirus infection	KEGG:05165	KEGG	242	312	26	ENSSSCG00000000396,ENSSSCG00000001398,ENSSSCG00000001516,ENSSSCG00000003488,ENSSSCG00000004789,ENSSSCG00000005494,ENSSSCG00000007331,ENSSSCG00000008496,ENSSSCG00000009216,ENSSSCG00000009921,ENSSSCG00000010448,ENSSSCG00000012077,ENSSSCG00000012375,ENSSSCG00000013016,ENSSSCG00000014277,ENSSSCG00000015579,ENSSSCG00000016057,ENSSSCG00000016140,ENSSSCG00000024771,ENSSSCG00000025689,ENSSSCG00000035420,…	STAT2,ENSSSCG00000001398,ENSSSCG00000001516,UBR4,THBS1,TNC,RBL1,EIF2AK2,SPP1,OASL,FAS,MX1,DLG3,PPP2R5B,IRF1,PTGS2,STAT1,FZD5,TICAM1,DVL2,HES4,WNT5A,ATP6AP1,HEYL,ISG15,LLGL1
450	Lipid and atherosclerosis	KEGG:05417	KEGG	156	312	19	ENSSSCG00000001906,ENSSSCG00000001952,ENSSSCG00000004110,ENSSSCG00000005215,ENSSSCG00000005423,ENSSSCG00000008629,ENSSSCG00000008953,ENSSSCG00000008959,ENSSSCG00000010448,ENSSSCG00000012853,ENSSSCG00000013655,ENSSSCG00000016450,ENSSSCG00000020906,ENSSSCG00000020970,ENSSSCG00000022413,ENSSSCG00000024771,ENSSSCG00000032408,ENSSSCG00000038082,ENSSSCG00000038774	CYP1A1,NFKBIA,TAB2,JAK2,ABCA1,ROCK2,CXCL8,CXCL2,FAS,IRF7,ICAM1,NOS3,GHSR,IL6,TIRAP,TICAM1,CASP7,TRAF6,MAPK13
451	Interferon Signaling	REAC:R-SSC-913531	REAC	48	400	16	ENSSSCG00000000396,ENSSSCG00000002002,ENSSSCG00000003512,ENSSSCG00000005215,ENSSSCG00000008496,ENSSSCG00000009921,ENSSSCG00000011465,ENSSSCG00000012077,ENSSSCG00000015549,ENSSSCG00000016057,ENSSSCG00000017614,ENSSSCG00000023379,ENSSSCG00000023503,ENSSSCG00000027855,ENSSSCG00000030548,ENSSSCG00000040575	STAT2,IRF9,EIF4G3,JAK2,EIF2AK2,OASL,PDE12,MX1,RNASEL,STAT1,TRIM25,UBE2L6,PRKCD,SOCS1,HERC5,ISG15
452	Antiviral mechanism by IFN-stimulated genes	REAC:R-SSC-1169410	REAC	26	400	11	ENSSSCG00000003512,ENSSSCG00000008496,ENSSSCG00000009921,ENSSSCG00000011465,ENSSSCG00000012077,ENSSSCG00000015549,ENSSSCG00000016057,ENSSSCG00000017614,ENSSSCG00000023379,ENSSSCG00000030548,ENSSSCG00000040575	EIF4G3,EIF2AK2,OASL,PDE12,MX1,RNASEL,STAT1,TRIM25,UBE2L6,HERC5,ISG15
453	ISG15 antiviral mechanism	REAC:R-SSC-1169408	REAC	23	400	8	ENSSSCG00000003512,ENSSSCG00000008496,ENSSSCG00000012077,ENSSSCG00000016057,ENSSSCG00000017614,ENSSSCG00000023379,ENSSSCG00000030548,ENSSSCG00000040575	EIF4G3,EIF2AK2,MX1,STAT1,TRIM25,UBE2L6,HERC5,ISG15
454	Negative regulators of DDX58/IFIH1 signaling	REAC:R-SSC-936440	REAC	10	400	5	ENSSSCG00000004154,ENSSSCG00000023379,ENSSSCG00000030548,ENSSSCG00000040286,ENSSSCG00000040575	TNFAIP3,UBE2L6,HERC5,CYLD,ISG15

## Sheet: PP vs. CtrP
Results of Gene Ontology analysis of differentially expressed genes identified after treatment of the porcine myometrium on days 14-15 of pregnancy with PPARγ agonist pioglitazone vs. control
	term_name	term_id	source	term_size	query_size	intersection_size	intersection	gene_names
1	defense response to virus	GO:0051607	GO:BP	249	6	4	ENSSSCG00000004154,ENSSSCG00000010451,ENSSSCG00000010454,ENSSSCG00000014987	TNFAIP3,IFIT2,IFIT5,MMP12
2	defense response to symbiont	GO:0140546	GO:BP	249	6	4	ENSSSCG00000004154,ENSSSCG00000010451,ENSSSCG00000010454,ENSSSCG00000014987	TNFAIP3,IFIT2,IFIT5,MMP12
3	response to virus	GO:0009615	GO:BP	313	6	4	ENSSSCG00000004154,ENSSSCG00000010451,ENSSSCG00000010454,ENSSSCG00000014987	TNFAIP3,IFIT2,IFIT5,MMP12
4	response to other organism	GO:0051707	GO:BP	1121	6	5	ENSSSCG00000004154,ENSSSCG00000010451,ENSSSCG00000010454,ENSSSCG00000014987,ENSSSCG00000027607	TNFAIP3,IFIT2,IFIT5,MMP12,IER3
5	response to external biotic stimulus	GO:0043207	GO:BP	1124	6	5	ENSSSCG00000004154,ENSSSCG00000010451,ENSSSCG00000010454,ENSSSCG00000014987,ENSSSCG00000027607	TNFAIP3,IFIT2,IFIT5,MMP12,IER3
6	response to biotic stimulus	GO:0009607	GO:BP	1156	6	5	ENSSSCG00000004154,ENSSSCG00000010451,ENSSSCG00000010454,ENSSSCG00000014987,ENSSSCG00000027607	TNFAIP3,IFIT2,IFIT5,MMP12,IER3
7	biological process involved in interspecies interaction between organisms	GO:0044419	GO:BP	1248	6	5	ENSSSCG00000004154,ENSSSCG00000010451,ENSSSCG00000010454,ENSSSCG00000014987,ENSSSCG00000027607	TNFAIP3,IFIT2,IFIT5,MMP12,IER3
8	defense response	GO:0006952	GO:BP	1296	6	5	ENSSSCG00000004154,ENSSSCG00000010451,ENSSSCG00000010454,ENSSSCG00000014987,ENSSSCG00000027607	TNFAIP3,IFIT2,IFIT5,MMP12,IER3
9	negative regulation of defense response	GO:0031348	GO:BP	200	6	3	ENSSSCG00000004154,ENSSSCG00000014987,ENSSSCG00000027607	TNFAIP3,MMP12,IER3
10	response to external stimulus	GO:0009605	GO:BP	1949	6	5	ENSSSCG00000004154,ENSSSCG00000010451,ENSSSCG00000010454,ENSSSCG00000014987,ENSSSCG00000027607	TNFAIP3,IFIT2,IFIT5,MMP12,IER3

## Sheet: PC vs. CtrC
Results of Gene Ontology, KEEG and REAC enrichment analyses of differentially expressed genes identified after treatment of the porcine myometrium on days 14-15 of the estrous cycle with PPARγ agonist pioglitazone vs. control
	term_name	term_id	source	term_size	query_size	intersection_size	intersection	gene_names
1	cell chemotaxis	GO:0060326	GO:BP	229	4	3	ENSSSCG00000008953,ENSSSCG00000008957,ENSSSCG00000008959	CXCL8,AMCF-II,CXCL2
2	neutrophil activation	GO:0042119	GO:BP	28	4	2	ENSSSCG00000008953,ENSSSCG00000008957	CXCL8,AMCF-II
3	granulocyte activation	GO:0036230	GO:BP	34	4	2	ENSSSCG00000008953,ENSSSCG00000008957	CXCL8,AMCF-II
4	chemotaxis	GO:0006935	GO:BP	330	4	3	ENSSSCG00000008953,ENSSSCG00000008957,ENSSSCG00000008959	CXCL8,AMCF-II,CXCL2
5	taxis	GO:0042330	GO:BP	332	4	3	ENSSSCG00000008953,ENSSSCG00000008957,ENSSSCG00000008959	CXCL8,AMCF-II,CXCL2
6	immune response	GO:0006955	GO:BP	1292	4	4	ENSSSCG00000008953,ENSSSCG00000008957,ENSSSCG00000008959,ENSSSCG00000017488	CXCL8,AMCF-II,CXCL2,CSF3
7	antimicrobial humoral immune response mediated by antimicrobial peptide	GO:0061844	GO:BP	43	4	2	ENSSSCG00000008953,ENSSSCG00000008957	CXCL8,AMCF-II
8	antimicrobial humoral response	GO:0019730	GO:BP	70	4	2	ENSSSCG00000008953,ENSSSCG00000008957	CXCL8,AMCF-II
9	neutrophil chemotaxis	GO:0030593	GO:BP	71	4	2	ENSSSCG00000008953,ENSSSCG00000008957	CXCL8,AMCF-II
10	chemokine-mediated signaling pathway	GO:0070098	GO:BP	73	4	2	ENSSSCG00000008953,ENSSSCG00000008957	CXCL8,AMCF-II
11	extracellular space	GO:0005615	GO:CC	1185	4	4	ENSSSCG00000008953,ENSSSCG00000008957,ENSSSCG00000008959,ENSSSCG00000017488	CXCL8,AMCF-II,CXCL2,CSF3
12	extracellular region	GO:0005576	GO:CC	1637	4	4	ENSSSCG00000008953,ENSSSCG00000008957,ENSSSCG00000008959,ENSSSCG00000017488	CXCL8,AMCF-II,CXCL2,CSF3
13	cytokine activity	GO:0005125	GO:MF	199	4	4	ENSSSCG00000008953,ENSSSCG00000008957,ENSSSCG00000008959,ENSSSCG00000017488	CXCL8,AMCF-II,CXCL2,CSF3
14	cytokine receptor binding	GO:0005126	GO:MF	233	4	4	ENSSSCG00000008953,ENSSSCG00000008957,ENSSSCG00000008959,ENSSSCG00000017488	CXCL8,AMCF-II,CXCL2,CSF3
15	chemokine activity	GO:0008009	GO:MF	39	4	3	ENSSSCG00000008953,ENSSSCG00000008957,ENSSSCG00000008959	CXCL8,AMCF-II,CXCL2
16	chemokine receptor binding	GO:0042379	GO:MF	54	4	3	ENSSSCG00000008953,ENSSSCG00000008957,ENSSSCG00000008959	CXCL8,AMCF-II,CXCL2
17	receptor ligand activity	GO:0048018	GO:MF	415	4	4	ENSSSCG00000008953,ENSSSCG00000008957,ENSSSCG00000008959,ENSSSCG00000017488	CXCL8,AMCF-II,CXCL2,CSF3
18	signaling receptor activator activity	GO:0030546	GO:MF	421	4	4	ENSSSCG00000008953,ENSSSCG00000008957,ENSSSCG00000008959,ENSSSCG00000017488	CXCL8,AMCF-II,CXCL2,CSF3
19	signaling receptor regulator activity	GO:0030545	GO:MF	447	4	4	ENSSSCG00000008953,ENSSSCG00000008957,ENSSSCG00000008959,ENSSSCG00000017488	CXCL8,AMCF-II,CXCL2,CSF3
20	CXCR chemokine receptor binding	GO:0045236	GO:MF	11	4	2	ENSSSCG00000008953,ENSSSCG00000008957	CXCL8,AMCF-II
21	molecular function activator activity	GO:0140677	GO:MF	930	4	4	ENSSSCG00000008953,ENSSSCG00000008957,ENSSSCG00000008959,ENSSSCG00000017488	CXCL8,AMCF-II,CXCL2,CSF3
22	G protein-coupled receptor binding	GO:0001664	GO:MF	230	4	3	ENSSSCG00000008953,ENSSSCG00000008957,ENSSSCG00000008959	CXCL8,AMCF-II,CXCL2
23	signaling receptor binding	GO:0005102	GO:MF	1134	4	4	ENSSSCG00000008953,ENSSSCG00000008957,ENSSSCG00000008959,ENSSSCG00000017488	CXCL8,AMCF-II,CXCL2,CSF3
24	molecular function regulator activity	GO:0098772	GO:MF	1674	4	4	ENSSSCG00000008953,ENSSSCG00000008957,ENSSSCG00000008959,ENSSSCG00000017488	CXCL8,AMCF-II,CXCL2,CSF3
25	granulocyte colony-stimulating factor receptor binding	GO:0005130	GO:MF	1	4	1	ENSSSCG00000017488	CSF3
26	Viral protein interaction with cytokine and cytokine receptor	KEGG:04061	KEGG	61	3	3	ENSSSCG00000008953,ENSSSCG00000008957,ENSSSCG00000008959	CXCL8,AMCF-II,CXCL2
27	Rheumatoid arthritis	KEGG:05323	KEGG	65	3	3	ENSSSCG00000008953,ENSSSCG00000008957,ENSSSCG00000008959	CXCL8,AMCF-II,CXCL2
28	IL-17 signaling pathway	KEGG:04657	KEGG	67	3	3	ENSSSCG00000008953,ENSSSCG00000008957,ENSSSCG00000008959	CXCL8,AMCF-II,CXCL2
29	Chemokine signaling pathway	KEGG:04062	KEGG	144	3	3	ENSSSCG00000008953,ENSSSCG00000008957,ENSSSCG00000008959	CXCL8,AMCF-II,CXCL2
30	Cytokine-cytokine receptor interaction	KEGG:04060	KEGG	188	3	3	ENSSSCG00000008953,ENSSSCG00000008957,ENSSSCG00000008959	CXCL8,AMCF-II,CXCL2
31	Legionellosis	KEGG:05134	KEGG	38	3	2	ENSSSCG00000008953,ENSSSCG00000008959	CXCL8,CXCL2
32	Pertussis	KEGG:05133	KEGG	58	3	2	ENSSSCG00000008953,ENSSSCG00000008957	CXCL8,AMCF-II
33	Amoebiasis	KEGG:05146	KEGG	67	3	2	ENSSSCG00000008953,ENSSSCG00000008959	CXCL8,CXCL2
34	NF-kappa B signaling pathway	KEGG:04064	KEGG	73	3	2	ENSSSCG00000008953,ENSSSCG00000008959	CXCL8,CXCL2
35	TNF signaling pathway	KEGG:04668	KEGG	90	3	2	ENSSSCG00000008957,ENSSSCG00000008959	AMCF-II,CXCL2
36	Alcoholic liver disease	KEGG:04936	KEGG	96	3	2	ENSSSCG00000008953,ENSSSCG00000008959	CXCL8,CXCL2
37	Chemokine receptors bind chemokines	REAC:R-SSC-380108	REAC	39	3	2	ENSSSCG00000008953,ENSSSCG00000008957	CXCL8,AMCF-II

## Sheet: TP vs. CtrP
Results of Gene Ontology, KEEG and REAC enrichment analyses of differentially expressed genes identified after treatment of the porcine myometrium on days 14-15 of pregnancy with PPARγ antagonist T0070907 vs. control
	term_name	term_id	source	term_size	query_size	intersection_size	intersection	gene_names
1	defense response to virus	GO:0051607	GO:BP	249	71	14	ENSSSCG00000000774,ENSSSCG00000008648,ENSSSCG00000010451,ENSSSCG00000010452,ENSSSCG00000010454,ENSSSCG00000012076,ENSSSCG00000012077,ENSSSCG00000014987,ENSSSCG00000017416,ENSSSCG00000030548,ENSSSCG00000034570,ENSSSCG00000038912,ENSSSCG00000039300,ENSSSCG00000040575	USP18,RSAD2,IFIT2,IFIT1,IFIT5,MX2,MX1,MMP12,DHX58,HERC5,IFI6,ENSSSCG00000038912,IL27,ISG15
2	defense response to symbiont	GO:0140546	GO:BP	249	71	14	ENSSSCG00000000774,ENSSSCG00000008648,ENSSSCG00000010451,ENSSSCG00000010452,ENSSSCG00000010454,ENSSSCG00000012076,ENSSSCG00000012077,ENSSSCG00000014987,ENSSSCG00000017416,ENSSSCG00000030548,ENSSSCG00000034570,ENSSSCG00000038912,ENSSSCG00000039300,ENSSSCG00000040575	USP18,RSAD2,IFIT2,IFIT1,IFIT5,MX2,MX1,MMP12,DHX58,HERC5,IFI6,ENSSSCG00000038912,IL27,ISG15
3	response to virus	GO:0009615	GO:BP	313	71	15	ENSSSCG00000000774,ENSSSCG00000008648,ENSSSCG00000010451,ENSSSCG00000010452,ENSSSCG00000010454,ENSSSCG00000012076,ENSSSCG00000012077,ENSSSCG00000014987,ENSSSCG00000017416,ENSSSCG00000028964,ENSSSCG00000030548,ENSSSCG00000034570,ENSSSCG00000038912,ENSSSCG00000039300,ENSSSCG00000040575	USP18,RSAD2,IFIT2,IFIT1,IFIT5,MX2,MX1,MMP12,DHX58,PIM2,HERC5,IFI6,ENSSSCG00000038912,IL27,ISG15
4	response to other organism	GO:0051707	GO:BP	1121	71	24	ENSSSCG00000000774,ENSSSCG00000004195,ENSSSCG00000008647,ENSSSCG00000008648,ENSSSCG00000010451,ENSSSCG00000010452,ENSSSCG00000010454,ENSSSCG00000011928,ENSSSCG00000011951,ENSSSCG00000012076,ENSSSCG00000012077,ENSSSCG00000014987,ENSSSCG00000016450,ENSSSCG00000017416,ENSSSCG00000017705,ENSSSCG00000017755,ENSSSCG00000023247,ENSSSCG00000026602,ENSSSCG00000028964,ENSSSCG00000030548,ENSSSCG00000034570,…	USP18,ARG1,CMPK2,RSAD2,IFIT2,IFIT1,IFIT5,CCDC80,NFKBIZ,MX2,MX1,MMP12,NOS3,DHX58,CCL5,NOS2,OPTN,PTGIR,PIM2,HERC5,IFI6,ENSSSCG00000038912,IL27,ISG15
5	response to external biotic stimulus	GO:0043207	GO:BP	1124	71	24	ENSSSCG00000000774,ENSSSCG00000004195,ENSSSCG00000008647,ENSSSCG00000008648,ENSSSCG00000010451,ENSSSCG00000010452,ENSSSCG00000010454,ENSSSCG00000011928,ENSSSCG00000011951,ENSSSCG00000012076,ENSSSCG00000012077,ENSSSCG00000014987,ENSSSCG00000016450,ENSSSCG00000017416,ENSSSCG00000017705,ENSSSCG00000017755,ENSSSCG00000023247,ENSSSCG00000026602,ENSSSCG00000028964,ENSSSCG00000030548,ENSSSCG00000034570,…	USP18,ARG1,CMPK2,RSAD2,IFIT2,IFIT1,IFIT5,CCDC80,NFKBIZ,MX2,MX1,MMP12,NOS3,DHX58,CCL5,NOS2,OPTN,PTGIR,PIM2,HERC5,IFI6,ENSSSCG00000038912,IL27,ISG15
6	response to biotic stimulus	GO:0009607	GO:BP	1156	71	24	ENSSSCG00000000774,ENSSSCG00000004195,ENSSSCG00000008647,ENSSSCG00000008648,ENSSSCG00000010451,ENSSSCG00000010452,ENSSSCG00000010454,ENSSSCG00000011928,ENSSSCG00000011951,ENSSSCG00000012076,ENSSSCG00000012077,ENSSSCG00000014987,ENSSSCG00000016450,ENSSSCG00000017416,ENSSSCG00000017705,ENSSSCG00000017755,ENSSSCG00000023247,ENSSSCG00000026602,ENSSSCG00000028964,ENSSSCG00000030548,ENSSSCG00000034570,…	USP18,ARG1,CMPK2,RSAD2,IFIT2,IFIT1,IFIT5,CCDC80,NFKBIZ,MX2,MX1,MMP12,NOS3,DHX58,CCL5,NOS2,OPTN,PTGIR,PIM2,HERC5,IFI6,ENSSSCG00000038912,IL27,ISG15
7	defense response	GO:0006952	GO:BP	1296	71	25	ENSSSCG00000000774,ENSSSCG00000004195,ENSSSCG00000008648,ENSSSCG00000010451,ENSSSCG00000010452,ENSSSCG00000010454,ENSSSCG00000011453,ENSSSCG00000011951,ENSSSCG00000012076,ENSSSCG00000012077,ENSSSCG00000012277,ENSSSCG00000014987,ENSSSCG00000017402,ENSSSCG00000017416,ENSSSCG00000017705,ENSSSCG00000017755,ENSSSCG00000023247,ENSSSCG00000026602,ENSSSCG00000030548,ENSSSCG00000032795,ENSSSCG00000034570,…	USP18,ARG1,RSAD2,IFIT2,IFIT1,IFIT5,ITIH4,NFKBIZ,MX2,MX1,TIMP1,MMP12,STAT5A,DHX58,CCL5,NOS2,OPTN,PTGIR,HERC5,IL1RL1,IFI6,ENSSSCG00000037358,ENSSSCG00000038912,IL27,ISG15
8	biological process involved in interspecies interaction between organisms	GO:0044419	GO:BP	1248	71	24	ENSSSCG00000000774,ENSSSCG00000004195,ENSSSCG00000008647,ENSSSCG00000008648,ENSSSCG00000010451,ENSSSCG00000010452,ENSSSCG00000010454,ENSSSCG00000011928,ENSSSCG00000011951,ENSSSCG00000012076,ENSSSCG00000012077,ENSSSCG00000014987,ENSSSCG00000016450,ENSSSCG00000017416,ENSSSCG00000017705,ENSSSCG00000017755,ENSSSCG00000023247,ENSSSCG00000026602,ENSSSCG00000028964,ENSSSCG00000030548,ENSSSCG00000034570,…	USP18,ARG1,CMPK2,RSAD2,IFIT2,IFIT1,IFIT5,CCDC80,NFKBIZ,MX2,MX1,MMP12,NOS3,DHX58,CCL5,NOS2,OPTN,PTGIR,PIM2,HERC5,IFI6,ENSSSCG00000038912,IL27,ISG15
9	response to external stimulus	GO:0009605	GO:BP	1949	71	29	ENSSSCG00000000774,ENSSSCG00000002383,ENSSSCG00000004195,ENSSSCG00000005400,ENSSSCG00000008647,ENSSSCG00000008648,ENSSSCG00000008844,ENSSSCG00000010451,ENSSSCG00000010452,ENSSSCG00000010454,ENSSSCG00000011928,ENSSSCG00000011951,ENSSSCG00000012076,ENSSSCG00000012077,ENSSSCG00000014987,ENSSSCG00000016450,ENSSSCG00000017416,ENSSSCG00000017705,ENSSSCG00000017755,ENSSSCG00000023247,ENSSSCG00000026602,…	USP18,FOS,ARG1,GRIN3A,CMPK2,RSAD2,KDR,IFIT2,IFIT1,IFIT5,CCDC80,NFKBIZ,MX2,MX1,MMP12,NOS3,DHX58,CCL5,NOS2,OPTN,PTGIR,PIM2,HERC5,IL1RL1,IFI6,ENSSSCG00000037358,ENSSSCG00000038912,IL27,ISG15
10	response to organic substance	GO:0010033	GO:BP	1950	71	28	ENSSSCG00000000774,ENSSSCG00000001906,ENSSSCG00000002383,ENSSSCG00000002829,ENSSSCG00000004195,ENSSSCG00000005400,ENSSSCG00000006140,ENSSSCG00000006893,ENSSSCG00000008647,ENSSSCG00000010452,ENSSSCG00000010603,ENSSSCG00000011453,ENSSSCG00000011951,ENSSSCG00000012076,ENSSSCG00000012077,ENSSSCG00000012277,ENSSSCG00000014336,ENSSSCG00000014987,ENSSSCG00000016450,ENSSSCG00000017402,ENSSSCG00000017705,…	USP18,CYP1A1,FOS,MMP2,ARG1,GRIN3A,CA2,BCAR3,CMPK2,IFIT1,NEURL1,ITIH4,NFKBIZ,MX2,MX1,TIMP1,EGR1,MMP12,NOS3,STAT5A,CCL5,NOS2,OPTN,PTGIR,HRH2,IL1RL1,ENSSSCG00000038912,ISG15
11	defense response to other organism	GO:0098542	GO:BP	896	71	19	ENSSSCG00000000774,ENSSSCG00000004195,ENSSSCG00000008648,ENSSSCG00000010451,ENSSSCG00000010452,ENSSSCG00000010454,ENSSSCG00000011951,ENSSSCG00000012076,ENSSSCG00000012077,ENSSSCG00000014987,ENSSSCG00000017416,ENSSSCG00000017705,ENSSSCG00000017755,ENSSSCG00000023247,ENSSSCG00000030548,ENSSSCG00000034570,ENSSSCG00000038912,ENSSSCG00000039300,ENSSSCG00000040575	USP18,ARG1,RSAD2,IFIT2,IFIT1,IFIT5,NFKBIZ,MX2,MX1,MMP12,DHX58,CCL5,NOS2,OPTN,HERC5,IFI6,ENSSSCG00000038912,IL27,ISG15
12	response to stress	GO:0006950	GO:BP	2938	71	32	ENSSSCG00000000774,ENSSSCG00000002383,ENSSSCG00000002829,ENSSSCG00000004195,ENSSSCG00000008648,ENSSSCG00000008844,ENSSSCG00000010451,ENSSSCG00000010452,ENSSSCG00000010454,ENSSSCG00000011453,ENSSSCG00000011951,ENSSSCG00000012076,ENSSSCG00000012077,ENSSSCG00000012277,ENSSSCG00000014336,ENSSSCG00000014987,ENSSSCG00000016450,ENSSSCG00000017402,ENSSSCG00000017416,ENSSSCG00000017705,ENSSSCG00000017755,…	USP18,FOS,MMP2,ARG1,RSAD2,KDR,IFIT2,IFIT1,IFIT5,ITIH4,NFKBIZ,MX2,MX1,TIMP1,EGR1,MMP12,NOS3,STAT5A,DHX58,CCL5,NOS2,OPTN,PTGIR,ENDOV,HERC5,IL1RL1,IFI6,ENSSSCG00000037358,ENSSSCG00000038912,IL27,SOD2,ISG15
13	negative regulation of viral genome replication	GO:0045071	GO:BP	36	71	6	ENSSSCG00000008648,ENSSSCG00000010452,ENSSSCG00000010454,ENSSSCG00000012077,ENSSSCG00000038912,ENSSSCG00000040575	RSAD2,IFIT1,IFIT5,MX1,ENSSSCG00000038912,ISG15
14	response to cytokine	GO:0034097	GO:BP	713	71	16	ENSSSCG00000000774,ENSSSCG00000004195,ENSSSCG00000010452,ENSSSCG00000011453,ENSSSCG00000011951,ENSSSCG00000012076,ENSSSCG00000012077,ENSSSCG00000012277,ENSSSCG00000014336,ENSSSCG00000014987,ENSSSCG00000017402,ENSSSCG00000017705,ENSSSCG00000017755,ENSSSCG00000032795,ENSSSCG00000038912,ENSSSCG00000040575	USP18,ARG1,IFIT1,ITIH4,NFKBIZ,MX2,MX1,TIMP1,EGR1,MMP12,STAT5A,CCL5,NOS2,IL1RL1,ENSSSCG00000038912,ISG15
15	cellular response to organic substance	GO:0071310	GO:BP	1473	71	22	ENSSSCG00000000774,ENSSSCG00000001906,ENSSSCG00000002829,ENSSSCG00000004195,ENSSSCG00000006140,ENSSSCG00000006893,ENSSSCG00000008647,ENSSSCG00000010452,ENSSSCG00000010603,ENSSSCG00000011951,ENSSSCG00000012077,ENSSSCG00000014336,ENSSSCG00000014987,ENSSSCG00000016450,ENSSSCG00000017402,ENSSSCG00000017705,ENSSSCG00000017755,ENSSSCG00000023247,ENSSSCG00000029096,ENSSSCG00000032795,ENSSSCG00000038912,…	USP18,CYP1A1,MMP2,ARG1,CA2,BCAR3,CMPK2,IFIT1,NEURL1,NFKBIZ,MX1,EGR1,MMP12,NOS3,STAT5A,CCL5,NOS2,OPTN,HRH2,IL1RL1,ENSSSCG00000038912,ISG15
16	regulation of response to stimulus	GO:0048583	GO:BP	2967	71	31	ENSSSCG00000000774,ENSSSCG00000001595,ENSSSCG00000003137,ENSSSCG00000004195,ENSSSCG00000005400,ENSSSCG00000006893,ENSSSCG00000008648,ENSSSCG00000008844,ENSSSCG00000010454,ENSSSCG00000010603,ENSSSCG00000011951,ENSSSCG00000012277,ENSSSCG00000014336,ENSSSCG00000014987,ENSSSCG00000016450,ENSSSCG00000017416,ENSSSCG00000017705,ENSSSCG00000021597,ENSSSCG00000023247,ENSSSCG00000026602,ENSSSCG00000026943,…	USP18,DAAM2,PLEKHA4,ARG1,GRIN3A,BCAR3,RSAD2,KDR,IFIT5,NEURL1,NFKBIZ,TIMP1,EGR1,MMP12,NOS3,DHX58,CCL5,PHLDA2,OPTN,PTGIR,MRAP2,PIM2,HERC5,IL1RL1,IFI6,KITLG,ENSSSCG00000037358,IL27,SOD2,ISG15,LIF
17	innate immune response	GO:0045087	GO:BP	659	71	15	ENSSSCG00000000774,ENSSSCG00000004195,ENSSSCG00000008648,ENSSSCG00000010451,ENSSSCG00000010452,ENSSSCG00000011951,ENSSSCG00000012077,ENSSSCG00000014987,ENSSSCG00000017416,ENSSSCG00000017705,ENSSSCG00000017755,ENSSSCG00000030548,ENSSSCG00000034570,ENSSSCG00000038912,ENSSSCG00000040575	USP18,ARG1,RSAD2,IFIT2,IFIT1,NFKBIZ,MX1,MMP12,DHX58,CCL5,NOS2,HERC5,IFI6,ENSSSCG00000038912,ISG15
18	cellular response to chemical stimulus	GO:0070887	GO:BP	1984	71	25	ENSSSCG00000000774,ENSSSCG00000001906,ENSSSCG00000002383,ENSSSCG00000002829,ENSSSCG00000004195,ENSSSCG00000006140,ENSSSCG00000006893,ENSSSCG00000008647,ENSSSCG00000008844,ENSSSCG00000010452,ENSSSCG00000010603,ENSSSCG00000011951,ENSSSCG00000012077,ENSSSCG00000014336,ENSSSCG00000014987,ENSSSCG00000016450,ENSSSCG00000017402,ENSSSCG00000017705,ENSSSCG00000017755,ENSSSCG00000023247,ENSSSCG00000029096,…	USP18,CYP1A1,FOS,MMP2,ARG1,CA2,BCAR3,CMPK2,KDR,IFIT1,NEURL1,NFKBIZ,MX1,EGR1,MMP12,NOS3,STAT5A,CCL5,NOS2,OPTN,HRH2,IL1RL1,ENSSSCG00000038912,SOD2,ISG15
19	cellular response to type I interferon	GO:0071357	GO:BP	50	71	6	ENSSSCG00000000774,ENSSSCG00000010452,ENSSSCG00000012077,ENSSSCG00000014987,ENSSSCG00000038912,ENSSSCG00000040575	USP18,IFIT1,MX1,MMP12,ENSSSCG00000038912,ISG15
20	positive regulation of cellular process	GO:0048522	GO:BP	4463	71	38	ENSSSCG00000001595,ENSSSCG00000002383,ENSSSCG00000002829,ENSSSCG00000003137,ENSSSCG00000003197,ENSSSCG00000004195,ENSSSCG00000006864,ENSSSCG00000006893,ENSSSCG00000008648,ENSSSCG00000008844,ENSSSCG00000009240,ENSSSCG00000009331,ENSSSCG00000010451,ENSSSCG00000010454,ENSSSCG00000010603,ENSSSCG00000011670,ENSSSCG00000011928,ENSSSCG00000011951,ENSSSCG00000012277,ENSSSCG00000014336,ENSSSCG00000014987,…	DAAM2,FOS,MMP2,PLEKHA4,MED25,ARG1,CDC14A,BCAR3,RSAD2,KDR,ENSSSCG00000009240,MEDAG,IFIT2,IFIT5,NEURL1,PXYLP1,CCDC80,NFKBIZ,TIMP1,EGR1,MMP12,NOS3,STAT5A,DHX58,CCL5,NOS2,PHLDA2,OPTN,MRAP2,PIM2,IL1RL1,KITLG,ENSSSCG00000037358,IL27,SOD2,ISG15,TNFAIP8,LIF
21	positive regulation of biological process	GO:0048518	GO:BP	4911	71	40	ENSSSCG00000001595,ENSSSCG00000002383,ENSSSCG00000002829,ENSSSCG00000003137,ENSSSCG00000003197,ENSSSCG00000004195,ENSSSCG00000006864,ENSSSCG00000006893,ENSSSCG00000008648,ENSSSCG00000008844,ENSSSCG00000009240,ENSSSCG00000009331,ENSSSCG00000010451,ENSSSCG00000010452,ENSSSCG00000010454,ENSSSCG00000010603,ENSSSCG00000011670,ENSSSCG00000011928,ENSSSCG00000011951,ENSSSCG00000012277,ENSSSCG00000014336,…	DAAM2,FOS,MMP2,PLEKHA4,MED25,ARG1,CDC14A,BCAR3,RSAD2,KDR,ENSSSCG00000009240,MEDAG,IFIT2,IFIT1,IFIT5,NEURL1,PXYLP1,CCDC80,NFKBIZ,TIMP1,EGR1,MMP12,NOS3,STAT5A,DHX58,CCL5,NOS2,PHLDA2,OPTN,MRAP2,PIM2,HRH2,IL1RL1,KITLG,ENSSSCG00000037358,IL27,SOD2,ISG15,TNFAIP8,LIF
22	response to type I interferon	GO:0034340	GO:BP	55	71	6	ENSSSCG00000000774,ENSSSCG00000010452,ENSSSCG00000012077,ENSSSCG00000014987,ENSSSCG00000038912,ENSSSCG00000040575	USP18,IFIT1,MX1,MMP12,ENSSSCG00000038912,ISG15
23	regulation of cell communication	GO:0010646	GO:BP	2597	71	28	ENSSSCG00000000774,ENSSSCG00000001595,ENSSSCG00000003137,ENSSSCG00000004195,ENSSSCG00000005400,ENSSSCG00000006893,ENSSSCG00000008648,ENSSSCG00000008844,ENSSSCG00000009446,ENSSSCG00000010454,ENSSSCG00000010603,ENSSSCG00000012277,ENSSSCG00000014336,ENSSSCG00000014987,ENSSSCG00000017416,ENSSSCG00000017705,ENSSSCG00000017755,ENSSSCG00000021597,ENSSSCG00000023247,ENSSSCG00000026602,ENSSSCG00000026943,…	USP18,DAAM2,PLEKHA4,ARG1,GRIN3A,BCAR3,RSAD2,KDR,PCDH17,IFIT5,NEURL1,TIMP1,EGR1,MMP12,DHX58,CCL5,NOS2,PHLDA2,OPTN,PTGIR,MRAP2,PIM2,IFI6,KITLG,ENSSSCG00000037358,SOD2,ISG15,LIF
24	regulation of signaling	GO:0023051	GO:BP	2601	71	28	ENSSSCG00000000774,ENSSSCG00000001595,ENSSSCG00000003137,ENSSSCG00000004195,ENSSSCG00000005400,ENSSSCG00000006893,ENSSSCG00000008648,ENSSSCG00000008844,ENSSSCG00000009446,ENSSSCG00000010454,ENSSSCG00000010603,ENSSSCG00000012277,ENSSSCG00000014336,ENSSSCG00000014987,ENSSSCG00000017416,ENSSSCG00000017705,ENSSSCG00000017755,ENSSSCG00000021597,ENSSSCG00000023247,ENSSSCG00000026602,ENSSSCG00000026943,…	USP18,DAAM2,PLEKHA4,ARG1,GRIN3A,BCAR3,RSAD2,KDR,PCDH17,IFIT5,NEURL1,TIMP1,EGR1,MMP12,DHX58,CCL5,NOS2,PHLDA2,OPTN,PTGIR,MRAP2,PIM2,IFI6,KITLG,ENSSSCG00000037358,SOD2,ISG15,LIF
25	regulation of viral genome replication	GO:0045069	GO:BP	61	71	6	ENSSSCG00000008648,ENSSSCG00000010452,ENSSSCG00000010454,ENSSSCG00000012077,ENSSSCG00000038912,ENSSSCG00000040575	RSAD2,IFIT1,IFIT5,MX1,ENSSSCG00000038912,ISG15
26	negative regulation of viral process	GO:0048525	GO:BP	63	71	6	ENSSSCG00000008648,ENSSSCG00000010452,ENSSSCG00000010454,ENSSSCG00000012077,ENSSSCG00000038912,ENSSSCG00000040575	RSAD2,IFIT1,IFIT5,MX1,ENSSSCG00000038912,ISG15
27	immune response	GO:0006955	GO:BP	1292	71	19	ENSSSCG00000000774,ENSSSCG00000004195,ENSSSCG00000008648,ENSSSCG00000010451,ENSSSCG00000010452,ENSSSCG00000011951,ENSSSCG00000012077,ENSSSCG00000014987,ENSSSCG00000017416,ENSSSCG00000017705,ENSSSCG00000017755,ENSSSCG00000030548,ENSSSCG00000032795,ENSSSCG00000033142,ENSSSCG00000034570,ENSSSCG00000038912,ENSSSCG00000039300,ENSSSCG00000040575,ENSSSCG00000040961	USP18,ARG1,RSAD2,IFIT2,IFIT1,NFKBIZ,MX1,MMP12,DHX58,CCL5,NOS2,HERC5,IL1RL1,ENDOU,IFI6,ENSSSCG00000038912,IL27,ISG15,LIF
28	cytokine-mediated signaling pathway	GO:0019221	GO:BP	395	71	11	ENSSSCG00000000774,ENSSSCG00000004195,ENSSSCG00000011951,ENSSSCG00000012077,ENSSSCG00000014336,ENSSSCG00000014987,ENSSSCG00000017402,ENSSSCG00000017705,ENSSSCG00000032795,ENSSSCG00000038912,ENSSSCG00000040575	USP18,ARG1,NFKBIZ,MX1,EGR1,MMP12,STAT5A,CCL5,IL1RL1,ENSSSCG00000038912,ISG15
29	regulation of signal transduction	GO:0009966	GO:BP	2272	71	25	ENSSSCG00000000774,ENSSSCG00000001595,ENSSSCG00000003137,ENSSSCG00000004195,ENSSSCG00000006893,ENSSSCG00000008648,ENSSSCG00000008844,ENSSSCG00000010454,ENSSSCG00000010603,ENSSSCG00000012277,ENSSSCG00000014336,ENSSSCG00000014987,ENSSSCG00000017416,ENSSSCG00000017705,ENSSSCG00000021597,ENSSSCG00000023247,ENSSSCG00000026602,ENSSSCG00000026943,ENSSSCG00000028964,ENSSSCG00000034570,ENSSSCG00000035495,…	USP18,DAAM2,PLEKHA4,ARG1,BCAR3,RSAD2,KDR,IFIT5,NEURL1,TIMP1,EGR1,MMP12,DHX58,CCL5,PHLDA2,OPTN,PTGIR,MRAP2,PIM2,IFI6,KITLG,ENSSSCG00000037358,SOD2,ISG15,LIF
30	negative regulation of biological process	GO:0048519	GO:BP	4385	71	36	ENSSSCG00000000774,ENSSSCG00000001595,ENSSSCG00000003197,ENSSSCG00000004195,ENSSSCG00000005400,ENSSSCG00000008648,ENSSSCG00000008844,ENSSSCG00000009446,ENSSSCG00000010452,ENSSSCG00000010454,ENSSSCG00000010603,ENSSSCG00000011453,ENSSSCG00000012077,ENSSSCG00000012277,ENSSSCG00000014336,ENSSSCG00000014987,ENSSSCG00000016450,ENSSSCG00000017416,ENSSSCG00000017705,ENSSSCG00000017755,ENSSSCG00000023247,…	USP18,DAAM2,MED25,ARG1,GRIN3A,RSAD2,KDR,PCDH17,IFIT1,IFIT5,NEURL1,ITIH4,MX1,TIMP1,EGR1,MMP12,NOS3,DHX58,CCL5,NOS2,OPTN,SLC43A2,PTGIR,MRAP2,PIM2,OSGIN1,IL1RL1,IFI6,KITLG,ID1,ENSSSCG00000037358,RND1,ENSSSCG00000038912,SOD2,ISG15,LIF
31	antiviral innate immune response	GO:0140374	GO:BP	41	71	5	ENSSSCG00000000774,ENSSSCG00000010451,ENSSSCG00000010452,ENSSSCG00000012077,ENSSSCG00000017416	USP18,IFIT2,IFIT1,MX1,DHX58
32	regulation of cell population proliferation	GO:0042127	GO:BP	1545	71	20	ENSSSCG00000001595,ENSSSCG00000002829,ENSSSCG00000003197,ENSSSCG00000004195,ENSSSCG00000008844,ENSSSCG00000010603,ENSSSCG00000012277,ENSSSCG00000014987,ENSSSCG00000016450,ENSSSCG00000017402,ENSSSCG00000017705,ENSSSCG00000017755,ENSSSCG00000021597,ENSSSCG00000026602,ENSSSCG00000028964,ENSSSCG00000032115,ENSSSCG00000035495,ENSSSCG00000039300,ENSSSCG00000040317,ENSSSCG00000040961	DAAM2,MMP2,MED25,ARG1,KDR,NEURL1,TIMP1,MMP12,NOS3,STAT5A,CCL5,NOS2,PHLDA2,PTGIR,PIM2,OSGIN1,KITLG,IL27,SOD2,LIF
33	cell surface receptor signaling pathway	GO:0007166	GO:BP	2181	71	24	ENSSSCG00000000774,ENSSSCG00000001595,ENSSSCG00000002383,ENSSSCG00000003137,ENSSSCG00000004195,ENSSSCG00000005400,ENSSSCG00000006893,ENSSSCG00000008844,ENSSSCG00000010603,ENSSSCG00000011951,ENSSSCG00000012077,ENSSSCG00000012277,ENSSSCG00000014336,ENSSSCG00000014987,ENSSSCG00000016450,ENSSSCG00000017402,ENSSSCG00000017705,ENSSSCG00000026602,ENSSSCG00000032795,ENSSSCG00000034570,ENSSSCG00000035495,…	USP18,DAAM2,FOS,PLEKHA4,ARG1,GRIN3A,BCAR3,KDR,NEURL1,NFKBIZ,MX1,TIMP1,EGR1,MMP12,NOS3,STAT5A,CCL5,PTGIR,IL1RL1,IFI6,KITLG,ENSSSCG00000038912,ISG15,LIF
34	response to stimulus	GO:0050896	GO:BP	8159	71	51	ENSSSCG00000000774,ENSSSCG00000001595,ENSSSCG00000001906,ENSSSCG00000002383,ENSSSCG00000002829,ENSSSCG00000003137,ENSSSCG00000004195,ENSSSCG00000005400,ENSSSCG00000006140,ENSSSCG00000006893,ENSSSCG00000008647,ENSSSCG00000008648,ENSSSCG00000008844,ENSSSCG00000010451,ENSSSCG00000010452,ENSSSCG00000010454,ENSSSCG00000010603,ENSSSCG00000011453,ENSSSCG00000011928,ENSSSCG00000011951,ENSSSCG00000012076,…	USP18,DAAM2,CYP1A1,FOS,MMP2,PLEKHA4,ARG1,GRIN3A,CA2,BCAR3,CMPK2,RSAD2,KDR,IFIT2,IFIT1,IFIT5,NEURL1,ITIH4,CCDC80,NFKBIZ,MX2,MX1,TIMP1,EGR1,MMP12,NOS3,STAT5A,DHX58,CCL5,NOS2,PHLDA2,OPTN,PTGIR,MRAP2,PIM2,HRH2,ENDOV,HERC5,OSGIN1,IL1RL1,ENDOU,IFI6,KITLG,ENSSSCG00000037358,PDYN,RND1,ENSSSCG00000038912,IL27,SOD2,ISG15,LIF
35	regulation of response to biotic stimulus	GO:0002831	GO:BP	354	71	10	ENSSSCG00000000774,ENSSSCG00000004195,ENSSSCG00000008648,ENSSSCG00000011951,ENSSSCG00000014987,ENSSSCG00000017416,ENSSSCG00000023247,ENSSSCG00000030548,ENSSSCG00000039300,ENSSSCG00000040575	USP18,ARG1,RSAD2,NFKBIZ,MMP12,DHX58,OPTN,HERC5,IL27,ISG15
36	cellular response to cytokine stimulus	GO:0071345	GO:BP	653	71	13	ENSSSCG00000000774,ENSSSCG00000004195,ENSSSCG00000010452,ENSSSCG00000011951,ENSSSCG00000012077,ENSSSCG00000014336,ENSSSCG00000014987,ENSSSCG00000017402,ENSSSCG00000017705,ENSSSCG00000017755,ENSSSCG00000032795,ENSSSCG00000038912,ENSSSCG00000040575	USP18,ARG1,IFIT1,NFKBIZ,MX1,EGR1,MMP12,STAT5A,CCL5,NOS2,IL1RL1,ENSSSCG00000038912,ISG15
37	regulation of response to external stimulus	GO:0032101	GO:BP	770	71	14	ENSSSCG00000000774,ENSSSCG00000004195,ENSSSCG00000005400,ENSSSCG00000008648,ENSSSCG00000008844,ENSSSCG00000011951,ENSSSCG00000014987,ENSSSCG00000017416,ENSSSCG00000017705,ENSSSCG00000023247,ENSSSCG00000030548,ENSSSCG00000032795,ENSSSCG00000039300,ENSSSCG00000040575	USP18,ARG1,GRIN3A,RSAD2,KDR,NFKBIZ,MMP12,DHX58,CCL5,OPTN,HERC5,IL1RL1,IL27,ISG15
38	immune system process	GO:0002376	GO:BP	1924	71	22	ENSSSCG00000000774,ENSSSCG00000002383,ENSSSCG00000004195,ENSSSCG00000008648,ENSSSCG00000010451,ENSSSCG00000010452,ENSSSCG00000011951,ENSSSCG00000012077,ENSSSCG00000014336,ENSSSCG00000014987,ENSSSCG00000017416,ENSSSCG00000017705,ENSSSCG00000017755,ENSSSCG00000030548,ENSSSCG00000032795,ENSSSCG00000033142,ENSSSCG00000034570,ENSSSCG00000035495,ENSSSCG00000038912,ENSSSCG00000039300,ENSSSCG00000040575,…	USP18,FOS,ARG1,RSAD2,IFIT2,IFIT1,NFKBIZ,MX1,EGR1,MMP12,DHX58,CCL5,NOS2,HERC5,IL1RL1,ENDOU,IFI6,KITLG,ENSSSCG00000038912,IL27,ISG15,LIF
39	viral genome replication	GO:0019079	GO:BP	91	71	6	ENSSSCG00000008648,ENSSSCG00000010452,ENSSSCG00000010454,ENSSSCG00000012077,ENSSSCG00000038912,ENSSSCG00000040575	RSAD2,IFIT1,IFIT5,MX1,ENSSSCG00000038912,ISG15
40	biological regulation	GO:0065007	GO:BP	11481	71	61	ENSSSCG00000000774,ENSSSCG00000001595,ENSSSCG00000001906,ENSSSCG00000002383,ENSSSCG00000002829,ENSSSCG00000003137,ENSSSCG00000003197,ENSSSCG00000003705,ENSSSCG00000004195,ENSSSCG00000005400,ENSSSCG00000006140,ENSSSCG00000006864,ENSSSCG00000006893,ENSSSCG00000008648,ENSSSCG00000008844,ENSSSCG00000009240,ENSSSCG00000009331,ENSSSCG00000009446,ENSSSCG00000010451,ENSSSCG00000010452,ENSSSCG00000010454,…	USP18,DAAM2,CYP1A1,FOS,MMP2,PLEKHA4,MED25,CABLES1,ARG1,GRIN3A,CA2,CDC14A,BCAR3,RSAD2,KDR,ENSSSCG00000009240,MEDAG,PCDH17,IFIT2,IFIT1,IFIT5,NEURL1,ITIH4,PXYLP1,CCDC80,NFKBIZ,MX2,MX1,TIMP1,EGR1,MMP12,NOS3,STAT5A,DHX58,CCL5,NOS2,PHLDA2,OPTN,SLC43A2,PTGIR,MRAP2,TBC1D2B,PIM2,HRH2,HERC5,OSGIN1,IL1RL1,CCDC8,HES2,IFI6,KITLG,ID1,ENSSSCG00000037358,PDYN,RND1,ENSSSCG00000038912,IL27,SOD2,ISG15,TNFAIP8,LIF
41	regulation of viral life cycle	GO:1903900	GO:BP	102	71	6	ENSSSCG00000008648,ENSSSCG00000010452,ENSSSCG00000010454,ENSSSCG00000012077,ENSSSCG00000038912,ENSSSCG00000040575	RSAD2,IFIT1,IFIT5,MX1,ENSSSCG00000038912,ISG15
42	negative regulation of innate immune response	GO:0045824	GO:BP	58	71	5	ENSSSCG00000000774,ENSSSCG00000004195,ENSSSCG00000014987,ENSSSCG00000017416,ENSSSCG00000040575	USP18,ARG1,MMP12,DHX58,ISG15
43	interferon-mediated signaling pathway	GO:0140888	GO:BP	60	71	5	ENSSSCG00000000774,ENSSSCG00000004195,ENSSSCG00000014987,ENSSSCG00000038912,ENSSSCG00000040575	USP18,ARG1,MMP12,ENSSSCG00000038912,ISG15
44	positive regulation of multicellular organismal process	GO:0051240	GO:BP	1149	71	16	ENSSSCG00000002383,ENSSSCG00000008648,ENSSSCG00000008844,ENSSSCG00000010603,ENSSSCG00000011951,ENSSSCG00000014336,ENSSSCG00000014987,ENSSSCG00000016450,ENSSSCG00000017416,ENSSSCG00000017755,ENSSSCG00000029096,ENSSSCG00000032795,ENSSSCG00000035495,ENSSSCG00000039300,ENSSSCG00000040575,ENSSSCG00000040961	FOS,RSAD2,KDR,NEURL1,NFKBIZ,EGR1,MMP12,NOS3,DHX58,NOS2,HRH2,IL1RL1,KITLG,IL27,ISG15,LIF
45	regulation of defense response	GO:0031347	GO:BP	545	71	11	ENSSSCG00000000774,ENSSSCG00000004195,ENSSSCG00000008648,ENSSSCG00000011951,ENSSSCG00000014987,ENSSSCG00000017416,ENSSSCG00000023247,ENSSSCG00000030548,ENSSSCG00000032795,ENSSSCG00000039300,ENSSSCG00000040575	USP18,ARG1,RSAD2,NFKBIZ,MMP12,DHX58,OPTN,HERC5,IL1RL1,IL27,ISG15
46	arginine catabolic process	GO:0006527	GO:BP	10	71	3	ENSSSCG00000004195,ENSSSCG00000016450,ENSSSCG00000017755	ARG1,NOS3,NOS2
47	regulation of biological process	GO:0050789	GO:BP	11125	71	59	ENSSSCG00000000774,ENSSSCG00000001595,ENSSSCG00000002383,ENSSSCG00000002829,ENSSSCG00000003137,ENSSSCG00000003197,ENSSSCG00000003705,ENSSSCG00000004195,ENSSSCG00000005400,ENSSSCG00000006140,ENSSSCG00000006864,ENSSSCG00000006893,ENSSSCG00000008648,ENSSSCG00000008844,ENSSSCG00000009240,ENSSSCG00000009331,ENSSSCG00000009446,ENSSSCG00000010451,ENSSSCG00000010452,ENSSSCG00000010454,ENSSSCG00000010603,…	USP18,DAAM2,FOS,MMP2,PLEKHA4,MED25,CABLES1,ARG1,GRIN3A,CA2,CDC14A,BCAR3,RSAD2,KDR,ENSSSCG00000009240,MEDAG,PCDH17,IFIT2,IFIT1,IFIT5,NEURL1,ITIH4,PXYLP1,CCDC80,NFKBIZ,MX2,MX1,TIMP1,EGR1,MMP12,NOS3,STAT5A,DHX58,CCL5,NOS2,PHLDA2,OPTN,SLC43A2,PTGIR,MRAP2,PIM2,HRH2,HERC5,OSGIN1,IL1RL1,CCDC8,HES2,IFI6,KITLG,ID1,ENSSSCG00000037358,PDYN,RND1,ENSSSCG00000038912,IL27,SOD2,ISG15,TNFAIP8,LIF
48	regulation of viral process	GO:0050792	GO:BP	122	71	6	ENSSSCG00000008648,ENSSSCG00000010452,ENSSSCG00000010454,ENSSSCG00000012077,ENSSSCG00000038912,ENSSSCG00000040575	RSAD2,IFIT1,IFIT5,MX1,ENSSSCG00000038912,ISG15
49	regulation of multicellular organismal process	GO:0051239	GO:BP	2179	71	22	ENSSSCG00000001595,ENSSSCG00000002383,ENSSSCG00000004195,ENSSSCG00000008648,ENSSSCG00000008844,ENSSSCG00000010603,ENSSSCG00000011951,ENSSSCG00000012277,ENSSSCG00000014336,ENSSSCG00000014987,ENSSSCG00000016450,ENSSSCG00000017402,ENSSSCG00000017416,ENSSSCG00000017755,ENSSSCG00000021597,ENSSSCG00000029096,ENSSSCG00000032795,ENSSSCG00000034297,ENSSSCG00000035495,ENSSSCG00000039300,ENSSSCG00000040575,…	DAAM2,FOS,ARG1,RSAD2,KDR,NEURL1,NFKBIZ,TIMP1,EGR1,MMP12,NOS3,STAT5A,DHX58,NOS2,PHLDA2,HRH2,IL1RL1,HES2,KITLG,IL27,ISG15,LIF
50	response to oxygen-containing compound	GO:1901700	GO:BP	1087	71	15	ENSSSCG00000002383,ENSSSCG00000002829,ENSSSCG00000005400,ENSSSCG00000006140,ENSSSCG00000006893,ENSSSCG00000008647,ENSSSCG00000010603,ENSSSCG00000011951,ENSSSCG00000014336,ENSSSCG00000016450,ENSSSCG00000017402,ENSSSCG00000017755,ENSSSCG00000026602,ENSSSCG00000029096,ENSSSCG00000040317	FOS,MMP2,GRIN3A,CA2,BCAR3,CMPK2,NEURL1,NFKBIZ,EGR1,NOS3,STAT5A,NOS2,PTGIR,HRH2,SOD2
51	negative regulation of immune response	GO:0050777	GO:BP	134	71	6	ENSSSCG00000000774,ENSSSCG00000004195,ENSSSCG00000014987,ENSSSCG00000017416,ENSSSCG00000032795,ENSSSCG00000040575	USP18,ARG1,MMP12,DHX58,IL1RL1,ISG15
52	cell population proliferation	GO:0008283	GO:BP	2408	71	23	ENSSSCG00000001595,ENSSSCG00000002829,ENSSSCG00000003197,ENSSSCG00000004195,ENSSSCG00000005400,ENSSSCG00000006864,ENSSSCG00000008844,ENSSSCG00000010603,ENSSSCG00000011951,ENSSSCG00000012277,ENSSSCG00000014987,ENSSSCG00000016450,ENSSSCG00000017402,ENSSSCG00000017705,ENSSSCG00000017755,ENSSSCG00000021597,ENSSSCG00000026602,ENSSSCG00000028964,ENSSSCG00000032115,ENSSSCG00000035495,ENSSSCG00000039300,…	DAAM2,MMP2,MED25,ARG1,GRIN3A,CDC14A,KDR,NEURL1,NFKBIZ,TIMP1,MMP12,NOS3,STAT5A,CCL5,NOS2,PHLDA2,PTGIR,PIM2,OSGIN1,KITLG,IL27,SOD2,LIF
53	negative regulation of response to stimulus	GO:0048585	GO:BP	1273	71	16	ENSSSCG00000000774,ENSSSCG00000004195,ENSSSCG00000005400,ENSSSCG00000010603,ENSSSCG00000014336,ENSSSCG00000014987,ENSSSCG00000016450,ENSSSCG00000017416,ENSSSCG00000023247,ENSSSCG00000026602,ENSSSCG00000026943,ENSSSCG00000032795,ENSSSCG00000034570,ENSSSCG00000040317,ENSSSCG00000040575,ENSSSCG00000040961	USP18,ARG1,GRIN3A,NEURL1,EGR1,MMP12,NOS3,DHX58,OPTN,PTGIR,MRAP2,IL1RL1,IFI6,SOD2,ISG15,LIF
54	response to chemical	GO:0042221	GO:BP	4016	71	31	ENSSSCG00000000774,ENSSSCG00000001906,ENSSSCG00000002383,ENSSSCG00000002829,ENSSSCG00000004195,ENSSSCG00000005400,ENSSSCG00000006140,ENSSSCG00000006893,ENSSSCG00000008647,ENSSSCG00000008844,ENSSSCG00000010452,ENSSSCG00000010603,ENSSSCG00000011453,ENSSSCG00000011951,ENSSSCG00000012076,ENSSSCG00000012077,ENSSSCG00000012277,ENSSSCG00000014336,ENSSSCG00000014987,ENSSSCG00000016450,ENSSSCG00000017402,…	USP18,CYP1A1,FOS,MMP2,ARG1,GRIN3A,CA2,BCAR3,CMPK2,KDR,IFIT1,NEURL1,ITIH4,NFKBIZ,MX2,MX1,TIMP1,EGR1,MMP12,NOS3,STAT5A,CCL5,NOS2,OPTN,PTGIR,HRH2,IL1RL1,ENSSSCG00000037358,ENSSSCG00000038912,SOD2,ISG15
55	cellular response to stimulus	GO:0051716	GO:BP	7091	71	44	ENSSSCG00000000774,ENSSSCG00000001595,ENSSSCG00000001906,ENSSSCG00000002383,ENSSSCG00000002829,ENSSSCG00000003137,ENSSSCG00000004195,ENSSSCG00000005400,ENSSSCG00000006140,ENSSSCG00000006893,ENSSSCG00000008647,ENSSSCG00000008648,ENSSSCG00000008844,ENSSSCG00000010452,ENSSSCG00000010454,ENSSSCG00000010603,ENSSSCG00000011951,ENSSSCG00000012077,ENSSSCG00000012277,ENSSSCG00000014336,ENSSSCG00000014987,…	USP18,DAAM2,CYP1A1,FOS,MMP2,PLEKHA4,ARG1,GRIN3A,CA2,BCAR3,CMPK2,RSAD2,KDR,IFIT1,IFIT5,NEURL1,NFKBIZ,MX1,TIMP1,EGR1,MMP12,NOS3,STAT5A,DHX58,CCL5,NOS2,PHLDA2,OPTN,PTGIR,MRAP2,PIM2,HRH2,ENDOV,OSGIN1,IL1RL1,IFI6,KITLG,ENSSSCG00000037358,PDYN,RND1,ENSSSCG00000038912,SOD2,ISG15,LIF
56	positive regulation of response to stimulus	GO:0048584	GO:BP	1649	71	18	ENSSSCG00000001595,ENSSSCG00000003137,ENSSSCG00000004195,ENSSSCG00000006893,ENSSSCG00000008648,ENSSSCG00000008844,ENSSSCG00000010454,ENSSSCG00000011951,ENSSSCG00000014987,ENSSSCG00000017416,ENSSSCG00000017705,ENSSSCG00000023247,ENSSSCG00000026943,ENSSSCG00000028964,ENSSSCG00000032795,ENSSSCG00000035495,ENSSSCG00000037358,ENSSSCG00000040961	DAAM2,PLEKHA4,ARG1,BCAR3,RSAD2,KDR,IFIT5,NFKBIZ,MMP12,DHX58,CCL5,OPTN,MRAP2,PIM2,IL1RL1,KITLG,ENSSSCG00000037358,LIF
57	positive regulation of response to external stimulus	GO:0032103	GO:BP	419	71	9	ENSSSCG00000004195,ENSSSCG00000008648,ENSSSCG00000008844,ENSSSCG00000011951,ENSSSCG00000014987,ENSSSCG00000017416,ENSSSCG00000017705,ENSSSCG00000023247,ENSSSCG00000032795	ARG1,RSAD2,KDR,NFKBIZ,MMP12,DHX58,CCL5,OPTN,IL1RL1
58	type I interferon-mediated signaling pathway	GO:0060337	GO:BP	48	71	4	ENSSSCG00000000774,ENSSSCG00000014987,ENSSSCG00000038912,ENSSSCG00000040575	USP18,MMP12,ENSSSCG00000038912,ISG15
59	negative regulation of cell communication	GO:0010648	GO:BP	1064	71	14	ENSSSCG00000000774,ENSSSCG00000004195,ENSSSCG00000009446,ENSSSCG00000010603,ENSSSCG00000014336,ENSSSCG00000014987,ENSSSCG00000017416,ENSSSCG00000023247,ENSSSCG00000026602,ENSSSCG00000026943,ENSSSCG00000034570,ENSSSCG00000040317,ENSSSCG00000040575,ENSSSCG00000040961	USP18,ARG1,PCDH17,NEURL1,EGR1,MMP12,DHX58,OPTN,PTGIR,MRAP2,IFI6,SOD2,ISG15,LIF
60	cytoplasm	GO:0005737	GO:CC	9163	70	50	ENSSSCG00000000774,ENSSSCG00000001906,ENSSSCG00000002383,ENSSSCG00000002829,ENSSSCG00000003705,ENSSSCG00000004195,ENSSSCG00000006140,ENSSSCG00000006864,ENSSSCG00000008647,ENSSSCG00000008648,ENSSSCG00000008844,ENSSSCG00000009331,ENSSSCG00000010451,ENSSSCG00000010452,ENSSSCG00000010454,ENSSSCG00000010603,ENSSSCG00000011453,ENSSSCG00000011670,ENSSSCG00000011951,ENSSSCG00000012077,ENSSSCG00000013382,…	USP18,CYP1A1,FOS,MMP2,CABLES1,ARG1,CA2,CDC14A,CMPK2,RSAD2,KDR,MEDAG,IFIT2,IFIT1,IFIT5,NEURL1,ITIH4,PXYLP1,NFKBIZ,MX1,PLEKHA7,EGR1,MMP12,NOS3,STAT5A,DHX58,CCL5,NOS2,DNAH12,PHLDA2,OPTN,PTGIR,MRAP2,TBC1D2B,PIM2,ENDOV,HERC5,IL1RL1,ENDOU,CCDC8,IFI6,KITLG,ID1,PDYN,RND1,SOD2,ISG15,TNFAIP8,LIF,HSPB7
61	tetrahydrobiopterin binding	GO:0034617	GO:MF	2	69	2	ENSSSCG00000016450,ENSSSCG00000017755	NOS3,NOS2
62	nitric-oxide synthase activity	GO:0004517	GO:MF	3	69	2	ENSSSCG00000016450,ENSSSCG00000017755	NOS3,NOS2
63	arginine binding	GO:0034618	GO:MF	4	69	2	ENSSSCG00000016450,ENSSSCG00000017755	NOS3,NOS2
64	Arginine biosynthesis	KEGG:00220	KEGG	18	31	3	ENSSSCG00000004195,ENSSSCG00000016450,ENSSSCG00000017755	ARG1,NOS3,NOS2
65	ISG15 antiviral mechanism	REAC:R-SSC-1169408	REAC	23	33	3	ENSSSCG00000012077,ENSSSCG00000030548,ENSSSCG00000040575	MX1,HERC5,ISG15

## Sheet: TC vs. CtrC
Results of Gene Ontology, KEEG and REAC enrichment analyses of differentially expressed genes identified after treatment of the porcine myometrium on days 14-15 of the estrous cycle with PPARγ antagonist T0070907 vs. control
	term_name	term_id	source	term_size	query_size	intersection_size	intersection	gene_names
1	regulation of hormone levels	GO:0010817	GO:BP	381	15	5	ENSSSCG00000001906,ENSSSCG00000008359,ENSSSCG00000014336,ENSSSCG00000017249,ENSSSCG00000029615	CYP1A1,RAB1A,EGR1,SSTR2,VAMP7
2	growth hormone secretion	GO:0030252	GO:BP	12	15	2	ENSSSCG00000008359,ENSSSCG00000017249	RAB1A,SSTR2
