# Supplementary material for: Immunomodulatory dynamics in the porcine myometrium: global transcriptome analysis, including the effects of PPARγ ligands
Source: BMC Genomics. 2024 Dec 5;25:1183. doi: 10.1186/s12864-024-11083-7 (PMC11619573; doi:10.1186/s12864-024-11083-7)
Supplement: Supplementary file 3 — Supplementary Material 3 [file 12864_2024_11083_MOESM3_ESM.xlsx]

## Sheet: CONP vs. CONC
Differentially expressed genes identified in the porcine myometrium on days 14-15 of pregnancy vs. days 14-15 of the estrous cycle
	Row.names	gene_name	baseMean	log2FoldChange	lfcSE	stat	pvalue	padj	description
1	ENSSSCG00000000006	PPARA	265.588284095361	1.6013289967292	0.40161263593771	3.9872475451135	6.68442713104028e-05	0.00271509325118017	peroxisome proliferator activated receptor alpha
2	ENSSSCG00000000061	PMM1	231.259358799345	-1.22520051502868	0.324570456988507	-3.77483683018034	0.000160112431767922	0.0053057440692269	phosphomannomutase 1
3	ENSSSCG00000000078	TNRC6B	488.611715781842	1.47139587829091	0.299307945692246	4.91599337561131	8.83333844727863e-07	7.87802925223961e-05	trinucleotide repeat containing adaptor 6B
4	ENSSSCG00000000135	KCTD17	60.061397322762	2.65218280903259	0.784037063162608	3.38272631951142	0.000717701152168496	0.0160996883118189	potassium channel tetramerization domain containing 17
5	NA	NA	549.058016393578	1.70455285641616	0.388261533811654	4.39021821111706	1.13236969966672e-05	0.00067605278598284	NA
6	ENSSSCG00000000186	RHEBL1	37.7571990004194	3.19252786873552	0.630330232582117	5.06484966722519	4.08722765503644e-07	4.13603763825639e-05	RHEB like 1
7	ENSSSCG00000000197	C1QL4	51.0929052890785	-1.92915317982697	0.660638983544882	-2.92013221725949	0.00349882908407067	0.0468499375409203	complement C1q like 4
8	ENSSSCG00000000206	FAIM2	25.369524510114	-1.90970053704502	0.656468529591303	-2.90905115929006	0.00362527530388078	0.0479651809436534	Fas apoptotic inhibitory molecule 2
9	NA	NA	317.950878036309	-2.00379444848061	0.594606604100916	-3.36994987048702	0.000751818594167112	0.0167845819573089	NA
10	ENSSSCG00000000217	RACGAP1	260.224199314408	1.68057939798057	0.502565562567412	3.34400031190983	0.00082579644588185	0.017887716716793	Rac GTPase activating protein 1
11	ENSSSCG00000000386	ANKRD52	1122.41396188215	1.17336827928109	0.302235711197119	3.88229529407204	0.000103475114254161	0.0037563026400606	ankyrin repeat domain 52
12	ENSSSCG00000000396	STAT2	1672.87110532653	1.82340294336982	0.33760653859248	5.4009704639365	6.62813394443636e-08	9.4441761732745e-06	signal transducer and activator of transcription 2
13	ENSSSCG00000000403	BAZ2A	1673.46765411907	1.30127328543626	0.323515536287012	4.02228993503983	5.7635049694129e-05	0.00244196832252427	bromodomain adjacent to zinc finger domain 2A
14	ENSSSCG00000000457	USP15	1958.33385173093	1.16379687418834	0.272982928999933	4.26325879955894	2.01466952020962e-05	0.00106507435395593	ubiquitin specific peptidase 15
15	ENSSSCG00000000466	XPOT	264.330659980465	-1.37939651339625	0.400687312875343	-3.44257596652528	0.000576202006270963	0.0135145561470826	exportin for tRNA
16	ENSSSCG00000000475	IRAK3	820.789489938798	0.953450831404986	0.312002720984138	3.0559055010724	0.00224381962862867	0.0357662149659802	interleukin 1 receptor associated kinase 3
17	ENSSSCG00000000523	BBS10	27.9334446354056	-2.52574893863481	0.659326368749211	-3.83080225264816	0.00012772612749452	0.00439377878581148	Bardet-Biedl syndrome 10
18	ENSSSCG00000000623	BCL2L14	12.9967591917393	2.96264771904321	0.987463351080421	3.00026093707849	0.00269748410116561	0.0401786085501451	BCL2 like 14
19	ENSSSCG00000000625	LRP6	880.748944535933	1.05984623738936	0.35651331356398	2.97280970181542	0.00295087342198599	0.042343768385572	LDL receptor related protein 6
20	ENSSSCG00000000661	PHC1	1106.22185658831	1.50449651442649	0.373585862709445	4.02717732281162	5.64504598118651e-05	0.00239881248047596	polyhomeotic homolog 1
21	ENSSSCG00000000665	RIMKLB	601.659555293466	-1.08797209841188	0.277622158011546	-3.9188950413916	8.89558384833296e-05	0.00335570223082806	ribosomal modification protein rimK like family member B
22	ENSSSCG00000000700	ACRBP	44.6903697506329	-1.68070046522984	0.52217022984785	-3.21868304464535	0.0012878074711643	0.0243706493010942	acrosin binding protein
23	ENSSSCG00000000730	PRMT8	35.8968523793725	-2.2840715381181	0.744148463738719	-3.0693761385229	0.00214506332857436	0.0346277932639579	protein arginine methyltransferase 8
24	ENSSSCG00000000753	WNK1	4147.1332557019	1.10360634411338	0.266255941433656	4.14490785884819	3.39950377422913e-05	0.00161158275804072	WNK lysine deficient protein kinase 1
25	ENSSSCG00000000774	USP18	1282.97085063159	1.58111042086734	0.395885361265361	3.99385927232486	6.50064555512415e-05	0.00267582128149384	ubiquitin specific peptidase 18 [Source:NCBI gene (formerly Entrezgene)
26	ENSSSCG00000000906	TMCC3	347.431998056991	1.48841660731776	0.364976071961716	4.07812106508147	4.5401125088422e-05	0.00204986079774225	transmembrane and coiled-coil domain family 3
27	ENSSSCG00000000932	NTS	13.516154675092	-3.79234230137441	0.936878966885262	-4.04784655800566	5.16910135924017e-05	0.00223602324665575	neurotensin
28	ENSSSCG00000000950	E2F7	134.495558860058	2.53327715123673	0.435503987248036	5.81688624080021	5.99539130680055e-09	1.23744876572363e-06	E2F transcription factor 7
29	ENSSSCG00000000981	CRELD2	266.500383961924	-1.22048204669834	0.419281531466468	-2.91088911650751	0.00360401893372005	0.0477714362884287	cysteine rich with EGF like domains 2
30	ENSSSCG00000001229		16382.6540747739	1.31909813820994	0.381660794337612	3.4562055044173	0.000547837476941656	0.0129964568213662	MHC class I antigen 3 [Source:NCBI gene (formerly Entrezgene)
31	ENSSSCG00000001233	TRIM26	1999.82348737021	1.3952894096792	0.391082430409772	3.56776296040002	0.000360041984740605	0.00957990164923069	tripartite motif containing 26 [Source:NCBI gene (formerly Entrezgene)
32	ENSSSCG00000001252	UBD	1556.25940207731	2.77797134302116	0.558170622675981	4.97692144689202	6.46035238192782e-07	5.98328020603161e-05	ubiquitin D [Source:NCBI gene (formerly Entrezgene)
33	NA	NA	6854.61759105448	1.71089854654447	0.410959229644857	4.16318316545171	3.13841406961294e-05	0.00151651526681498	NA
34	ENSSSCG00000001382	DDR1	353.964721371661	1.31552472689658	0.365540390261485	3.59884916125285	0.000319628502453954	0.00874519923981852	discoidin domain receptor tyrosine kinase 1
35	NA	NA	190.318327088423	2.34798583012084	0.589001500060159	3.98638344703881	6.70880599855566e-05	0.00271509325118017	NA
36	ENSSSCG00000001398		1264.85732228907	1.01152428876319	0.292346614941508	3.46001710663067	0.00054014107231263	0.0128778188329585	MHC class I antigen 7 [Source:NCBI gene (formerly Entrezgene)
37	ENSSSCG00000001453	HLA-DRA	2814.99005566397	1.16997807382081	0.395188892185491	2.96055404632085	0.00307086236306491	0.0432856774844506	MHC class II DR-alpha [Source:NCBI gene (formerly Entrezgene)
38	ENSSSCG00000001463	PSMB9	913.006563883638	1.66363871820977	0.360163917653876	4.61911545455967	3.85379388687812e-06	0.000277013005361269	proteasome 20S subunit beta 9
39	ENSSSCG00000001507	TAPBP	2474.1153411945	0.988788153557554	0.301608086130968	3.27838741408342	0.00104402001639376	0.0210745029785244	TAP binding protein
40	ENSSSCG00000001509	DAXX	2934.02219892005	1.40860045333685	0.352314912540289	3.9981289556563	6.38451666854022e-05	0.00265067519618015	death domain associated protein
41	ENSSSCG00000001516		1840.72898981318	1.27890725283197	0.287400150652129	4.44991851928415	8.59028742246316e-06	0.000559065192251116	BCL2 antagonist/killer 1
42	ENSSSCG00000001523	GRM4	32.7143455260348	-2.70889090256644	0.734506191515745	-3.68804365961342	0.000225984880965236	0.00675422307290128	glutamate metabotropic receptor 4
43	ENSSSCG00000001549	FKBP5	1533.30864644484	1.37422860017398	0.288646107522797	4.76094623955891	1.92687376574454e-06	0.000151301479171071	FKBP prolyl isomerase 5
44	ENSSSCG00000001560	BNIP5	10.2627980138346	6.637869731093	1.57142118377642	4.22411877835385	2.3987751986205e-05	0.00121605277437435	BCL2 interacting protein 5
45	ENSSSCG00000001561	ETV7	492.780874719255	2.49864267116279	0.403130728100294	6.19809530009621	5.71505349948805e-10	1.65142185921207e-07	ETS variant transcription factor 7
46	ENSSSCG00000001567	CPNE5	41.3656306519516	-2.91483095453392	0.802979984277454	-3.63001695136495	0.000283402607286629	0.00796614955267939	copine 5
47	ENSSSCG00000001595	DAAM2	1926.00815604103	1.57851481222142	0.445491419789842	3.54331136829992	0.000395135872774889	0.0101751641162317	dishevelled associated activator of morphosis 2
48	ENSSSCG00000001667	ZNF318	595.663618074393	1.2763324800492	0.36235429864434	3.52233293443539	0.000427766561401364	0.0107112153884349	zinc finger protein 318
49	ENSSSCG00000001697	TMEM63B	1884.15933969971	0.985685421308538	0.324978835279639	3.03307574002588	0.00242074834378428	0.0374063872417062	transmembrane protein 63B
50	ENSSSCG00000001710	RUNX2	242.817561908435	-2.1730294841373	0.527101964116591	-4.12259796409456	3.74623206520035e-05	0.00173479361788508	RUNX family transcription factor 2
51	ENSSSCG00000001727	TNFRSF21	1404.2826662426	-1.56453599645659	0.373330440897309	-4.19075388735027	2.78029112998863e-05	0.00138516021538192	TNF receptor superfamily member 21
52	ENSSSCG00000001750	PAQR8	147.887228265679	1.95011225153658	0.502175432878642	3.8833286613761	0.00010303614555877	0.00374978899504563	progestin and adipoQ receptor family member 8
53	ENSSSCG00000001869	PEAK1	1241.69666604129	1.80126495793286	0.347658991186171	5.18112576863655	2.2055071412263e-07	2.50906828160926e-05	pseudopodium enriched atypical kinase 1
54	ENSSSCG00000001888	RPP25	35.494655027306	-2.73632566470918	0.931298878278592	-2.93818206864695	0.00330143078963607	0.0448896836292545	ribonuclease P and MRP subunit p25
55	ENSSSCG00000001906	CYP1A1	343.503064196243	-1.38225681600421	0.421639906471766	-3.27828745521451	0.00104438982091801	0.0210745029785244	cytochrome P450 family 1 subfamily A member 1
56	ENSSSCG00000001909	STRA6	27.166441871091	-2.9916414412498	0.881965326882987	-3.39201706695518	0.000693801184411336	0.0156625617380859	signaling receptor and transporter of retinol STRA6
57	ENSSSCG00000001910	ISLR	279.385468677558	-1.5161976841407	0.496423625974019	-3.05424158885632	0.00225630302275671	0.0357838266441152	immunoglobulin superfamily containing leucine rich repeat
58	ENSSSCG00000001912	PML	5652.8467861515	1.91463974390486	0.378201260477193	5.06248906068975	4.13817817160545e-07	4.13603763825639e-05	PML nuclear body scaffold
59	ENSSSCG00000001920	HCN4	165.720842894587	1.68864243928779	0.547510520278525	3.08421916427973	0.00204087190049172	0.0334314254175786	hyperpolarization activated cyclic nucleotide gated potassium channel 4
60	ENSSSCG00000001934		2450.03539496666	1.16786550835607	0.387359718835002	3.01493792867381	0.00257031851890191	0.0389265848648792	SEC23 homolog A, COPII coat complex component
61	ENSSSCG00000001952	NFKBIA	7376.7882215031	1.64236744456907	0.33759711162939	4.86487409990652	1.14529687484257e-06	9.79127174421626e-05	NFKB inhibitor alpha
62	ENSSSCG00000001958	BAZ1A	4235.45119145133	1.16860057305323	0.296348174452826	3.94333650008449	8.03557811327024e-05	0.00311254779036269	bromodomain adjacent to zinc finger domain 1A
63	ENSSSCG00000001971	HECTD1	2375.99133317588	1.13846818907844	0.331518151546389	3.43410514256302	0.000594513541131413	0.013787370212306	HECT domain E3 ubiquitin protein ligase 1
64	ENSSSCG00000002002	IRF9	71.5688966997149	2.14726433678558	0.570706947174969	3.76246398859285	0.000168247540134297	0.00547767371055687	interferon regulatory factor 9
65	ENSSSCG00000002263	SLCO3A1	415.753027048959	-1.28453484712609	0.361262371411544	-3.5556840368043	0.000376996936109568	0.00983186233377445	solute carrier organic anion transporter family member 3A1
66	ENSSSCG00000002283	FUT8	1026.69979281753	1.46467559217207	0.391980752727991	3.736600794755	0.000186524699302525	0.00590988784105894	fucosyltransferase 8
67	ENSSSCG00000002292	PLEKHH1	61.962612783397	-2.39497899125314	0.710179057148194	-3.37235936084973	0.000745271377849835	0.0166682366364929	pleckstrin homology, MyTH4 and FERM domain containing H1
68	ENSSSCG00000002298	ZFYVE26	981.43466099852	1.56472686123303	0.314387474118286	4.97706489618067	6.45556827145519e-07	5.98328020603161e-05	zinc finger FYVE-type containing 26
69	ENSSSCG00000002311	SUSD6	4212.53602559634	1.48571822100284	0.356306900047826	4.16977111811031	3.04905699330219e-05	0.00147828105500772	sushi domain containing 6
70	ENSSSCG00000002330	PCNX1	2311.66256228242	0.958569852949137	0.26846918097099	3.5705023924244	0.000356297199856482	0.00950032528953852	pecanex 1
71	ENSSSCG00000002344	RIOX1	381.606145622131	-1.04994927483561	0.360152998519785	-2.91528677853818	0.00355361837268223	0.0474078284843147	ribosomal oxygenase 1
72	ENSSSCG00000002469	OTUB2	59.0929152473502	1.73710932959769	0.510522260866857	3.40261231047616	0.000667449166236799	0.0152102611258506	OTU deubiquitinase, ubiquitin aldehyde binding 2
73	ENSSSCG00000002470	DDX24	2493.83874444494	0.931000677181796	0.31849427016913	2.9231316365202	0.00346529981089954	0.0465303454162421	DEAD-box helicase 24
74	ENSSSCG00000002474	PPP4R4	16.9280687516298	4.38045881928805	1.2951007531099	3.3823305320218	0.000718736085349057	0.0160996883118189	protein phosphatase 4 regulatory subunit 4
75	ENSSSCG00000002501	BDKRB1	2781.85234142567	3.82808822702578	1.11799244590098	3.42407342827862	0.000616899498913783	0.0142607423364901	bradykinin receptor B1 [Source:NCBI gene (formerly Entrezgene)
76	ENSSSCG00000002515	SLC25A47	412.179560961906	2.0388959816625	0.463018193624997	4.40348999182919	1.06523200283849e-05	0.000654913701149382	solute carrier family 25 member 47
77	ENSSSCG00000002516	WARS1	11098.6110296782	2.22073890253184	0.337115505539412	6.58747184879106	4.47378773887277e-11	1.70098119082194e-08	tryptophanyl-tRNA synthetase 1
78	ENSSSCG00000002639	TUBB3	30.8938069605212	-3.17352892198959	0.800769961013306	-3.96309686488959	7.39837454864596e-05	0.00293658559007793	tubulin beta 3 class III
79	ENSSSCG00000002660	MTHFSD	156.524096384071	-1.31359909631976	0.447505654388523	-2.93537988500877	0.00333139561338637	0.0450674193091819	methenyltetrahydrofolate synthetase domain containing
80	ENSSSCG00000002671	ATP2C2	13.6007112900214	-3.95780400436614	1.34633550505261	-2.93968627397335	0.00328544720314918	0.044875866167764	ATPase secretory pathway Ca2+ transporting 2
81	ENSSSCG00000002690	GAN	183.107957816702	1.49543361585916	0.444497376873571	3.36432495142601	0.00076731141804778	0.0170293630844153	gigaxonin
82	ENSSSCG00000002716	MLKL	1656.04470060814	1.23824077162013	0.331606032111086	3.73407191581284	0.000188408656831597	0.00593056268824163	mixed lineage kinase domain like pseudokinase
83	ENSSSCG00000002755	NFAT5	967.263816588131	1.11088504850119	0.339630465965475	3.27086395310049	0.00107219477361304	0.0215144666612329	nuclear factor of activated T cells 5
84	NA	NA	12.6446992966402	-3.77737452005671	1.02998312324364	-3.66741399428075	0.0002450159235706	0.00715149507827885	NA
85	ENSSSCG00000002836	SALL1	35.9058695864788	-2.42962701979463	0.740489089149708	-3.28111116746437	0.0010339898209699	0.0209818608614791	spalt like transcription factor 1
86	ENSSSCG00000002841	N4BP1	2905.63862377029	1.93660194721585	0.276137994789552	7.01316727055889	2.32982625533343e-12	1.20219034775205e-09	NEDD4 binding protein 1
87	ENSSSCG00000003015	EXOSC5	331.044913155776	-1.01781081585253	0.350955017174621	-2.90011758215189	0.00373022701626362	0.0486410829701957	exosome component 5
88	ENSSSCG00000003112	BBC3	94.6612724845521	-1.44368319558663	0.402193094212651	-3.58952755867886	0.000331277809021842	0.00896311195645613	BCL2 binding component 3
89	ENSSSCG00000003137	PLEKHA4	808.199315055333	2.37342805847633	0.462767184030626	5.12877347482628	2.91636009583374e-07	3.19208868671257e-05	pleckstrin homology domain containing A4
90	ENSSSCG00000003197	MED25	896.443924739348	1.52410571309895	0.316510571328535	4.81533904760779	1.46950168750707e-06	0.00011927730551181	mediator complex subunit 25
91	ENSSSCG00000003241	ZNF614	129.794923498284	1.54159414952717	0.409565979403894	3.76397021981879	0.000167236808622392	0.00546660047732201	zinc finger protein 614
92	ENSSSCG00000003419	MAD2L2	373.973893379669	1.49904934157765	0.433387251300848	3.45891425527201	0.000542357533919541	0.0129093602142826	mitotic arrest deficient 2 like 2
93	ENSSSCG00000003431	NPPB	7.31181314113334	-3.95917683655186	1.24855035595513	-3.17101894822906	0.00151905234194991	0.0273262449179824	natriuretic peptide B
94	ENSSSCG00000003435	MIIP	485.998052912437	-1.69369019263356	0.403950217451178	-4.19281911350441	2.755091236627e-05	0.0013773549545601	migration and invasion inhibitory protein
95	ENSSSCG00000003439	DHRS3	2406.83409715085	-1.76895099468247	0.45502146758065	-3.88762096014499	0.000101231543812242	0.00369341753787694	dehydrogenase/reductase 3
96	ENSSSCG00000003488	UBR4	5909.30413580415	1.11708021350058	0.374001159329468	2.98683623201423	0.00281880678638248	0.0413463151773137	ubiquitin protein ligase E3 component n-recognin 4
97	ENSSSCG00000003512	EIF4G3	3056.52526011354	1.14327885410419	0.294889249974196	3.87697704885557	0.000105762330527206	0.00382970965277462	eukaryotic translation initiation factor 4 gamma 3
98	ENSSSCG00000003591	PUM1	1840.96628355476	0.970532413738037	0.328611193023964	2.95343687111492	0.00314256877026228	0.0439108642096222	pumilio RNA binding family member 1
99	ENSSSCG00000003601	HCRTR1	24.6455577228547	-2.63326774773532	0.631086201121409	-4.17259598301489	3.01148668744157e-05	0.00146993106959986	hypocretin receptor 1
100	ENSSSCG00000003651	RHBDL2	235.127599654614	1.24719476684652	0.354476798790728	3.51841015011768	0.000434140802370045	0.0108073975033323	rhomboid like 2
101	ENSSSCG00000003669	MFSD2A	1300.82796717488	1.44193248644943	0.368845257420875	3.90931551223415	9.25580107257126e-05	0.00345549906709327	MFSD2 lysolipid transporter A, lysophospholipid
102	ENSSSCG00000003670	RLF	1657.72510852527	1.43177217957683	0.289413279084532	4.94715440876033	7.53062395387084e-07	6.80015343034537e-05	RLF zinc finger
103	ENSSSCG00000003682	ANKRD12	5807.3627730395	0.962167658456193	0.308506453973625	3.11879264133142	0.00181593710851406	0.0309241309758537	ankyrin repeat domain 12
104	ENSSSCG00000003708	ANKRD29	260.5059773658	-0.944638142466415	0.316520162241404	-2.98444856017089	0.00284089964274216	0.0416281116007492	ankyrin repeat domain 29
105	ENSSSCG00000003713	IMPACT	276.503491697555	-1.38238940829856	0.385761834681038	-3.58353077992169	0.000338980797842395	0.00913730329706514	impact RWD domain protein
106	ENSSSCG00000003744	MOCOS	86.5862537891308	1.30367853310537	0.399678041742542	3.26182175888749	0.00110698724092211	0.0219996584000587	molybdenum cofactor sulfurase
107	ENSSSCG00000003748	CELF4	52.6198703013645	1.46573950738954	0.494739433384504	2.96264944429928	0.00305003710874376	0.04316509847851	CUGBP Elav-like family member 4
108	ENSSSCG00000003753		21.723611031288	-2.71705640850728	0.868754066113788	-3.1275323068835	0.00176280444934119	0.0303202365286684	PDZK1 interacting protein 1 [Source:NCBI gene (formerly Entrezgene)
109	ENSSSCG00000003763	IFI44	3223.16399805016	2.4616016425644	0.326215610282554	7.54593454443296	4.49055560112248e-14	3.24397736625088e-11	interferon induced protein 44
110	ENSSSCG00000003788	PTGER3	1854.67700450818	-1.60621377484767	0.316538483343542	-5.07430805215689	3.88908582174442e-07	4.04241093183909e-05	prostaglandin E receptor 3
111	ENSSSCG00000003805	PDE4B	5832.52074188878	1.60350955662471	0.319693144451459	5.0157771114425	5.28195339303161e-07	5.05072806401635e-05	phosphodiesterase 4B
112	ENSSSCG00000003818	DOCK7	1469.01267876966	0.982494921125396	0.303428466116593	3.23797873581139	0.00120379781588127	0.023251966368787	dedicator of cytokinesis 7
113	ENSSSCG00000003832	TACSTD2	45.1331137866894	-2.26157939839453	0.611933534837639	-3.69579254876853	0.000219201908790436	0.00662558405482056	tumor associated calcium signal transducer 2
114	ENSSSCG00000003897	MOB3C	1584.87754013221	1.47696398045117	0.423436148310167	3.48804415103761	0.000486567725769781	0.0118150092469274	MOB kinase activator 3C
115	NA	NA	73.5420186772388	-1.69437449943041	0.448818890533754	-3.77518534795937	0.000159888733331945	0.0053057440692269	NA
116	ENSSSCG00000004087	CCDC170	339.447253210526	-1.2180240373927	0.326404717446425	-3.73163735782286	0.00019023923245776	0.00594929963322448	coiled-coil domain containing 170
117	ENSSSCG00000004110	TAB2	2159.56117377872	1.12059595485518	0.308380365954514	3.63381096389406	0.000279265503750334	0.00788052343395474	TGF-beta activated kinase 1 (MAP3K7) binding protein 2
118	ENSSSCG00000004125	STX11	3806.04442734915	1.57217133010659	0.361629624345371	4.34746277480051	1.37721435734955e-05	0.000795919721399453	syntaxin 11
119	ENSSSCG00000004138	HIVEP2	3705.16764643045	1.90768567268389	0.346329881376153	5.50829072300559	3.62334658081286e-08	5.51603875663973e-06	HIVEP zinc finger 2
120	ENSSSCG00000004154	TNFAIP3	3768.82490640688	2.10718463151485	0.34667091618673	6.07834269656426	1.21431023134317e-09	3.13292039686537e-07	TNF alpha induced protein 3
121	ENSSSCG00000004201	TMEM200A	29.9331891366207	-2.36794066952076	0.551820737115777	-4.29114114467204	1.77757280541747e-05	0.000965502702732017	transmembrane protein 200A
122	ENSSSCG00000004218	RSPO3	1545.39682429883	1.7716456670052	0.574357989112272	3.08456694359462	0.00203848728817455	0.0334302659926741	R-spondin 3
123	ENSSSCG00000004224	HDDC2	342.636133427589	-2.09372558579818	0.374710772316608	-5.58757778126834	2.30258636683806e-08	3.82388135954899e-06	HD domain containing 2
124	ENSSSCG00000004225	TPD52L1	19.2013705719325	-2.31442533257214	0.790616151095919	-2.9273691529878	0.00341842867703583	0.0459864595212418	TPD52 like 1
125	ENSSSCG00000004247	ASF1A	252.147883579453	-1.0132231257716	0.311806257544965	-3.24952787589736	0.00115596748034973	0.0226613543501939	anti-silencing function 1A histone chaperone
126	ENSSSCG00000004270	ADGRB3	6.15888116054062	4.90611091802297	1.65435990367968	2.96556445009978	0.00302128033075967	0.0429217878257776	adhesion G protein-coupled receptor B3
127	ENSSSCG00000004371	CRYBG1	1476.59597084402	1.01890101191847	0.291802265814168	3.49175154303754	0.000479864388503674	0.0116915357252969	crystallin beta-gamma domain containing 1
128	ENSSSCG00000004507	SMAD7	563.217215856831	1.07781083087656	0.303021526801278	3.5568787546351	0.000375287256536304	0.00982273601890673	SMAD family member 7
129	ENSSSCG00000004509	LIPG	201.62920191474	1.92324440271029	0.568145125796323	3.3851287556408	0.000711448742563049	0.016010921234503	lipase G, endothelial type
130	ENSSSCG00000004551	ZNF609	1799.23939611648	1.42999281225779	0.28825938097865	4.96078499649489	7.02088690920823e-07	6.42011228254687e-05	zinc finger protein 609
131	ENSSSCG00000004565	CA12	56.1445371555922	-4.67201633392258	0.691251935495361	-6.75877504860011	1.39163262230569e-11	6.48590584744279e-09	carbonic anhydrase 12
132	ENSSSCG00000004569	LACTB	298.477827139751	1.60996885334922	0.405225446234429	3.97302012573471	7.096705038202e-05	0.00284814428866507	lactamase beta
133	ENSSSCG00000004624	MAPK6	6568.22055327306	0.969829909850174	0.292714326658355	3.31323007288988	0.000922250804543239	0.0194237312303801	mitogen-activated protein kinase 6
134	ENSSSCG00000004647	DTWD1	326.883709197284	-1.17159016493599	0.3527558377028	-3.32124954349604	0.00089615373130363	0.0189398830331623	DTW domain containing 1
135	ENSSSCG00000004657	CEP152	260.778729033669	1.53751343296499	0.400528547879506	3.8387112257165	0.000123681789129207	0.0043061569484693	centrosomal protein 152
136	ENSSSCG00000004670	C15orf48	349.716421647032	1.84102803279892	0.594766392893332	3.09538005979617	0.00196560852300636	0.0325178838133491	chromosome 1 C15orf48 homolog
137	ENSSSCG00000004672	GATM	128.639419051508	-1.74484756784589	0.592272301335337	-2.94602257088835	0.00321888910782135	0.0443341371113469	glycine amidinotransferase
138	ENSSSCG00000004687		17817.3862369981	0.993320800430856	0.340834598848902	2.91437783542396	0.0035639826780662	0.0475022340707568	beta-2-microglobulin
139	ENSSSCG00000004695	WDR76	158.236018837131	1.97740578913036	0.436312330181541	4.53208780120333	5.84035636102972e-06	0.000396157130066467	WD repeat domain 76
140	ENSSSCG00000004718	TTBK2	136.690500838086	1.29860860435749	0.441805071315829	2.93932480333428	0.00328928171869201	0.044875866167764	tau tubulin kinase 2
141	ENSSSCG00000004789	THBS1	120441.16169438	1.13833667116643	0.341224224442753	3.33603709708896	0.000849818229673118	0.0182168750479484	thrombospondin 1
142	ENSSSCG00000004829	CACHD1	296.057996902573	1.14067614172562	0.309568878378585	3.68472485897191	0.000228949826656211	0.00676455438758473	cache domain containing 1
143	ENSSSCG00000004830		2127.14770527382	2.09760379612355	0.331830728818665	6.32130666014907	2.59360738131646e-10	8.32720876561339e-08	ATPase phospholipid transporting 10A (putative)
144	ENSSSCG00000004859	ZNF516	661.37689565018	1.60294160363312	0.433559030921566	3.6971703719928	0.000218016032229892	0.006624382533521	zinc finger protein 516
145	ENSSSCG00000004870	CNDP2	3258.03390325006	1.18445286681881	0.334627638133872	3.53961458002746	0.000400711779292371	0.0102424880627144	carnosine dipeptidase 2
146	ENSSSCG00000005020	ATL1	56.675850835078	-1.45640149799141	0.488214181116246	-2.98312002052361	0.0028532608174833	0.0416824188988865	atlastin GTPase 1
147	ENSSSCG00000005022	NIN	1135.26973993804	1.37825712128857	0.31308081811702	4.40224070442226	1.07138597027442e-05	0.000655906122818848	ninein
148	ENSSSCG00000005055	LGALS3	2049.98139057394	-1.95822455878121	0.482445470251895	-4.05895521779648	4.92927646859163e-05	0.00217792619015938	galectin 3
149	ENSSSCG00000005166	MLLT3	150.304801636249	1.07282933280954	0.339609155551531	3.15901180893444	0.00158305075803854	0.0280981785652836	MLLT3 super elongation complex subunit
150	ENSSSCG00000005167	SLC24A2	76.0525633132731	1.77451142461373	0.487865304007364	3.63729785667838	0.000275513262979236	0.00780512867357647	solute carrier family 24 member 2
151	ENSSSCG00000005191	MPDZ	1664.33834176923	1.14062826386311	0.291167581104	3.91742878633077	8.94984728156103e-05	0.00336738003968734	multiple PDZ domain crumbs cell polarity complex component
152	ENSSSCG00000005211	CD274	3205.82389976325	4.89815833471359	0.393228166212858	12.4562754033804	1.29268257244178e-35	9.33833890331939e-32	CD274 molecule
153	ENSSSCG00000005215	JAK2	2840.86380329457	0.975363815060615	0.324871799096346	3.00230373265287	0.0026794468930617	0.0400337628862	Janus kinase 2
154	ENSSSCG00000005249	ENTREP1	97.7471848390737	-2.28709123936184	0.539273570190551	-4.24105939134695	2.22467255046766e-05	0.00113978968117577	endosomal transmembrane epsin interactor 1
155	ENSSSCG00000005268	RORB	228.155357846677	1.71009819595602	0.429865066561282	3.97822090926346	6.9432847953482e-05	0.00280213907048019	RAR related orphan receptor B
156	ENSSSCG00000005287	PSAT1	220.954494135392	-1.76370694765808	0.470204884997491	-3.75093284636439	0.000176177884566423	0.00564394251932522	phosphoserine aminotransferase 1
157	ENSSSCG00000005288	TLE4	1105.1475107405	1.09588484259503	0.295580428105691	3.70756903499432	0.000209258381311785	0.00641903416813731	TLE family member 4, transcriptional corepressor
158	ENSSSCG00000005385	NR4A3	6166.21794908241	2.48527349466659	0.613037703586434	4.05403041301877	5.03426670768648e-05	0.0022040934967471	nuclear receptor subfamily 4 group A member 3
159	ENSSSCG00000005423	ABCA1	2654.66273625477	1.42098612321856	0.326735665898694	4.34903890675693	1.3673545463963e-05	0.000793395119933083	ATP binding cassette subfamily A member 1
160	ENSSSCG00000005494	TNC	18862.7016643092	1.42037503713946	0.482113896937356	2.94614000169345	0.00321766726473359	0.0443341371113469	tenascin C
161	ENSSSCG00000005511	TRAF1	405.409481159048	2.01141963880889	0.474809916338159	4.23626291194887	2.2727065165221e-05	0.00116028493818768	TNF receptor associated factor 1
162	ENSSSCG00000005638	LCN2	515.916337625961	-3.46810427440731	0.495594462867212	-6.99786727709373	2.59888101096097e-12	1.29478044297807e-09	lipocalin 2
163	ENSSSCG00000005646	COQ4	149.811727270981	-1.08052143385375	0.370926606592564	-2.91303296838078	0.00357936809428168	0.0475756303828719	coenzyme Q4
164	ENSSSCG00000005724	SETX	3091.7022766364	1.54798843827342	0.468774262399151	3.3022044135933	0.0009592813386279	0.0200574483075194	senataxin
165	ENSSSCG00000005832	MAMDC4	1720.26092503257	-1.20297658880902	0.381538725994655	-3.15296064815678	0.00161623593095158	0.0285120594998638	MAM domain containing 4
166	ENSSSCG00000005935	AGO2	2941.17753535688	1.11677355752064	0.370982452856589	3.01031369252485	0.00260978000594906	0.0392771890895334	argonaute RISC catalytic component 2
167	ENSSSCG00000005975	MTSS1	690.73869242235	-1.57614681330867	0.528475222622894	-2.98244221457733	0.00285958624885254	0.0417326284074965	MTSS I-BAR domain containing 1
168	ENSSSCG00000005983	ATAD2	335.638578461818	2.07286138200688	0.453207345274794	4.57375945826747	4.79049793817773e-06	0.000338304923045197	ATPase family AAA domain containing 2
169	ENSSSCG00000006002	CCN3	161.339066994007	-1.59213741752725	0.385609812140615	-4.12888201337228	3.64531391352113e-05	0.00169895146524365	cellular communication network factor 3
170	ENSSSCG00000006035	ANGPT1	28.4832085864782	2.71946550890123	0.92024028224708	2.95516895028843	0.00312497869971217	0.0437996849552349	angiopoietin 1
171	ENSSSCG00000006052	FZD6	315.198192119352	0.95760073001867	0.323320884985648	2.96176577043941	0.00305880380480497	0.0432422674871059	frizzled class receptor 6
172	ENSSSCG00000006071	VPS13B	571.44465141545	1.06965020126085	0.358773166698787	2.98141082038861	0.00286923600713475	0.0417890341039142	vacuolar protein sorting 13 homolog B
173	ENSSSCG00000006169	ZFHX4	117.49713315039	1.75622456403519	0.365487940516844	4.80515051071637	1.54635132815877e-06	0.000124120466606878	zinc finger homeobox 4
174	ENSSSCG00000006209	VCPIP1	3065.13728011474	1.42184772462975	0.259240410663132	5.48466853988039	4.14245383406364e-08	6.22901404612785e-06	valosin containing protein interacting protein 1
175	ENSSSCG00000006237	SDCBP	3686.55961049439	1.29380533796396	0.301746570886132	4.28772175990093	1.80515008251977e-05	0.000976809303080361	syndecan binding protein
176	ENSSSCG00000006288	SELP	177.135597378981	1.44599660047775	0.462022897645354	3.12970765701678	0.00174980348160654	0.0301932789890912	selectin P
177	ENSSSCG00000006289	F5	28.014592674306	2.11174445890486	0.697448315847468	3.0278149805823	0.00246328853137715	0.0378809111866117	coagulation factor V
178	ENSSSCG00000006302	GPR161	66.6206605928596	2.08852360453183	0.501856844563951	4.16159234880316	3.1603614417787e-05	0.00151697349205377	G protein-coupled receptor 161
179	ENSSSCG00000006307	RCSD1	382.258172203264	1.68079873238013	0.30514953253185	5.50811504915116	3.62696346816704e-08	5.51603875663973e-06	RCSD domain containing 1
180	ENSSSCG00000006335	RGS4	1737.58414135756	-1.3066662650424	0.44739138057313	-2.92063352532294	0.00349320469980647	0.0468269537858407	regulator of G protein signaling 4
181	ENSSSCG00000006336	CCDC190	10.4993766762563	-2.99111800654634	0.913123576888082	-3.27569902065178	0.00105400821755816	0.0212093464168249	coiled-coil domain containing 190
182	ENSSSCG00000006338	DDR2	831.04922616928	1.21295660662651	0.368903118339878	3.28800854838258	0.00100898775747109	0.0206674878650353	discoidin domain receptor tyrosine kinase 2
183	ENSSSCG00000006342	UHMK1	2730.95080129055	1.2831740565517	0.404479782442109	3.17240592052423	0.00151181533341076	0.0273033849213983	U2AF homology motif kinase 1
184	ENSSSCG00000006345	OLFML2B	320.511403634481	1.97039287890834	0.523977183798725	3.76045549278196	0.00016960424997669	0.00549426503063502	olfactomedin like 2B
185	ENSSSCG00000006360	B4GALT3	344.639681517368	0.943476034602908	0.310328066134926	3.04025364625801	0.00236378983563217	0.0368198854097952	beta-1,4-galactosyltransferase 3
186	ENSSSCG00000006371	USF1	1069.73245393952	1.09652465542748	0.303796371390097	3.6094066904422	0.000306898140718726	0.00844878247972658	upstream transcription factor 1
187	ENSSSCG00000006378	SLAMF7	92.8791716129731	3.44067815132674	0.642895696692801	5.35184504893461	8.70619355623117e-08	1.16469522685581e-05	SLAM family member 7
188	ENSSSCG00000006380	SLAMF1	36.8237785879809	2.80277110751003	0.658105239450653	4.25884940507329	2.0548183925903e-05	0.00107956422313253	signaling lymphocytic activation molecule family member 1
189	ENSSSCG00000006464	NTRK1	20.5732616574079	-2.88862516304648	0.771007420236051	-3.74655948468317	0.000179276506263401	0.00573050212941065	neurotrophic receptor tyrosine kinase 1
190	ENSSSCG00000006472	CRABP2	48.7777099079844	-2.66066927486441	0.620895225663834	-4.28521458192843	1.82562891477011e-05	0.000984204722410394	cellular retinoic acid binding protein 2
191	ENSSSCG00000006474	NES	2099.54481654024	-1.81944490569609	0.403912938330421	-4.50454722549069	6.65146055002587e-06	0.000444908805679508	nestin
192	ENSSSCG00000006503	RXFP4	99.448599533902	-1.7471485766342	0.464722216270858	-3.75955466612747	0.000170216082211337	0.00550174934181072	relaxin family peptide/INSL5 receptor 4
193	ENSSSCG00000006520	SCAMP3	293.01611048361	1.1885271474686	0.31556610848085	3.76633331503888	0.000165662595771817	0.00543975723570731	secretory carrier membrane protein 3
194	ENSSSCG00000006529	SLC50A1	212.188741037116	-1.09913468600153	0.368792212334429	-2.98036305876442	0.00287906933005751	0.0418658386702086	solute carrier family 50 member 1
195	ENSSSCG00000006543	ADAR	2389.57770439407	1.32848050802836	0.364833383310061	3.64133483612523	0.000271228105695206	0.0077379890423239	adenosine deaminase RNA specific
196	ENSSSCG00000006547	SHE	137.424064536182	-1.09184892885889	0.368864807808083	-2.96002466417714	0.003076144140965	0.0433178660318347	Src homology 2 domain containing E
197	ENSSSCG00000006550	ATP8B2	1937.51834632457	1.08234651395002	0.286213323786302	3.78160771704026	0.000155818771465531	0.00518725716620736	ATPase phospholipid transporting 8B2
198	ENSSSCG00000006619	SNX27	106.305943272907	1.26570197393698	0.430795023950603	2.93806080286134	0.00330272243202503	0.0448896836292545	sorting nexin 27
199	ENSSSCG00000006648	CTSS	2820.64774918414	2.28801261546718	0.423713030765343	5.39991090511046	6.66740012232834e-08	9.4441761732745e-06	cathepsin S
200	ENSSSCG00000006697	ACP6	277.011530177326	1.21301368806713	0.360937892707934	3.36072690779708	0.00077737647214151	0.0171999008721294	acid phosphatase 6, lysophosphatidic
201	ENSSSCG00000006698	BCL9	1563.90206873324	1.31233452113183	0.30743818047558	4.26861269833746	1.96692445167431e-05	0.00105252312880705	BCL9 transcription coactivator
202	ENSSSCG00000006717	PHGDH	102.704565380887	-1.44777860546066	0.483014713935022	-2.99737992175415	0.00272311112675911	0.0404768616866416	phosphoglycerate dehydrogenase
203	ENSSSCG00000006728	GDAP2	294.309108102177	1.18809652333618	0.333918830486176	3.55803990330928	0.000373632562872994	0.00981304907590214	ganglioside induced differentiation associated protein 2
204	ENSSSCG00000006743	SLC22A15	149.172213007387	1.97094314199959	0.406292068204362	4.8510500111664	1.22809572032734e-06	0.000104373688042879	solute carrier family 22 member 15
205	ENSSSCG00000006760	HIPK1	1977.07075860181	1.0365401249903	0.348714323440285	2.97246214254747	0.0029542163989934	0.042343768385572	homeodomain interacting protein kinase 1
206	ENSSSCG00000006776	MOV10	2059.50060793243	1.17989496696239	0.382704566602615	3.08304386706612	0.0020489494925635	0.033525733033474	Mov10 RISC complex RNA helicase
207	ENSSSCG00000006802	KCNA3	410.670107270371	1.38027228877958	0.471051513975004	2.93019393384823	0.00338750517213083	0.0456129307800058	potassium voltage-gated channel subfamily A member 3
208	ENSSSCG00000006811	SLC6A17	572.981636678051	-1.93872611805193	0.627976560062201	-3.08725873121744	0.00202011684550973	0.0332421961092534	solute carrier family 6 member 17
209	ENSSSCG00000006862	VCAM1	14674.0937808486	1.35909437931863	0.413381297713701	3.28775004296375	0.00100991462020452	0.0206674878650353	vascular cell adhesion molecule 1
210	ENSSSCG00000006864	CDC14A	306.197185181013	1.87954319723903	0.369300179422926	5.08947274321944	3.59060462893415e-07	3.78664639991537e-05	cell division cycle 14A
211	ENSSSCG00000006870	MFSD14A	1126.63642624452	1.03453763121604	0.302308771278232	3.4221224440223	0.000621343254527916	0.0143405229096155	major facilitator superfamily domain containing 14A
212	ENSSSCG00000006878	DPYD	681.494168071647	1.3164859511468	0.319813236137568	4.11642109327994	3.84800985698231e-05	0.00176495385440255	dihydropyrimidine dehydrogenase
213	ENSSSCG00000006890	ABCA4	13.9456334783278	-2.64966981071951	0.823266483481908	-3.21848376422789	0.0012887026623779	0.0243706493010942	ATP binding cassette subfamily A member 4
214	ENSSSCG00000006923	GBP2	5850.01058085625	4.11342014400973	0.469100784480706	8.76873431060936	1.80685840843117e-18	2.61054902850136e-15	guanylate binding protein 2, interferon-inducible [Source:NCBI gene (formerly Entrezgene)
215	NA	NA	56.9448938929301	1.97016415405201	0.6213628865378	3.17071424241261	0.00152064651952227	0.0273262449179824	NA
216	ENSSSCG00000006933	CLCA1	10.7989250671949	3.16019148429037	1.01206222380011	3.12252686640594	0.00179305739433606	0.0307673316310776	chloride channel accessory 1
217	ENSSSCG00000006994	PCM1	2582.67357611236	0.925880936083005	0.310745998290053	2.97954258840939	0.00288679097357684	0.0418765374826629	pericentriolar material 1
218	ENSSSCG00000007000	FAT1	7763.91233459396	2.33596357331009	0.434170902694451	5.3802858708706	7.43676490715961e-08	1.03313826325617e-05	FAT atypical cadherin 1 [Source:NCBI gene (formerly Entrezgene)
219	ENSSSCG00000007007	IDO1	1933.20271712663	3.77566630375253	0.628357630088359	6.0087856388751	1.86918067774442e-09	4.57727498848329e-07	indoleamine 2,3-dioxygenase 1
220	ENSSSCG00000007023		683.392458318259	1.31196382544985	0.405442442799664	3.23588180948809	0.00121267584409854	0.0233298809527773	lysine acetyltransferase 6A
221	ENSSSCG00000007027	SLC20A2	2627.31837615314	-1.14713371609914	0.290861342880575	-3.94391947977129	8.0160582901175e-05	0.00311254779036269	solute carrier family 20 member 2
222	ENSSSCG00000007084	BFSP1	39.0284803096902	-2.10617267191225	0.521154518772223	-4.0413593205987	5.31422576517808e-05	0.0022919383240386	beaded filament structural protein 1
223	ENSSSCG00000007236	TTLL9	19.5589744334896	-2.66146913526767	0.771364810119682	-3.45033776541444	0.000559885571124941	0.0132323116720241	tubulin tyrosine ligase like 9
224	ENSSSCG00000007243	PLAGL2	678.443569233944	1.36365275631857	0.368444558177831	3.70110706224734	0.000214660874355943	0.00655691398032697	PLAG1 like zinc finger 2
225	ENSSSCG00000007311	PHF20	968.718163567266	0.975060818123502	0.326430143521592	2.98704282516423	0.00281690259739805	0.0413463151773137	PHD finger protein 20
226	ENSSSCG00000007331	RBL1	361.532397035903	1.24979297267014	0.330393234597116	3.7827438391532	0.000155109020666618	0.00517555457411384	RB transcriptional corepressor like 1
227	ENSSSCG00000007355		7420.08066553903	1.2723710504346	0.350088764062283	3.63442412624314	0.000278602229406463	0.00787719180130055	DNA topoisomerase I
228	ENSSSCG00000007432	ZNF335	328.625635213933	1.01768271117519	0.326062390873157	3.12112877676554	0.00180159232239297	0.0308197641527476	zinc finger protein 335
229	ENSSSCG00000007463	PTGIS	748.78623214696	-1.33632141357161	0.278510146403646	-4.79810675060604	1.60172411055764e-06	0.000127854751101308	prostaglandin I2 synthase
230	ENSSSCG00000007508	ZBP1	2802.81964569485	2.24333142549796	0.603531393334395	3.71700867639044	0.000201595522732712	0.00626376798374671	Z-DNA binding protein 1
231	ENSSSCG00000007527		61.2789455433285	-2.39953851191078	0.562464119456073	-4.26611836899256	1.9890327752139e-05	0.00105652740942244	endothelin 3
232	ENSSSCG00000007557	MICALL2	662.17466959153	-1.61472836593935	0.406272866052862	-3.97449227074211	7.05295524822204e-05	0.00283847068039866	MICAL like 2
233	ENSSSCG00000007678		24.8498229099224	-2.13953356201653	0.657365826411241	-3.25470761645291	0.00113509159496706	0.0223735380137572	collagen type XXVI alpha 1 chain
234	NA	NA	630.401002434706	1.39686693543429	0.296244211061867	4.71525479072593	2.41408466344235e-06	0.000183572080091658	NA
235	ENSSSCG00000007789	SRCAP	256.420230640841	1.49382833751282	0.4801832889501	3.11095444570553	0.00186483705320863	0.0313657342779491	Snf2 related CREBBP activator protein
236	ENSSSCG00000007808	NFATC2IP	533.736111485116	1.64628458471889	0.337361867300373	4.87987749739689	1.06151755547392e-06	9.12905097707573e-05	nuclear factor of activated T cells 2 interacting protein
237	ENSSSCG00000007854	DCUN1D3	934.242241116105	1.24506423532774	0.354413474330952	3.51302736917133	0.000443031838455879	0.0109417504307872	defective in cullin neddylation 1 domain containing 3
238	ENSSSCG00000007901	CIITA	556.390014594512	1.13649247759236	0.388346321444455	2.9264921922401	0.00342808110554421	0.0460734100585141	class II major histocompatibility complex transactivator
239	ENSSSCG00000007924	UBN1	2487.97290693772	1.16408373963094	0.338253523321565	3.44145340512621	0.000578598112427048	0.0135487609859741	ubinuclein 1
240	ENSSSCG00000007927	PPL	165.180669578667	-1.75301736341391	0.386310622829821	-4.53784405557534	5.68322609007434e-06	0.000387317219572613	periplakin
241	ENSSSCG00000007932		166.519458578708	-2.45535114077686	0.569499865792695	-4.31141653977253	1.62212001186619e-05	0.000908387206645065	rogdi atypical leucine zipper
242	ENSSSCG00000008044	MLST8	232.903496270183	-1.21906865043901	0.349715572036739	-3.48588609691919	0.000490509812256773	0.0118907479320233	MTOR associated protein, LST8 homolog
243	ENSSSCG00000008051	ABCA3	412.407807885408	0.937948854444271	0.304858423606544	3.0766702895991	0.00209326698229162	0.0340337082667543	ATP binding cassette subfamily A member 3
244	ENSSSCG00000008122	ADRA2B	25.1939451373421	-2.71214889070776	0.650300990827776	-4.17060550262338	3.03791369375499e-05	0.00147783761102263	adrenoceptor alpha 2B
245	ENSSSCG00000008124	NEURL3	62.3284264969918	3.65491449802582	0.5497604466669	6.64819471859956	2.96709618535036e-11	1.20257819082045e-08	neuralized E3 ubiquitin protein ligase 3
246	ENSSSCG00000008147		4977.29328505061	-1.00145783111689	0.321961568390153	-3.11048873356003	0.00186778020796193	0.0313787074937604	four and a half LIM domains 2
247	ENSSSCG00000008168	RNF149	3696.4495887135	-0.916117792606016	0.295068146892864	-3.10476682167475	0.00190429084082822	0.0318808737755343	ring finger protein 149
248	ENSSSCG00000008239	CAPG	387.280391678442	-1.24587722995959	0.317312231649849	-3.92634479762006	8.62464986817772e-05	0.0032631823994654	capping actin protein, gelsolin like
249	ENSSSCG00000008275	TTC31	294.60561659783	1.58251123046051	0.309879789961482	5.10685524427784	3.27564487507881e-07	3.55838474850667e-05	tetratricopeptide repeat domain 31
250	ENSSSCG00000008292	TET3	656.84056029195	1.05566136595042	0.332156301170703	3.17820665219864	0.00148189088812417	0.0268300245007745	tet methylcytosine dioxygenase 3
251	ENSSSCG00000008310	EXOC6B	773.385648808639	1.21868303509793	0.276991279308922	4.39971625871571	1.08392510721942e-05	0.00066064154539581	exocyst complex component 6B
252	ENSSSCG00000008357	SPRED2	620.378625496567	1.06414944881714	0.292265065376604	3.64104224172639	0.00027153657561311	0.0077379890423239	sprouty related EVH1 domain containing 2
253	ENSSSCG00000008382	USP34	1182.49814453271	1.03323843203937	0.309938221508755	3.33369155636772	0.000857016366134313	0.0183168231625866	ubiquitin specific peptidase 34
254	ENSSSCG00000008388	REL	2526.45839526994	1.4550700802579	0.330807806164828	4.39853610810167	1.08983496435568e-05	0.00066064154539581	REL proto-onco, NF-kB subunit
255	ENSSSCG00000008397	EFEMP1	539.848513567906	-1.60712238096884	0.420138250972497	-3.82522271478216	0.000130653917290185	0.00446261890545766	EGF containing fibulin extracellular matrix protein 1
256	ENSSSCG00000008440	PIGF	991.834918351891	1.3503543266585	0.42598092475888	3.16998778154878	0.00152445347845065	0.0273606259088882	phosphatidylinositol glycan anchor biosynthesis class F
257	ENSSSCG00000008456	PLEKHH2	904.811179773204	0.974821283494292	0.310710275683747	3.13739634567639	0.00170455533002982	0.0297073768495426	pleckstrin homology, MyTH4 and FERM domain containing H2
258	ENSSSCG00000008496	EIF2AK2	3976.41260656545	1.77217044773733	0.36766845028304	4.82002316590686	1.43541552235325e-06	0.000118507905525484	eukaryotic translation initiation factor 2 alpha kinase 2
259	ENSSSCG00000008499	STRN	672.687955838305	1.13790650614054	0.340844629990926	3.33849034432736	0.000842349578267775	0.0180836058050711	striatin
260	ENSSSCG00000008545	ZNF512	91.0233218693228	-1.41225849462232	0.437118147995363	-3.23083930763108	0.00123427309538434	0.0236195730888913	zinc finger protein 512
261	ENSSSCG00000008581	NCOA1	635.30963145516	1.01055942526698	0.340172775902849	2.9707239874939	0.00297098664888205	0.0424445138166637	nuclear receptor coactivator 1
262	ENSSSCG00000008621	NBAS	238.399696290482	1.05820802501416	0.330743603789809	3.19948144994714	0.0013767504663973	0.0255241936924801	NBAS subunit of NRZ tethering complex
263	ENSSSCG00000008629	ROCK2	4806.98781961849	1.10171345038983	0.315762792405447	3.48905405224313	0.000484733120230375	0.0117902762981287	Rho associated coiled-coil containing protein kinase 2
264	ENSSSCG00000008647	CMPK2	3522.44501124104	2.57419730366988	0.43656331645018	5.89650391288349	3.7128395807465e-09	8.65211391332669e-07	cytidine/uridine monophosphate kinase 2
265	ENSSSCG00000008664	LRATD1	336.304625827966	1.18944375599219	0.366483973432827	3.2455546278075	0.0011722207164476	0.0228559310542982	LRAT domain containing 1
266	ENSSSCG00000008703	ADRA2C	25.1693038039376	-2.9208432606118	0.9813502233101	-2.97635155241497	0.00291700265086333	0.0421867848213288	adrenoceptor alpha 2C
267	ENSSSCG00000008723	HTRA3	935.603113920601	-1.30983513965968	0.303323970732302	-4.31827110959085	1.57256192053813e-05	0.000890995083448428	HtrA serine peptidase 3
268	ENSSSCG00000008729	LYAR	519.776863482883	1.25019378780885	0.31322834076683	3.99131759517096	6.57072160599052e-05	0.0026969825500952	Ly1 antibody reactive
269	ENSSSCG00000008768	ARAP2	404.470591558001	2.16454644356183	0.415385631354149	5.21093239673566	1.87893915067614e-07	2.18926716523943e-05	ArfGAP with RhoGAP domain, ankyrin repeat and PH domain 2
270	ENSSSCG00000008771	C4orf19	129.911413200433	2.11225606800434	0.531771154039228	3.97211479404263	7.12373739676187e-05	0.0028510736262719	chromosome 8 C4orf19 homolog
271	ENSSSCG00000008812	ATP10D	1054.95643244086	1.56420378935145	0.3024152682117	5.17237042494978	2.31142781888369e-07	2.58879915714973e-05	ATPase phospholipid transporting 10D (putative)
272	ENSSSCG00000008820	TEC	171.250495771608	1.50772096182633	0.424743827978438	3.54971835377173	0.000385643498445535	0.0100031907819409	tec protein tyrosine kinase
273	ENSSSCG00000008826	FRYL	1159.14705093503	1.22727749990254	0.309297688224634	3.96794915263384	7.24937958782887e-05	0.00288537290041189	FRY like transcription coactivator
274	ENSSSCG00000008835	RASL11B	201.836514250889	2.10306446409776	0.450938125249798	4.66375395279066	3.10492595406378e-06	0.000228877398899558	RAS like family 11 member B
275	ENSSSCG00000008881	RAPGEF2	1489.73043976904	1.50964111238674	0.27169252789205	5.55643220702248	2.75344589948133e-08	4.42019848396737e-06	Rap guanine nucleotide exchange factor 2
276	ENSSSCG00000008953	CXCL8	13916.7106641527	1.84987019226994	0.551442722188639	3.35460079140755	0.00079479592802566	0.0174782520062629	C-X-C motif chemokine ligand 8
277	ENSSSCG00000008959	CXCL2	22754.4932718034	2.45076084474129	0.348137173198875	7.03964136384044	1.92735257117611e-12	1.0313477758649e-09	chemokine (C-X-C motif) ligand 2 [Source:NCBI gene (formerly Entrezgene)
278	ENSSSCG00000008965	BTC	51.7203606174306	2.87926310155113	0.719753316980618	4.00034711007614	6.32496404969077e-05	0.00263351817262053	betacellulin
279	ENSSSCG00000008978	CXCL11	1067.88735160617	6.11302190066977	0.623129151068436	9.81020048602798	1.01766168355893e-22	2.94063520081189e-19	C-X-C motif chemokine ligand 11
280	ENSSSCG00000008980	SCARB2	7714.72581099183	0.974341874294487	0.28135508060672	3.46303280606625	0.000534123268577592	0.0127765115635911	scavenger receptor class B member 2
281	ENSSSCG00000009042	OTUD4	4962.80454349565	1.04105316105109	0.280279676392417	3.71433695960718	0.00020373717313049	0.00628973221664383	OTU deubiquitinase 4
282	ENSSSCG00000009045	HHIP	130.659292583784	2.09147459774145	0.554951637335949	3.76875110736063	0.000164066381343496	0.00539961521104971	hedgehog interacting protein
283	ENSSSCG00000009071	JADE1	240.326523820621	-1.22709800513035	0.379500466726454	-3.23345585241361	0.00122302237350387	0.023466437254162	jade family PHD finger 1
284	ENSSSCG00000009114	PRSS12	44.9494197797373	-1.87213771368671	0.48124716361855	-3.89017921603922	0.000100170215163788	0.00366394751566178	serine protease 12
285	ENSSSCG00000009129	TIFA	899.921268206132	1.99671283640425	0.481642057070662	4.14563638513675	3.38871223503229e-05	0.00161158275804072	TRAF interacting protein with forkhead associated domain
286	ENSSSCG00000009152	SGMS2	497.895052433068	1.56166573056717	0.471988827425398	3.30869215503623	0.000937328386614448	0.0196553273291808	sphingomyelin synthase 2
287	ENSSSCG00000009215	ABCG2	186.235476142295	-1.18425222011342	0.335905510644441	-3.52555162861547	0.000422601794368578	0.010647502785323	ATP-binding cassette, sub-family G (WHITE), member 2 [Source:NCBI gene (formerly Entrezgene)
288	ENSSSCG00000009216	SPP1	5939.57726590539	-3.97698008740913	0.560182243794575	-7.09943974744678	1.25263641323228e-12	7.23923635935198e-10	secreted phosphoprotein 1
289	ENSSSCG00000009229	ARHGAP24	749.437517866916	-1.48698125099483	0.355332401373818	-4.18476121300992	2.8546601894614e-05	0.00140764950229824	Rho GTPase activating protein 24
290	ENSSSCG00000009240		633.711414168999	2.8261080090278	0.63877915890733	4.42423327314252	9.67853976078679e-06	0.000616863931447056	placenta associated 8
291	ENSSSCG00000009364	FREM2	81.2390719262423	1.13119000558666	0.37914045101887	2.98356454065187	0.00284911939854566	0.0416802419204821	FRAS1 related extracellular matrix 2
292	ENSSSCG00000009422		6082.37119119891	1.63296406062488	0.345100489214601	4.73185090041825	2.22481811295903e-06	0.00017281812954856	TSC22 domain family member 1
293	ENSSSCG00000009430	AKAP11	723.745910758625	1.20105684576404	0.338801460528836	3.54501673012067	0.000392588167088791	0.0101287747108908	A-kinase anchoring protein 11
294	NA	NA	553.458372768735	1.33285911498658	0.375871158847316	3.54605317171463	0.000391047294761797	0.0101070685415357	NA
295	ENSSSCG00000009469	ACOD1	111.954883428298	2.94966192725704	0.583808196786616	5.05245034840639	4.36177765695249e-07	4.31636736901709e-05	aconitate decarboxylase 1
296	ENSSSCG00000009473	MYCBP2	2092.97691046953	1.43746684781767	0.271418745492332	5.29612221591481	1.18287684856489e-07	1.473293509316e-05	MYC binding protein 2
297	ENSSSCG00000009488	SLITRK5	22.5526168153466	-2.20868731582037	0.688010909836097	-3.21025042516628	0.00132619377940731	0.0249165770154444	SLIT and NTRK like family member 5
298	ENSSSCG00000009542	TNFSF13B	1420.57347388526	0.96731916724119	0.329017735303268	2.94002135279903	0.00328189629188111	0.044875866167764	TNF superfamily member 13b
299	ENSSSCG00000009580	S1PR3	477.530613006354	1.79532208665189	0.473279127333945	3.79336840136015	0.000148617410255426	0.004981959033342	sphingosine-1-phosphate receptor 3
300	ENSSSCG00000009627	C8orf58	253.502797164507	-1.18788388602408	0.338576818899191	-3.50846194930362	0.000450705702045013	0.0110933492046786	chromosome 14 C8orf58 homolog
301	ENSSSCG00000009672		203.971500275428	-2.15069354849309	0.528103244030613	-4.07248691009446	4.65138150283703e-05	0.00208705465692514	scavenger receptor class A member 5
302	ENSSSCG00000009682	HMBOX1	197.594972230048	1.15928657585744	0.352140962902691	3.29210940499925	0.000994389200909767	0.0205535553286757	homeobox containing 1
303	ENSSSCG00000009683	KIF13B	258.906844608689	1.86427830140966	0.351360932890836	5.30587816371966	1.12131838229015e-07	1.44650071315429e-05	kinesin family member 13B
304	ENSSSCG00000009704	HMGB2	1023.65978960738	-1.937035210684	0.563871599010501	-3.4352416650939	0.000592025621179087	0.013751746261729	high mobility group box 2
305	ENSSSCG00000009720	DDX60	1289.2129807156	3.64867223146707	0.338480153501629	10.77957509095	4.29866828272536e-27	2.07023864496054e-23	DExD/H-box helicase 60
306	ENSSSCG00000009722	SPOCK3	51.7599232827832	-1.76904753695006	0.430393183765818	-4.11030565463746	3.95135727419971e-05	0.00180662056638093	SPARC (osteonectin), cwcv and kazal like domains proteoglycan 3
307	ENSSSCG00000009776	SBNO1	1081.39579160856	0.913925332721963	0.309684566431466	2.95114911037783	0.00316594038294073	0.0440160360565987	strawberry notch homolog 1
308	ENSSSCG00000009817	P2RX7	292.499328318647	1.4237911715833	0.404453148053754	3.5202870306107	0.000431080023446609	0.0107755089597865	purinergic receptor P2X 7
309	ENSSSCG00000009825	PPTC7	1402.99217814252	0.982491755783261	0.315755680719951	3.1115568642917	0.00186103627653833	0.0313657342779491	protein phosphatase targeting COQ7
310	ENSSSCG00000009836	ACAD10	167.675133902437	-1.39006938123419	0.415546715479094	-3.34515790753283	0.000822357362766184	0.0178399687346033	acyl-CoA dehydrogenase family member 10
311	ENSSSCG00000009881	OAS2	8796.28229533057	2.57902651794112	0.387381520334594	6.65758788832655	2.78357957957148e-11	1.20257819082045e-08	2'-5'-oligoadenylate synthetase 2
312	ENSSSCG00000009885	HECTD4	659.596149264334	0.985507068083985	0.294869442069532	3.34218107229842	0.000831228168147778	0.0179578210031317	HECT domain E3 ubiquitin protein ligase 4
313	ENSSSCG00000009886	TRAFD1	4394.46308891533	0.975855752320492	0.32609655182937	2.99253624991137	0.00276669807823609	0.0407890345248521	TRAF-type zinc finger domain containing 1
314	ENSSSCG00000009921	OASL	32.2410719466808	3.85930711372875	1.0686085957634	3.61152542570718	0.000304401233292097	0.0084414376556703	2'-5'-oligoadenylate synthetase like
315	ENSSSCG00000009938	UNG	172.968870078258	1.71521076608516	0.423412433295902	4.05092205898093	5.10162000349707e-05	0.00221919915940656	uracil DNA glycosylase
316	ENSSSCG00000009951	SGSM1	65.7743194847867	-3.74510448531334	0.50277600438634	-7.44885287412314	9.41552989110034e-14	6.18343526666444e-11	small G protein signaling modulator 1
317	ENSSSCG00000009959	ASPHD2	89.9686852159629	1.80812203350848	0.514321419086726	3.51554877243717	0.000438846145761103	0.0108569334143089	aspartate beta-hydroxylase domain containing 2
318	ENSSSCG00000009968	TTC28	497.908703170539	1.88881324722912	0.373142921556352	5.06190292810867	4.15092370949043e-07	4.13603763825639e-05	tetratricopeptide repeat domain 28
319	ENSSSCG00000010033	PRR14L	1283.39322218238	0.939319641567335	0.307731924161095	3.05239582837564	0.0022702251424035	0.0358502601961227	proline rich 14 like
320	ENSSSCG00000010086		5.1139748226194	-4.96592071149603	1.63224666247705	-3.04238374361869	0.00234712462298492	0.0367004941048551	coiled-coil domain containing 116
321	ENSSSCG00000010144	ACTN2	1980.58849353298	-1.81479716280564	0.497252873107029	-3.64964640921245	0.000262601533307196	0.00754287664656536	actinin alpha 2
322	ENSSSCG00000010162	SLC35F3	8.00826908544361	-5.6354893487765	1.76847264893165	-3.18664207341908	0.0014393477647911	0.0262903874914056	solute carrier family 35 member F3
323	ENSSSCG00000010199	RET	71.6982343093291	-1.33359253764414	0.421016087542375	-3.16755719580411	0.00153725467804522	0.0274879400846502	ret proto-onco
324	ENSSSCG00000010204	BICC1	826.584839650646	1.37594865226056	0.386922073554766	3.5561389393459	0.000376345099473109	0.00983186233377445	BicC family RNA binding protein 1
325	ENSSSCG00000010210	SLC16A9	159.36093793726	-2.85064078506312	0.61617315529759	-4.6263631587234	3.72142545417025e-06	0.000269293468428863	solute carrier family 16 member 9
326	ENSSSCG00000010258	AIFM2	279.855214837829	-1.42551062141419	0.467781020997071	-3.04738875120612	0.00230838955425499	0.0362401758357259	apoptosis inducing factor mitochondria associated 2
327	ENSSSCG00000010261	PPA1	6621.31056812585	1.1826107349912	0.360391811722033	3.28145839202177	0.00103271759830113	0.0209818608614791	inorganic pyrophosphatase 1
328	ENSSSCG00000010278		137.333048956116	-1.93481023460799	0.558502861852237	-3.46427989319754	0.000531653023118727	0.012751329708269	cadherin related 23
329	ENSSSCG00000010300	MSS51	131.590974506738	-1.32742026864921	0.395077023212306	-3.35990247637328	0.000779699904342336	0.0172249299968472	MSS51 mitochondrial translational activator
330	ENSSSCG00000010332	PLAC9	378.649897577248	-1.72838560102644	0.468456125585646	-3.6895357038307	0.000224663697928254	0.00673431765076228	placenta associated 9
331	NA	NA	3479.87978880351	2.08553357157727	0.320769212968413	6.50166377339534	7.94364906731329e-11	2.86924604311356e-08	NA
332	ENSSSCG00000010448	FAS	1882.79135292032	1.81556709776989	0.412917535900952	4.39692417956645	1.09795676755978e-05	0.00066096997407099	Fas cell surface death receptor
333	ENSSSCG00000010451	IFIT2	4229.49213938805	3.55214878837777	0.572441816536083	6.20525734802581	5.46074680687091e-10	1.61014020134022e-07	interferon induced protein with tetratricopeptide repeats 2
334	ENSSSCG00000010452	IFIT1	12741.2287187272	2.95262752159344	0.444089450239371	6.64872250399537	2.9564778878377e-11	1.20257819082045e-08	interferon induced protein with tetratricopeptide repeats 3
335	ENSSSCG00000010454	IFIT5	7544.71267194475	1.96638992776533	0.3873876280698	5.07602665981636	3.85409240460103e-07	4.0350671783823e-05	interferon induced protein with tetratricopeptide repeats 5
336	ENSSSCG00000010464	PPP1R3C	5488.48228485123	1.68842301835433	0.528152729437535	3.1968461474249	0.0013893901169183	0.0257028276686756	protein phosphatase 1 regulatory subunit 3C
337	ENSSSCG00000010504	BLNK	67.6707889424439	2.07020577753725	0.563150567858001	3.67611416146038	0.000236813580844433	0.0069260781701222	B cell linker
338	ENSSSCG00000010507	TLL2	70.3596318308435	-2.01077150687443	0.447102443663342	-4.49733955913802	6.8809048761058e-06	0.000456033548853104	tolloid like 2
339	ENSSSCG00000010540	ENTPD7	285.073091315471	2.53119257432901	0.496906587515128	5.09390021771839	3.50771430134044e-07	3.74929580988371e-05	ectonucleoside triphosphate diphosphohydrolase 7
340	ENSSSCG00000010580	NFKB2	7625.40284499161	1.02836059409023	0.338194763140482	3.04073482552141	0.00236001579573944	0.0368198854097952	nuclear factor kappa B subunit 2
341	ENSSSCG00000010584	MFSD13A	24.5777886337728	-2.13676254864658	0.639827176441634	-3.33959329538028	0.000839011638881507	0.0180387502359524	major facilitator superfamily domain containing 13A
342	ENSSSCG00000010603	NEURL1	3029.10769430761	1.32696284272068	0.421729116618687	3.146481450842	0.00165247742898576	0.0289043509612424	neuralized E3 ubiquitin protein ligase 1
343	ENSSSCG00000010604	SH3PXD2A	4845.73487904874	1.91910740007096	0.357999423766566	5.36064382417084	8.29258748137006e-08	1.1289385228774e-05	SH3 and PX domains 2A
344	ENSSSCG00000010605	STN1	287.312284510832	1.14448966713341	0.382271888511477	2.99391532971446	0.00275422365121929	0.0407880106766941	STN1 subunit of CST complex
345	ENSSSCG00000010620	XPNPEP1	810.995797508245	-0.944902623386109	0.285939919551701	-3.30454951819086	0.000951291692146098	0.0199192208233722	X-prolyl aminopeptidase 1
346	ENSSSCG00000010629	ADRA2A	213.601882274072	1.99732532189203	0.408140397216076	4.8937212182763	9.89469762496294e-07	8.61196333044967e-05	adrenoceptor alpha 2A
347	ENSSSCG00000010701	BTBD16	26.4716563227793	-3.93948933189079	0.711026532936434	-5.54056585711547	3.01495826044598e-08	4.74130482352795e-06	BTB domain containing 16
348	ENSSSCG00000010706	SAMD4B	7704.29135803095	1.27216092202686	0.369763558095867	3.44047133410869	0.000580701947056085	0.0135540900340328	sterile alpha motif domain containing 4B
349	ENSSSCG00000010900	DENND1B	115.72083912253	1.16820953940011	0.348367898011456	3.35337884480301	0.000798313552437148	0.0175289273641519	DENN domain containing 1B
350	ENSSSCG00000010911	ZNF281	1019.07308798981	1.12157981081341	0.357614092405997	3.1362852712753	0.00171102682231163	0.0297842355768175	zinc finger protein 281
351	ENSSSCG00000010922	ELF3	8.14113599155664	3.81516434646168	1.26495909813836	3.01603771384898	0.00256101404080976	0.0389265848648792	E74 like ETS transcription factor 3
352	ENSSSCG00000010955	GOLM1	1366.94741934964	0.918444587635478	0.286755066729859	3.20288878627107	0.00136056512195064	0.0253972156097452	golgi membrane protein 1
353	ENSSSCG00000011004	TOPORS	2131.34708607314	1.11406852566185	0.279431233538227	3.98691481820138	6.69380443968806e-05	0.00271509325118017	TOP1 binding arginine/serine rich protein, E3 ubiquitin ligase
354	ENSSSCG00000011010	C9orf72	661.748106410665	1.37064175138269	0.432125248481644	3.17186222327603	0.00151464846887664	0.0273204008468536	C9orf72-SMCR8 complex subunit
355	ENSSSCG00000011014	BAMBI	300.404518954406	-1.67558067554527	0.409360672699804	-4.09316475003454	4.2552514934577e-05	0.00193332935778229	BMP and activin membrane bound inhibitor
356	ENSSSCG00000011020	JCAD	2712.61641049559	1.38737443109192	0.389973231424978	3.55761452144395	0.00037423795963608	0.00981304907590214	junctional cadherin 5 associated
357	ENSSSCG00000011071	THNSL1	56.2665454521374	-2.02847019484682	0.545956048844336	-3.715445957858	0.000202845617606142	0.00628908472784021	threonine synthase like 1
358	ENSSSCG00000011102	NRP1	2820.39970683339	-1.24653928038244	0.343492095534544	-3.62901882339554	0.000284500497773329	0.00798148192588167	neuropilin 1
359	ENSSSCG00000011117	UPF2	956.168487445882	1.43007335666106	0.267599189380725	5.34408702795594	9.0873902528057e-08	1.20453774653703e-05	UPF2 regulator of nonsense mediated mRNA decay
360	ENSSSCG00000011120	USP6NL	918.332616807608	1.49011431622463	0.396150493070826	3.76148545133383	0.000168907247543983	0.00548398182587744	USP6 N-terminal like
361	ENSSSCG00000011133	PFKFB3	7876.43545190397	1.8307553834944	0.469606252084218	3.89849022530918	9.67943072781522e-05	0.00357668580960292	6-phosphofructo-2-kinase/fructose-2,6-biphosphatase 3
362	ENSSSCG00000011214	NGLY1	2542.55285096185	1.56706728974957	0.302408955306185	5.18194736714372	2.19581184361337e-07	2.50906828160926e-05	N-glycanase 1
363	ENSSSCG00000011239	TRANK1	1346.31199730193	1.99174886641268	0.43611645865325	4.56701146423893	4.94726963504969e-06	0.000346981318869893	tetratricopeptide repeat and ankyrin repeat containing 1
364	NA	NA	114.081003224907	-1.49393288265703	0.399009415207129	-3.74410433869465	0.000181038415226154	0.00577404640880235	NA
365	ENSSSCG00000011277	CCK	11.5093059255509	-3.33662409524584	0.941977410659922	-3.54214873678159	0.000396881619611068	0.0101751641162317	cholecystokinin
366	ENSSSCG00000011294		64.7080104262967	-3.20059030539232	0.604762701550007	-5.29230770546731	1.20782443280314e-07	1.49150832522562e-05	golgi associated kinase 1A
367	ENSSSCG00000011298	CDCP1	3632.27036623363	1.8453628497908	0.42900757935901	4.30146910818685	1.69669431143201e-05	0.000939227563661675	CUB domain containing protein 1
368	ENSSSCG00000011340	SMARCC1	1188.4479631928	1.31672216204693	0.303836528957359	4.33365325283754	1.46655104881265e-05	0.000837499191827872	SWI/SNF related, matrix associated, actin dependent regulator of chromatin subfamily c member 1
369	NA	NA	10.4146646085966	-3.31691494500315	1.1213608877873	-2.95793707550134	0.00309705337950807	0.0435698415064582	NA
370	ENSSSCG00000011355		320.313334426768	-1.30504175192986	0.450707955291376	-2.89553742419783	0.0037850989371527	0.0492676661657498	collagen type VII alpha 1 chain
371	ENSSSCG00000011363	PRKAR2A	947.873522138315	1.06686942304592	0.356360558462489	2.99379209542411	0.00275533626941123	0.0407880106766941	protein kinase cAMP-dependent type II regulatory subunit alpha
372	ENSSSCG00000011390	IP6K1	2323.7197136626	1.41750877805316	0.319439046721463	4.43749376477813	9.10123574731473e-06	0.0005870297057018	inositol hexakisphosphate kinase 1
373	ENSSSCG00000011465	PDE12	1149.6106186167	1.24681352212982	0.366712804933774	3.39997269076814	0.000673925836396331	0.0153045247836801	phosphodiesterase 12
374	ENSSSCG00000011495	PRICKLE2	1097.71065835071	1.11044492768251	0.366073148072751	3.03339628576589	0.00241817817053653	0.0374063872417062	prickle planar cell polarity protein 2
375	ENSSSCG00000011504	EOGT	1164.53174714795	1.77620506367466	0.488926908669087	3.63286420154228	0.000280292549237488	0.00789408723466515	EGF domain specific O-linked N-acetylglucosamine transferase
376	NA	NA	618.036298990764	-1.25775623511787	0.359448061190939	-3.49913206083409	0.000466775332120729	0.0114315360298075	NA
377	ENSSSCG00000011611	HMCES	305.488559908191	1.14359405134027	0.395002361786441	2.89515750277603	0.0037896833162275	0.0492829383914085	5-hydroxymethylcytosine binding, ES cell specific
378	ENSSSCG00000011628	DNAJC13	3251.34708875007	1.32567805447854	0.336171957042174	3.94345223243063	8.03169949318707e-05	0.00311254779036269	DnaJ heat shock protein family (Hsp40) member C13
379	ENSSSCG00000011632	NPHP3	397.800124141794	-1.09282035568102	0.377956988419845	-2.89138814511635	0.00383544097021496	0.049610072638913	nephrocystin 3
380	ENSSSCG00000011666	CLSTN2	103.484077525524	2.23016237447471	0.692355564679786	3.22112291464886	0.0012768937217182	0.0242623093786912	calsyntenin 2
381	ENSSSCG00000011678	XRN1	1342.65631437709	1.04256355455319	0.294570986925986	3.53926082616936	0.000401249186288505	0.0102424880627144	5'-3' exoribonuclease 1
382	ENSSSCG00000011690	PLSCR4	690.484969848119	1.0857334846827	0.293687258196925	3.69690360878608	0.000218245160988095	0.006624382533521	phospholipid scramblase 4
383	ENSSSCG00000011746	SKIL	1824.9792233241	1.09970416048737	0.369956645981407	2.97252170607752	0.00295364324565776	0.042343768385572	SKI like proto-onco
384	ENSSSCG00000011831	APOD	562.054339289431	-3.08078670621489	0.643555462188019	-4.78713473387445	1.69179263014144e-06	0.000133568414864937	apolipoprotein D
385	ENSSSCG00000011837	MELTF	10.9883761290879	-4.64854712562523	1.54163595329172	-3.01533388326836	0.00256696508126853	0.0389265848648792	melanotransferrin
386	ENSSSCG00000011853	RUBCN	244.433662247602	1.03233631633725	0.322683068697601	3.19922678467115	0.00137796726745117	0.0255241936924801	rubicon autophagy regulator
387	ENSSSCG00000011859	HEG1	2037.00094982374	0.978704209399314	0.336687015452952	2.90686650948699	0.00365068951880985	0.048042462711874	heart development protein with EGF like domains 1
388	ENSSSCG00000011872	SEMA5B	38.8446475647765	-2.29599925745376	0.717373757928284	-3.20056209483382	0.0013715981176184	0.02547152905315	semaphorin 5B
389	ENSSSCG00000011874	PARP14	4479.08260067884	2.54062855847135	0.318340806962501	7.98084475161436	1.45335170422933e-15	1.39986836151369e-12	poly(ADP-ribose) polymerase family member 14
390	ENSSSCG00000011876	DTX3L	491.736278809887	1.96915055193134	0.442630698068487	4.44874375077044	8.63739894590717e-06	0.000559610493141107	deltex E3 ubiquitin ligase 3L
391	ENSSSCG00000011943	BBX	681.805590194434	1.75223753805362	0.33873324435685	5.17291280748241	2.30472579051369e-07	2.58879915714973e-05	BBX high mobility group box domain containing
392	ENSSSCG00000011951	NFKBIZ	6187.09370423471	1.53271939016393	0.378150924070426	4.05319488225943	5.05228808526597e-05	0.00220530085365325	NFKB inhibitor zeta
393	ENSSSCG00000012055	MORC3	1267.75006629091	1.22122356693965	0.341878281386649	3.57210046214811	0.000354129504158369	0.00948674635584857	MORC family CW-type zinc finger 3
394	ENSSSCG00000012076	MX2	16404.426815201	3.30819386852215	0.497716389955999	6.64674488379739	2.99645728609745e-11	1.20257819082045e-08	myxovirus (influenza virus) resistance 2 (mouse) [Source:NCBI gene (formerly Entrezgene)
395	ENSSSCG00000012077	MX1	11811.0204993933	2.33702723464043	0.38430440620576	6.08118771708583	1.19295526327764e-09	3.13292039686537e-07	MX dynamin like GTPase 1
396	ENSSSCG00000012132	ASB9	36.6752928471124	2.21811486983317	0.684664536536985	3.2397104734712	0.00119651124347702	0.0232042878466523	ankyrin repeat and SOCS box containing 9
397	ENSSSCG00000012241	BCOR	1226.16426682963	1.42823092788153	0.451791243853831	3.16126296671567	0.00157086611584417	0.0279850476469994	BCL6 corepressor
398	ENSSSCG00000012258	FUNDC1	2839.83515713116	1.79595152649562	0.323169828449219	5.55729950136054	2.73980415692753e-08	4.42019848396737e-06	FUN14 domain containing 1
399	NA	NA	258.679159994228	-1.35792436087681	0.394671518908692	-3.4406444240811	0.000580330630031595	0.0135540900340328	NA
400	ENSSSCG00000012265	CHST7	183.40774264127	-1.45111699406603	0.450251644952679	-3.22290214890506	0.00126898895574829	0.0241878000430756	carbohydrate sulfotransferase 7
401	ENSSSCG00000012267	JADE3	1253.74466997976	1.08064789755322	0.328431314806568	3.2903314904356	0.00100069418400071	0.0206248638665367	jade family PHD finger 3
402	ENSSSCG00000012277	TIMP1	40056.9316572491	1.09219557403803	0.365197426821832	2.99069898586901	0.0027833971743018	0.0409516521123345	TIMP metallopeptidase inhibitor 1 [Source:NCBI gene (formerly Entrezgene)
403	ENSSSCG00000012309	SHROOM4	322.978915712659	1.18862285684616	0.360892687672953	3.29356314895277	0.000989261170318211	0.0204768558578188	shroom family member 4
404	ENSSSCG00000012325	SMC1A	1627.10677668722	0.912338381076451	0.303303717519955	3.008002633586	0.00262970859085224	0.0395003802184212	structural maintenance of chromosomes 1A
405	ENSSSCG00000012328	HUWE1	4373.2854531054	1.03296900696157	0.313118230579639	3.29897433646505	0.000970387823182375	0.0202311158287719	HECT, UBA and WWE domain containing E3 ubiquitin protein ligase 1
406	ENSSSCG00000012375	DLG3	218.579469632216	3.29132362623333	0.575117098405949	5.72287562890389	1.04735939427538e-08	1.9978970552521e-06	discs large MAGUK scaffold protein 3
407	ENSSSCG00000012403	OGT	1614.03103796553	-1.02755452604518	0.336347099492018	-3.0550420312739	0.00225028983406229	0.0357662149659802	O-linked N-acetylglucosamine (GlcNAc) transferase [Source:NCBI gene (formerly Entrezgene)
408	ENSSSCG00000012474	DIAPH2	999.854522391885	1.60376474148726	0.339147613370114	4.72881034175835	2.25839220889543e-06	0.000174487971305461	diaphanous related formin 2
409	ENSSSCG00000012490	TMEM35A	59.18900527103	-1.37026244162202	0.449685359325757	-3.04715822564592	0.00231016071045844	0.0362401758357259	transmembrane protein 35A
410	ENSSSCG00000012512	ZMAT1	11.9847528971039	-4.28825739423083	1.11745638227034	-3.83751657985824	0.000124284845481153	0.0043061569484693	zinc finger matrin-type 1
411	ENSSSCG00000012532	TCEAL1	142.652632011615	-1.03295779699547	0.351547278755117	-2.938318284395	0.00329998045891362	0.0448896836292545	transcription elongation factor A like 1
412	ENSSSCG00000012713	ATP11C	1854.51730053755	1.34748006294597	0.316867382302919	4.25250479602158	2.11392687870854e-05	0.00109469589761939	ATPase phospholipid transporting 11C
413	ENSSSCG00000012743	MTMR1	1698.74570192165	1.18617137270357	0.408932301564016	2.90065462710308	0.00372384061608405	0.0486410829701957	myotubularin related protein 1
414	ENSSSCG00000012793	HCFC1	1112.94321545637	1.15848519315472	0.285070879162478	4.0638496522629	4.82699244943482e-05	0.00214758966955727	host cell factor C1
415	ENSSSCG00000012828	STARD8	831.398651740236	1.66099790258385	0.487784124882861	3.40519057069094	0.000661178960380441	0.0151150531955326	StAR related lipid transfer domain containing 8
416	ENSSSCG00000012853	IRF7	2227.13573395944	1.84073635948091	0.410307199797939	4.48623948199642	7.24912582376754e-06	0.000478243698181705	interferon regulatory factor 7
417	ENSSSCG00000012883	GAL	54.6408650961086	-2.1729923355694	0.732670455736641	-2.96585227172103	0.00301845440348133	0.0429217878257776	galanin and GMAP prepropeptide
418	ENSSSCG00000012893	UNC93B1	801.343323697578	3.11227958170071	0.517137226685269	6.01828571044808	1.76273866180335e-09	4.39104279064394e-07	unc-93 homolog B1, TLR signaling regulator
419	ENSSSCG00000012916	POLD4	549.582585646474	-0.989517419989649	0.342630443762413	-2.88800203835885	0.0038769736004315	0.0499528830187719	DNA polymerase delta 4, accessory subunit
420	NA	NA	106.745493307475	-1.78546330839885	0.542621742566095	-3.29043819725187	0.00100031473023512	0.0206248638665367	NA
421	ENSSSCG00000012956	PACS1	1478.85731009972	1.0650533509263	0.354247413917002	3.00652399730949	0.00264253195156327	0.0396050846848404	phosphofurin acidic cluster sorting protein 1
422	ENSSSCG00000012996	CDC42EP2	2438.36699564499	1.44984217110439	0.474562786742088	3.05511138169445	0.00224976954252787	0.0357662149659802	CDC42 effector protein 2
423	ENSSSCG00000012997	POLA2	447.966721651159	1.41607796767911	0.369983463826884	3.82740880641544	0.000129499338262022	0.00443366454789027	DNA polymerase alpha 2, accessory subunit
424	ENSSSCG00000013010	NAALADL1	16.8608115314377	2.19057899501515	0.713440729923457	3.07044285970352	0.00213741580571595	0.0345429346319732	N-acetylated alpha-linked acidic dipeptidase like 1
425	ENSSSCG00000013016	PPP2R5B	921.561340278506	1.49537361040265	0.363185619984585	4.11738110794727	3.83202102188098e-05	0.00176321782560944	protein phosphatase 2 regulatory subunit B'beta
426	ENSSSCG00000013050	MARK2	603.188842702581	1.08672275226466	0.281248214468013	3.86392764953269	0.000111578282768187	0.00398045192453029	microtubule affinity regulating kinase 2
427	ENSSSCG00000013088	LRRC10B	70.8242887646638	-1.83964618725565	0.485167602091164	-3.79177459361759	0.000149574643704358	0.00500244086166798	leucine rich repeat containing 10B
428	ENSSSCG00000013093	VWCE	34.8327919428785	2.36148528205265	0.772812524103524	3.05570265542993	0.00224533807044344	0.0357662149659802	von Willebrand factor C and EGF domains
429	ENSSSCG00000013114	SLC15A3	715.226457308314	2.07029572762792	0.424046427798734	4.882238339738	1.04888370467017e-06	9.07441423058358e-05	solute carrier family 15 member 3
430	ENSSSCG00000013147	FAM111B	249.399203236249	1.26154990682483	0.346345485103925	3.64246095613541	0.000270043947028617	0.00772593058746429	FAM111 trypsin like peptidase B
431	ENSSSCG00000013246	CSTPP1	59.2846495197752	-1.67720406345264	0.430983882502214	-3.89157026874207	9.95975346375025e-05	0.00365742357582905	centriolar satellite-associated tubulin polyglutamylase complex regulator 1
432	ENSSSCG00000013300	EHF	46.1861248573071	1.65279125201743	0.561583336312654	2.9430916929794	0.0032495215707267	0.0446284103173569	ETS homologous factor
433	ENSSSCG00000013313	PRRG4	379.607477208936	2.2687128396102	0.514035195136786	4.4135360011808	1.01695797511972e-05	0.000638051545094963	proline rich and Gla domain 4
434	ENSSSCG00000013332	KIF18A	167.502348750671	1.84726717871323	0.556222609458122	3.32109329484621	0.000896655592101538	0.0189398830331623	kinesin family member 18A
435	ENSSSCG00000013382	PLEKHA7	478.496066908197	1.75901516079531	0.477804896991425	3.68145067551887	0.000231910658623784	0.00682412463502329	pleckstrin homology domain containing A7
436	ENSSSCG00000013418	CFD	357.995563468736	-1.30321013272265	0.443331094703235	-2.93958657151044	0.00328650444964337	0.044875866167764	complement factor D
437	ENSSSCG00000013448	MKNK2	3677.09902156268	-1.4259019516936	0.281181217066511	-5.07111380543004	3.9549416559778e-07	4.08149978896909e-05	MAPK interacting serine/threonine kinase 2
438	ENSSSCG00000013469	ZNF555	85.4076033724768	-1.68678679730906	0.530304566597388	-3.18078874585608	0.00146874690347557	0.0266923965552391	zinc finger protein 555
439	ENSSSCG00000013490	PIP5K1C	427.391670621659	1.40618443392862	0.330374670867748	4.25633245501295	2.07807632480564e-05	0.00108000168132345	phosphatidylinositol-4-phosphate 5-kinase type 1 gamma
440	ENSSSCG00000013568	ARHGEF18	541.334253583928	0.90966375817639	0.313656033027545	2.90019531713106	0.00372930199608642	0.0486410829701957	Rho/Rac guanine nucleotide exchange factor 18
441	ENSSSCG00000013654	ICAM4	74.416444190235	1.97863285566038	0.581712845726242	3.40139103029458	0.000670438517929012	0.0152543239480919	intercellular adhesion molecule 4
442	ENSSSCG00000013655	ICAM1	7079.79369986301	1.39510121201306	0.435164277288717	3.20591851129235	0.00134632109065801	0.0251964340904493	intercellular adhesion molecule 1
443	ENSSSCG00000013751	NACC1	1011.11735943487	1.03296329624484	0.280197111191133	3.68655940760295	0.000227306397188504	0.00675745437567801	nucleus accumbens associated 1
444	ENSSSCG00000013758	ZSWIM4	436.314476775897	1.24758718871881	0.311260350462914	4.00817896292724	6.11887457462737e-05	0.00255507225012185	zinc finger SWIM-type containing 4
445	ENSSSCG00000013978	ZNF672	427.822855384079	-1.5164193744195	0.4281330259578	-3.54193505868191	0.00039720325038446	0.0101751641162317	zinc finger protein 672
446	ENSSSCG00000014080	HMGCR	1977.09579718695	1.56832346661922	0.462196157302875	3.39319884390884	0.000690814722537398	0.0156195479048831	3-hydroxy-3-methylglutaryl-CoA reductase
447	ENSSSCG00000014101	AP3B1	1357.73872164114	1.3894180578475	0.288460281254663	4.81667025978136	1.45973614257163e-06	0.000119154055298728	adaptor related protein complex 3 subunit beta 1
448	ENSSSCG00000014171	ERAP1	1261.77637263171	0.916626230925868	0.282851361266634	3.24066402516549	0.00119251643378808	0.0231578997787234	endoplasmic reticulum aminopeptidase 1
449	ENSSSCG00000014204	DCP2	888.097687455624	1.10713926342404	0.302493371719505	3.66004470488254	0.000252171249367803	0.00729742894731599	decapping mRNA 2
450	ENSSSCG00000014272	ACSL6	10.3746559751345	-3.73850690274848	1.17084374587773	-3.19300241036508	0.0014080177123489	0.0259564438083947	acyl-CoA synthetase long chain family member 6
451	ENSSSCG00000014277	IRF1	17804.8769212074	2.88799781724094	0.484487860651778	5.96092916209651	2.50807682994348e-09	6.03944900650391e-07	interferon regulatory factor 1
452	ENSSSCG00000014291	AFF4	4101.70064291793	1.51947765903593	0.434667732356132	3.49572224006495	0.000472780562148862	0.0115384012870385	ALF transcription elongation factor 4
453	ENSSSCG00000014304	SEC24A	3627.365752044	1.16214559450161	0.373751504209205	3.10940713659606	0.00187463203192571	0.0314572399503631	SEC24 homolog A, COPII coat complex component
454	ENSSSCG00000014310	CXCL14	95.5468563725466	-1.88758309351462	0.392235804700333	-4.8123681491972	1.49152273121838e-06	0.00012038838223823	C-X-C motif chemokine ligand 14
455	ENSSSCG00000014426	SPINK9	143.313669213486	3.04689432757748	0.645893363875929	4.71733338347592	2.38955951216219e-06	0.000182668549374176	serine peptidase inhibitor Kazal type 9
456	ENSSSCG00000014428	HTR4	145.051731771589	-1.4291202125073	0.473279314542065	-3.0196126654935	0.00253098138081809	0.0386958931111744	5-hydroxytryptamine receptor 4
457	ENSSSCG00000014447	SLC6A7	118.340734758211	-1.96328607490667	0.468794112163902	-4.1879495155013	2.81486109600113e-05	0.00139756402457128	solute carrier family 6 member 7
458	NA	NA	5674.19747659773	1.43276388504268	0.430459305654345	3.32845373818722	0.000873295074364107	0.0186096861864493	NA
459	NA	NA	166.029020791709	2.74875623243883	0.621337232164688	4.42393613346233	9.69186824740322e-06	0.000616863931447056	NA
460	NA	NA	2609.76304695422	2.43430460801824	0.542929042069816	4.48365148922207	7.33764676250147e-06	0.000481883274657369	NA
461	ENSSSCG00000014768	TRIM68	202.478339949231	0.909832085245581	0.308662513848558	2.94765980455916	0.00320189211690905	0.0443341371113469	tripartite motif containing 68
462	ENSSSCG00000014780	TRIM21	2080.87145086767	2.17101870182082	0.39595533539436	5.48298888221458	4.18199309575306e-08	6.22901404612785e-06	tripartite motif containing 21
463	ENSSSCG00000014794	NUP98	3623.7226599001	1.05654961445138	0.271164287886206	3.89634498955394	9.76552598159748e-05	0.00359929386178878	nucleoporin 98 and 96
464	ENSSSCG00000014820	FCHSD2	1925.34230696596	1.34879656199072	0.337587548644431	3.99539783800308	6.45857039501686e-05	0.00266609785906296	FCH and double SH3 domains 2
465	ENSSSCG00000014835	C2CD3	809.243057475003	2.17056613163986	0.410544717240495	5.28703948799894	1.24311812240453e-07	1.52208225699158e-05	C2 domain containing 3 centriole elongation regulator
466	ENSSSCG00000014851	SLCO2B1	218.732034345814	-1.51595088816554	0.370996909576459	-4.08615502996021	4.38580786079249e-05	0.00198639974836144	solute carrier organic anion transporter family member 2B1
467	ENSSSCG00000014897	FAM181B	46.9742410255952	3.71208240226884	0.649993864284268	5.7109499123601	1.12347310715771e-08	2.08101787848906e-06	family with sequence similarity 181 member B
468	ENSSSCG00000014900	RAB30	38.0278093058325	1.66529643278532	0.570925648227232	2.91683591016832	0.00353601743232648	0.0472332683210674	RAB30, member RAS onco family
469	ENSSSCG00000014921	PRSS23	4630.76420474122	-1.10656679773499	0.369713805013046	-2.99303618834559	0.00276216994840796	0.0407890345248521	serine protease 23
470	ENSSSCG00000014934	CHORDC1	3709.04104026414	1.38095326340342	0.275409384849864	5.01418375469023	5.32590703279731e-07	5.05072806401635e-05	cysteine and histidine rich domain containing 1
471	ENSSSCG00000014959	PIWIL4	48.7973891063792	-2.86150448194655	0.663645198360532	-4.311798667444	1.61931851562056e-05	0.000908387206645065	piwi like RNA-mediated silencing 4
472	ENSSSCG00000014976	ARHGAP42	265.868973299028	1.73583807265103	0.568248091730341	3.05471870106122	0.00225271702789604	0.0357662149659802	Rho GTPase activating protein 42
473	NA	NA	6168.7570245231	1.1587492411582	0.325162462532709	3.5636008908674	0.000365802005151941	0.00964957633991909	NA
474	ENSSSCG00000015014	ZC3H12C	2942.02642332307	2.99302363310735	0.331410711504489	9.03116142360057	1.69859314843917e-19	2.76993537061714e-16	zinc finger CCCH-type containing 12C
475	NA	NA	200.625388027597	-1.31898949876069	0.312067748369946	-4.22661266872433	2.37235511088088e-05	0.00120689389584532	NA
476	ENSSSCG00000015037	IL18	212.339253804149	-2.39535255396069	0.320804972916861	-7.46669396107354	8.22347237536932e-14	5.65774899425409e-11	interleukin 18
477	ENSSSCG00000015056	REXO2	2434.36366176389	-0.901758185041312	0.262335496203292	-3.43742344475759	0.000587276705759281	0.0136634039368923	RNA exonuclease 2
478	ENSSSCG00000015202	ROBO3	10.8033887089327	-2.50532849772371	0.86763461414992	-2.8875386676203	0.00388268878945742	0.0499528830187719	roundabout guidance receptor 3
479	ENSSSCG00000015299	STEAP4	1368.52065909989	2.00804232892771	0.587573000345032	3.4175197426508	0.000631945105411716	0.0145156484626208	STEAP4 metalloreductase
480	ENSSSCG00000015314	ANKIB1	1769.74626440748	1.00093324398183	0.266372117489195	3.75765021285471	0.000171516407860586	0.0055314041535039	ankyrin repeat and IBR domain containing 1
481	ENSSSCG00000015340	ASNS	2181.42996278159	-1.20322515575784	0.405891819012212	-2.96439863874575	0.00303275135097975	0.0430236828642666	asparagine synthetase (glutamine-hydrolyzing) [Source:NCBI gene (formerly Entrezgene)
482	ENSSSCG00000015350	THSD7A	46.122736664945	1.57716176102968	0.503984059855474	3.12938818239998	0.00175170728070999	0.0301932789890912	thrombospondin type 1 domain containing 7A
483	ENSSSCG00000015394	ELAPOR2	174.091677053889	1.72017136100903	0.320977526976147	5.35916447862988	8.36077117579467e-08	1.1289385228774e-05	endosome-lysosome associated apoptosis and autophagy regulator family member 2
484	ENSSSCG00000015435	NAMPT	5230.54330414624	1.38710637118638	0.316104316368008	4.38812853656675	1.14330202818892e-05	0.000679770687377513	nicotinamide phosphoribosyltransferase
485	ENSSSCG00000015445	NRCAM	106.00093830287	1.52850974007475	0.456876081987582	3.3455674313813	0.000821143899878213	0.0178399687346033	neuronal cell adhesion molecule
486	ENSSSCG00000015487	TNFSF18	41.5276722989671	-2.58594321968172	0.551467392053375	-4.68920421577969	2.7426956838667e-06	0.00020426014041498	TNF superfamily member 18
487	ENSSSCG00000015543	CACNA1E	57.6639358148271	-2.12167278012242	0.563487503043322	-3.76525258974431	0.000166380799987405	0.00545095192339687	calcium voltage-gated channel subunit alpha1 E
488	ENSSSCG00000015549	RNASEL	281.031951005696	1.53269032441007	0.47990321871435	3.19374879067516	0.00140438267179591	0.0259469575986027	ribonuclease L
489	ENSSSCG00000015579	PTGS2	15602.1773650693	3.57930627269059	0.396403828165239	9.0294442645962	1.72545807970337e-19	2.76993537061714e-16	prostaglandin-endoperoxide synthase 2
490	ENSSSCG00000015589	VASH2	3974.69014900847	0.977805903615209	0.336304796639766	2.90749912991158	0.00364331357848977	0.048042462711874	vasohibin 2
491	ENSSSCG00000015667	MBD5	265.340617278403	1.36719181693067	0.349125507514571	3.91604677258826	9.00127922804385e-05	0.00337793460485137	methyl-CpG binding domain protein 5
492	ENSSSCG00000015673	KYNU	39.7368405281167	1.76119677052333	0.544611947011824	3.23385629012853	0.00122130893674682	0.0234647227634549	kynureninase
493	ENSSSCG00000015774	TENM3	500.162758800717	1.15130564880371	0.371970221814971	3.09515542181331	0.00196709789956167	0.0325178838133491	teneurin transmembrane protein 3
494	ENSSSCG00000015782	IRF2	1508.91654206759	1.0145247122768	0.287327421112839	3.53090111743416	0.000414146541277145	0.0104975249620565	interferon regulatory factor 2
495	ENSSSCG00000015792	LRP2BP	51.0254976785643	-2.11306991042201	0.597868755683714	-3.53433741157043	0.000408798856341167	0.0103801860745469	LRP2 binding protein
496	NA	NA	84.4823370502047	-1.90926884645811	0.498036060369352	-3.83359559354429	0.000126283692843269	0.00435452695513019	NA
497	ENSSSCG00000015820	NSD3	1693.99889616398	1.47141042203254	0.312471847989387	4.70893756189684	2.490113288214e-06	0.00018836207742469	nuclear receptor binding SET domain protein 3
498	NA	NA	290.942103311979	2.1143648203049	0.31928572563333	6.62217146134824	3.53960132991752e-11	1.38216648688239e-08	NA
499	ENSSSCG00000015850	DUSP4	3683.23828851303	-1.3221709317582	0.447215643306471	-2.95645054359633	0.00311202135351258	0.0436953202289113	dual specificity phosphatase 4
500	ENSSSCG00000015878	PKP4	1558.43867354641	1.112977645983	0.366774341058511	3.03450247574829	0.00240932778001436	0.0373898687063882	plakophilin 4
501	ENSSSCG00000015897	IFIH1	3211.16166426775	1.85627846541695	0.333383844959078	5.56799165131954	2.57692168051672e-08	4.23083686819382e-06	interferon induced with helicase C domain 1
502	ENSSSCG00000015981	HOXD10	505.993962444619	1.14731606703942	0.343293598121208	3.34208407415257	0.000831518705086871	0.0179578210031317	homeobox D10
503	ENSSSCG00000016018	FRZB	2457.7113493733	3.14830602545232	0.470336815167348	6.69372654643702	2.17557796514775e-11	9.8227345126421e-09	frizzled related protein
504	ENSSSCG00000016022	ZNF804A	228.546578885682	1.65138429161809	0.329396240509895	5.01336715034086	5.34857000134622e-07	5.05072806401635e-05	zinc finger protein 804A
505	ENSSSCG00000016057	STAT1	20404.6269599364	1.19583592036371	0.326760668074407	3.65966910096844	0.000252541145740448	0.00729742894731599	signal transducer and activator of transcription 1
506	ENSSSCG00000016074	ANKRD44	724.752061997934	-2.0214932812086	0.522732589925279	-3.86716520104009	0.000110107841160545	0.00394748905480783	ankyrin repeat domain 44
507	ENSSSCG00000016101	CFLAR	3546.27030705949	1.12197422629282	0.335002036729536	3.34915643273728	0.000810580159255432	0.0176640454614215	CASP8 and FADD like apoptosis regulator
508	ENSSSCG00000016125	INO80D	571.966701262172	1.22706904626241	0.28480904688156	4.30839209532799	1.64445670185828e-05	0.000917340170982567	INO80 complex subunit D
509	ENSSSCG00000016129	CMKLR2	122.433495065202	1.96717236149339	0.602306080607501	3.26606757731758	0.00109052221683526	0.021732227570808	chemerin chemokine-like receptor 2
510	ENSSSCG00000016140	FZD5	197.794796825029	1.4966550299557	0.359610645954876	4.16187631481717	3.15643310106719e-05	0.00151697349205377	frizzled class receptor 5
511	ENSSSCG00000016164	IKZF2	52.6859271520605	1.51003126696537	0.508339664290935	2.97051631623447	0.00297299612281726	0.0424445138166637	IKAROS family zinc finger 2
512	ENSSSCG00000016173	ATIC	676.675625183438	-0.910753486583448	0.296169082414176	-3.07511330743771	0.00210422596039718	0.0341210512635448	5-aminoimidazole-4-carboxamide ribonucleotide formyltransferase/IMP cyclohydrolase
513	ENSSSCG00000016223	ACSL3	1498.23791120965	1.20593193691744	0.313212797853205	3.85020007222894	0.000118021376524542	0.00417934521575144	acyl-CoA synthetase long chain family member 3
514	ENSSSCG00000016230	EPHA4	1419.00079328049	2.00565294181663	0.63574807374661	3.15479200746429	0.00160612562077058	0.0283683410377669	EPH receptor A4
515	ENSSSCG00000016244	COL4A4	16.2331524979107	-2.97627121905188	0.975965942417429	-3.04956463099498	0.00229173317006753	0.0360685847942655	collagen type IV alpha 4 chain
516	ENSSSCG00000016260	SLC16A14	690.331968407664	-2.40743131977452	0.418580427483156	-5.75141875182731	8.84976094553179e-09	1.73719324198518e-06	solute carrier family 16 member 14
517	ENSSSCG00000016261	SP110	728.949835477101	2.0355409553261	0.373871959476091	5.4444868189059	5.19549509038543e-08	7.65964419039681e-06	SP110 nuclear body protein
518	NA	NA	185.948088610109	1.70282269482032	0.54952235867595	3.09873232259957	0.001943505265302	0.0322755908886014	NA
519	ENSSSCG00000016285	ECEL1	72.3633372528549	-2.74665175974683	0.836565241518129	-3.28324872159694	0.00102618083249022	0.0209115101097584	endothelin converting enzyme like 1
520	ENSSSCG00000016290	EFHD1	95.3926027099934	-2.47834556413846	0.672051627431414	-3.68773091676113	0.000226262733062307	0.00675422307290128	EF-hand domain family member D1
521	ENSSSCG00000016381	SNED1	400.362006223908	-1.88369297347834	0.362575673159546	-5.19530987025005	2.04379122180201e-07	2.36229564580764e-05	sushi, nidogen and EGF like domains 1
522	ENSSSCG00000016420	INSIG1	731.646744786571	1.25759578741283	0.384848406173099	3.26776924950335	0.00108398704566393	0.0216318298836361	insulin induced 1
523	ENSSSCG00000016438	NUB1	4023.70368713605	1.0942723467048	0.291553369091422	3.75324884810941	0.000174557414454892	0.00560528159754081	negative regulator of ubiquitin like proteins 1
524	ENSSSCG00000016442	AOC1	34.0883948691028	2.08959009388116	0.721005338510038	2.89816175036833	0.00375356950549499	0.0489013275161331	amine oxidase copper containing 1
525	ENSSSCG00000016450	NOS3	770.486660997851	-1.16573963628589	0.359929082907246	-3.23880367451802	0.00120032165250998	0.0232158597529641	nitric oxide synthase 3
526	ENSSSCG00000016452	GIMAP8	89.2155795063542	1.81958763288306	0.432647149133778	4.20570813080854	2.60265942794033e-05	0.00131479802149937	GTPase, IMAP family member 8
527	ENSSSCG00000016502	PARP12	2978.60164747875	2.37059455618213	0.427880031734425	5.54032527896394	3.01910329294416e-08	4.74130482352795e-06	poly(ADP-ribose) polymerase family member 12
528	ENSSSCG00000016512	ZC3HAV1	3487.59585795942	1.15576678003769	0.293562394511205	3.93703962648929	8.24929888919267e-05	0.00315306535320253	zinc finger CCCH-type containing, antiviral 1
529	ENSSSCG00000016522	PTN	2931.47666901666	-2.12073061002783	0.520496171075073	-4.07444036648245	4.61251301287886e-05	0.002076061931778	pleiotrophin
530	ENSSSCG00000016527	SLC13A4	103.281725828233	-1.40605615219717	0.3891116821551	-3.61350279798773	0.000302088093965783	0.00839340150311083	solute carrier family 13 member 4
531	ENSSSCG00000016597	POT1	251.654207194205	1.0420879575221	0.33378633428511	3.12202103706253	0.0017961410345051	0.0307836840646854	protection of telomeres 1
532	ENSSSCG00000016611	CADPS2	117.913609110541	1.98420936249614	0.614592223624561	3.22849734543378	0.00124442413835268	0.0237823279774068	calcium dependent secretion activator 2
533	ENSSSCG00000016652	LRRN3	91.7606748860004	1.82037250855334	0.439427426569896	4.14260102689287	3.43389021736245e-05	0.00161158275804072	leucine rich repeat neuronal 3
534	ENSSSCG00000016687	CHN2	379.413809951074	-1.12261120331705	0.304654084286515	-3.68487166665156	0.000228817903678869	0.00676455438758473	chimerin 2
535	ENSSSCG00000016720	PGAM2	60.3934738618005	-1.6239279678041	0.521216528931483	-3.11564940416072	0.00183540345741506	0.0310946810373197	phosphoglycerate mutase 2
536	ENSSSCG00000016794	MYO10	1022.01020195709	1.4353211581124	0.487428429401953	2.94468084242328	0.0032328795563127	0.0444420968883025	myosin X
537	ENSSSCG00000016808	C5orf22	200.271450780599	1.09651038772797	0.340625847779207	3.21910505288115	0.00128591365467749	0.0243706493010942	chromosome 16 C5orf22 homolog
538	ENSSSCG00000016850	LIFR	2459.94111330908	1.87893129148021	0.360369226545855	5.21390605266105	1.84905139162438e-07	2.1719589029422e-05	LIF receptor subunit alpha
539	ENSSSCG00000016885	ITGA1	2374.49272305062	1.13720713606708	0.368578335799962	3.08538789616835	0.00203286841361664	0.0333760032271968	integrin subunit alpha 1
540	ENSSSCG00000016892	FST	238.463445754768	1.20631362067393	0.406759413601321	2.96566860000511	0.00302025747423992	0.0429217878257776	follistatin
541	ENSSSCG00000016900	ESM1	2832.50068836115	2.73432187223289	0.636389218784024	4.29661878536767	1.73423055959271e-05	0.000952705822243172	endothelial cell specific molecule 1
542	ENSSSCG00000016915	IL31RA	14.3105923356905	-3.35089186752273	0.966837929559462	-3.46582582775746	0.000528605595045981	0.0127288227287072	interleukin 31 receptor A
543	ENSSSCG00000016922	GPBP1	2807.22056575354	1.07710919108472	0.286287362310605	3.76233579572445	0.000168333826653326	0.00547767371055687	GC-rich promoter binding protein 1
544	ENSSSCG00000016983	STC2	157.183143527866	-1.33536199889212	0.348640504809552	-3.83019752573378	0.000128040436441276	0.00439412880214622	stanniocalcin 2
545	ENSSSCG00000016986	CREBRF	664.458172781341	1.50259238755778	0.453674566090677	3.31204898812304	0.00092615326596023	0.0194775289470064	CREB3 regulatory factor
546	ENSSSCG00000017053	NIPAL4	90.2341957542647	-1.27526250702814	0.421489840485485	-3.02560675142074	0.00248134794648207	0.0380983157606514	NIPA like domain containing 4
547	ENSSSCG00000017073	FAM114A2	1364.98227795153	1.3674713488164	0.276231289431808	4.95045782695076	7.40391006127075e-07	6.72777940661885e-05	family with sequence similarity 114 member A2
548	NA	NA	7345.43214198498	3.12300772392859	0.485146294784367	6.43724945960201	1.21657900421343e-10	4.28710572021359e-08	NA
549	ENSSSCG00000017177	ST6GALNAC2	187.895753149737	-1.03312582769928	0.355412722582806	-2.9068341172243	0.00365106755659175	0.048042462711874	ST6 N-acetylgalactosaminide alpha-2,6-sialyltransferase 2
550	ENSSSCG00000017181		138.310391999508	-1.35057769819431	0.401538907864346	-3.36350393882772	0.000769597380624063	0.0170539002381234	cytoglobin
551	ENSSSCG00000017204	ITGB4	145.174289177384	-1.11688944998308	0.378509495769536	-2.95075675106214	0.00316996457893821	0.0440160360565987	integrin subunit beta 4
552	ENSSSCG00000017236	CD300C	35.9665894218922	-1.75014067381216	0.578738159295756	-3.02406303386292	0.00249404468534036	0.0382397580612325	CD300c molecule [Source:NCBI gene (formerly Entrezgene)
553	ENSSSCG00000017258	FAM20A	127.584977618024	-1.49639996796585	0.456648999321257	-3.27691502705587	0.00104947948225111	0.0211476702364911	FAM20A golgi associated secretory pathway pseudokinase
554	ENSSSCG00000017272	HELZ	835.400724268109	0.952265438825104	0.31090643707002	3.06286819854631	0.00219226593641682	0.0351151421833151	helicase with zinc finger
555	ENSSSCG00000017298	TANC2	394.069187925793	2.17901859361869	0.414244857158822	5.2602188197674	1.43884071508592e-07	1.73236422096345e-05	tetratricopeptide repeat, ankyrin repeat and coiled-coil containing 2
556	ENSSSCG00000017299	MARCHF10	34.0007292879165	-2.4491782773768	0.828960395392387	-2.95451784064725	0.00313158046503029	0.0437996849552349	membrane associated ring-CH-type finger 10
557	ENSSSCG00000017331		19.4261460428029	-2.70280338964758	0.896366624597196	-3.01528784704824	0.00256735476778064	0.0389265848648792	spermatosis associated 32
558	ENSSSCG00000017338	PLCD3	419.785427309359	-0.996395317828018	0.303535909708371	-3.28262747819633	0.00102844473585336	0.0209281261177596	phospholipase C delta 3
559	ENSSSCG00000017340	DCAKD	148.226128808905	-1.07792291234349	0.342029832506786	-3.15154647313435	0.00162408315428532	0.0285806984325387	dephospho-CoA kinase domain containing
560	ENSSSCG00000017416	DHX58	1843.08653851093	2.1697459065435	0.479970689709739	4.52058001261628	6.16704302235662e-06	0.000414425291102365	DExH-box helicase 58
561	ENSSSCG00000017420	CNP	554.356988738067	1.83282307657637	0.380495601287899	4.81693630720734	1.45779195995172e-06	0.000119154055298728	2',3'-cyclic nucleotide 3' phosphodiesterase
562	NA	NA	12.6709495000064	-4.31105745999939	1.06931385388176	-4.03161096655545	5.53958302487505e-05	0.00236792590365073	NA
563	ENSSSCG00000017466	CCR7	128.807281488866	2.39723257297916	0.519425676931497	4.61515993421963	3.92792715278786e-06	0.000280944017343956	C-C motif chemokine receptor 7
564	ENSSSCG00000017488	CSF3	1400.19188584635	3.16755785291693	0.597278731375427	5.30331600059256	1.13717819635697e-07	1.45397792751907e-05	colony stimulating factor 3
565	ENSSSCG00000017504	CDK12	2560.2494852921	0.992971453022352	0.258739945927673	3.83771995260416	0.000124181987680981	0.0043061569484693	cyclin dependent kinase 12
566	ENSSSCG00000017513	NPEPPS	1594.10640951527	0.925450451400168	0.28910633907466	3.20107284524528	0.00136916913243799	0.0254591449491171	aminopeptidase puromycin sensitive
567	ENSSSCG00000017517	TBX21	30.4078897339864	2.62904555300539	0.703276183081061	3.73828321824793	0.000185281156519371	0.00588338933932281	T-box transcription factor 21
568	ENSSSCG00000017614	TRIM25	5314.76257774511	2.40101035298617	0.339424266638901	7.07377341273157	1.5077640997408e-12	8.3785291204058e-10	tripartite motif containing 25
569	ENSSSCG00000017668	VMP1	2821.40501872835	-1.24353450086992	0.31170646992727	-3.98944077471369	6.62292525420957e-05	0.00271070889724702	vacuole membrane protein 1
570	ENSSSCG00000017672	MED13	3067.04243012987	1.06454396792903	0.325589669684421	3.26958766523778	0.00107704357685392	0.02155280553793	mediator complex subunit 13
571	ENSSSCG00000017747	RAB11FIP4	52.1754269193611	-1.9053871395955	0.631343296579731	-3.01798902422475	0.00254458120508023	0.0388216570760287	RAB11 family interacting protein 4
572	ENSSSCG00000017748	NF1	2330.44130918656	1.27183285822811	0.329961416381521	3.85448963147117	0.00011597129800277	0.00411683860821628	neurofibromin 1
573	ENSSSCG00000017754		958.032767547288	1.85697909806054	0.507188214004097	3.6613214715702	0.000250917679607754	0.00727963581319844	galectin 9 [Source:NCBI gene (formerly Entrezgene)
574	ENSSSCG00000017773	SUPT6H	6064.83085532522	0.923468357894525	0.270797919892012	3.41017522683625	0.000649211540267387	0.0148649894354726	SPT6 homolog, histone chaperone and transcription elongation factor
575	ENSSSCG00000017804	ABR	2029.29420650853	1.47598689206302	0.314902439212733	4.68712435430172	2.77070625835582e-06	0.000205288020619102	ABR activator of RhoGEF and GTPase
576	ENSSSCG00000017869	ITGAE	173.625363464566	-2.00251757242121	0.555379701283008	-3.6056729617505	0.000311345037454556	0.00855192604780119	integrin subunit alpha E
577	ENSSSCG00000017876	CYB5D2	92.1185100366455	-1.61572708106521	0.475538986827738	-3.39767532383313	0.000679610247799762	0.0153902960191394	cytochrome b5 domain containing 2
578	ENSSSCG00000017886	FBXO39	1035.92730056919	2.08633509077274	0.527349115207575	3.95626925428996	7.61293519481223e-05	0.00298890455691976	F-box protein 39
579	ENSSSCG00000017924	PELP1	1878.45007841073	1.33629124535914	0.405709385175902	3.29371538886085	0.000988725568109184	0.0204768558578188	proline, glutamate and leucine rich protein 1
580	ENSSSCG00000017934	CLDN7	14.9953700477476	-3.0328002388717	0.797046006945875	-3.80505041420733	0.000141775311319031	0.0048083795726229	claudin 7
581	ENSSSCG00000018032	TRPV2	93.1895633790716	-1.83569906824361	0.494575120732021	-3.71166884724528	0.000205897249722647	0.00634286452876929	transient receptor potential cation channel subfamily V member 2
582	ENSSSCG00000018042	SLC47A2	67.6773367654359	-3.09069182057539	0.529492694587279	-5.83708113854993	5.3123229610958e-09	1.12871238443988e-06	solute carrier family 47 member 2
583	ENSSSCG00000018044	ALDH3A1	100.380900595223	-1.88175715433097	0.507707195283324	-3.7063826784666	0.00021024055859055	0.0064354991324497	aldehyde dehydrogenase 3 family member A1
584	ENSSSCG00000018057	SOCS7	439.562396958478	1.08482438450257	0.300562299461034	3.60931622644581	0.000307005177315646	0.00844878247972658	suppressor of cytokine signaling 7
585	ENSSSCG00000018372	SNORD86	23.591904451993	-1.91195843011175	0.656540016135297	-2.91217348999751	0.00358923223238495	0.0476557088138531	small nucleolar RNA, C/D box 86
586	NA	NA	18.3658673713773	-2.00377023799032	0.656389521894572	-3.05271515030699	0.00226781095933005	0.0358502601961227	NA
587	ENSSSCG00000018923	SNORD21	57.1058049277711	-2.37661864700591	0.538566541232265	-4.41285981406883	1.02014055175067e-05	0.000638051545094963	Small nucleolar RNA SNORD21 [Source:RFAM
588	ENSSSCG00000019224	SNORD93	17.0084856157274	-2.22484892303808	0.746535566791492	-2.98023164870789	0.00288030479223334	0.0418658386702086	small nucleolar RNA, C/D box 93
589	NA	NA	13.4929871740561	3.52797917918708	0.928637628529473	3.79909134715309	0.000145227561617456	0.00489102053671096	NA
590	ENSSSCG00000020666	EHD4	2133.44146186422	1.47851337874609	0.465353820838368	3.17718113087037	0.00148714124571644	0.0268913851290502	EH domain containing 4
591	ENSSSCG00000020701	TTC9	333.897070450369	1.11116886100539	0.358532989972899	3.09920953463553	0.00194037737349747	0.0322755908886014	tetratricopeptide repeat domain 9
592	ENSSSCG00000020720	IRAG1	3273.40659317741	-0.94682387555995	0.318321237079569	-2.97442886389411	0.00293534506642915	0.0423252150895892	inositol 1,4,5-triphosphate receptor associated 1
593	ENSSSCG00000020783	SLC41A1	4910.09556116025	1.18732898844534	0.30939722065003	3.83755544393971	0.000124265183378212	0.0043061569484693	solute carrier family 41 member 1
594	ENSSSCG00000020803	BRPF3	1172.27968456919	1.08580476973277	0.2941990305101	3.69071498247337	0.000223624597812649	0.00671710642244729	bromodomain and PHD finger containing 3
595	ENSSSCG00000020895	BICDL2	93.9874097100132	-1.95199436677862	0.60604209091792	-3.2208891032999	0.00127793586912957	0.0242623093786912	BICD family like cargo adaptor 2
596	ENSSSCG00000020906	GHSR	2043.12519449712	2.82593592104587	0.481070057812314	5.87427106541806	4.24707950299744e-09	9.4402776398934e-07	TNF superfamily member 10 [Source:NCBI gene (formerly Entrezgene)
597	ENSSSCG00000020967		101.271102594596	-1.38890671979273	0.44817177512877	-3.09904995555256	0.00194142282168947	0.0322755908886014	CD300H molecule
598	ENSSSCG00000020970	IL6	4714.98326005535	2.3322340765636	0.407785082341195	5.71927266974473	1.06980999426498e-08	2.00735257105719e-06	interleukin 6
599	ENSSSCG00000020984	LXN	372.204271075309	-1.6941364344659	0.518007966939194	-3.27048335660977	0.00107363859792005	0.0215144666612329	latexin
600	ENSSSCG00000021040	SLC26A11	106.659164970433	1.38022254568981	0.425836011316217	3.24120672984815	0.00119024833257175	0.0231449635383534	solute carrier family 26 member 11
601	ENSSSCG00000021343		4894.82210969836	0.968791321146685	0.33536867498968	2.88873527372972	0.00386794552854264	0.0499387079956988	zinc finger E-box binding homeobox 2
602	ENSSSCG00000021359	CDC42EP3	2411.40562447883	-1.20421732652147	0.370373812189279	-3.2513565670406	0.00114855712472805	0.0225466757310745	CDC42 effector protein 3
603	ENSSSCG00000021383	CGAS	123.876103460325	2.19454666178966	0.40683328657392	5.39421609345359	6.8823351353436e-08	9.65397845004314e-06	cyclic GMP-AMP synthase
604	ENSSSCG00000021453	RIMS4	52.1487874221564	-2.51582577570235	0.806718638790932	-3.11859135853479	0.0018171779622439	0.0309241309758537	regulating synaptic membrane exocytosis 4
605	ENSSSCG00000021475	SLC4A2	574.881427516612	1.27111411536747	0.287293952911098	4.42443741849594	9.66939277329387e-06	0.000616863931447056	solute carrier family 4 member 2
606	ENSSSCG00000021494	CDC25A	590.116125999967	1.24510814769906	0.383875894765286	3.24351740934491	0.00118063595322355	0.0229889868627679	cell division cycle 25A
607	ENSSSCG00000021540	C2CD4D	12.162735395864	-3.71050910031193	0.972568729584047	-3.81516389273472	0.000136092578127317	0.00462650722066701	C2 calcium dependent domain containing 4D
608	ENSSSCG00000021569	MMP25	374.500545948032	-1.8374368870625	0.545299593115374	-3.36959152411057	0.000752796865194915	0.0167845819573089	matrix metallopeptidase 25
609	ENSSSCG00000021620	STIP1	1756.98465490591	1.20327396315985	0.280125175071209	4.29548669752362	1.74310490027577e-05	0.000953953772696377	stress induced phosphoprotein 1
610	NA	NA	86.4862488733624	-1.62740520565849	0.420083510817308	-3.87400401051743	0.000107061649299839	0.00385742321467352	NA
611	ENSSSCG00000021712	HERC6	11116.6682320049	2.19610078894387	0.497582670911137	4.41353953288311	1.01694137754974e-05	0.000638051545094963	HECT and RLD domain containing E3 ubiquitin protein ligase family member 6
612	NA	NA	75.5612732770142	-1.62704641189927	0.519722543327025	-3.13060580648217	0.00174446145627101	0.030166558944169	NA
613	ENSSSCG00000021815		601.975477511277	2.19107323812558	0.42715850360771	5.12941500548424	2.90643960335517e-07	3.19208868671257e-05	interleukin 15 receptor subunit alpha
614	ENSSSCG00000022011	NMI	811.527032021023	2.08798054550083	0.335284238976537	6.2274938776557	4.73955255234059e-10	1.42660531825452e-07	N-myc and STAT interactor
615	ENSSSCG00000022083	ANKS1B	103.660598542772	-2.01647302411925	0.473647967772401	-4.25732434491983	2.06888097737612e-05	0.00108000168132345	ankyrin repeat and sterile alpha motif domain containing 1B
616	ENSSSCG00000022089	ADGRF4	399.873093512433	1.47201627504284	0.373359578183515	3.94262357538691	8.05950993804673e-05	0.00311347057713634	adhesion G protein-coupled receptor F4
617	ENSSSCG00000022312	RHPN2	136.596230445788	2.61407160433746	0.463887692404124	5.63513895096007	1.74917243864379e-08	3.04482450524403e-06	rhophilin Rho GTPase binding protein 2
618	ENSSSCG00000022331		264.307616747827	-0.981597298200347	0.322871674201791	-3.04020877838561	0.00236414202993385	0.0368198854097952	fibroblast growth factor 13
619	ENSSSCG00000022402	GRAMD2B	7136.25373378225	1.27451397028239	0.305422817201754	4.17294942781069	3.00681700905301e-05	0.00146993106959986	GRAM domain containing 2B
620	ENSSSCG00000022413	TIRAP	720.360218807191	1.40150407580485	0.44254958893676	3.16688595095527	0.00154080733777023	0.0275174096614392	TIR domain containing adaptor protein
621	ENSSSCG00000022478	STK10	1700.58196020555	1.66206043665244	0.30681641046131	5.4171171423115	6.05676607366116e-08	8.75081562322565e-06	serine/threonine kinase 10
622	ENSSSCG00000022616	DCP1A	1659.28633974097	1.03148891315857	0.318455128282957	3.23904004535943	0.00119932733311826	0.0232158597529641	decapping mRNA 1A
623	ENSSSCG00000022719	RAB20	27.2650483935513	-1.93634809479814	0.602531285295903	-3.21368888562724	0.00131041575970817	0.02465219647951	RAB20, member RAS onco family
624	ENSSSCG00000022741	PDGFRB	3755.88062476825	-0.905025344430117	0.304437157052088	-2.97278214391967	0.00295113835982229	0.042343768385572	platelet derived growth factor receptor beta
625	ENSSSCG00000022797	PPP1R3B	942.111555893802	-1.25464258398723	0.404743169156438	-3.09984869319017	0.00193619524225676	0.0322755908886014	protein phosphatase 1 regulatory subunit 3B
626	NA	NA	573.631506933874	2.69696979435407	0.327517544353268	8.23458114184276	1.80186950334496e-16	1.859529327452e-13	NA
627	ENSSSCG00000022895	CRYBG3	1269.59055465482	1.05103059908909	0.32673956386652	3.21672278266998	0.00129663819979524	0.0244248092707192	crystallin beta-gamma domain containing 3
628	ENSSSCG00000022942	PHF6	1145.58055960938	1.78683058334757	0.277825924349077	6.43147534750029	1.26371280709144e-10	4.34717205639454e-08	PHD finger protein 6
629	ENSSSCG00000023032	SCG2	19.3799444746685	-3.49864448271416	1.0320246405588	-3.39007843923164	0.000698726279108837	0.0157491377231895	secretogranin II
630	ENSSSCG00000023126	TARDBP	2213.54403823151	1.09149281929293	0.357236790004924	3.05537629334842	0.00224778309554434	0.0357662149659802	TAR DNA binding protein
631	ENSSSCG00000023160	SMIM29	201.708211834239	-1.25592283237872	0.381773993059386	-3.28970242921538	0.00100293386085228	0.0206415789481392	small integral membrane protein 29
632	ENSSSCG00000023178	BATF2	562.850906677076	3.64834782748772	0.427942993996719	8.52531266703174	1.52397595615189e-17	1.94641731661741e-14	basic leucine zipper ATF-like transcription factor 2
633	ENSSSCG00000023186	CA4	9.65639375156163	-3.68823954820825	1.21151968384547	-3.04430839827666	0.00233215932428593	0.0365455942703721	carbonic anhydrase 4
634	NA	NA	110.905063660726	1.39128892255325	0.416570249616745	3.33986626225293	0.000838187435845645	0.0180387502359524	NA
635	ENSSSCG00000023229	ETV5	814.317422865083	-1.57977484056961	0.409704958880521	-3.85588410959484	0.000115312110733823	0.00410352063025192	ETS variant transcription factor 5
636	ENSSSCG00000023320		182.864358042896	1.81626923793432	0.319239027380824	5.68937091694517	1.27508233544744e-08	2.33194804842338e-06	cytochrome P450 family 3 subfamily A member 22 [Source:NCBI gene (formerly Entrezgene)
637	ENSSSCG00000023333	FCN2	60.4997947636538	-3.68856780817317	0.866544337038221	-4.25664060165738	2.0752154830375e-05	0.00108000168132345	ficolin (collagen/fibrinogen domain containing lectin) 2 (hucolin) [Source:NCBI gene (formerly Entrezgene)
638	ENSSSCG00000023351	PLA2G4A	871.666801248178	1.46908819947118	0.384725524518833	3.81853582838968	0.000134246089339691	0.00457449881787703	phospholipase A2 group IVA
639	ENSSSCG00000023362	RHBDF2	737.866657670808	1.39037486327928	0.478028181193925	2.9085625450087	0.00363094538518815	0.0479962478730086	rhomboid 5 homolog 2
640	ENSSSCG00000023379	UBE2L6	2472.57775635254	1.95316704358768	0.390101267016066	5.00682055848651	5.53364695564664e-07	5.19156696202484e-05	ubiquitin conjugating enzyme E2 L6
641	ENSSSCG00000023400	ZNF598	1978.1942085011	1.1569670868264	0.294430092497694	3.92951371584226	8.51178217212065e-05	0.00324480814835882	zinc finger protein 598, E3 ubiquitin ligase
642	ENSSSCG00000023408	SAMD4A	5129.31550415846	0.948043130676576	0.320814698146229	2.9551112718796	0.00312556300306962	0.0437996849552349	sterile alpha motif domain containing 4A
643	ENSSSCG00000023419	ARHGEF10	129.082581215723	1.75998352128051	0.446755111580656	3.93948155411931	8.16578798448993e-05	0.00313269623257022	Rho guanine nucleotide exchange factor 10
644	ENSSSCG00000023503	PRKCD	210.984794777066	1.17540225169031	0.316429572062713	3.71457776221168	0.000203543272707518	0.00628973221664383	protein kinase C delta
645	ENSSSCG00000023527	NRROS	108.450764530031	-1.66419153227892	0.415029063887767	-4.009819256246	6.07652434046001e-05	0.00254474271510047	negative regulator of reactive oxygen species
646	ENSSSCG00000023539	MBOAT2	1091.17021629793	1.05989799463441	0.360884424182311	2.93694580206924	0.00331462026892928	0.0449246094235369	membrane bound O-acyltransferase domain containing 2
647	ENSSSCG00000023604	LAP3	3038.93640471247	1.50161258739603	0.32460205942025	4.62601066080098	3.72776119087573e-06	0.000269293468428863	leucine aminopeptidase 3
648	ENSSSCG00000023607	CYP4F22	25.9971118675279	-2.35736168940303	0.668418616154779	-3.52677443809728	0.000420654963538814	0.0106252148832321	cytochrome P450 family 4 subfamily F member 22
649	NA	NA	104.220765119215	-3.75676304428302	0.650686277291433	-5.77353968477872	7.76233135690339e-09	1.55764115895195e-06	NA
650	ENSSSCG00000023716	TNFAIP6	1112.71021343347	1.34313710154122	0.430956532016091	3.11664170689741	0.00182923742441162	0.0310741874188569	TNF alpha induced protein 6
651	ENSSSCG00000023739	SNORD96	54.0278821716954	-1.45326920793241	0.437233269676242	-3.32378459902768	0.000888047587139751	0.0188406924214319	Small nucleolar RNA SNORD96 family [Source:RFAM
652	ENSSSCG00000023915	SLC2A4	22.4914392512769	-2.53678470122553	0.645834119455738	-3.92791991752208	8.56837304837502e-05	0.00325778562639269	solute carrier family 2 member 4
653	ENSSSCG00000023974	PHF21A	684.071758426778	1.06160749656196	0.345214185903395	3.07521399731539	0.00210351565610369	0.0341210512635448	PHD finger protein 21A
654	ENSSSCG00000024022	TRPC6	2831.58870316734	1.49048512829528	0.465463457316849	3.20215283254918	0.00136404607571961	0.0254293389703186	transient receptor potential cation channel subfamily C member 6
655	ENSSSCG00000024096	RIPK2	1932.71276320152	1.97149594562495	0.335563957507912	5.87517193522926	4.22404703807903e-09	9.4402776398934e-07	receptor interacting serine/threonine kinase 2
656	ENSSSCG00000024158	ANO1	170.280140510152	-1.93980200441237	0.429009667769679	-4.52158109745392	6.13794356361245e-06	0.000414397236481648	anoctamin 1
657	ENSSSCG00000024219	TIGAR	719.848121463544	2.50815187930351	0.425732604234439	5.89137842475965	3.82987374892878e-09	8.78317713087668e-07	TP53 induced glycolysis regulatory phosphatase
658	ENSSSCG00000024233	RAB39B	22.3807609580908	-2.28736827142986	0.6829105500888	-3.34944052501814	0.000809749380991869	0.0176640454614215	RAB39B, member RAS onco family
659	ENSSSCG00000024305	MT3	6.52317955134181	-6.31133554042543	1.56623329520561	-4.02962672275263	5.5865493267787e-05	0.00238095765997931	metallothionein 3
660	ENSSSCG00000024384	DCAF12	1942.27055791193	0.909537894449144	0.29472902436633	3.08601399677096	0.00202859272706548	0.033343694790264	DDB1 and CUL4 associated factor 12
661	ENSSSCG00000024385	RNASEH2B	965.110310280531	1.17022298661887	0.376155128116081	3.11101165223977	0.00186447581980789	0.0313657342779491	ribonuclease H2 subunit B
662	ENSSSCG00000024389	SIGIRR	67.6288882276456	-1.93232330389009	0.441790086344146	-4.37384939956496	1.22074609973088e-05	0.000716965026378526	single Ig and TIR domain containing
663	ENSSSCG00000024431	ATG9B	17.82438295224	-3.17290451990839	0.783372066534442	-4.05031613387109	5.11484856092458e-05	0.00221919915940656	autophagy related 9B
664	ENSSSCG00000024480	SFMBT2	676.299622494328	2.35496868884583	0.324459762160477	7.25812246537081	3.92500122473308e-13	2.46558337804102e-10	Scm like with four mbt domains 2
665	ENSSSCG00000024614	ITSN1	1825.96719505854	1.88325750604084	0.322046508017811	5.84778117183213	4.98173310792905e-09	1.08659420218706e-06	intersectin 1
666	ENSSSCG00000024633	JAKMIP3	138.358437121681	-4.40644823732745	1.32636288419724	-3.32220411911963	0.000893093344464728	0.0189199598839097	Janus kinase and microtubule interacting protein 3
667	ENSSSCG00000024759	CX3CL1	148.638108382277	1.82018068821614	0.575238353423882	3.16421997487168	0.00155499218173342	0.0277364531378821	C-X3-C motif chemokine ligand 1
668	ENSSSCG00000024771	TICAM1	1374.89623207997	1.04866531898488	0.325961964428561	3.21714013726503	0.00129475340130313	0.0244248092707192	toll like receptor adaptor molecule 1
669	ENSSSCG00000024867	ISG20	45.3139070739818	3.05238180916913	0.630457879760076	4.84153169809016	1.28842117810156e-06	0.000108089177153847	interferon stimulated exonuclease 20 [Source:NCBI gene (formerly Entrezgene)
670	ENSSSCG00000024954	FGF1	172.670077729645	-3.32654720059097	0.523605184586091	-6.35315940047577	2.10936932997348e-10	7.08748094871088e-08	fibroblast growth factor 1
671	ENSSSCG00000024973	GBP1	58171.8295299231	3.37000367137873	0.397016470812841	8.48832207006192	2.09641902056816e-17	2.32992784685914e-14	guanylate binding protein 1, interferon-inducible [Source:NCBI gene (formerly Entrezgene)
672	ENSSSCG00000025156	BRWD3	300.289858373969	1.3915197701891	0.372632638363766	3.73429385117545	0.00018824260678486	0.00593056268824163	bromodomain and WD repeat domain containing 3
673	ENSSSCG00000025182	ELK4	1121.44982973767	1.11003245921877	0.376425979015856	2.94887314133017	0.00318934863668325	0.0442223695804219	ETS transcription factor ELK4
674	ENSSSCG00000025206	RNF19B	22786.0722586293	3.37181878307964	0.372379838201441	9.05478341514192	1.36839077715015e-19	2.76993537061714e-16	ring finger protein 19B
675	NA	NA	2086.12822208002	1.1518541966807	0.323655163625925	3.55889331032577	0.000372420767186567	0.00980097494410114	NA
676	ENSSSCG00000025286	MCTP1	680.665395768017	1.25360955705381	0.394367442117455	3.17878562774573	0.00147893425795848	0.0268100905382486	multiple C2 and transmembrane domain containing 1
677	ENSSSCG00000025308	IL17D	178.529002795868	-1.42964597951159	0.422459606612013	-3.38410100548281	0.000714117271984397	0.0160459818750086	interleukin 17D
678	ENSSSCG00000025561	VASN	851.432039296508	-0.937229328254822	0.314924277652058	-2.97604660790971	0.00291990481875199	0.0421867848213288	vasorin
679	ENSSSCG00000025593	TAP2	4414.28101203803	1.46158902590485	0.288711675196767	5.06245209830439	4.13898080727489e-07	4.13603763825639e-05	transporter 2, ATP binding cassette subfamily B member [Source:NCBI gene (formerly Entrezgene)
680	ENSSSCG00000025618	TAP1	9790.74104414408	2.44518359267631	0.318518642253529	7.67673620412472	1.63193004017194e-14	1.38694854237671e-11	transporter 1, ATP binding cassette subfamily B member
681	ENSSSCG00000025672	RAVER2	99.1975138038384	-1.83439579343946	0.556954460915799	-3.29361899790364	0.000989064654370124	0.0204768558578188	ribonucleoprotein, PTB binding 2
682	ENSSSCG00000025689	DVL2	320.305838696111	1.2441056978905	0.382973976663833	3.24853847441063	0.00115999520233512	0.0226787695309038	dishevelled segment polarity protein 2
683	ENSSSCG00000025855	RNMT	1799.05695356012	0.914726885045299	0.259475265206579	3.52529511557507	0.000423011254068064	0.010647502785323	RNA guanine-7 methyltransferase
684	ENSSSCG00000026161	E2F6	562.513792351705	1.10296998675503	0.299150579645591	3.68700601570533	0.000226907994955305	0.00675745437567801	E2F transcription factor 6
685	ENSSSCG00000026176	CHRM3	132.930116425847	2.06909020596479	0.480512069203375	4.30601089665669	1.66224871932559e-05	0.000923698826800619	cholinergic receptor muscarinic 3
686	NA	NA	6.71851236181744	-3.90499981386702	1.34584402338817	-2.90152480228441	0.00371351381395231	0.0485985938260715	NA
687	ENSSSCG00000026276	ZBTB40	339.341348227315	1.65622190652397	0.42413152736578	3.90497239573423	9.42361412283981e-05	0.00350006110145989	zinc finger and BTB domain containing 40
688	ENSSSCG00000026427	RORC	39.1201811398746	-3.16431025675244	0.890530489084143	-3.55328682795211	0.000380449401044811	0.00988621033506373	RAR related orphan receptor C
689	ENSSSCG00000026454	PMAIP1	9830.08519638292	2.08958473043969	0.370290668226888	5.64309314205927	1.6702192866987e-08	3.01641603177785e-06	phorbol-12-myristate-13-acetate-induced protein 1
690	ENSSSCG00000026571	RAB8B	1179.15227494682	1.06609749030481	0.299053301969047	3.56490793876991	0.000363983925009779	0.0096492472450299	RAB8B, member RAS onco family
691	ENSSSCG00000026655	PTPN13	2675.81209667991	0.92438763546844	0.281438597529974	3.28450910280702	0.00102160197989436	0.020847606504963	protein tyrosine phosphatase non-receptor type 13
692	ENSSSCG00000026733	HIPK2	546.534419127981	1.26280363408941	0.354155865432929	3.56567194657562	0.00036292512018253	0.00963886422131837	homeodomain interacting protein kinase 2
693	ENSSSCG00000026784	LMNB2	1152.70649438239	0.983101999744851	0.29278242878572	3.3577903012218	0.000785681932096491	0.0173305840533284	lamin B2
694	NA	NA	132.514068184903	1.04340478805003	0.357260172252123	2.92057404964157	0.00349387155185052	0.0468269537858407	NA
695	ENSSSCG00000026940	CASP10	2682.64794011835	1.36226482048992	0.358912391849542	3.79553576701523	0.000147324952444628	0.00495011840213952	caspase 10
696	ENSSSCG00000026951	PSMB8	1569.73998050274	1.92156555935709	0.376932465702527	5.09790409211814	3.43434731317031e-07	3.70294402840931e-05	proteasome 20S subunit beta 8
697	ENSSSCG00000027032	SNORD31	13.4591383203102	-2.62273119742064	0.862710621234314	-3.04010537585384	0.00236495388014188	0.0368198854097952	Small nucleolar RNA SNORD31 [Source:RFAM
698	ENSSSCG00000027157	SLC40A1	728.060699409787	-2.13082406537337	0.643985622906028	-3.30880688882134	0.000936944377316746	0.0196553273291808	solute carrier family 40 member 1
699	ENSSSCG00000027340	PI4K2B	2157.43185024931	1.27510032722306	0.319784544368385	3.98737321636835	6.68088854856633e-05	0.00271509325118017	phosphatidylinositol 4-kinase type 2 beta
700	ENSSSCG00000027372	SAMD9	6157.58140889047	1.60826675796479	0.279673871989296	5.7505077128776	8.89758443430947e-09	1.73719324198518e-06	sterile alpha motif domain containing 9
701	ENSSSCG00000027434	OLFM2	310.877929003822	-1.14328460767608	0.380931788559139	-3.00128432967097	0.00268843406045363	0.0401202562634457	olfactomedin 2
702	ENSSSCG00000027447	TMTC1	276.792094552981	1.46977224707073	0.371672338967038	3.954483810002	7.67000650758334e-05	0.00300315051548954	transmembrane O-mannosyltransferase targeting cadherins 1
703	ENSSSCG00000027477	TBC1D2B	992.168585464612	1.53384645238444	0.39956209805418	3.83881869640312	0.000123627673456237	0.0043061569484693	TBC1 domain family member 2B
704	ENSSSCG00000027509	VPS54	1343.79938557904	1.35618714599803	0.297064663339644	4.56529272365005	4.98797830061286e-06	0.00034814642747466	VPS54 subunit of GARP complex
705	ENSSSCG00000027525	DHCR24	71.2802989504437	1.45166010642914	0.412819656293401	3.51645103206377	0.000437357326014845	0.0108569334143089	24-dehydrocholesterol reductase [Source:NCBI gene (formerly Entrezgene)
706	ENSSSCG00000027529	BIRC3	51282.5278033446	1.60543886022294	0.363675884888256	4.41447708504574	1.01254440067467e-05	0.000638051545094963	baculoviral IAP repeat containing 3
707	ENSSSCG00000027555	DEFB1	13.4885909546274	-3.77951237771445	0.98310458751755	-3.84446622028094	0.000120815124937234	0.0042470484795454	defensin, beta 1 [Source:NCBI gene (formerly Entrezgene)
708	NA	NA	242.209669017703	1.07777751191037	0.305849743030853	3.52387908268294	0.000425278275884389	0.0106673967534334	NA
709	ENSSSCG00000027607	IER3	7279.51732990867	1.66564011668579	0.400583545739907	4.15803428373283	3.2099785737631e-05	0.00153568776270626	immediate early response 3
710	ENSSSCG00000027660	IFI44L	1677.20849940119	1.47929182487868	0.30131080457425	4.9095213394983	9.12989650465867e-07	8.09256102449745e-05	interferon induced protein 44 like
711	ENSSSCG00000027709	PARP9	470.921791410661	1.57586949660996	0.42472869068501	3.71029678750539	0.000207016412922691	0.00636377262533412	poly(ADP-ribose) polymerase family member 9
712	ENSSSCG00000027762	TNFRSF11B	55.5460980091773	-2.36127415119392	0.659721697252459	-3.57919735098589	0.00034465113185979	0.00927284832981425	TNF receptor superfamily member 11b
713	ENSSSCG00000027777	PRRG1	1274.23121104082	1.09683277899972	0.302871434981344	3.62144676690055	0.000292960092086461	0.0082028825784209	proline rich and Gla domain 1
714	ENSSSCG00000027806	SAMHD1	2045.90058366345	2.09765170818139	0.366575210125442	5.72229558966513	1.0509425262954e-08	1.9978970552521e-06	SAM and HD domain containing deoxynucleoside triphosphate triphosphohydrolase 1
715	ENSSSCG00000027855	SOCS1	452.371044399805	1.93589228307915	0.421094452023475	4.59728755336637	4.28026701474462e-06	0.000304636935118376	suppressor of cytokine signaling 1
716	ENSSSCG00000027857	DMXL1	2299.35481949036	0.973591106892972	0.320935186138199	3.03360662508888	0.00241649300268689	0.0374063872417062	Dmx like 1
717	ENSSSCG00000027928	TMEM9	50.3223553385057	-2.33687410339426	0.717175891258081	-3.25843929206109	0.00112026842454569	0.0221795150439965	transmembrane protein 9
718	ENSSSCG00000027935	FHOD3	302.668138782196	1.98187602149729	0.374124381926514	5.29737198974264	1.17481209043813e-07	1.473293509316e-05	formin homology 2 domain containing 3
719	ENSSSCG00000028004		869.264938997631	1.26482096682294	0.397246070172499	3.18397351614757	0.00145268302599157	0.0264670420674984	Ras and Rab interactor 2
720	ENSSSCG00000028019	LRRC59	933.574352150918	1.00580769195932	0.280149864919836	3.59024871294203	0.000330362585023949	0.00895511937790998	leucine rich repeat containing 59
721	ENSSSCG00000028109	SNTB2	817.778531677385	1.0470702004548	0.312464908337412	3.35100093647679	0.00080520030090753	0.0176293966930501	syntrophin beta 2
722	ENSSSCG00000028363	TMPRSS9	18.6025630761418	-2.1932672455518	0.667093025978788	-3.28779819326359	0.00100974191917151	0.0206674878650353	transmembrane serine protease 9
723	ENSSSCG00000028454	HAPSTR1	2875.49146682588	1.37713313271553	0.341367832065467	4.03416198996579	5.47975069225814e-05	0.00234953769943661	HUWE1 associated protein modifying stress responses
724	ENSSSCG00000028504	RFC2	612.286777529749	1.0765247769076	0.35231495089911	3.05557505907798	0.00224629370091265	0.0357662149659802	replication factor C subunit 2
725	ENSSSCG00000028814	SOD3	490.556541211374	-1.31754628786036	0.380652981236021	-3.46127930899727	0.000537614711758384	0.0128387724884052	superoxide dismutase 3
726	ENSSSCG00000028840	EZH2	621.397934338426	1.4718239063202	0.36283023087649	4.05650847440334	4.98117559799816e-05	0.00219414710487431	enhancer of zeste 2 polycomb repressive complex 2 subunit
727	ENSSSCG00000028964	PIM2	547.387278943672	1.46547663112797	0.332363372681019	4.40926032043379	1.0372428319003e-05	0.000643179589497662	Pim-2 proto-onco, serine/threonine kinase
728	ENSSSCG00000028978	CAD	777.774438010978	-1.200728791425	0.403181429504375	-2.97813516089033	0.00290008065151582	0.0419843339209425	carbamoyl-phosphate synthetase 2, aspartate transcarbamylase, and dihydroorotase
729	ENSSSCG00000028979	UVRAG	904.545649083482	0.935537008759218	0.296297102606179	3.15742881226442	0.00159167094501578	0.0282165175626846	UV radiation resistance associated
730	ENSSSCG00000029005	KPNA2	651.013981656098	0.984965757139518	0.326873154995277	3.01329657112329	0.00258426234881029	0.0390558811878777	karyopherin subunit alpha 2
731	ENSSSCG00000029030	SMCHD1	1853.07708687375	1.20939855052214	0.397352294042509	3.04364305593455	0.00233732283332434	0.03658682588935	structural maintenance of chromosomes flexible hinge domain containing 1
732	ENSSSCG00000029174	CCDC126	781.712990947902	1.12439544081178	0.358911313103308	3.13279464804203	0.00173150537902319	0.030104440091609	coiled-coil domain containing 126
733	ENSSSCG00000029305	FNDC4	178.979600148392	-2.59858511238041	0.60543990542111	-4.2920611758701	1.77022158186836e-05	0.00096513816659751	fibronectin type III domain containing 4
734	ENSSSCG00000029438	SESN2	1219.75133878382	-0.915590195942025	0.279270278099231	-3.2785092712827	0.00104356936141811	0.0210745029785244	sestrin 2
735	ENSSSCG00000029449		9.85669816266142	5.6025054020769	1.68492865716291	3.32506980533552	0.000883964000163031	0.0187991170368954	proteoglycan 4
736	ENSSSCG00000029576	ZNF239	390.748507376649	-0.929340109595887	0.297784116387859	-3.12085184686425	0.00180328732253104	0.0308197641527476	zinc finger protein 239
737	ENSSSCG00000029715	OLFM1	107.702954755093	-1.74284878531279	0.450853460183148	-3.86566576333872	0.000110786573155206	0.00396199111125352	olfactomedin 1
738	ENSSSCG00000029783	MKX	118.518017230965	1.20898670703615	0.392968628755302	3.07654763909659	0.00209412836718886	0.0340337082667543	mohawk homeobox
739	ENSSSCG00000029866	CCDC112	687.3262063783	-1.08659706820153	0.36572330030614	-2.97109062313493	0.00296744202472434	0.0424445138166637	coiled-coil domain containing 112
740	ENSSSCG00000029949	CD248	1313.17070003222	-2.0213975447533	0.326381134357692	-6.19336515491726	5.88930746391805e-10	1.6684061615429e-07	CD248 molecule
741	ENSSSCG00000030095	ZBTB16	285.966396251238	1.27092291613222	0.432476484991067	2.93870987265001	0.00329581433069737	0.0448896836292545	zinc finger and BTB domain containing 16
742	ENSSSCG00000030108	ZNFX1	16057.3082433671	2.19966660460857	0.38042944929055	5.78206184802636	7.37905670456048e-09	1.50158607419e-06	zinc finger NFX1-type containing 1
743	ENSSSCG00000030206	STK33	37.8111078556733	-1.89994654551017	0.63609146204821	-2.98690779371941	0.002818147062225	0.0413463151773137	serine/threonine kinase 33
744	ENSSSCG00000030277	ENDOV	2529.71200057763	2.07754218175656	0.41808708703339	4.96916132114514	6.72431093037055e-07	6.18807925617794e-05	endonuclease V
745	NA	NA	562.070186035843	-2.96848891345375	0.486489303291446	-6.10185854728936	1.04842141648798e-09	2.80510974544784e-07	NA
746	ENSSSCG00000030345	INPP5J	118.023074993393	-2.07313042236089	0.590754074118402	-3.50929517575426	0.000449295969437934	0.0110775224683264	inositol polyphosphate-5-phosphatase J
747	ENSSSCG00000030378	LIMK1	164.23748422433	1.13452643238427	0.380899571699343	2.97854478366226	0.00289620702607522	0.0419703100428633	LIM domain kinase 1
748	ENSSSCG00000030460	ARHGEF6	800.683021468537	0.916257228942816	0.304282606301168	3.01120474837769	0.00260213325776521	0.0392438635784883	Rac/Cdc42 guanine nucleotide exchange factor 6
749	ENSSSCG00000030548	HERC5	3710.70753063131	2.15225931733679	0.499032260571805	4.31286609581248	1.61151728085356e-05	0.000908387206645065	HECT and RLD domain containing E3 ubiquitin protein ligase 5
750	ENSSSCG00000030560	IGF1R	3813.11345402577	1.22396673813765	0.30521858990419	4.01013168471114	6.06848937428753e-05	0.00254474271510047	insulin like growth factor 1 receptor
751	ENSSSCG00000030575	TMEM158	86.1911875418934	1.68602450927067	0.48672631303189	3.46400937062181	0.000532187971628336	0.012751329708269	transmembrane protein 158
752	ENSSSCG00000030581	VGLL4	1964.93887786811	1.55207305743168	0.300607047540563	5.16312930827827	2.42855251568606e-07	2.69905590358709e-05	vestigial like family member 4
753	ENSSSCG00000030623	XKR8	132.363747655951	1.41370106698206	0.411213293184113	3.43787783715712	0.000586292136548896	0.0136624980465459	XK related 8
754	ENSSSCG00000030685	ARID2	958.387239620334	1.80554521140761	0.340910086838927	5.29625048102694	1.18204669665462e-07	1.473293509316e-05	AT-rich interaction domain 2
755	NA	NA	8343.23464049041	3.95236927011847	0.368956496243218	10.712290772387	8.91286210066176e-27	3.21932579075903e-23	NA
756	ENSSSCG00000030820	STK4	829.356464429972	1.89298684840046	0.29035138991926	6.51964107672037	7.04758270722801e-11	2.61085833215462e-08	serine/threonine kinase 4
757	ENSSSCG00000030857	LENG8	3470.5850588685	-1.14287129371139	0.361632633232893	-3.16031018410713	0.00157601257978102	0.0280421548678277	leukocyte receptor cluster member 8
758	NA	NA	63.7739596929943	-2.14308963076394	0.727368221309507	-2.94636137238118	0.00321536509803115	0.0443341371113469	NA
759	ENSSSCG00000031106	PLA2G2D	340.892507733069	2.43777238307168	0.665702992773957	3.66195196586632	0.000250300798376988	0.00727634996971977	phospholipase A2 group IID
760	ENSSSCG00000031130	ZBED1	1421.24201733938	1.35502569716684	0.371252331806029	3.64987794305574	0.000262364948192345	0.00754287664656536	zinc finger BED-type containing 1
761	ENSSSCG00000031147	ACAP2	1789.91433164516	1.21927476666992	0.384849148300973	3.16818881385799	0.00153391863970763	0.0274622757205649	ArfGAP with coiled-coil, ankyrin repeat and PH domains 2
762	ENSSSCG00000031155		324.319944246277	-2.30628374875114	0.410054810939002	-5.62433042419351	1.86228888714566e-08	3.20313688589053e-06	RASD family member 2
763	ENSSSCG00000031261	RHOQ	1252.31696446016	1.46679426222167	0.418994242783531	3.50075039808952	0.000463950157753161	0.0113999181619348	ras homolog family member Q
764	ENSSSCG00000031348	ALPK1	80.9084047780591	1.47169106517198	0.425864391079665	3.45577394118561	0.000548715300459122	0.0129964568213662	alpha kinase 1
765	ENSSSCG00000031361	CELSR1	69.2461134264394	-2.31604044213021	0.589884839819881	-3.92625862844247	8.6277386253861e-05	0.0032631823994654	cadherin EGF LAG seven-pass G-type receptor 1
766	ENSSSCG00000031380	MARCKSL1	10106.0540544343	1.12172202649812	0.381925103463733	2.9370209402971	0.00331381726651365	0.0449246094235369	MARCKS like 1
767	ENSSSCG00000031456	ARL5B	6922.81910196512	1.38812968593698	0.388638703415423	3.57177417930293	0.00035457108472856	0.00948674635584857	ADP ribosylation factor like GTPase 5B
768	ENSSSCG00000031518	STARD4	320.706842851344	1.46610383365359	0.499603736218122	2.93453336588641	0.00334049636012448	0.0451060667393257	StAR related lipid transfer domain containing 4
769	ENSSSCG00000031576	TMEM42	108.966808822556	-1.71029609722375	0.421789124270546	-4.05486058983049	5.01642116408378e-05	0.00220295601758913	transmembrane protein 42
770	NA	NA	539.098285542688	3.77525628775009	0.443184324226405	8.51847883911495	1.61662567825366e-17	1.94641731661741e-14	NA
771	ENSSSCG00000031648	CCN5	36.0898441043182	-2.55078439362619	0.713112097745463	-3.5769753474813	0.000347592940751831	0.00933461488472575	cellular communication network factor 5
772	ENSSSCG00000031741		40.8479965974378	-1.83149461096203	0.54655875812464	-3.3509564776645	0.00080532958315428	0.0176293966930501	ribonucleotide reductase regulatory subunit M2
773	ENSSSCG00000031776		156.245188300115	1.68135947313141	0.405881301434796	4.14249059315563	3.43554463923408e-05	0.00161158275804072	TUB like protein 4
774	ENSSSCG00000031970	RASSF5	829.721949723668	2.13034626642857	0.465818668201996	4.57333810740444	4.80014598728304e-06	0.000338304923045197	Ras association domain family member 5
775	NA	NA	36.1396188559947	-2.66002093786983	0.613322355841766	-4.33706828478318	1.44395775542884e-05	0.000827869113112535	NA
776	NA	NA	1070.16988320285	1.21975348963537	0.343179912784314	3.5542683129067	0.000379032307054941	0.00986713292311674	NA
777	ENSSSCG00000032097	DUSP16	1261.50959763425	1.01300757191189	0.314889756733931	3.21702294294648	0.0012952824024042	0.0244248092707192	dual specificity phosphatase 16
778	ENSSSCG00000032171	TCF20	1614.99458322963	1.4227618055404	0.324908235463329	4.37896504381151	1.19244255180478e-05	0.000706082376576863	transcription factor 20
779	ENSSSCG00000032176	SMURF2	1151.09573316307	0.955427959171311	0.295202274790536	3.23651963674482	0.00120996901266805	0.0233202714150398	SMAD specific E3 ubiquitin protein ligase 2
780	ENSSSCG00000032282	ACP5	71.8480251680085	-2.5650971503525	0.564022018339876	-4.54786704586911	5.41923519622494e-06	0.000372843381500276	acid phosphatase 5, tartrate resistant
781	ENSSSCG00000032343	CCL4	220.311006514308	1.18232642791852	0.390294638223765	3.02931762859798	0.0024510683761051	0.0377537696140368	C-C motif chemokine ligand 4 [Source:NCBI gene (formerly Entrezgene)
782	ENSSSCG00000032360	PANX1	2467.46318146209	2.05631200604417	0.438386927922242	4.69063257837129	2.72361679456031e-06	0.000203890235480867	pannexin 1
783	NA	NA	757.671463089841	-1.93211207701191	0.664424822359689	-2.90794686169319	0.00363810151129847	0.048042462711874	NA
784	ENSSSCG00000032408	CASP7	3088.1311441494	1.31387771365672	0.283983836683579	4.62659329136634	3.71729466100153e-06	0.000269293468428863	caspase 7
785	NA	NA	104.857264546858	2.5806248227297	0.443565930564874	5.8179058509821	5.95894471651223e-09	1.23744876572363e-06	NA
786	ENSSSCG00000032424	NUDT16	47.2426042213492	-1.3634370397776	0.463565917746366	-2.9411934475381	0.00326950280669431	0.0448176248113088	nudix hydrolase 16
787	ENSSSCG00000032469	SENP3	1649.44780410897	1.17870414785395	0.294977509358141	3.99591192704406	6.44456914643642e-05	0.00266609785906296	SUMO specific peptidase 3
788	ENSSSCG00000032474	CXCL10	34738.7859741483	4.25240465676955	0.559480270841026	7.60063379961052	2.94683905455417e-14	2.36532948112215e-11	C-X-C motif chemokine ligand 10
789	ENSSSCG00000032475	CEP44	176.819229660359	1.19538796848952	0.332201085687576	3.59838670007763	0.000320197286673865	0.00874519923981852	centrosomal protein 44
790	NA	NA	40.2901600685402	-4.55827693480967	0.741292689141082	-6.14909198698726	7.7927776584793e-10	2.1243405964096e-07	NA
791	ENSSSCG00000032531	SMG1	1349.32225462642	1.44067278967322	0.451219598313483	3.19284178935933	0.00140880110634457	0.0259564438083947	SMG1 nonsense mediated mRNA decay associated PI3K related kinase
792	ENSSSCG00000032561	PDCD1LG2	72.7620018287664	2.81708173928211	0.509113434004929	5.53330859317854	3.14245878081367e-08	4.88196177045117e-06	programmed cell death 1 ligand 2
793	NA	NA	70.5983487527881	1.93620767509069	0.518808075065316	3.7320307222414	0.000189942328766499	0.00594929963322448	NA
794	ENSSSCG00000032777	CXCL9	2210.30494938019	6.28255164622747	0.445642422688703	14.097741432072	3.92119604598211e-45	5.66534404723495e-41	C-X-C motif chemokine ligand 9
795	ENSSSCG00000032911	DUSP8	152.966160844106	1.38956542690137	0.443837143574922	3.13080022034434	0.00174330709499982	0.030166558944169	dual specificity phosphatase 8
796	NA	NA	10573.7225428313	3.33871794032956	0.34270750322781	9.74217928957976	1.99235032212672e-22	4.79757957568115e-19	NA
797	ENSSSCG00000033113	CHMP7	1377.53629304016	1.67626216146026	0.332129018625548	5.0470210895668	4.48751832602594e-07	4.38078816043397e-05	charged multivesicular body protein 7
798	ENSSSCG00000033190	AQP1	4867.88800959839	-2.21009208792465	0.421564263708148	-5.24259828972294	1.58330999537841e-07	1.89055064572126e-05	aquaporin 1 (Colton blood group) [Source:NCBI gene (formerly Entrezgene)
799	ENSSSCG00000033222	TRIM14	33.0617801192498	1.66211427306118	0.53920405208374	3.08253297919032	0.00205246986452161	0.0335453445730862	tripartite motif containing 14
800	NA	NA	73.9949085653429	-1.27876517825584	0.395122106712865	-3.23637973307607	0.00121056226199334	0.0233202714150398	NA
801	ENSSSCG00000033258	TCF21	1263.33408041047	1.47062689006841	0.334390043202625	4.39793863472569	1.09283865828903e-05	0.00066064154539581	transcription factor 21
802	ENSSSCG00000033353	LY6H	20.4748709255894	5.81846233015936	1.28040124233435	4.54424920703097	5.51314028025522e-06	0.000377506401749419	lymphocyte antigen 6 family member H
803	ENSSSCG00000033382		25.5243099813813	-3.5847752919701	0.833853514230983	-4.29904681192852	1.71534242673151e-05	0.000945926235931939	mucin 5AC, oligomeric mucus/gel-forming
804	ENSSSCG00000033453	BST2	772.38152779063	2.32213966003985	0.589490627047143	3.93923084353662	8.17432502546355e-05	0.00313269623257022	bone marrow stromal cell antigen 2
805	ENSSSCG00000033528	BPTF	1678.21233052552	1.0263768388431	0.275960567606847	3.71928804083833	0.000199785119234814	0.00622089526444954	bromodomain PHD finger transcription factor
806	ENSSSCG00000033606	H2AC8	52.5463317665325	-3.34217467815971	0.842089304207767	-3.96890764608869	7.22028564066176e-05	0.00288173168332268	H2A clustered histone 8
807	NA	NA	32.6113703595018	-2.34640883174983	0.780655742880425	-3.00568957975275	0.00264979357787118	0.0396727643658889	NA
808	ENSSSCG00000033860	ZMAT3	308.187405662609	1.67715918191305	0.376030031229733	4.46017350377104	8.18933282935296e-06	0.000535382265694532	zinc finger matrin-type 3
809	ENSSSCG00000033879	ZNF280B	342.106275119251	1.53980716193414	0.425534192096643	3.61852746625924	0.0002962840590681	0.00826392294481836	zinc finger protein 280B
810	ENSSSCG00000033883		172.250479377349	-1.52582451142943	0.43254836906133	-3.52752344146068	0.000419466617369126	0.0106137542692629	threonine aldolase 1
811	ENSSSCG00000033892	EVA1B	257.929465039372	-1.05996514589226	0.332013361469516	-3.19253761716328	0.00141028574125068	0.0259564438083947	eva-1 homolog B
812	NA	NA	1121.51626338736	1.73446875899411	0.451035868747076	3.84552289336159	0.000120295631776781	0.0042470484795454	NA
813	NA	NA	708.250358165458	1.55727001430986	0.43135153710593	3.6102108845098	0.000305948156733194	0.00844878247972658	NA
814	ENSSSCG00000033993	PLCXD3	43.4514853516329	-3.60127099569005	0.966905338048858	-3.72453316159899	0.000195676990360637	0.00610613640762523	phosphatidylinositol specific phospholipase C X domain containing 3
815	ENSSSCG00000034027	ZNF544	55.0487595931093	-2.23908574226804	0.565639625124812	-3.95850227390624	7.54212231708576e-05	0.00297444282446291	zinc finger protein 544
816	ENSSSCG00000034114	GPR68	46.3492728531678	-2.58899637407396	0.616983864937681	-4.19621406847562	2.71413730308085e-05	0.00136159221371223	G protein-coupled receptor 68
817	ENSSSCG00000034139	EYA4	198.195076742658	1.57201664386004	0.368785699935726	4.26268329854986	2.0198669226462e-05	0.00106507435395593	EYA transcriptional coactivator and phosphatase 4
818	NA	NA	1340.1955689926	1.15467336647272	0.332241424895812	3.47540457013997	0.000510083441028944	0.012323888889609	NA
819	ENSSSCG00000034217	SKA2	180.418254289604	1.13898268496435	0.364984843021002	3.12063009394286	0.00180464565844577	0.0308197641527476	spindle and kinetochore associated complex subunit 2
820	ENSSSCG00000034259	PMEPA1	1225.56602597131	1.26135213883661	0.286309249596083	4.4055584673429	1.05511687188313e-05	0.000651467032690917	prostate transmembrane protein, androgen induced 1
821	ENSSSCG00000034260	GDF15	67.8641599170863	-5.1197786343543	0.648821133303574	-7.8908937634108	3.00029981772897e-15	2.70927073540926e-12	growth differentiation factor 15
822	ENSSSCG00000034265	DESI1	1053.00538401856	1.77511687339495	0.551095133450997	3.22107158210424	0.00127712245466111	0.0242623093786912	desumoylating isopeptidase 1
823	ENSSSCG00000034302	SLC12A7	600.955683596608	2.09509054917155	0.292304864997012	7.16748436326218	7.63883893779459e-13	4.59858104055234e-10	solute carrier family 12 member 7
824	ENSSSCG00000034347	TRIM56	2137.48022133851	1.7434760167757	0.27662843175729	6.30259155105718	2.92709533961999e-10	9.19362466670208e-08	tripartite motif containing 56
825	ENSSSCG00000034373	TNRC6C	485.369548113986	1.02111570126331	0.3062883231702	3.33383816494988	0.000856564793518907	0.0183168231625866	trinucleotide repeat containing adaptor 6C
826	ENSSSCG00000034386	ATP2A2	9714.03799987193	0.984133880198642	0.260849427973116	3.77280444065252	0.000161422811961628	0.0053369262865483	ATPase sarcoplasmic/endoplasmic reticulum Ca2+ transporting 2
827	ENSSSCG00000034407	AMN1	399.998792383055	-1.12663112983643	0.320225797851583	-3.51823974643853	0.000434419695573354	0.0108073975033323	antagonist of mitotic exit network 1 homolog
828	ENSSSCG00000034441	MRGPRF	2670.10405258831	-1.50443372057786	0.311862263661931	-4.82403258064181	1.40684421474485e-06	0.000116816581693297	MAS related GPR family member F
829	ENSSSCG00000034450	ABHD10	172.080127743949	-1.7021389565462	0.473098540876643	-3.59785289845148	0.000320854990887274	0.00874662812894214	abhydrolase domain containing 10, depalmitoylase
830	NA	NA	28.8936754590163	2.40228066942126	0.728014330973153	3.29977112704647	0.000967637081486153	0.0202029198747282	NA
831	ENSSSCG00000034570	IFI6	1768.12638935364	2.33255637306096	0.631557058384217	3.69334225957129	0.00022132581935658	0.00666190716263306	interferon alpha inducible protein 6
832	ENSSSCG00000034686	TAFA2	86.9120019999624	-1.2872591304476	0.428024124304551	-3.00744527551835	0.00263453554154562	0.0395262403990146	TAFA chemokine like family member 2
833	NA	NA	332.775857604489	2.34026621009926	0.635376602881576	3.68327413928311	0.000230257302765054	0.00678930104152958	NA
834	ENSSSCG00000034896	HPRT1	865.247124145648	-0.946035752406443	0.32105435879246	-2.9466528844668	0.00321233577851955	0.0443341371113469	hypoxanthine phosphoribosyltransferase 1
835	ENSSSCG00000034948	RASSF9	214.514055546849	-1.62705554472749	0.442560865436195	-3.67645599012428	0.000236496632871611	0.0069260781701222	Ras association domain family member 9
836	ENSSSCG00000034980	IRF8	954.294557135326	1.80349853016256	0.512956915338717	3.51588696093836	0.000438287547043786	0.0108569334143089	interferon regulatory factor 8
837	ENSSSCG00000035027	ZDHHC14	529.712984259462	-1.10830650532046	0.283328137345241	-3.91174175535544	9.1632866510785e-05	0.0034298229413156	zinc finger DHHC-type palmitoyltransferase 14
838	ENSSSCG00000035045	DOCK1	825.275266828684	0.924619462325742	0.306564644076289	3.01606685634515	0.00256076790691102	0.0389265848648792	dedicator of cytokinesis 1
839	ENSSSCG00000035048	C1QBP	2850.8503004284	-0.976647323679363	0.320465727986438	-3.04758742788463	0.00230686409486303	0.0362401758357259	complement C1q binding protein
840	ENSSSCG00000035077	INHBA	1813.05225290757	1.29753226906386	0.413442523589741	3.13836191255305	0.00169894964289411	0.0296454401455725	inhibin subunit beta A
841	ENSSSCG00000035148	ZNF268	112.115790901328	-1.07790899746488	0.367255081019539	-2.93504175482744	0.00333502806711472	0.0450743550174682	zinc finger protein 268
842	ENSSSCG00000035153	TRIM38	546.477411882621	1.42894574324308	0.427130884098324	3.34545170213948	0.000821486649474973	0.0178399687346033	tripartite motif containing 38
843	ENSSSCG00000035223		1112.0217288039	2.17639461690772	0.460663075726207	4.72448245059964	2.30702136041731e-06	0.000177297045826113	synemin
844	ENSSSCG00000035297	ISG12(A)	5884.71768662725	2.08955701623381	0.565354849471528	3.69600971529129	0.000219014594892609	0.00662558405482056	putative ISG12(a) protein [Source:NCBI gene (formerly Entrezgene)
845	ENSSSCG00000035313		355.042356190277	1.07999469896462	0.291983396292691	3.69882230523138	0.000216602172772131	0.00660225357006698	zinc finger BED-type containing 4
846	NA	NA	15.1210834883416	-2.51648802014858	0.820310094240663	-3.06772772615704	0.00215693045415121	0.0347417293217131	NA
847	ENSSSCG00000035355	F2R	126.95557406456	1.3603661050149	0.426601621918048	3.1888441935559	0.00142842844989583	0.026223550500756	coagulation factor II thrombin receptor
848	ENSSSCG00000035420	HES4	5097.06088494581	1.72716336435654	0.445634838334123	3.87573684950898	0.000106302520368407	0.00383964703570685	hes family bHLH transcription factor 4
849	NA	NA	51.2493591694757	-4.32527603041052	0.621490147105484	-6.95952470132467	3.41422652541047e-12	1.64429149463768e-09	NA
850	ENSSSCG00000035445	SEZ6	15.3489120155199	-3.23693514251223	0.931364864902568	-3.4754748267757	0.000509949850663661	0.012323888889609	seizure related 6 homolog
851	NA	NA	1089.50937824792	1.22498593735269	0.384363445435145	3.18705108901775	0.00143731384179423	0.0262864688433456	NA
852	ENSSSCG00000035598	EDN1	314.58234536977	2.54467765446594	0.451435123670954	5.63686235526664	1.73176420834053e-08	3.04482450524403e-06	endothelin 1 [Source:NCBI gene (formerly Entrezgene)
853	ENSSSCG00000035615	GSTK1	138.240014968307	-1.24521989174662	0.419558900685365	-2.96792629047436	0.00299816218526405	0.0427193759888511	glutathione S-transferase kappa 1
854	ENSSSCG00000035634	PLSCR1	1335.24610768193	1.89091219072109	0.407730453211172	4.63765258598859	3.52388448272952e-06	0.000258442045718153	phospholipid scramblase 1 [Source:NCBI gene (formerly Entrezgene)
855	ENSSSCG00000035736		71.9951968021163	-1.43098451449982	0.495139622191773	-2.89006262145909	0.00385165092325023	0.049775181162003	C-C motif chemokine ligand 24
856	ENSSSCG00000035746	ECT2	419.365273409097	2.05784979750294	0.327469131601144	6.28410313803071	3.29751744181041e-10	1.01367089360163e-07	epithelial cell transforming 2
857	ENSSSCG00000035805	DLK1	19.0629260656849	-2.36260632990719	0.797791692319134	-2.96143260534492	0.00306211500908757	0.0432467621224802	delta like non-canonical Notch ligand 1
858	ENSSSCG00000035859	WNT5A	856.254953696783	2.29575409922362	0.362931598671943	6.3255834091723	2.52277587668779e-10	8.28387860599662e-08	Wnt family member 5A
859	ENSSSCG00000035940	SPSB1	2416.3806932422	1.23827262340524	0.350244147879515	3.53545556978501	0.000407072693721742	0.010354553307908	splA/ryanodine receptor domain and SOCS box containing 1
860	ENSSSCG00000036030	INKA2	233.959340385202	-1.59713837274603	0.340244138202777	-4.69409519053692	2.67789324107303e-06	0.000201511466390745	inka box actin regulator 2
861	ENSSSCG00000036056	DNAH17	197.395004517503	-2.57973117137572	0.485970040294412	-5.30841606987306	1.10581984391283e-07	1.43935901845518e-05	dynein axonemal heavy chain 17
862	ENSSSCG00000036064	CALHM6	19.5517981940732	2.37817348856476	0.763329966145795	3.11552486347762	0.00183617868354874	0.0310946810373197	calcium homeostasis modulator family member 6
863	ENSSSCG00000036291	ZNF576	114.355267079006	-1.04337961341976	0.343818444179184	-3.0346819115847	0.0024078949500938	0.0373898687063882	zinc finger protein 576
864	ENSSSCG00000036340	ZBTB5	427.631447117545	1.29825521772918	0.337680380091239	3.84462732889129	0.000120735782532311	0.0042470484795454	zinc finger and BTB domain containing 5
865	ENSSSCG00000036352	RAB7B	210.077151520233	-1.58144140050296	0.472064281507151	-3.35005519895283	0.000807954577791016	0.0176601024809752	RAB7B, member RAS onco family
866	ENSSSCG00000036383	LGALS3BP	1099.09867817422	2.40719188468573	0.475224146441678	5.06538209960497	4.07581975891882e-07	4.13603763825639e-05	galectin 3 binding protein
867	NA	NA	42.3213646257732	-2.22575848443478	0.504530435443015	-4.41154453344405	1.02635838490248e-05	0.00063917353211513	NA
868	ENSSSCG00000036509	RWDD3	68.2639390682905	-1.50742249028019	0.513521026963834	-2.93546400464408	0.00333049249563332	0.0450674193091819	RWD domain containing 3
869	ENSSSCG00000036555	PRDM8	414.584781618793	-1.9351913773944	0.469738019130915	-4.11972482230584	3.79325145787104e-05	0.00175095517774188	PR/SET domain 8
870	ENSSSCG00000036569	PTP4A3	205.97905663197	-1.47704505194013	0.305134643657271	-4.8406337419987	1.29425717383828e-06	0.000108089177153847	protein tyrosine phosphatase 4A3
871	ENSSSCG00000036746	RASL10B	195.670517420487	1.65688641937151	0.473801244288296	3.49700731972612	0.000470508922072543	0.0115023907040679	RAS like family 10 member B
872	ENSSSCG00000036776	LRRC75A	195.704038137635	1.44464064028441	0.317643672176266	4.5479912456205	5.41603879567228e-06	0.000372843381500276	leucine rich repeat containing 75A
873	ENSSSCG00000036828	SNX4	900.483115830426	-1.07770852419055	0.346833413798694	-3.10727998316812	0.00188817476885105	0.031647736728956	sorting nexin 4
874	ENSSSCG00000036868	CTNNBIP1	374.659828611259	-0.936089737650439	0.317252433052192	-2.95061484208205	0.00317142120258301	0.0440160360565987	catenin beta interacting protein 1
875	ENSSSCG00000036871	EXOC3L4	68.392344417629	-1.73451418597978	0.413106916524434	-4.19870526635733	2.68445448829291e-05	0.00135139367410648	exocyst complex component 3 like 4
876	NA	NA	145.434133017531	-1.14569773342137	0.374605961375591	-3.05840763775956	0.00222516660980348	0.0356026657568557	NA
877	ENSSSCG00000037000	SIGMAR1	610.24399329115	-0.949519384036199	0.309206029786189	-3.07083074897594	0.00213464115900799	0.0345429346319732	sigma non-opioid intracellular receptor 1
878	ENSSSCG00000037066	GADD45A	2197.90789973113	-1.23464722102528	0.35613237801014	-3.46682103975991	0.000526652401379643	0.0127029614276011	growth arrest and DNA damage inducible alpha
879	ENSSSCG00000037116	ZNRF2	409.782942806716	1.19339067426809	0.383278387161744	3.11363936564594	0.00184795212451007	0.0312271488829491	zinc and ring finger 2
880	ENSSSCG00000037153	FEM1A	525.032152276891	0.93758728466731	0.298515991927846	3.14082766089775	0.00168471136723622	0.0294325390977375	fem-1 homolog A
881	ENSSSCG00000037190	TAGLN3	45.6325615215917	-1.89702305154016	0.507905430682187	-3.73499265206162	0.000187720668199845	0.00593056268824163	transgelin 3
882	ENSSSCG00000037204	ZNF248	202.502679150005	-1.06550164034506	0.367336602062683	-2.9006138630401	0.00372432502300486	0.0486410829701957	zinc finger protein 248
883	ENSSSCG00000037310	ATP6AP1	997.168440791309	1.06836545374871	0.290320170862176	3.67995599677398	0.000233274203543757	0.00685029612357763	ATPase H+ transporting accessory protein 1
884	ENSSSCG00000037536	SLC25A28	2452.64124405842	1.28784278234226	0.394764705808869	3.26230476887108	0.00110510263696654	0.0219924557835985	solute carrier family 25 member 28
885	ENSSSCG00000037539	SORCS2	91.8351068239773	-1.69491858871168	0.550258494325382	-3.08022248850453	0.00206846014978205	0.0337684884113572	sortilin related VPS10 domain containing receptor 2
886	ENSSSCG00000037549	GCLM	1541.80887680501	1.43308347073865	0.326154932232411	4.39387336849305	1.11348692083009e-05	0.00066753771917648	glutamate-cysteine ligase modifier subunit
887	ENSSSCG00000037572	EPSTI1	1059.68444598282	2.39686766980421	0.459645137239642	5.21460464957463	1.84209685615049e-07	2.1719589029422e-05	epithelial stromal interaction 1
888	ENSSSCG00000037583	GNB4	1444.76150502913	1.83551543187532	0.360417984550184	5.09274095788011	3.52923747331246e-07	3.74929580988371e-05	G protein subunit beta 4
889	NA	NA	38.4933260126766	2.28796937497495	0.634824071878971	3.60409990157265	0.000313236565421547	0.00858755578218313	NA
890	ENSSSCG00000037815	ZC3H12A	2540.17557957496	1.49332895761668	0.388704893861518	3.84180642230015	0.0001221321425105	0.00428292523056238	zinc finger CCCH-type containing 12A
891	ENSSSCG00000037832	PMP22	2630.62466289421	-1.07778593060319	0.336044389869766	-3.20727250057912	0.00133999999518033	0.0251432726368383	peripheral myelin protein 22
892	NA	NA	21.9865395274622	-2.83472613456858	0.767359141837943	-3.69413222572546	0.000220638975524341	0.00665509795067993	NA
893	ENSSSCG00000037865	SOX18	142.231167073338	-1.20204516272241	0.412571561192234	-2.91354343292297	0.00357352122801521	0.0475416525804454	SRY-box transcription factor 18
894	ENSSSCG00000037890	ZNF853	316.576933640703	1.01869743737364	0.3098204533454	3.28802513318238	0.00100892832010095	0.0206674878650353	zinc finger protein 853
895	ENSSSCG00000038026	RAB12	47.5186872452527	1.39921142646725	0.449449956181067	3.113164006859	0.00185093129099708	0.0312409524443058	RAB12, member RAS onco family
896	ENSSSCG00000038031	CPSF6	100.12391200022	-1.8606473298889	0.575525252353409	-3.23295515232466	0.00122516794754072	0.023476427726881	cleavage and polyadenylation specific factor 6
897	NA	NA	642.80960028228	2.03534921971365	0.588839304209503	3.45654443438696	0.000547148991948817	0.0129964568213662	NA
898	ENSSSCG00000038082	TRAF6	1131.89639377638	0.969516258479192	0.303782658642485	3.1914799311181	0.00141545944018185	0.0260185216179991	TNF receptor associated factor 6
899	ENSSSCG00000038178	FUT10	126.047279632917	1.2699078089372	0.38194893915528	3.3248104098567	0.000884786792987879	0.0187991170368954	fucosyltransferase 10
900	NA	NA	139.00896834479	-1.72522957552832	0.477976737911642	-3.60944254958124	0.000306855722017058	0.00844878247972658	NA
901	NA	NA	13.3023533432359	-5.50756259406479	1.4715537158455	-3.74268539079482	0.000182064118135437	0.00579396999740262	NA
902	ENSSSCG00000038320	POR	1225.45502746362	1.59688583546822	0.412347887020381	3.87266646861536	0.000107651099853506	0.00386901266339167	cytochrome p450 oxidoreductase
903	ENSSSCG00000038348	NME1	989.329184850474	-1.06093240607443	0.279079646735112	-3.80153987754406	0.000143799588680921	0.00485424405902322	NME/NM23 nucleoside diphosphate kinase 1
904	ENSSSCG00000038362		486.778583524085	1.38906781128762	0.372189937247192	3.73214768126592	0.000189854134435685	0.00594929963322448	CKLF like MARVEL transmembrane domain containing 6
905	NA	NA	71.7230186295181	-1.67524793263225	0.466998194853731	-3.58726853999287	0.000334160132351701	0.00902419736863062	NA
906	ENSSSCG00000038494	LPIN2	1151.81847809937	1.106777704578	0.312410735886967	3.54270060993819	0.000396052059129062	0.0101751641162317	lipin 2
907	ENSSSCG00000038562	RND1	8182.07034725918	1.52518960147642	0.483240112107004	3.15617342862194	0.00159853781966321	0.0282688793372021	Rho family GTPase 1
908	ENSSSCG00000038693	RAB19	19.5588425502826	-3.82300369531607	0.970134692709584	-3.94069372433061	8.12463065550803e-05	0.00313025769895413	RAB19, member RAS onco family
909	ENSSSCG00000038730	ITPRID2	3015.53768988241	0.979090875890565	0.287998988280388	3.39963303946523	0.000674763447342487	0.0153045247836801	ITPR interacting domain containing 2
910	ENSSSCG00000038735	SNAP23	1268.4183631043	0.910360810311867	0.309149857417128	2.94472337111106	0.00323243525297021	0.0444420968883025	synaptosome associated protein 23
911	ENSSSCG00000038774	MAPK13	23.9684924028674	-2.49303954859584	0.621635648286549	-4.01045138815245	6.06027772645129e-05	0.00254474271510047	mitogen-activated protein kinase 13
912	NA	NA	89.6615631890627	-1.94701541832906	0.405886429862178	-4.79694632557729	1.61102747721542e-06	0.000127890796652793	NA
913	NA	NA	377.74712453449	2.04616697561837	0.36518658614654	5.60307265721227	2.10584897728448e-08	3.53782628183793e-06	NA
914	ENSSSCG00000038869	APLNR	229.186280139757	-1.77417947829477	0.571835799716357	-3.10260301851477	0.00191826769886484	0.0320662356260594	apelin receptor
915	ENSSSCG00000038904	FRAT2	143.967600149931	-1.14776888823535	0.383462391526616	-2.99317198660845	0.00276094114232047	0.0407890345248521	FRAT regulator of WNT signaling pathway 2
916	NA	NA	6777.08805178599	1.87751150153952	0.353265015370719	5.31473941615546	1.06810064882919e-07	1.40290165220765e-05	NA
917	ENSSSCG00000038956	HEYL	201.838924956427	-1.51418102826186	0.372680691313893	-4.06294466966771	4.84575188452152e-05	0.00214758966955727	hes related family bHLH transcription factor with YRPW motif like
918	ENSSSCG00000039053	VGF	2002.50335296282	-4.64794142113445	1.1906049208107	-3.90384865700841	9.46749968372257e-05	0.00350734449821599	VGF nerve growth factor inducible
919	ENSSSCG00000039056	GAS7	566.624718319463	-1.24962137723363	0.332947189423433	-3.753211971537	0.000174583106235698	0.00560528159754081	growth arrest specific 7
920	ENSSSCG00000039060	RASSF3	7917.5537162055	1.52077933428468	0.451921400243161	3.36514122470503	0.000765044902261074	0.0170051826890277	Ras association domain family member 3
921	ENSSSCG00000039258	KICS2	204.358922609517	-0.93825604193585	0.311032890504523	-3.01658143103102	0.00255642543490071	0.0389265848648792	KICSTOR subunit 2
922	ENSSSCG00000039300	IL27	149.116521601657	4.54053079393734	0.601618642941395	7.54719097755692	4.44746194790329e-14	3.24397736625088e-11	interleukin 27
923	ENSSSCG00000039321	FAM222B	351.130961169073	0.964650176936059	0.292572786671634	3.29712885436172	0.000976786771880543	0.0203059212663742	family with sequence similarity 222 member B
924	ENSSSCG00000039348	H1-0	7237.0379906728	-2.0016078140988	0.614544961963947	-3.25705674602248	0.0011257392546952	0.0222499052692698	H1.0 linker histone
925	ENSSSCG00000039442	BMP2	602.684662339339	1.23206360224621	0.391297074105314	3.14866551216433	0.00164017812810945	0.02879379537658	bone morphotic protein 2
926	NA	NA	65.1686555074645	1.63602312599823	0.475202664622619	3.44279030358021	0.00057574555581591	0.0135145561470826	NA
927	ENSSSCG00000039522	SHISAL1	486.257564424584	-1.59172936414949	0.465342823419479	-3.42055208341451	0.000624941678520478	0.0144005699701178	shisa like 1
928	ENSSSCG00000039582	PSMA2	3580.31390613501	1.40678355133195	0.386425356668417	3.64050528014155	0.000272103527157109	0.00773888141804313	proteasome 20S subunit alpha 2
929	ENSSSCG00000039695		130.88994786654	-1.41618010348523	0.485518186506332	-2.91684254646712	0.00353594220287601	0.0472332683210674	coiled-coil domain containing 121
930	NA	NA	17.187949298348	3.2124949269918	0.799755074089744	4.01684844656743	5.89816283220266e-05	0.00249171510525334	NA
931	ENSSSCG00000039751	NLRC5	977.474840175218	2.62221820738711	0.464917377194447	5.64018110747103	1.69871397139856e-08	3.03000240231683e-06	NLR family CARD domain containing 5
932	ENSSSCG00000039767	TH	9.8129293972088	-6.90098176292065	1.74351816690956	-3.9580784954784	7.55551298849589e-05	0.00297444282446291	tyrosine hydroxylase
933	ENSSSCG00000039770	SLC6A9	1470.78627034683	2.64472427023818	0.471594968080857	5.60804175031979	2.04628671096339e-08	3.47820592941166e-06	solute carrier family 6 member 9
934	ENSSSCG00000039802	FBXL2	234.822475070039	-1.21356454810849	0.33989296901952	-3.57043145555269	0.000356393708951403	0.00950032528953852	F-box and leucine rich repeat protein 2
935	NA	NA	14.6089429798293	-2.85520894900158	0.79387370191502	-3.59655313195803	0.00032246174269189	0.00877387430962792	NA
936	ENSSSCG00000039947	KCNJ2	317.478177296811	-1.05900044687395	0.360481683490188	-2.93773718714552	0.00330617162463589	0.0448943304818979	potassium inwardly rectifying channel subfamily J member 2
937	ENSSSCG00000039950	RMI1	181.114263788031	1.98022010844316	0.408576142544372	4.84663665409222	1.25572102762666e-06	0.000106097411737719	RecQ mediated genome instability 1
938	ENSSSCG00000039966	NXPH4	13.6853833294107	-2.33207406560394	0.779254036637107	-2.99270065467748	0.00276520825492626	0.0407890345248521	neurexophilin 4
939	ENSSSCG00000039983	GJA4	331.99893931732	-1.73109117171093	0.504904921209222	-3.42854881977591	0.00060681738692864	0.0140501564204247	gap junction protein alpha 4
940	ENSSSCG00000040013	MTUS1	1165.75895714175	1.98997224564907	0.480211261456616	4.14395164247694	3.41371759361776e-05	0.00161158275804072	microtubule associated scaffold protein 1
941	NA	NA	28.2342161460354	-1.85713410746074	0.545721522389477	-3.40308019982272	0.000666307191196621	0.0152082248000139	NA
942	NA	NA	251.805474923136	1.31735199749583	0.360307147005826	3.65619169212463	0.000255989959046274	0.00738232121417279	NA
943	ENSSSCG00000040095	GPR35	96.3364895550325	-1.52774242247144	0.398263660368234	-3.83600758617768	0.000125050546560861	0.00432232128399836	G protein-coupled receptor 35
944	ENSSSCG00000040166	FLRT2	1951.79858290866	1.94279130492663	0.387194933785589	5.01760517869394	5.23195594809276e-07	5.03941996920294e-05	fibronectin leucine rich transmembrane protein 2
945	NA	NA	190.753044728088	-1.805236572722	0.50659671153491	-3.56345892426425	0.0003659999885296	0.00964957633991909	NA
946	ENSSSCG00000040286	CYLD	2121.98975528408	1.13091114100887	0.273979453484697	4.12772245007795	3.66373947325595e-05	0.00170204848583929	CYLD lysine 63 deubiquitinase
947	ENSSSCG00000040317	SOD2	116831.369667733	1.25090723888684	0.407916582478378	3.06657609084364	0.00216525690186217	0.0348370063675997	superoxide dismutase 2
948	ENSSSCG00000040445	RND3	8365.39672365152	1.18599687101609	0.299575794783709	3.95892088635655	7.5289169175005e-05	0.00297444282446291	Rho family GTPase 3
949	ENSSSCG00000040513	AQP3	34.0348803133957	-1.62675324805768	0.536714794126259	-3.03094542177833	0.0024378931069944	0.0376310679592468	aquaporin 3
950	ENSSSCG00000040557	SERTM1	46.4290288453716	-2.5966771511398	0.73210471585995	-3.5468657623516	0.000389843174711566	0.010094003921564	serine rich and transmembrane domain containing 1
951	ENSSSCG00000040575	ISG15	17521.6963863785	2.37284215586861	0.437955630867111	5.41799668420886	6.0270533674559e-08	8.75081562322565e-06	ISG15 ubiquitin like modifier
952	ENSSSCG00000040617	TNFAIP8	921.718703366335	2.0292202783004	0.41454695874521	4.89503115507743	9.82901557317537e-07	8.61196333044967e-05	TNF alpha induced protein 8
953	ENSSSCG00000040648	CCL8	36.185780425759	2.19756947607927	0.685468546524141	3.20593773007187	0.00134623117570385	0.0251964340904493	chemokine (C-C motif) ligand 8 [Source:NCBI gene (formerly Entrezgene)
954	ENSSSCG00000040697	PROSER1	714.661354387796	1.31608908855216	0.288479727260322	4.5621545092648	5.06313646029312e-06	0.000351693247972668	proline and serine rich 1
955	ENSSSCG00000040740	C22orf39	242.59306524716	-1.47308106496419	0.399705855024841	-3.68541277653448	0.000228332272302083	0.00676455438758473	chromosome 22 open reading frame 39
956	ENSSSCG00000040778	NIPA1	111.991334257082	1.58070401284069	0.377809649149246	4.1838635312786	2.86596196634634e-05	0.0014084155948902	NIPA magnesium transporter 1
957	ENSSSCG00000040779	CBS	118.011479977844	-1.42694858249911	0.445498166230619	-3.20304030558103	0.00135984947563721	0.0253972156097452	cystathionine beta-synthase
958	ENSSSCG00000040847	AP1S3	86.8790294747374	1.61380267513008	0.39324120243596	4.10384940625059	4.06332012816493e-05	0.00185195107923429	adaptor related protein complex 1 subunit sigma 3
959	ENSSSCG00000040850	GPR17	121.903331763874	-1.47812414993409	0.445212193752841	-3.32004417371073	0.000900032055488416	0.0189834498360535	G protein-coupled receptor 17
960	ENSSSCG00000040859	LLGL1	887.707666529234	1.03715256663814	0.352587742714976	2.94154458873675	0.00326579822164809	0.0448093567961744	LLGL scribble cell polarity complex component 1
961	ENSSSCG00000040887	HEATR3	1388.67330041308	1.61175446471537	0.266707126312098	6.04316235191	1.51122447284414e-09	3.83055634800914e-07	terminal nucleotidyltransferase 4B
962	NA	NA	28.2520505277746	-2.40491701754183	0.637903439540063	-3.7700329994706	0.000163225963600875	0.00538422082672475	NA
963	NA	NA	101.990316329209	-2.18306913233529	0.43452682502395	-5.02401464446979	5.06023760797038e-07	4.90673241341987e-05	NA
964	NA	NA	42.4310967678281	-2.45746745560036	0.579306447556802	-4.2420854557456	2.21452332841935e-05	0.00113862751064067	NA
965	NA	NA	14.7118840874484	-2.80168004203942	0.904274128054736	-3.09826407183225	0.00194657891956332	0.0322895203557414	NA
966	NA	NA	12.9270738003824	-2.80809224304003	0.914515951048815	-3.07057765347839	0.00213645122517744	0.0345429346319732	NA
967	NA	NA	18.883618734117	-3.54829631628973	1.12739884473014	-3.14733009784045	0.00164768832060173	0.0288662359202809	NA
968	NA	NA	65.1282167834551	-1.24986564864599	0.424123018467066	-2.94694132179728	0.00320934097110422	0.0443341371113469	NA
969	NA	NA	75.5310936955912	-1.60365246005443	0.512278982467664	-3.1304279795544	0.00174551794555131	0.030166558944169	NA
970	NA	NA	109.887915354752	2.5596060560124	0.486019142422517	5.26647169338697	1.39070678711583e-07	1.68848165212181e-05	NA
971	NA	NA	34.1754672247123	-1.53012787340259	0.516478444156915	-2.96261710573484	0.00305035752675517	0.04316509847851	NA
972	NA	NA	42.0442700956123	-1.37151258338852	0.473805121148521	-2.89467657095795	0.00379549378878652	0.0493141135435141	NA
973	NA	NA	16.283415842127	-2.927223263869	0.821248068867364	-3.56435938766482	0.00036474591844806	0.00964957633991909	NA
974	NA	NA	83.5180317212478	-1.83748850432946	0.465849731201761	-3.94438030390028	8.00066031139877e-05	0.00311254779036269	NA
975	NA	NA	12.54921316755	-2.55712437519483	0.859914624292476	-2.97369564716822	0.00294236762065067	0.042341959544981	NA
976	NA	NA	33.6838185350385	-2.05969832675108	0.588635437958418	-3.49910690714578	0.000466819369987986	0.0114315360298075	NA
977	NA	NA	18.621864930977	-2.7640452703676	0.936717383306787	-2.95077823858676	0.00316974407357036	0.0440160360565987	NA
978	NA	NA	18.7242693432983	-2.09646278110312	0.705669793896103	-2.97088354813694	0.00296944354607481	0.0424445138166637	NA
979	NA	NA	8.93734748422148	-3.45422141003634	1.01257683458345	-3.41131782997715	0.000646496850500672	0.0148263277714821	NA
980	NA	NA	5.75525179136217	4.79469937793429	1.58862839362329	3.01813778299575	0.00254333240730566	0.0388216570760287	NA
981	NA	NA	14.9679943925625	-2.75722541189202	0.782419520759729	-3.52397318667965	0.000425127267290576	0.0106673967534334	NA
982	NA	NA	160.847977706339	-1.55373762306782	0.38514733567919	-4.03413831314159	5.48030318874679e-05	0.00234953769943661	NA
983	NA	NA	19.2912492710493	-2.32038309013101	0.791123435826133	-2.93302281926201	0.00335679219082034	0.0452837848487136	NA
984	NA	NA	53.882462539895	1.62848920158732	0.551837852408187	2.951028448811	0.00316717744074029	0.0440160360565987	NA
985	NA	NA	49.1086161331913	-2.38225976110853	0.756531351336948	-3.14892404247172	0.001638727832611	0.02879379537658	NA
986	NA	NA	174.980731148701	-1.20517798790538	0.370131249004952	-3.25608278454017	0.0011296081053167	0.0222958714557592	NA
987	NA	NA	8.51043562464659	-4.04128087786966	1.34744600865	-2.99921544308747	0.00270675832738468	0.0402752258641132	NA
988	NA	NA	56.2374373629436	-2.04142175653004	0.626521153132569	-3.25834450492701	0.00112064271747767	0.0221795150439965	NA
989	NA	NA	142.847612276333	1.62606612308554	0.519236190884674	3.13165020395641	0.00173826843427694	0.030166558944169	NA
990	NA	NA	52.7185034769111	-2.13923403296709	0.588069347533417	-3.63772409145254	0.000275057846980935	0.00780512867357647	NA
991	ENSSSCG00000042718	GNAT1	534.540034511829	-2.04682266064679	0.418245949328677	-4.89382542480598	9.88945713414937e-07	8.61196333044967e-05	G protein subunit alpha transducin 1
992	NA	NA	90.8696915852761	1.76144499518169	0.540198914256053	3.26073405313579	0.00111124212821828	0.0220538822369474	NA
993	NA	NA	55.9535473623732	-2.02219918892127	0.483188215960659	-4.18511694226815	2.85019330440843e-05	0.00140764950229824	NA
994	NA	NA	19.1444576395553	-2.97677934094999	0.828154465564182	-3.594473573142	0.000325048134305551	0.00882762301587708	NA
995	NA	NA	9.02553928352719	-2.95539164711081	0.977362571449662	-3.02384369265058	0.00249585353348161	0.0382397580612325	NA
996	NA	NA	19.2801624730841	-2.71673102214989	0.787555379413685	-3.44957458632614	0.000561470600315547	0.0132323116720241	NA
997	NA	NA	98.696496124904	-1.24155080964638	0.400194766766075	-3.10236642942436	0.00191980162074622	0.0320662356260594	NA
998	NA	NA	14.5490516253976	-2.51859796727081	0.815738237837648	-3.08750754892536	0.0020184264511102	0.0332421961092534	NA
999	NA	NA	71.7473674610609	-1.31861890614302	0.445915902287149	-2.95710222349032	0.00310545145112927	0.0436454888773499	NA
1000	NA	NA	34.8012202786971	-1.73785928635652	0.551389035695103	-3.15178426456324	0.00162276120773452	0.0285806984325387	NA
1001	NA	NA	51.0842700008591	-2.74445145706599	0.61003934352335	-4.4988105868961	6.83347071963681e-06	0.000454976889204206	NA
1002	NA	NA	61.52035344863	-1.89199662735772	0.44333405884307	-4.26765458150248	1.97538883222749e-05	0.00105315195011154	NA
1003	NA	NA	26.3827175841151	-2.00919387165514	0.555616435247994	-3.61615269850388	0.000299014032223024	0.00832399756754962	NA
1004	NA	NA	15.1327644793929	-2.27808068936519	0.787163135722829	-2.8940388414827	0.00380321112828453	0.0493699859671652	NA
1005	NA	NA	13.3811631962191	-3.17738684229064	0.976636423314753	-3.25339785250526	0.00114033715463236	0.0224463095505836	NA
1006	NA	NA	41.7415669893563	-1.88183885779573	0.595629240033296	-3.15941315723608	0.0015808720619269	0.0280940215876013	NA
1007	NA	NA	24.6675512528573	-2.57814560354456	0.662553440221152	-3.89122664985938	9.97387104704212e-05	0.00365742357582905	NA
1008	NA	NA	11.8082865854075	-3.04719928474661	0.955998229904783	-3.18745285234483	0.00143531856193005	0.0262864688433456	NA
1009	NA	NA	1232.9392099385	2.06204725355662	0.497669408434034	4.14340768914259	3.42182843741698e-05	0.00161158275804072	NA
1010	NA	NA	778.493329830562	-1.60196886280418	0.370314582394073	-4.32596753940256	1.51863787011121e-05	0.000863829919187667	NA
1011	NA	NA	394.152612789991	-1.83366613865387	0.372891619381518	-4.91742383938584	8.76905557535956e-07	7.86927422067049e-05	NA
1012	NA	NA	8.09950730576206	-4.76765798699519	1.37608043839563	-3.46466518523713	0.000530891987168114	0.012751329708269	NA
1013	ENSSSCG00000045134	FASTKD5	456.184744202597	0.961363483447112	0.325713145469576	2.95156488713751	0.00316168109022779	0.0440160360565987	FAST kinase domains 5
1014	NA	NA	80.6703939156234	1.8704450013674	0.622632083948699	3.004093508168	0.00266373443002727	0.0398402019099731	NA
1015	NA	NA	127.642748961327	-3.79600531299015	0.649346795627587	-5.84588287576187	5.03888507381875e-09	1.08659420218706e-06	NA
1016	NA	NA	49.7409087939734	-1.37548587325478	0.457281976429306	-3.00795995502663	0.00263007791875147	0.0395003802184212	NA
1017	ENSSSCG00000045508	CCDC180	3118.43381465605	1.0860948189939	0.322383626180096	3.36895155583107	0.000754546893707695	0.0167976787677793	coiled-coil domain containing 180
1018	NA	NA	28.9010990328612	3.52072163908982	0.808560441239815	4.3543085458043	1.3348758420248e-05	0.00078082130224997	NA
1019	NA	NA	69.2028499493027	-1.82129642674066	0.499727932877041	-3.64457599209047	0.000267832991935277	0.00767787910214462	NA
1020	NA	NA	123.997190496494	1.46139051541316	0.488598500710089	2.99098444487509	0.0027807965799299	0.0409516521123345	NA
1021	NA	NA	9.64603302988947	-3.06889255295351	0.972262136475026	-3.15644561052217	0.0015970466894318	0.0282688793372021	NA
1022	NA	NA	22.7313580254603	-1.92338705204292	0.592022764627088	-3.24883968482943	0.00115876764363335	0.0226787695309038	NA
1023	NA	NA	77.9447640177707	2.27712282027096	0.550962968269387	4.13298706340203	3.58078888148607e-05	0.00167427953914921	NA
1024	NA	NA	219.564035711604	-1.23220795727998	0.41301505746351	-2.98344560328492	0.00285022695303407	0.0416802419204821	NA
1025	NA	NA	38.5370579924586	-2.59747026490805	0.811361730722909	-3.20137143095688	0.00136775098113286	0.0254591449491171	NA
1026	NA	NA	5.22254137926845	-4.99866685749058	1.60282174502085	-3.11866673447555	0.00181671319882501	0.0309241309758537	NA
1027	NA	NA	62.6944315723278	-1.60750409123588	0.520491221925518	-3.08843650674654	0.00201212684778411	0.0331863112976995	NA
1028	ENSSSCG00000046640	OAS1	1079.18802823469	2.080848139356	0.631017242769032	3.29760900070626	0.000975118182208371	0.0203004430785973	2'-5'-oligoadenylate synthetase 1
1029	NA	NA	166.991760570748	-1.24435866382267	0.430039122046684	-2.89359409418473	0.00380860157405376	0.0493955794810851	NA
1030	NA	NA	54.7508156183183	1.66625738533626	0.5241131757151	3.179193850761	0.00147685287103727	0.0268059928150081	NA
1031	NA	NA	24.3099113900999	-4.72420936589193	0.880664536161982	-5.36436880549372	8.12327766187186e-08	1.11776300627357e-05	NA
1032	NA	NA	10.4170862925581	-3.68654828608893	1.06873184179203	-3.44946051191605	0.000561707877550907	0.0132323116720241	NA
1033	NA	NA	75.1345693485019	-3.38513060932701	0.547033101791249	-6.18816411336439	6.0868941043148e-10	1.6912201157527e-07	NA
1034	NA	NA	6.34690526125321	-4.25337171283974	1.41148010533595	-3.01341244326456	0.00258327571536214	0.0390558811878777	NA
1035	NA	NA	17.522783815705	-4.45411693359645	1.02557224280949	-4.34305526970455	1.40514765362057e-05	0.000808827621494421	NA
1036	ENSSSCG00000047080	OPRD1	36.3843523679511	-2.79575282233307	0.653255358843536	-4.27972428313856	1.87124983317812e-05	0.00100504898103188	opioid receptor delta 1
1037	NA	NA	27.7788918008194	-2.05539962903385	0.670459781671924	-3.06565685999584	0.00217192417604451	0.034851228992151	NA
1038	NA	NA	96.8394776845875	-2.3308451781378	0.596456465981781	-3.90782112538789	9.31322139418873e-05	0.00346797481193914	NA
1039	NA	NA	14.8956433727835	-2.32582166604685	0.716313197172858	-3.24693398813032	0.00116655443265843	0.0227761870852014	NA
1040	NA	NA	9.8808758130004	-3.60628494475624	1.10317109964909	-3.26901687861779	0.00107921863533226	0.0215664603641501	NA
1041	NA	NA	18.3321088440337	-2.92993088189185	0.80933865780238	-3.62015437375446	0.000294427301202642	0.00822801866107501	NA
1042	NA	NA	5.42190938609986	-5.04959436155826	1.71329622380202	-2.94729789945639	0.00320564218849062	0.0443341371113469	NA
1043	NA	NA	236.804696209284	-1.59051456108113	0.528267342546289	-3.01081371681	0.00260548643623136	0.0392534598859965	NA
1044	NA	NA	75.9949898154849	-1.73800012809005	0.528940330751504	-3.28581510436299	0.00101687734720085	0.020780543016065	NA
1045	NA	NA	156.169706615792	-1.07764082993889	0.349924886093011	-3.07963472381457	0.00207254610419991	0.0337970046427543	NA
1046	NA	NA	134.628832176624	-1.78998604471337	0.597298838222206	-2.9968014838955	0.0027282831478612	0.0405120605552914	NA
1047	NA	NA	11.0648357337081	-2.69554442448494	0.861439718640635	-3.12911555638339	0.0017533334075199	0.0301932789890912	NA
1048	NA	NA	8.14904659379716	-3.41599898331471	1.17662398358338	-2.90322059636364	0.00369346375112202	0.0483800220092574	NA
1049	NA	NA	19.7238352630686	-3.40887398719621	0.779251553260387	-4.37454885130929	1.21683871995899e-05	0.000716965026378526	NA
1050	NA	NA	64.5436535545429	-1.41259343799173	0.409547272491401	-3.44915845586883	0.00056233661175407	0.0132323116720241	NA
1051	NA	NA	61.808219543756	-2.02456471379517	0.627445535261111	-3.22667801429594	0.00125236302493406	0.0239024319474866	NA
1052	NA	NA	23.2534571933727	-1.99847684758244	0.654441066164345	-3.0537155305602	0.00226026296031688	0.0358073237397568	NA
1053	NA	NA	20.8788799913539	-2.30413010566195	0.654930393683075	-3.51812975529264	0.000434599802701833	0.0108073975033323	NA
1054	NA	NA	1024.89501192096	-1.45444978391843	0.447289377067821	-3.25169757764646	0.00114718012348608	0.0225466757310745	NA
1055	NA	NA	11.9857857332501	-3.07143761121169	1.00678074406305	-3.05075124780033	0.00228269606467481	0.0359955165669766	NA
1056	NA	NA	11.9695488378208	-2.41635058108042	0.810292444075331	-2.9820722120121	0.00286304459190547	0.041740936694097	NA
1057	NA	NA	21.0453828727825	-2.32114649261519	0.678969465228342	-3.41863163439106	0.000629368670552931	0.0144794881403642	NA
1058	ENSSSCG00000049630	DEPTOR	338.844589286492	-1.50449832355018	0.370256662227549	-4.06339298393384	4.83645013057212e-05	0.00214758966955727	DEP domain containing MTOR interacting protein
1059	NA	NA	18.5185545743419	-2.80692847787335	0.690492640166454	-4.06510991514218	4.80098306229014e-05	0.00214751093758415	NA
1060	NA	NA	379.545822313349	-1.47000383330052	0.415696959991858	-3.53623907504474	0.000405867212823816	0.0103420978675106	NA
1061	NA	NA	15.8479955949033	-3.00089710205133	0.788821818077334	-3.80427751018055	0.000142218672707677	0.00481212033555155	NA
1062	NA	NA	24.1271088223185	-2.24503754241055	0.672179725177304	-3.33993641628861	0.00083797573233002	0.0180387502359524	NA
1063	NA	NA	79.6699956791154	-2.93617271676681	0.497622020009765	-5.9004075356416	3.62604787959038e-09	8.58838356792162e-07	NA
1064	NA	NA	18.2504932753013	-4.92335628215046	1.13119988542956	-4.35233095898066	1.34697720307436e-05	0.00078472284798461	NA
1065	NA	NA	128.084658021753	-2.22286861646146	0.747134165525378	-2.97519337092336	0.00292803911364102	0.0422620470668187	NA
1066	NA	NA	16.2631205091333	-2.12576605853944	0.685983790503382	-3.09885756481145	0.00194268391603312	0.0322755908886014	NA
1067	NA	NA	30.9130956736841	-2.54138387136277	0.693970959700123	-3.66208965352232	0.000250166272915159	0.00727634996971977	NA
1068	NA	NA	60.3558950148542	1.42564663865805	0.449799895185101	3.16951305217928	0.00152694599976183	0.027371359559006	NA
1069	NA	NA	487.584088987375	1.09881457187583	0.378208342846992	2.90531552954231	0.00366883041992923	0.0481645577087957	NA
1070	NA	NA	47.3046904613312	1.52312872109127	0.465364483717323	3.2729801572405	0.0010641994825311	0.021384637167746	NA
1071	NA	NA	112.518478493723	-1.08102055207192	0.36759632309578	-2.94078173298335	0.0032738513241808	0.0448346956699186	NA
1072	NA	NA	24.3744852867363	-3.21106926059122	1.02807195566519	-3.12338960604522	0.0017878091804887	0.0307137539116537	NA
1073	NA	NA	75.6571372574865	-2.03829637049367	0.611806729015947	-3.33160175235755	0.000863477269775504	0.0184276508031263	NA
1074	NA	NA	1206.11062145633	-1.82513814830208	0.385147281209638	-4.73880574353228	2.14981470957028e-06	0.000167894718507413	NA
1075	NA	NA	31.8942324082387	1.74546839764254	0.600869975369872	2.90490200740701	0.00367368096588406	0.0481645577087957	NA
1076	NA	NA	42.7980919152392	1.62026839937642	0.536018033589557	3.02278710387028	0.00250458376503461	0.0383328667767162	NA
1077	NA	NA	34.4089882457111	-1.74958798661063	0.589254658239782	-2.96915427336118	0.00298620632438454	0.0425910256413701	NA
1078	NA	NA	270.432673618446	-2.22747914852596	0.441254113083425	-5.04806432955521	4.46308878861482e-07	4.38078816043397e-05	NA
1079	NA	NA	155.172337865581	-1.89289778281539	0.445585723785896	-4.24811137738543	2.15580217550008e-05	0.00111239392255804	NA
1080	NA	NA	9.266862984192	-3.0854709714476	1.01522430052151	-3.03920125814819	0.00237206331205908	0.0368908188725829	NA
1081	NA	NA	8.09439260191516	-3.68742822171619	1.12429466067443	-3.27977028682519	0.00103891640358896	0.0210522639537914	NA
1082	NA	NA	10.7257866346876	3.13356829586725	1.02221902352627	3.0654568382592	0.00217337744476246	0.034851228992151	NA

## Sheet: PP vs. CtrP
Differentially expressed genes identified after treatment of the porcine myometrium on days 14-15 of pregnancy with PPARγ agonist pioglitazone vs. control
	Row.names	gene_name	baseMean	log2FoldChange	lfcSE	stat	pvalue	padj	description
1	ENSSSCG00000004154	TNFAIP3	5413.10893992553	-0.916047965809763	0.246676216519152	-3.71356419656551	0.000204360594255958	0.0479566194520648	TNF alpha induced protein 3
2	ENSSSCG00000005385	NR4A3	8787.17296213839	-1.40808702997018	0.359138334812312	-3.9207372020201	8.82784932018552e-05	0.031074029607053	nuclear receptor subfamily 4 group A member 3
3	ENSSSCG00000010451	IFIT2	6242.63933883319	-1.9075792969667	0.387663075190158	-4.92071445295888	8.62288588996367e-07	0.000607051166653442	interferon induced protein with tetratricopeptide repeats 2
4	ENSSSCG00000010454	IFIT5	10461.43547131	-1.08083825100781	0.274828381006105	-3.93277523613473	8.39707466096499e-05	0.031074029607053	interferon induced protein with tetratricopeptide repeats 5
5	ENSSSCG00000014987	MMP12	5922.26479356374	-1.52499677977655	0.308232881162889	-4.947547367507	7.51544191006007e-07	0.000607051166653442	matrix metallopeptidase 12
6	ENSSSCG00000027607	IER3	8945.59953905727	-1.26589110047883	0.339831334238198	-3.72505702958965	0.00019527107098901	0.0479566194520648	immediate early response 3

## Sheet: PC vs. CtrC
Differentially expressed genes identified after treatment of the porcine myometrium on days 14-15 of the estrous cycle with PPARγ agonist pioglitazone vs. control
	Row.names	gene_name	baseMean	log2FoldChange	lfcSE	stat	pvalue	padj	description
1	ENSSSCG00000008953	CXCL8	9271.49087833166	0.909250769003802	0.176870798075575	5.14076251646295	2.73625724866549e-07	0.00058136345676646	C-X-C motif chemokine ligand 8
2	ENSSSCG00000008957	AMCF-II	3890.51586121819	1.17203818423634	0.213035756012843	5.50160314011178	3.7635334267959e-08	0.000239887620623971	alveolar macrophage-derived chemotactic factor-II
3	ENSSSCG00000008959	CXCL2	10945.1545852497	0.981204430055379	0.189558850922341	5.1762522577084	2.26387319844145e-07	0.00058136345676646	chemokine (C-X-C motif) ligand 2
4	ENSSSCG00000017488	CSF3	418.462939813412	1.05379789047017	0.219947648610035	4.79113051278192	1.65844199932699e-06	0.00264272732592755	colony stimulating factor 3

## Sheet: TP vs. CtrP
Differentially expressed genes identified after treatment of the porcine myometrium on days 14-15 of pregnancy with PPARγ antagonist T0070907 vs. control
	Row.names	gene_name	baseMean	log2FoldChange	lfcSE	stat	pvalue	padj	description
1	ENSSSCG00000000148	LOC106510284	631.935055789116	-1.50829499667912	0.337570177428519	-4.46809314782704	7.89199416926249e-06	0.00394765855708793	apolipoprotein L3-like
2	ENSSSCG00000000774	USP18	1566.39328784327	-1.05028905186456	0.240276849070246	-4.37116208210931	1.23587005313597e-05	0.00456406167105804	ubiquitin specific peptidase 18
3	ENSSSCG00000001595	DAAM2	2467.32314096935	-0.907256480929161	0.240586398689422	-3.77102149527728	0.000162580666389595	0.0245264548153446	dishevelled associated activator of morphosis 2
4	ENSSSCG00000001906	CYP1A1	377.059131463768	1.18060371960399	0.287994063231617	4.09940297503459	4.1421727247735e-05	0.00960175843323106	cytochrome P450 family 1 subfamily A member 1
5	ENSSSCG00000002383	FOS	18303.4812382496	0.970278191804068	0.230815978868358	4.20368726879801	2.62601696540009e-05	0.007053569239181	Fos proto-onco, AP-1 transcription factor subunit
6	ENSSSCG00000002829	MMP2	13505.2320192168	-1.15641829602857	0.274299266319595	-4.21590006982077	2.48783915590885e-05	0.007053569239181	matrix metallopeptidase 2
7	ENSSSCG00000003137	PLEKHA4	1060.73659539003	-1.20275996463962	0.252445947774719	-4.7644257126795	1.89392274727758e-06	0.00128570298500901	pleckstrin homology domain containing A4
8	ENSSSCG00000003197	MED25	1123.93476276844	-0.933293752912474	0.260151532967578	-3.58750049352501	0.000333863101153868	0.0382293363056188	mediator complex subunit 25
9	ENSSSCG00000003705	CABLES1	1346.67571832169	-0.938355800008635	0.215185823397123	-4.36067667095759	1.29660842927785e-05	0.00456406167105804	Cdk5 and Abl enzyme substrate 1
10	ENSSSCG00000004195	ARG1	589.151937634232	-1.68792368045429	0.370118285394928	-4.56049794636117	5.10324614854909e-06	0.00269451396643392	arginase 1
11	ENSSSCG00000004479	FILIP1	3069.95627750121	-0.935279404903989	0.231336156416184	-4.04294520749873	5.27839588933717e-05	0.0109056248983175	filamin A interacting protein 1
12	ENSSSCG00000005400	GRIN3A	166.748696601469	1.60350057312502	0.387439286543301	4.13871444847866	3.49257322513259e-05	0.00851113229016928	glutamate ionotropic receptor NMDA type subunit 3A
13	ENSSSCG00000005480	NA	1037.99108601338	-0.906082256696967	0.233695938307658	-3.87718444427613	0.000105672249135934	0.0185983158479244	regulator of G protein signaling 3
14	ENSSSCG00000006140	CA2	209.121660343131	1.3663306677235	0.34522463612581	3.95780174629707	7.56426991942794e-05	0.014096239473381	carbonic anhydrase 2
15	ENSSSCG00000006864	CDC14A	399.782325744078	-1.09589314317158	0.284128547274921	-3.85703285953594	0.000114771738464375	0.0197147014691597	cell division cycle 14A
16	ENSSSCG00000006893	BCAR3	430.990871756641	0.978241364947531	0.248824337261129	3.93145371435638	8.44337535617843e-05	0.0154318921894461	BCAR3 adaptor protein, NSP family member
17	ENSSSCG00000006988	PDGFRL	774.102286693539	-1.40561930153689	0.36831077744624	-3.81639470689141	0.000135415822600453	0.0214498662999118	platelet derived growth factor receptor like
18	ENSSSCG00000008647	CMPK2	5063.80200404707	-1.05379323102245	0.238845083206521	-4.41203652541288	1.02402832593633e-05	0.00423146313465169	cytidine/uridine monophosphate kinase 2
19	ENSSSCG00000008648	RSAD2	16825.4990716735	-1.20700947604914	0.246620380293556	-4.89420004385857	9.87063979986317e-07	0.000908577177949305	radical S-adenosyl methionine domain containing 2
20	ENSSSCG00000008844	KDR	1579.08284646295	1.08496010380135	0.220261114519901	4.92579049264424	8.40199847011208e-07	0.000887251038443835	kinase insert domain receptor
21	ENSSSCG00000009240	NA	959.390545639172	-1.20638106013086	0.313829797705273	-3.84406155486806	0.000121014630513335	0.0201775973403287	placenta associated 8
22	ENSSSCG00000009331	MEDAG	154.70250942773	-1.26864970869841	0.319207989896475	-3.97436702355056	7.05666744063869e-05	0.013413313471166	mesenteric estrogen dependent adiposis
23	ENSSSCG00000009446	PCDH17	431.986490030998	1.04897102867625	0.248160939760753	4.22697878919841	2.36849984373273e-05	0.007053569239181	protocadherin 17
24	ENSSSCG00000010451	IFIT2	6055.47445417224	-1.52257409532672	0.232466327816124	-6.54965435050466	5.76704074276109e-11	5.48099552192014e-07	interferon induced protein with tetratricopeptide repeats 2
25	ENSSSCG00000010452	IFIT1	17338.5006952927	-1.52593966965165	0.264191992578318	-5.77587403296978	7.6554633085396e-09	3.63787616421802e-05	interferon induced protein with tetratricopeptide repeats 3
26	ENSSSCG00000010454	IFIT5	10201.0330073268	-0.901945587165949	0.204387299228841	-4.41292384883511	1.0198387552002e-05	0.00423146313465169	interferon induced protein with tetratricopeptide repeats 5
27	ENSSSCG00000010603	NEURL1	3514.19017633184	-1.07748619031184	0.307630305873486	-3.50253590020146	0.000460851674492056	0.0466540647084805	neuralized E3 ubiquitin protein ligase 1
28	ENSSSCG00000011239	TRANK1	1778.49400834208	-1.01602479609526	0.242343750930934	-4.19249430691869	2.75904008365908e-05	0.00708700458245836	tetratricopeptide repeat and ankyrin repeat containing 1
29	ENSSSCG00000011453	ITIH4	894.963744250841	-1.13071611101282	0.246260905299988	-4.59153721389684	4.39993166218589e-06	0.00261355940733842	inter-alpha-trypsin inhibitor heavy chain 4
30	ENSSSCG00000011670	PXYLP1	731.269468532067	-1.11325527758462	0.307916180775609	-3.61544909650555	0.000299827388275994	0.0360703733946208	2-phosphoxylose phosphatase 1
31	ENSSSCG00000011928	CCDC80	3087.41923210338	-1.10113811724132	0.276214399262208	-3.98653408432925	6.70455001027095e-05	0.0131894139750387	coiled-coil domain containing 80
32	ENSSSCG00000011951	NFKBIZ	7668.16891419937	-1.13981408067615	0.291377879739978	-3.91180717525058	9.16080427667871e-05	0.0164272233670857	NFKB inhibitor zeta
33	ENSSSCG00000012076	MX2	23728.144444767	-1.36308074234292	0.297702046791411	-4.57867440628644	4.67931913451467e-06	0.00261601465026043	myxovirus (influenza virus) resistance 2 (mouse)
34	ENSSSCG00000012077	MX1	16512.8237583173	-1.01167296820563	0.243105138481661	-4.1614627091971	3.16215639955193e-05	0.00790871958456357	MX dynamin like GTPase 1
35	ENSSSCG00000012277	TIMP1	44071.007412601	-1.12496435834462	0.266692882754725	-4.21820165099509	2.46258539248819e-05	0.007053569239181	TIMP metallopeptidase inhibitor 1
36	ENSSSCG00000013313	PRRG4	523.410027922746	-0.979115644548836	0.258499210210941	-3.78769298269754	0.000152052574493919	0.0236902896391837	proline rich and Gla domain 4
37	ENSSSCG00000013382	PLEKHA7	613.595160690245	-1.03213601544628	0.287505914222791	-3.58996446468391	0.000330723044417623	0.0382293363056188	pleckstrin homology domain containing A7
38	ENSSSCG00000014336	EGR1	13283.4795316118	1.22298869242655	0.223001711422507	5.48421213732049	4.15316157227861e-08	0.000131572158609786	early growth response 1
39	ENSSSCG00000014987	MMP12	4976.84115328354	-0.92234053088938	0.249058732451247	-3.70330532807127	0.000212808496916088	0.029312057314355	matrix metallopeptidase 12
40	ENSSSCG00000016450	NOS3	828.711849014813	0.98307316477329	0.256913540427088	3.82647470872515	0.000129991498249155	0.0209396474467791	nitric oxide synthase 3
41	ENSSSCG00000016502	PARP12	4160.95150880041	-1.22156871183429	0.300705475764756	-4.06234275823408	4.85826719093658e-05	0.0102606603072581	poly(ADP-ribose) polymerase family member 12
42	ENSSSCG00000017146	NA	10932.0203579038	-1.01223143205463	0.251641443052327	-4.0225148122527	5.75800318229352e-05	0.0116434174988335	NA
43	ENSSSCG00000017402	STAT5A	2255.51964747377	-1.10745570986663	0.316683398525122	-3.49704378260542	0.000470444615309076	0.0466540647084805	signal transducer and activator of transcription 5A
44	ENSSSCG00000017416	DHX58	2355.82574517711	-1.37191082584849	0.264372862041844	-5.18930277204984	2.11082942589532e-07	0.00035557339292822	DExH-box helicase 58
45	ENSSSCG00000017705	CCL5	1555.71177117965	-1.03831891983128	0.243223544034421	-4.26899017508082	1.96359916781275e-05	0.00666501660389013	C-C motif chemokine ligand 5
46	ENSSSCG00000017755	NOS2	642.40152655619	-1.41794966641444	0.273519443457148	-5.18409093149751	2.17071014473522e-07	0.00035557339292822	nitric oxide synthase 2
47	ENSSSCG00000017886	FBXO39	1419.77386145814	-1.21939827459721	0.295295442680716	-4.12941785869574	3.6368290401729e-05	0.00864110579945081	F-box protein 39
48	ENSSSCG00000020701	TTC9	382.812915089631	-0.966482444343491	0.272161580063262	-3.55113474913997	0.000383573980468211	0.0414259898905668	tetratricopeptide repeat domain 9
49	ENSSSCG00000020990	DNAH12	113.667716722103	1.95724824535908	0.466036481771545	4.19977474278191	2.6718065299928e-05	0.007053569239181	dynein axonemal heavy chain 12
50	ENSSSCG00000021597	PHLDA2	1439.79243257938	1.34021030106018	0.289402091749361	4.63096273063874	3.63969390230504e-06	0.00230611005650048	pleckstrin homology like domain family A member 2
51	ENSSSCG00000023247	OPTN	1021.97673629661	-0.963170511406967	0.265342856172937	-3.62990933804986	0.000283520785303175	0.034545917224633	optineurin
52	ENSSSCG00000024108	SLC43A2	2119.04114096299	-0.920911848193485	0.258909014061578	-3.55689372782694	0.000375265875476981	0.0411426780433181	solute carrier family 43 member 2
53	ENSSSCG00000026602	PTGIR	605.237845635218	-0.940626150271043	0.258817079052035	-3.63432797293076	0.000278706143363208	0.034545917224633	prostaglandin I2 receptor
54	ENSSSCG00000026943	MRAP2	517.282493456386	-1.03996693414916	0.286056836415659	-3.63552553814172	0.000277414508306241	0.034545917224633	melanocortin 2 receptor accessory protein 2
55	ENSSSCG00000027477	TBC1D2B	1250.82344189971	-1.20826928999446	0.330811217730859	-3.65244352438338	0.000259756735882544	0.0342878891364959	TBC1 domain family member 2B
56	ENSSSCG00000028964	PIM2	675.371908175656	-1.01028392182992	0.268683426369187	-3.76012743131291	0.000169826826071429	0.024831294692044	Pim-2 proto-onco, serine/threonine kinase
57	ENSSSCG00000029096	HRH2	390.224317405276	-1.18179311684259	0.337168090387777	-3.50505623317856	0.000456510849158749	0.0466540647084805	histamine receptor H2
58	ENSSSCG00000030277	ENDOV	3262.92980220673	-1.1816985220734	0.327602912166167	-3.60710628077086	0.000309630857763266	0.036784145902276	endonuclease V
59	ENSSSCG00000030548	HERC5	4752.63174317504	-1.51874931542264	0.293432833562889	-5.17579882585682	2.26937884394951e-07	0.00035557339292822	HECT and RLD domain containing E3 ubiquitin protein ligase 5
60	ENSSSCG00000032115	OSGIN1	346.569604957757	1.22258993771095	0.336379089435685	3.63455986447311	0.000278455597390594	0.034545917224633	oxidative stress induced growth inhibitor 1
61	ENSSSCG00000032795	IL1RL1	10394.7155181596	-1.31073569263457	0.32157141926854	-4.07603292486634	4.58105352332885e-05	0.0101251936478412	interleukin 1 receptor like 1
62	ENSSSCG00000033142	ENDOU	470.619414192271	-0.990262996177093	0.281889584876208	-3.51294637796557	0.000443166904803349	0.0466540647084805	endonuclease, poly(U) specific
63	ENSSSCG00000033830	CCDC8	660.423999823572	-1.69164180914359	0.348681699588646	-4.85153597432641	1.22508982606277e-06	0.000970271142241711	coiled-coil domain containing 8
64	ENSSSCG00000034297	HES2	203.755430594002	1.07223876734004	0.306653082095216	3.49658565312285	0.00047125317887354	0.0466540647084805	hes family bHLH transcription factor 2
65	ENSSSCG00000034570	IFI6	2480.49080803798	-1.11784521155578	0.252827139397881	-4.42138140002681	9.80718893747613e-06	0.00423146313465169	interferon alpha inducible protein 6
66	ENSSSCG00000035297	ISG12(A)	7897.87068730909	-1.1174956739387	0.217031964548841	-5.14899119243434	2.6189117745134e-07	0.00035557339292822	putative ISG12(a) protein
67	ENSSSCG00000035495	KITLG	886.867739300684	1.08791095711049	0.249055365468243	4.36814904615742	1.25303972003195e-05	0.00456406167105804	KIT ligand
68	ENSSSCG00000036383	LGALS3BP	1557.7430098257	-1.25245265345137	0.324967721561629	-3.85408325304657	0.000116164065895722	0.0197147014691597	galectin 3 binding protein
69	ENSSSCG00000037016	ID1	613.919049379727	1.18234499271932	0.31859423378058	3.711131173622	0.000206335141059138	0.0288383703033242	inhibitor of DNA binding 1
70	ENSSSCG00000037358	NA	789.929911053709	-1.32086335765047	0.3133965719088	-4.21467072726899	2.5014286797267e-05	0.007053569239181	serum amyloid A-3 protein
71	ENSSSCG00000037572	EPSTI1	1399.02366920566	-1.27003787765369	0.287368910113791	-4.41953820665841	9.89120340252654e-06	0.00423146313465169	epithelial stromal interaction 1
72	ENSSSCG00000037684	PDYN	155.821229906718	2.02794012484113	0.400479051163547	5.06378578092706	4.11011483617117e-07	0.000488281642537135	prodynorphin
73	ENSSSCG00000038562	RND1	10029.6633046814	-1.12147510209544	0.255559488633416	-4.38831329680786	1.14233139199939e-05	0.00452363231231759	Rho family GTPase 1
74	ENSSSCG00000038912	NA	8697.17325053329	-1.08302495711104	0.301182879395574	-3.5959047847756	0.000323266032050395	0.037929881093913	NA
75	ENSSSCG00000039300	IL27	207.715094300973	-1.69528408653215	0.347271198886275	-4.88172958762217	1.05159395595984e-06	0.000908577177949305	interleukin 27
76	ENSSSCG00000040317	SOD2	135487.245880146	-1.14290511557224	0.271815584905852	-4.20470782044416	2.61419641413125e-05	0.007053569239181	superoxide dismutase 2
77	ENSSSCG00000040575	ISG15	24653.211966355	-1.02772159365172	0.282944256841117	-3.63224051664999	0.00028097105370506	0.034545917224633	ISG15 ubiquitin like modifier
78	ENSSSCG00000040617	TNFAIP8	1185.92467304913	-1.19907566665653	0.301035233710382	-3.98317383609032	6.80009769335959e-05	0.0131894139750387	TNF alpha induced protein 8
79	ENSSSCG00000040961	LIF	2747.1620579821	-1.05769452010769	0.286211151000749	-3.69550423318384	0.000219450823701566	0.0297951518351383	LIF interleukin 6 family cytokine
80	ENSSSCG00000041935	HSPB7	4454.87485566767	-0.98240002842798	0.205048723266538	-4.79105654879393	1.65905355679283e-06	0.00121289576951992	heat shock protein family B (small) member 7

## Sheet: TC vs. CtrC
Differentially expressed genes identified after treatment of the porcine myometrium on days 14-15 of the estrous cycle with PPARγ antagonist T0070907 vs. control
	Row.names	gene_name	baseMean	log2FoldChange	lfcSE	stat	pvalue	padj	description
1	ENSSSCG00000000466	XPOT	292.744217254572	-1.31086047329923	0.302921861242732	-4.3273881519196	1.50887922918892e-05	0.0146300930062158	exportin for tRNA
2	ENSSSCG00000001906	CYP1A1	864.371077585151	1.28344830676593	0.210337429621096	6.10185409738032	1.04845061252116e-09	1.01657771390051e-05	cytochrome P450 family 1 subfamily A member 1
3	ENSSSCG00000004750	OIP5	544.213966267984	-1.25813690158936	0.266826679438168	-4.71518404470835	2.41492362792913e-06	0.00468301989928016	Opa interacting protein 5
4	ENSSSCG00000006172	PI15	6533.05961134256	-1.05692739749495	0.210185593093098	-5.02854349787333	4.94219411053231e-07	0.00119798785239303	peptidase inhibitor 15
5	ENSSSCG00000007436	MMP9	241.728963214811	1.35180227791521	0.2465589939408	5.48267275230604	4.18947562283478e-08	0.00020310577819503	matrix metallopeptidase 9
6	ENSSSCG00000008359	RAB1A	2159.51984026488	-0.65897352168148	0.166134169873142	-3.96651406621927	7.29314733246622e-05	0.0441964728347453	RAB1A, member RAS onco family
7	ENSSSCG00000014336	EGR1	15415.8923989467	0.743271149650688	0.178896251741973	4.15476088745967	3.25627889946103e-05	0.024286830930134	early growth response 1
8	ENSSSCG00000017249	SSTR2	165.77342565193	-1.23820227263078	0.273961305204008	-4.51962466636936	6.19493602685417e-06	0.00950164342441782	somatostatin receptor 2
9	ENSSSCG00000018080	ATP8	805.688676151831	-1.2555694772243	0.281774546518594	-4.45593646671505	8.3527768279236e-06	0.0096329430110315	mitochondrially encoded ATP synthase membrane subunit 8
10	ENSSSCG00000020906	GHSR	379.138611057932	-1.39875100774827	0.310972013585167	-4.49799643261206	6.85968481548316e-06	0.00950164342441782	TNF superfamily member 10
11	ENSSSCG00000021597	PHLDA2	1620.09674400792	0.823327003162526	0.185379497160849	4.44130562317874	8.94146937905151e-06	0.0096329430110315	pleckstrin homology like domain family A member 2
12	ENSSSCG00000029438	SESN2	2246.39298063576	0.816751592471102	0.161293188021642	5.06376991173064	4.11045716136984e-07	0.00119798785239303	sestrin 2
13	ENSSSCG00000029615	VAMP7	587.639400788966	-0.753650607210158	0.188991361867864	-3.98775160812421	6.67024470158942e-05	0.043116461751074	vesicle associated membrane protein 7
14	ENSSSCG00000034846	NA	484.668837110902	0.945204506947654	0.226730476789352	4.16884628979903	3.06145356543663e-05	0.024286830930134	NA
15	ENSSSCG00000036213	FGF2	2506.40549290091	-0.941666744328278	0.224786725116638	-4.18915638296552	2.79993404094161e-05	0.024286830930134	fibroblast growth factor 2
16	ENSSSCG00000038994	CLIC4	17266.722064216	-0.628946108387845	0.159303176902932	-3.9481077566399	7.87713492853366e-05	0.0449274707453308	chloride intracellular channel 4
17	ENSSSCG00000042718	GNAT1	1131.91021616887	0.685329112128454	0.169641177359964	4.03987476857841	5.34797492511123e-05	0.0370385463384847	G protein subunit alpha transducin 1
